# Supplementary material for: Unravelling turbot (Scophthalmus maximus) resistance to Aeromonas salmonicida: transcriptomic insights from two full-sibling families with divergent susceptibility
Source: Front Immunol. 2024 Dec 6;15:1522666. doi: 10.3389/fimmu.2024.1522666 (PMC11659141; doi:10.3389/fimmu.2024.1522666)
Supplement: Supplementary File S2 — Differentially expressed genes (DEGs) between the resistant and susceptible families under naïve and A. salmonicida-infected conditions in liver samples. [file Table2.xlsx]

## Sheet: R_C vs S_C_Liver
Name	Chromosome	Region	Max group mean	Log₂ fold change	Fold change	P-value	FDR p-value	Bonferroni	Biotype	Kegg Orthology	Nr Description
SMAX5B_003516	CP026258.1	complement(8011214..8016245)	1.3091	7.75057	215.355	0.0016018	0.0454311	1	protein_coding	K08818//cell division cycle 2-like [EC:2.7.11.22]	AWP15179.1//putative neurofilament medium polypeptide-like isoform 10 [Scophthalmus maximus]
SMAX5B_016205	CP026249.1	21241714..21253916	8.17544	6.0805	67.6725	4.43021e-05	0.00396886	0.765585	protein_coding	K04679//MAD, mothers against decapentaplegic interacting protein	AWP04745.1//putative protein FAM151A-like [Scophthalmus maximus]
SMAX5B_020675	CP026262.1	complement(4001407..4002482)	24.4054	5.68821	51.561	4.1518e-08	1.50156e-05	0.000717473	protein_coding	NA	AWP19656.1//putative sentrin-specific protease 2-like, partial [Scophthalmus maximus]
SMAX5B_011310	CP026250.1	8941651..8947472	1.78015	4.43919	21.6935	0.000769429	0.0281546	1	protein_coding	K18684//hydroperoxy icosatetraenoate dehydratase/isomerase [EC:4.2.1.152 5.4.4.7]	XP_033479292.1//arachidonate 12-lipoxygenase, 12R-type-like [Epinephelus lanceolatus]
SMAX5B_007523	CP026250.1	17191544..17193934	1.67207	4.35795	20.5057	0.00267902	0.0615667	1	protein_coding	K18631//tektin-4	XP_035492608.1//tektin-4 isoform X2 [Scophthalmus maximus]
SMAX5B_001620	CP026250.1	complement(18372159..18374953)	2.23162	4.02096	16.2342	0.00182489	0.0490794	1	protein_coding	K19928//zona pellucida sperm-binding protein 3	AWP06155.1//putative zona pellucida sperm-binding protein 3-like isoform 2 [Scophthalmus maximus]
SMAX5B_009038	CP026259.1	3847510..3850396	4.68661	3.94758	15.4291	0.00044511	0.0201289	1	protein_coding	K14689//solute carrier family 30 (zinc transporter), member 2	XP_035467407.1//zinc transporter 2-like [Scophthalmus maximus]
SMAX5B_011910	CP026243.1	complement(24865510..24872097)	1.23709	3.64118	12.4769	0.000141007	0.00925093	1	protein_coding	K04179//C-C chemokine receptor type 4	AWO96916.1//Chemokine receptor 5 [Scophthalmus maximus]
SMAX5B_019070	CP026255.1	15266562..15271397	0.813677	3.55237	11.732	0.00844799	0.123441	1	protein_coding	K14752//docking protein 1;K20234//docking protein 2	AWP12292.1//putative docking protein 3 [Scophthalmus maximus]
SMAX5B_001167	CP026256.1	19834936..19836969	2.90557	3.47017	11.0822	0.000292558	0.0152013	1	protein_coding	NA	AWP13564.1//wu:fc46h12 precursor [Scophthalmus maximus]
SMAX5B_009377	CP026255.1	7684353..7686655	6.29613	3.45758	10.9859	0.00129329	0.0399688	1	protein_coding	NA	AWP11826.1//Hypothetical protein SMAX5B_009377 [Scophthalmus maximus]
SMAX5B_002496	CP026255.1	complement(11846546..11848138)	1.3436	3.45409	10.9594	0.00818357	0.121133	1	protein_coding	K15049//endonuclease domain-containing 1 protein	AWP12038.1//putative endonuclease domain-containing 1 protein-like [Scophthalmus maximus]
SMAX5B_017367	CP026260.1	15038063..15039832	428.546	3.42228	10.7204	1.70334e-19	5.53161e-16	2.94355e-15	protein_coding	K08270//DNA-damage-inducible transcript 4	XP_035467799.1//DNA damage-inducible transcript 4 protein [Scophthalmus maximus]
SMAX5B_009321	CP026255.1	6197822..6203599	2.80471	3.28889	9.77359	1.57156e-05	0.00175988	0.271582	protein_coding	K23097//R-spondin 2;K23098//R-spondin 3	XP_035505252.1//spondin-2b [Scophthalmus maximus]
SMAX5B_000907	CP026243.1	complement(6429093..6457357)	32.542	3.23387	9.40786	5.78037e-14	8.343e-11	9.98906e-10	protein_coding	K16802//centrosomal protein CEP70;K13194//double stranded RNA-specific editase B [EC:3.5.-.-]	AWO95839.1//putative double-stranded RNA-specific editase 1 [Scophthalmus maximus]
SMAX5B_017746	CP026257.1	19653637..19683151	1.59477	3.21795	9.30461	0.000443712	0.0201289	1	protein_coding	K12232//E3 ubiquitin-protein ligase HECTD2 [EC:2.3.2.26]	XP_026165540.1//probable E3 ubiquitin-protein ligase HECTD2 [Mastacembelus armatus]
SMAX5B_010475	CP026251.1	17278235..17280095	2.44836	3.10863	8.62563	0.000286828	0.0149634	1	protein_coding	K04261//prostaglandin E receptor 4	XP_035496505.1//prostaglandin E receptor 4 (subtype EP4) a [Scophthalmus maximus]
SMAX5B_000467	CP026259.1	complement(11897092..11901459)	0.608318	3.09668	8.55451	0.00456459	#N/A	1	protein_coding	K20839//ribosomal protein S6 kinase-like	AWP16603.1//putative ribosomal protein S6 kinase-like 1 [Scophthalmus maximus]
SMAX5B_012124	CP026243.1	complement(20883358..20887072)	3.5915	2.94878	7.72098	0.000353897	0.0170897	1	protein_coding	K22190//membrane-spanning 4-domains subfamily A member 3/4/8/12/15/18;K06466//B-lymphocyte antigen CD20	XP_028281366.1//B-lymphocyte antigen CD20-like isoform X2 [Parambassis ranga]
SMAX5B_012876	CP026246.1	complement(27185710..27206313)	2.19087	2.9217	7.57738	3.61438e-05	0.00345667	0.6246	protein_coding	K06087//claudin;K04812//nicotinic acetylcholine receptor beta-1	AWP00833.1//putative acetylcholine receptor subunit beta-like [Scophthalmus maximus]
SMAX5B_012098	CP026243.1	20886422..20889866	3.10351	2.90885	7.51019	3.35378e-05	0.00327561	0.579566	protein_coding	K22190//membrane-spanning 4-domains subfamily A member 3/4/8/12/15/18	AWO96712.1//putative membrane-spanning 4-domains subfamily A member 4A isoform 3 [Scophthalmus maximus]
SMAX5B_013004	CP026250.1	1640206..1663287	1.38776	2.87309	7.32634	6.4021e-05	0.0052304	1	protein_coding	K06467//CD22 antigen	AWP05155.1//putative B-cell receptor CD22-like [Scophthalmus maximus]
SMAX5B_004011	CP026246.1	14070115..14075587	12.9915	2.83425	7.13174	1.23051e-14	2.28348e-11	2.12645e-10	protein_coding	K07970//beta-1,3-N-acetylglucosaminyltransferase 3 [EC:2.4.1.146 2.4.1.149]	XP_005454036.2//N-acetyllactosaminide beta-1,3-N-acetylglucosaminyltransferase 3 isoform X1 [Oreochromis niloticus]
SMAX5B_018794	CP026251.1	956677..957559	1705.85	2.7796	6.86661	4.16135e-08	1.50156e-05	0.000719124	protein_coding	K07818//perforin 1	AWP06479.1//C2 domain protein [Scophthalmus maximus]
SMAX5B_020195	CP026260.1	complement(10517883..10519726)	9.65434	2.7279	6.62488	9.63554e-06	0.00120423	0.166512	protein_coding	K06255//basement membrane-specific heparan sulfate proteoglycan core protein;K06727//Fc receptor-like protein	AWP17506.1//Hypothetical protein SMAX5B_020195 [Scophthalmus maximus]
SMAX5B_014063	CP026248.1	20562009..20564853	2.28601	2.62958	6.18847	0.00285381	0.0638054	1	protein_coding	K23698	XP_035485928.1//src-like-adapter 2 [Scophthalmus maximus]
SMAX5B_015986	CP026261.1	19521038..19525739	4.86808	2.55302	5.86862	4.56801e-05	0.00406428	0.789398	protein_coding	K07366//GRB2-related adaptor protein 2	XP_035471804.1//GRB2-related adapter protein 2a isoform X3 [Scophthalmus maximus]
SMAX5B_012077	CP026243.1	complement(15959286..15964299)	1.73008	2.54938	5.85382	0.000162278	0.0103333	1	protein_coding	NA	XP_035479885.2//protein THEMIS2 [Scophthalmus maximus]
SMAX5B_019540	CP026253.1	24004347..24021337	1.7786	2.53626	5.80083	1.34246e-06	0.000267133	0.0231991	protein_coding	K06757//neurofascin	AWP10324.1//putative neurofascin-like [Scophthalmus maximus]
SMAX5B_013103	CP026247.1	19968829..19973519	52.4922	2.52109	5.74015	1.67545e-14	2.72052e-11	2.89535e-10	protein_coding	K00078//dihydrodiol dehydrogenase / D-xylose 1-dehydrogenase (NADP) [EC:1.3.1.20 1.1.1.179]	XP_028436856.1//trans-1,2-dihydrobenzene-1,2-diol dehydrogenase-like isoform X1 [Perca flavescens]
SMAX5B_013855	CP026258.1	complement(13704493..13801728)	0.469964	2.50746	5.68619	0.00169519	0.0467115	1	protein_coding	K06247//laminin, gamma 3	AWP15535.1//putative laminin subunit gamma-3-like [Scophthalmus maximus]
SMAX5B_003661	CP026258.1	8071041..8075882	32.4633	2.50565	5.67904	8.24015e-10	5.94664e-07	1.42398e-05	protein_coding	K12382//saposin	AWP15196.1//putative prosaposin-like isoform 3 [Scophthalmus maximus]
SMAX5B_003909	CP026243.1	complement(1380494..1401480)	15.1895	2.46083	5.50534	1.5128e-20	6.55041e-17	2.61426e-16	protein_coding	K23026//LIM domain and actin-binding protein 1;K18626//trichohyalin	AWO95576.1//putative xin actin-binding repeat-containing protein 2-like [Scophthalmus maximus]
SMAX5B_020440	CP026260.1	complement(9349824..9413061)	13.7149	2.41488	5.33275	1.82942e-06	0.000345249	0.0316143	protein_coding	K21958//extracellular serine/threonine protein kinase FAM20C [EC:2.7.11.1]	AWP17420.1//putative extracellular serine/threonine protein kinase FAM20C-like [Scophthalmus maximus]
SMAX5B_010870	CP026251.1	8315752..8318501	10.2305	2.40976	5.31385	7.24295e-08	2.35215e-05	0.00125165	protein_coding	K15689//E3 ubiquitin-protein ligase NEURL3 [EC:2.3.2.27]	AWP06825.1//Ubiquitin protein ligase Neurl3 [Scophthalmus maximus]
SMAX5B_012012	CP026243.1	21609910..21610983	25.3983	2.39868	5.27322	7.26552e-10	5.55171e-07	1.25555e-05	protein_coding	K18617//allograft inflammatory factor 1	XP_035485211.1//allograft inflammatory factor 1-like [Scophthalmus maximus]
SMAX5B_010437	CP026251.1	complement(15666955..15670052)	6.23422	2.38821	5.23509	1.01905e-06	0.000210118	0.0176101	protein_coding	NA	XP_035494681.1//macrophage expressed 1, tandem duplicate 1 [Scophthalmus maximus]
SMAX5B_001166	CP026256.1	complement(19824699..19834328)	11.9265	2.38522	5.22425	2.51311e-06	0.00041853	0.0434291	protein_coding	K17513//C-type lectin superfamily 17 member A;K06721//C-type lectin domain family 10 member A	AWP13563.1//putative CD209 antigen-like protein E [Scophthalmus maximus]
SMAX5B_021582	CP026250.1	complement(938237..943336)	3.17775	2.37583	5.19035	0.000191647	0.0113159	1	protein_coding	K06083//WAS protein family, member 3;K05748//WAS protein family, member 2	XP_018530187.1// wiskott-Aldrich syndrome protein family member 3-like [Lates calcarifer]
SMAX5B_001444	CP026244.1	complement(5762760..5768189)	1.0637	2.35855	5.12854	0.00508839	0.0923159	1	protein_coding	K05698//receptor-type tyrosine-protein phosphatase eta [EC:3.1.3.48]	AWO97601.1//putative receptor-type tyrosine-protein phosphatase beta-like [Scophthalmus maximus]
SMAX5B_022288	CP026254.1	complement(14062228..14068866)	1.84003	2.3076	4.95058	0.000535362	0.0223612	1	protein_coding	K06494//selectin, endothelial cell	XP_035502827.1//E-selectin-like isoform X1 [Scophthalmus maximus]
SMAX5B_021981	CP026259.1	6240233..6242723	13.6998	2.26733	4.8143	5.54534e-06	0.00080937	0.0958289	protein_coding	K20284//Rab GTPase-activating protein 1	AWP16284.1//putative rab GTPase-activating protein 1-like [Scophthalmus maximus]
SMAX5B_015715	CP026264.1	8779777..8781787	2.47269	2.25959	4.78856	0.000576947	0.0231525	1	protein_coding	NA	AWP21675.1//putative receptor-transporting protein 4 [Scophthalmus maximus]
SMAX5B_008234	CP026262.1	complement(4409213..4419033)	13.292	2.24864	4.75236	6.59846e-09	3.45625e-06	0.000114028	protein_coding	K10431//microtubule-associated protein 4	AWP19683.1//putative zinc finger protein 395 [Scophthalmus maximus]
SMAX5B_010386	CP026251.1	18056521..18058541	1.95752	2.24863	4.75233	0.00659479	0.106023	1	protein_coding	NA	AWP07375.1//putative prostate stem cell antigen-like [Scophthalmus maximus]
SMAX5B_008010	CP026244.1	3433119..3438071	63.7107	2.24292	4.73355	7.60759e-12	8.98387e-09	1.31467e-07	protein_coding	K05759//profilin	XP_035464922.1//profilin-1 [Scophthalmus maximus]
SMAX5B_005185	CP026248.1	complement(8916944..8941350)	1.49628	2.23961	4.72268	2.31502e-05	0.00244489	0.400058	protein_coding	K20634//Rho GTPase-activating protein 9	AWP02555.1//putative rho GTPase-activating protein 9 [Scophthalmus maximus]
SMAX5B_021967	CP026259.1	5166613..5173719	8.72264	2.23915	4.7212	1.8551e-05	0.00204218	0.32058	protein_coding	K17275//plastin-1	XP_035465956.1//plastin-1 [Scophthalmus maximus]
SMAX5B_022001	CP026259.1	6243390..6247266	16.1558	2.23337	4.7023	3.47204e-06	0.000556813	0.0600003	protein_coding	K05059//ciliary neurotrophic factor receptor;K05056//interleukin 11 receptor alpha	AWP16285.1//putative interleukin-27 subunit beta [Scophthalmus maximus]
SMAX5B_010613	CP026244.1	complement(3255032..3260230)	4.45829	2.23278	4.70038	0.000606509	0.023929	1	protein_coding	K17260//actin-related protein 2	XP_017293732.1//actin-related protein 2-like [Kryptolebias marmoratus]
SMAX5B_016702	CP026260.1	4642191..4654255	36.3742	2.19552	4.58053	6.47825e-17	1.68305e-13	1.11951e-12	protein_coding	K07375//tubulin beta;K18406//tudor domain-containing protein 2	AWP17200.1//putative tudor and KH domain-containing protein isoform 4 [Scophthalmus maximus]
SMAX5B_001947	CP026263.1	complement(2739419..2748825)	19.8793	2.17631	4.51996	2.27657e-15	4.92876e-12	3.93413e-11	protein_coding	K05092//fms-related tyrosine kinase 3 [EC:2.7.10.1]	AWP20663.1//putative receptor-type tyrosine-protein kinase FLT3 [Scophthalmus maximus]
SMAX5B_019114	CP026255.1	complement(18193703..18196670)	2.24898	2.16964	4.4991	0.00308328	0.0675408	1	protein_coding	K21125//mucin-5AC	AWP12430.1//putative platelet-derived growth factor receptor-like protein [Scophthalmus maximus]
SMAX5B_013269	CP026256.1	21899453..21916142	0.78669	2.16743	4.49221	0.00846937	0.123487	1	protein_coding	K08808//protein serine kinase H [EC:2.7.11.1];K16462//centrosomal protein CEP164;K21754//BTB/POZ domain-containing protein KCTD1/15;K09291//nucleoprotein TPR;K23781;K04946//potassium channel subfamily T member 1;K20478//golgin subfamily B member 1	XP_035507138.1//ecto-NOX disulfide-thiol exchanger 1 [Scophthalmus maximus]
SMAX5B_008836	CP026255.1	12947161..12956702	1.63147	2.16695	4.49073	7.09274e-05	0.00565243	1	protein_coding	K23116//hepatocyte cell adhesion molecule;K12375//arylsulfatase I/J [EC:3.1.6.-]	AWP12139.1//putative arylsulfatase I [Scophthalmus maximus]
SMAX5B_002478	CP026255.1	11935439..11942536	5.8881	2.13706	4.39866	2.17386e-06	0.000386827	0.0375664	protein_coding	K08230//MFS transporter, LAT3 family, solute carrier family 43, member 3	AWP12047.1//putative solute carrier family 43 member 3 [Scophthalmus maximus]
SMAX5B_000798	CP026249.1	complement(19396965..19423067)	54.709	2.12521	4.36267	1.68944e-09	1.04504e-06	2.91951e-05	protein_coding	K00207//dihydropyrimidine dehydrogenase (NADP+) [EC:1.3.1.2]	AWP04652.1//putative dihydropyrimidine dehydrogenase [Scophthalmus maximus]
SMAX5B_004462	CP026244.1	1308412..1314222	3.63347	2.11333	4.32688	0.00399527	0.0791136	1	protein_coding	K00512//steroid 17alpha-monooxygenase / 17alpha-hydroxyprogesterone deacetylase [EC:1.14.14.19 1.14.14.32]	AWO97316.1//CYP17II 17-alpha-hydroxylase [Scophthalmus maximus]
SMAX5B_016704	CP026260.1	complement(4301066..4303716)	3.37436	2.10444	4.30032	0.00338122	0.0705452	1	protein_coding	K07437//cytochrome P450 family 26 subfamily A	AWP17174.1//putative cytochrome P450 26A1 [Scophthalmus maximus]
SMAX5B_001434	CP026244.1	complement(5414319..5426580)	2.29858	2.09892	4.28387	1.29344e-05	0.00151368	0.22352	protein_coding	K08878//breakpoint cluster region protein [EC:2.7.11.1]	XP_035507232.1//active breakpoint cluster region-related protein isoform X4 [Scophthalmus maximus]
SMAX5B_013971	CP026258.1	15046984..15056010	5.20693	2.0917	4.2625	1.54209e-05	0.00174189	0.266488	protein_coding	K22630//interleukin 31 receptor subunit alpha	AWP15568.1//putative interleukin-31 receptor subunit alpha-like [Scophthalmus maximus]
SMAX5B_021029	CP026261.1	12573353..12576445	3.65126	2.08153	4.23257	0.00280275	0.063208	1	protein_coding	K06553//pre-B lymphocyte gene;K10784//T cell receptor alpha chain V region;K06554//immunoglobulin lambda-like polypeptide 1	AWP19006.1//putative Ig heavy chain Mem5-like [Scophthalmus maximus]
SMAX5B_004762	CP026256.1	complement(20660683..20668346)	28.2221	2.0639	4.18116	3.77153e-12	4.89922e-09	6.51758e-08	protein_coding	K17276//plastin-2	AWP13597.1//putative plastin-2 [Scophthalmus maximus]
SMAX5B_021023	CP026261.1	13949010..13952031	1.19064	2.05971	4.16903	0.00867872	0.125767	1	protein_coding	K08387//P2Y purinoceptor 11;K14859//ribosome biogenesis protein SSF1/2	AWP19106.1//putative P2Y purinoceptor 11 [Scophthalmus maximus]
SMAX5B_013940	CP026258.1	13909980..14002703	4.69963	2.05678	4.16057	0.000132529	0.00873881	1	protein_coding	K10955//mucin-2;K10104//ficolin;K06252//tenascin	XP_035236347.1//fibrinogen C domain-containing protein 1-like [Anguilla anguilla]
SMAX5B_018912	CP026245.1	complement(22970191..22975107)	20.1006	2.05187	4.14643	2.9732e-08	1.17036e-05	0.000513799	protein_coding	K01166//ribonuclease T2 [EC:4.6.1.19]	AWO99463.1//putative ribonuclease T2-like [Scophthalmus maximus]
SMAX5B_005293	CP026258.1	20910884..20911393	11.1294	2.05095	4.14377	0.000434165	0.0198585	1	protein_coding	K03096//frequently rearranged in advanced T-cell lymphomas 2	XP_035463530.1//glycogen synthase kinase binding protein [Scophthalmus maximus]
SMAX5B_015339	CP026255.1	complement(21087173..21099129)	149.242	2.04	4.11246	2.89038e-05	0.00291055	0.499487	protein_coding	K18764//nocturnin [EC:3.1.13.4]	AWP12557.1//putative nocturnin [Scophthalmus maximus]
SMAX5B_015732	CP026264.1	complement(5485697..5487277)	252.226	2.03599	4.10105	0.000445212	0.0201289	1	protein_coding	K08760//apolipoprotein A-IV	AWP21467.1//putative apolipoprotein A-IV-like [Scophthalmus maximus]
SMAX5B_018780	CP026251.1	complement(1391420..1398857)	1.93198	2.02675	4.07486	0.00477535	0.0887436	1	protein_coding	K01509//adenosinetriphosphatase [EC:3.6.1.3]	AWP06502.1//putative ectonucleoside triphosphate diphosphohydrolase 2-like [Scophthalmus maximus]
SMAX5B_008705	CP026257.1	complement(13418794..13447392)	10.0842	1.95573	3.87912	8.94989e-10	6.1189e-07	1.54663e-05	protein_coding	K23573//dentin sialophosphoprotein;K13172//serine/arginine repetitive matrix protein 2;K14317//nuclear pore complex protein Nup214	AWP14382.1//putative protein very KIND [Scophthalmus maximus]
SMAX5B_013323	CP026245.1	14368461..14377087	195.478	1.95228	3.86986	1.91907e-07	5.0875e-05	0.00331635	protein_coding	K13883//Rab-interacting lysosomal protein	XP_035479227.1//RILP-like protein 1 isoform X3 [Scophthalmus maximus]
SMAX5B_008201	CP026262.1	9082001..9084089	11.5765	1.94045	3.83825	0.00215383	0.0544324	1	protein_coding	K09627//serine protease 23 [EC:3.4.21.-]	AWP19874.1//putative inactive serine protease 35 [Scophthalmus maximus]
SMAX5B_011227	CP026261.1	complement(16644317..16653050)	25.6143	1.93925	3.83506	2.30154e-11	2.49141e-08	3.97728e-07	protein_coding	K13882//coronin-1A	XP_023269519.1//coronin-1A-like isoform X1 [Seriola lalandi dorsalis]
SMAX5B_020732	CP026261.1	complement(9855634..9859790)	4.31942	1.93745	3.83027	0.00134959	0.0408651	1	protein_coding	K06457//T-cell surface glycoprotein CD7	XP_030262504.1//T-cell antigen CD7-like isoform X2 [Sparus aurata]
SMAX5B_015617	CP026264.1	complement(6408836..6410185)	3.13931	1.9236	3.79368	0.00254456	0.0601713	1	protein_coding	K01771//1-phosphatidylinositol phosphodiesterase [EC:4.6.1.13]	XP_035477225.1//1-phosphatidylinositol phosphodiesterase [Scophthalmus maximus]
SMAX5B_020724	CP026261.1	12230096..12232387	10.2685	1.90652	3.74903	3.67311e-06	0.000574864	0.063475	protein_coding	K17300//galectin-3-binding protein	XP_035471031.1//galectin-3-binding protein A-like [Scophthalmus maximus]
SMAX5B_013175	CP026247.1	18499160..18503777	3.90873	1.89698	3.72433	0.000805766	0.0288349	1	protein_coding	K12804//proline-serine-threonine phosphatase interacting protein 1	XP_035484496.1//proline-serine-threonine phosphatase-interacting protein 1-like [Scophthalmus maximus]
SMAX5B_021703	CP026256.1	2523439..2535792	134.946	1.89656	3.72324	1.02276e-07	3.16324e-05	0.00176743	protein_coding	K09275//transcription factor CP2 and related proteins	XP_035507069.1//transcription factor CP2-like protein 1 isoform X2 [Scophthalmus maximus]
SMAX5B_014103	CP026248.1	complement(17391312..17393134)	1.76459	1.87143	3.65894	0.0058611	0.0996993	1	protein_coding	K06721//C-type lectin domain family 10 member A	AWP03145.1//Hypothetical protein SMAX5B_014103 [Scophthalmus maximus]
SMAX5B_020801	CP026261.1	8914089..8950984	7.76457	1.86869	3.65202	0.000380314	0.0179647	1	protein_coding	K17341//hemicentin;K06856//immunoglobulin heavy chain	AWP18761.1//immunoglobulin heavy chain secretory form isoform 11 [Scophthalmus maximus]
SMAX5B_006423	CP026249.1	complement(2787840..2792875)	2.18804	1.86759	3.64924	0.000182587	0.0109806	1	protein_coding	K06733//SLAM family member 7;K13912//deleted in malignant brain tumors 1 protein;K06511//CD84 antigen	AWP03661.1//putative SLAM family member 9-like [Scophthalmus maximus]
SMAX5B_007866	CP026254.1	complement(21203249..21212569)	17.6953	1.86227	3.63579	1.15199e-08	5.02495e-06	0.000199075	protein_coding	K02561//Bcl-2-related ovarian killer protein	XP_035504414.1//bcl-2-related ovarian killer protein homolog A [Scophthalmus maximus]
SMAX5B_009153	CP026264.1	10564548..10565627	120.367	1.86163	3.63418	0.00138755	0.0418197	1	protein_coding	K06721//C-type lectin domain family 10 member A;K17513//C-type lectin superfamily 17 member A	AWP21791.1//putative lactose-binding lectin l-2-like
SMAX5B_019748	CP026244.1	complement(187048..199287)	18.3117	1.86075	3.63198	1.31658e-09	8.55117e-07	2.27518e-05	protein_coding	K08042//adenylate cyclase 2 [EC:4.6.1.1];K08044//adenylate cyclase 4 [EC:4.6.1.1]	AWO97206.1//putative adenylate cyclase type 4-like [Scophthalmus maximus]
SMAX5B_009194	CP026245.1	10908089..10912499	3.07574	1.85257	3.61143	0.000184607	0.0110509	1	protein_coding	K20368//protein cornichon;K23573//dentin sialophosphoprotein;K19607//X-linked retinitis pigmentosa GTPase regulator;K15174//RNA polymerase II-associated factor 1	AWO98870.1//putative glia maturation factor gamma-like isoform 6 [Scophthalmus maximus]
SMAX5B_015679	CP026264.1	5488476..5489799	539.294	1.8525	3.61126	0.00245318	0.0590125	1	protein_coding	K08760//apolipoprotein A-IV	XP_035476766.1//apolipoprotein A-I-like [Scophthalmus maximus]
SMAX5B_001938	CP026250.1	20728920..20736550	2.68519	1.84882	3.60206	0.00108206	0.0354949	1	protein_coding	K09228//KRAB domain-containing zinc finger protein;K09220//IKAROS family zinc finger protein	XP_023269439.1//zinc finger protein Aiolos-like [Seriola lalandi dorsalis]
SMAX5B_011552	CP026250.1	complement(10121548..10125615)	0.871727	1.8476	3.59902	0.00271652	0.0620772	1	protein_coding	K21125//mucin-5AC	AWP05582.1//DUF4585 domain containing protein [Scophthalmus maximus]
SMAX5B_015890	CP026264.1	complement(5481705..5484029)	4533.8	1.84521	3.59306	7.65311e-07	0.0001712	0.0132253	protein_coding	K04524//apolipoprotein E	AWP21466.1//putative apolipoprotein Eb-like [Scophthalmus maximus]
SMAX5B_006071	CP026249.1	complement(3894331..3906182)	5.90534	1.84061	3.58162	0.00022972	0.0128624	1	protein_coding	K01895//acetyl-CoA synthetase [EC:6.2.1.1]	XP_035491652.1//acyl-CoA synthetase short chain family member 2 like isoform X1 [Scophthalmus maximus]
SMAX5B_005297	CP026258.1	complement(20892286..20899592)	28.8239	1.83566	3.56935	3.70003e-05	0.0034578	0.639403	protein_coding	K06237//collagen, type IV, alpha;K06890//uncharacterized protein	AWP15837.1//Hypothetical protein SMAX5B_005297 [Scophthalmus maximus]
SMAX5B_022222	CP026254.1	complement(7197872..7211162)	4.11926	1.83239	3.56127	1.02185e-07	3.16324e-05	0.00176586	protein_coding	K10356//myosin I	XP_022615793.1//unconventional myosin-If-like [Seriola dumerili]
SMAX5B_006180	CP026261.1	6327920..6334212	8.47741	1.82495	3.54294	3.9831e-05	0.003677	0.68832	protein_coding	K10955//mucin-2;K04557//septin 5;K21125//mucin-5AC	XP_035471390.1//phospholipase B-like 1 [Scophthalmus maximus]
SMAX5B_012478	CP026247.1	complement(10803629..10810145)	7.95739	1.82271	3.53745	9.75887e-07	0.000204464	0.0168643	protein_coding	K09438//transcription factor PU.1	AWP01486.1//Transcription factor PU.1 [Scophthalmus maximus]
SMAX5B_021646	CP026256.1	complement(1458958..1471824)	3.68453	1.80068	3.48385	3.21115e-05	0.00320868	0.554918	protein_coding	K11222//signal transducer and activator of transcription 4	XP_022595924.1//signal transducer and activator of transcription 4 isoform X2 [Seriola dumerili]
SMAX5B_012667	CP026247.1	complement(14374679..14382086)	3.09891	1.7881	3.45359	0.00735142	0.11382	1	protein_coding	K17342//fibulin 7	XP_035484461.1//fibulin-7 [Scophthalmus maximus]
SMAX5B_016551	CP026255.1	1025596..1036885	299.492	1.77692	3.42693	1.52209e-07	4.35292e-05	0.00263032	protein_coding	K15124//solute carrier family 25, member 48	XP_035506120.1//solute carrier family 25 member 48 [Scophthalmus maximus]
SMAX5B_006976	CP026243.1	complement(9473476..9474340)	14.0988	1.77474	3.42177	0.0016104	0.0455504	1	protein_coding	NA	AWO95971.1//Hypothetical protein SMAX5B_006976 [Scophthalmus maximus]
SMAX5B_011999	CP026243.1	17965376..17972311	8.02493	1.77266	3.41683	1.1759e-06	0.000238671	0.0203207	protein_coding	K17515//C-type lectin domain family 9 member A;K10059//C-type lectin domain family 4 member E;K08341//GABA(A) receptor-associated protein;K06502//CD69 antigen	XP_035498545.1//C-type lectin domain family 9 member A isoform X1 [Scophthalmus maximus]
SMAX5B_010000	CP026252.1	complement(10832661..10835345)	3.90967	1.75978	3.38646	0.000500042	0.0214374	1	protein_coding	K09438//transcription factor PU.1	XP_035498321.1//transcription factor PU.1a isoform X2 [Scophthalmus maximus]
SMAX5B_001769	CP026263.1	7462557..7467437	11.9988	1.75634	3.37839	0.00214114	0.0543139	1	protein_coding	K15281//solute carrier family 35	AWP20872.1//putative transmembrane protein 241 [Scophthalmus maximus]
SMAX5B_004359	CP026246.1	26173770..26179916	8.98496	1.75161	3.36735	3.2834e-05	0.00323705	0.567404	protein_coding	K07983//high affinity immunoglobulin epsilon receptor subunit gamma	XP_035481525.1//high affinity immunoglobulin epsilon receptor subunit gamma [Scophthalmus maximus]
SMAX5B_003694	CP026243.1	15314372..15328553	2.67053	1.7506	3.36498	7.19003e-05	0.00569503	1	protein_coding	K06467//CD22 antigen	AWO96238.1//putative B-cell receptor CD22-like [Scophthalmus maximus]
SMAX5B_016048	CP026261.1	complement(19693121..19714808)	0.522058	1.74436	3.35046	0.00825858	0.121769	1	protein_coding	K10352//myosin heavy chain	XP_034750050.1//myosin-11-like isoform X2 [Etheostoma cragini]
SMAX5B_012116	CP026243.1	complement(21745153..21803567)	0.795267	1.74427	3.35025	0.00394418	0.078553	1	protein_coding	K16680//echinoid;K12567//titin [EC:2.7.11.1];K13362//FXYD domain-containing ion transport regulator 5;K06768//Down syndrome cell adhesion molecule-like protein 1	AWO96788.1//putative nephrin [Scophthalmus maximus]
SMAX5B_009641	CP026264.1	11900564..11919079	14.0704	1.73516	3.32917	7.90013e-05	0.00596644	1	protein_coding	K09047//cyclic AMP-responsive element-binding protein 5	AWP21861.1//putative cyclic AMP-responsive element-binding protein 5-like isoform 2 [Scophthalmus maximus]
SMAX5B_005738	CP026249.1	complement(2941417..2945594)	10.2821	1.73239	3.32277	6.14919e-06	0.00087778	0.106264	protein_coding	K07983//high affinity immunoglobulin epsilon receptor subunit gamma	AWP03678.1//putative high affinity immunoglobulin epsilon receptor subunit gamma-like isoform 3 [Scophthalmus maximus]
SMAX5B_022620	CP026254.1	14091367..14098634	1.1698	1.71066	3.27311	0.00468696	0.0874764	1	protein_coding	K05760//paxillin	XP_035502508.1//leupaxin isoform X1 [Scophthalmus maximus]
SMAX5B_018191	CP026256.1	complement(16422330..16440041)	1.28159	1.7023	3.2542	0.000953035	0.032538	1	protein_coding	K23573//dentin sialophosphoprotein;K16580//SLAIN motif-containing protein 1/2	AWP13394.1//putative SLAIN motif-containing protein 1-like [Scophthalmus maximus]
SMAX5B_003999	CP026246.1	12279405..12281077	13.1963	1.68885	3.22399	0.000100114	0.007185	1	protein_coding	NA	XP_035480837.1//X-ray radiation resistance-associated protein 1 isoform X1 [Scophthalmus maximus]
SMAX5B_014742	CP026253.1	9715383..9724055	259.926	1.684	3.21318	0.00046117	0.0202752	1	protein_coding	K01311//chymotrypsin C [EC:3.4.21.2]	AWP09466.1//putative transmembrane protease serine 9-like [Scophthalmus maximus]
SMAX5B_011595	CP026250.1	complement(3683308..3687890)	4.26649	1.67501	3.19322	0.000978795	0.0331972	1	protein_coding	K22614//NLR family CARD domain-containing protein 3	AWP05253.1//putative NACHT LRR and PYD domains-containing protein 10-like [Scophthalmus maximus]
SMAX5B_021737	CP026249.1	17919728..17982713	3.12418	1.6726	3.18788	5.2322e-05	0.00447147	0.904177	protein_coding	K08647//pappalysin-2 [EC:3.4.24.-]	AWP04620.1//putative pappalysin-2 [Scophthalmus maximus]
SMAX5B_016469	CP026251.1	12938009..12940211	3.01181	1.66648	3.17438	0.00163754	0.0457454	1	protein_coding	K04245//chemokine-like receptor 1	AWP07096.1//putative chemokine-like receptor 1 [Scophthalmus maximus]
SMAX5B_022282	CP026254.1	7288726..7300694	389.324	1.66458	3.17021	3.15561e-07	7.88297e-05	0.00545322	protein_coding	K04372//MAP kinase interacting serine/threonine kinase [EC:2.7.11.1]	XP_035502607.1//MAP kinase-interacting serine/threonine-protein kinase 2b [Scophthalmus maximus]
SMAX5B_012817	CP026252.1	18575844..18635851	2.63523	1.65926	3.15854	0.0015318	0.0442788	1	protein_coding	K10483//BTB/POZ domain-containing protein 11	XP_018519764.1//PREDICTED: ankyrin repeat and BTB/POZ domain-containing protein BTBD11-B-like isoform X1 [Lates calcarifer]
SMAX5B_012765	CP026244.1	10826627..10842899	2.70458	1.65542	3.15015	2.37333e-06	0.000400383	0.0410134	protein_coding	K06572//plexin C	XP_035466892.1//plexin-C1 [Scophthalmus maximus]
SMAX5B_019386	CP026246.1	7682044..7683458	10.6057	1.65271	3.14423	0.00296272	0.0656753	1	protein_coding	K18496//fibroblast growth factor 1	XP_035481114.1// fibroblast growth factor 1-like [Scophthalmus maximus]
SMAX5B_022032	CP026243.1	10113256..10117543	2.29695	1.64967	3.13762	0.00379897	0.0761553	1	protein_coding	K06707//B- and T-lymphocyte attenuator	AWO96011.1//putative B- and T-lymphocyte attenuator-like [Scophthalmus maximus]
SMAX5B_005097	CP026252.1	complement(6718328..6719106)	29.5542	1.64831	3.13466	1.07523e-05	0.0012814	0.185811	protein_coding	K09993//cyclin-dependent kinase inhibitor 1C	XP_035499537.1//cyclin-dependent kinase inhibitor 1C-like [Scophthalmus maximus]
SMAX5B_018992	CP026255.1	complement(1933667..1945591)	1600.02	1.64096	3.11874	1.40541e-07	4.14915e-05	0.00242869	protein_coding	K10104//ficolin	AWP11638.1//Microfibril-associated glycoprotein 4 [Scophthalmus maximus]
SMAX5B_013798	CP026258.1	complement(12396405..12405290)	3.06476	1.63937	3.1153	0.000518408	0.0219352	1	protein_coding	K20124//proline-serine-threonine phosphatase interacting protein 2	AWP15438.1//putative proline-serine-threonine phosphatase-interacting protein 2 isoform 2 [Scophthalmus maximus]
SMAX5B_019669	CP026262.1	14158867..14166864	2.4768	1.62914	3.09328	0.000198961	0.0115148	1	protein_coding	K20654//T-cell activation Rho GTPase-activating protein	AWP20192.1//putative T-cell activation Rho GTPase-activating protein [Scophthalmus maximus]
SMAX5B_008363	CP026249.1	1101787..1106160	7.97848	1.62432	3.08296	1.49542e-05	0.00170995	0.258423	protein_coding	K12196//vacuolar protein-sorting-associated protein 4	XP_033505390.1//protein FAM49B-like isoform X1 [Epinephelus lanceolatus]
SMAX5B_019080	CP026255.1	5240018..5245176	4.54343	1.62051	3.07484	0.00129375	0.0399688	1	protein_coding	K10327//ankyrin repeat and SOCS box protein 5	XP_035506513.1//ankyrin repeat and SOCS box protein 5 isoform X1 [Scophthalmus maximus]
SMAX5B_001490	CP026244.1	5345633..5354738	84.0511	1.61778	3.06902	4.25121e-07	0.000104195	0.00734651	protein_coding	K21944//period circadian protein 1	XP_035477356.1//period circadian protein homolog 1b isoform X1 [Scophthalmus maximus]
SMAX5B_018069	CP026257.1	7712251..7716076	4.50079	1.6126	3.05802	0.000706229	0.0264027	1	protein_coding	K01348//urokinase plasminogen activator [EC:3.4.21.73]	AWP14081.1//putative tissue-type plasminogen activator-like [Scophthalmus maximus]
SMAX5B_012067	CP026243.1	17684953..17698805	7.31359	1.57926	2.98817	9.47551e-06	0.00120423	0.163746	protein_coding	K05697//tyrosine-protein phosphatase non-receptor type 6 [EC:3.1.3.48]	AWO96396.1//Protein-tyrosine-phosphatase isoform 3 [Scophthalmus maximus]
SMAX5B_020394	CP026260.1	8617643..8627990	3.66399	1.57687	2.98321	0.00027	0.0143742	1	protein_coding	K20652//SH3-domain binding protein 1	AWP17371.1//putative SH3 domain-binding protein 1-like [Scophthalmus maximus]
SMAX5B_011705	CP026243.1	complement(26124732..26131733)	19.4891	1.57473	2.9788	4.45666e-07	0.000107207	0.00770155	protein_coding	K01015//alcohol sulfotransferase [EC:2.8.2.2]	XP_035485761.1//sulfotransferase family 2, cytosolic sulfotransferase 3 isoform X1 [Scophthalmus maximus]
SMAX5B_011379	CP026250.1	2826744..2832214	10.9089	1.566	2.96083	0.00418066	0.081176	1	protein_coding	K07860//Ras-related C3 botulinum toxin substrate 2;K04392//Ras-related C3 botulinum toxin substrate 1	AWP05203.1//Ras-like protein Rac2 [Scophthalmus maximus]
SMAX5B_000079	CP026262.1	complement(17741332..17746644)	16.4045	1.56156	2.95173	0.000234642	0.0130816	1	protein_coding	K16600//tubulin polyglutamylase TTLL2 [EC:6.-.-.-];K23573//dentin sialophosphoprotein;K22016//mucin-3/17	AWP20367.1//putative protein unc-93 -like A-like [Scophthalmus maximus]
SMAX5B_009515	CP026249.1	38601..55236	17.5548	1.55212	2.93247	2.87118e-09	1.62159e-06	4.96169e-05	protein_coding	K12562//amphiphysin	XP_035490993.1//amphiphysin [Scophthalmus maximus]
SMAX5B_011959	CP026243.1	complement(22009374..22013356)	3.16915	1.54847	2.92506	0.00393009	0.0784208	1	protein_coding	K06771//myelin associated glycoprotein	AWO96813.1//putative sialoadhesin-like [Scophthalmus maximus]
SMAX5B_000440	CP026259.1	complement(10953973..10975827)	38.83	1.53878	2.9055	1.8909e-06	0.000345954	0.0326766	protein_coding	K17581//consortin	AWP16541.1//putative nutritionally-regulated adipose and cardiac enriched protein -like [Scophthalmus maximus]
SMAX5B_012136	CP026243.1	19516297..19550335	1.09667	1.53337	2.89461	0.000736823	0.0272688	1	protein_coding	K09878//aquaporin-10;K01530//phospholipid-translocating ATPase [EC:7.6.2.1];K22628//interleukin 16	AWO96591.1//putative phospholipid-transporting ATPase ID (ATPase class I type 8B member 2) [Scophthalmus maximus]
SMAX5B_011834	CP026243.1	complement(18368341..18376968)	32.9763	1.53322	2.89432	1.05363e-08	4.8881e-06	0.000182078	protein_coding	K09057//hepatic leukemia factor	XP_035481523.1//D site albumin promoter binding protein b isoform X2 [Scophthalmus maximus]
SMAX5B_013569	CP026248.1	6136069..6157094	0.969305	1.52782	2.88349	0.00339421	0.0705452	1	protein_coding	K12567//titin [EC:2.7.11.1];K12329//protein phosphatase 1 regulatory subunit 12B	AWP02430.1//putative immunoglobulin-like and fibronectin type III domain-containing protein 1 isoform 2 [Scophthalmus maximus]
SMAX5B_008453	CP026245.1	2214492..2237991	23.1391	1.52755	2.88296	0.000182324	0.0109806	1	protein_coding	K00306//sarcosine oxidase / L-pipecolate oxidase [EC:1.5.3.1 1.5.3.7]	XP_035479407.1//peroxisomal sarcosine oxidase isoform X1 [Scophthalmus maximus]
SMAX5B_002370	CP026248.1	10504588..10508115	2.62007	1.52643	2.88071	0.00604426	0.101069	1	protein_coding	K19289//peripheral myelin protein 22	AWP02613.1//putative epithelial membrane protein 3-like [Scophthalmus maximus]
SMAX5B_010520	CP026251.1	complement(19354034..19356388)	17.612	1.52016	2.86823	2.6838e-05	0.00276686	0.463787	protein_coding	K15214//TATA box-binding protein-associated factor RNA polymerase I subunit C;K02503//histidine triad (HIT) family protein	XP_035495412.1//histidine triad nucleotide-binding protein 2, mitochondrial [Scophthalmus maximus]
SMAX5B_010544	CP026244.1	3287656..3290710	8.18777	1.51863	2.86518	0.00351295	0.071919	1	protein_coding	K11206//deaminated glutathione amidase [EC:3.5.1.128]	AWO97441.1//putative nitrilase -like 1 [Scophthalmus maximus]
SMAX5B_008196	CP026262.1	10141088..10147778	919.345	1.51643	2.86082	0.000312476	0.015794	1	protein_coding	K15789//threonine 3-dehydrogenase [EC:1.1.1.103]	AWP19942.1//L-threonine dehydrogenase [Scophthalmus maximus]
SMAX5B_007422	CP026250.1	complement(16923909..16935022)	1.54242	1.51379	2.85558	0.0027627	0.0626309	1	protein_coding	K20395//CO300B/D/F antigen;K13073//polymeric immunoglobulin receptor	TMS23121.1//CMRF35-like molecule 9 [Larimichthys crocea]
SMAX5B_013017	CP026261.1	complement(263087..284146)	166.697	1.50432	2.83691	8.96338e-06	0.0011881	0.154896	protein_coding	K00898//pyruvate dehydrogenase kinase 2/3/4 [EC:2.7.11.2]	XP_028455130.1//pyruvate dehydrogenase (acetyl-transferring) kinase isozyme 2, mitochondrial-like [Perca flavescens]
SMAX5B_020941	CP026261.1	8646117..8653124	2.13043	1.49986	2.82815	0.00913863	0.129597	1	protein_coding	K22387//lysophospholipase D [EC:3.1.4.39]	XP_035470535.1//lysophospholipase D GDPD3a isoform X1 [Scophthalmus maximus]
SMAX5B_009379	CP026255.1	complement(8817591..8828919)	27.239	1.49669	2.82195	6.01912e-06	0.00086876	0.104016	protein_coding	K19522//membrane transport protein XK	XP_035504863.1//XK-related protein 2 [Scophthalmus maximus]
SMAX5B_016799	CP026257.1	complement(20745547..20753777)	76.8071	1.49377	2.81624	9.07012e-06	0.00119011	0.156741	protein_coding	K03006//DNA-directed RNA polymerase II subunit RPB1 [EC:2.7.7.6]	AWP14682.1//Hypothetical protein SMAX5B_016799 [Scophthalmus maximus]
SMAX5B_007749	CP026244.1	complement(17534286..17537596)	19.8814	1.48689	2.80283	2.02619e-07	5.26404e-05	0.00350146	protein_coding	K09228//KRAB domain-containing zinc finger protein	XP_022605373.1//zinc finger protein interacting with ribonucleoprotein K-like [Seriola dumerili]
SMAX5B_012243	CP026246.1	626740..633300	10.9716	1.4836	2.79646	9.74054e-06	0.00120423	0.168326	protein_coding	K07863//Ras homolog gene family, member G	XP_035480476.1//ras homolog family member Gb [Scophthalmus maximus]
SMAX5B_016013	CP026261.1	19810422..19810853	15.6503	1.48247	2.79426	0.000623619	0.0242539	1	protein_coding	K23573//dentin sialophosphoprotein	XP_038151157.1//grass carp reovirus (GCRV)-induced gene 2e [Cyprinodon tularosa]
SMAX5B_010091	CP026252.1	complement(15620182..15624149)	5.53273	1.47867	2.78691	0.00109038	0.0355946	1	protein_coding	K10873//DNA repair and recombination protein RAD52	AWP08618.1//putative DNA repair protein RAD52 -like [Scophthalmus maximus]
SMAX5B_002139	CP026243.1	66098..67463	599.805	1.4779	2.78543	0.00119826	0.0378471	1	protein_coding	K10655//tripartite motif-containing protein 63 [EC:2.3.2.27]	XP_035480408.1//E3 ubiquitin-protein ligase TRIM63a [Scophthalmus maximus]
SMAX5B_010559	CP026244.1	2895067..2898169	84.2149	1.47396	2.77783	3.50081e-08	1.33752e-05	0.000604975	protein_coding	K06752//MHC class II antigen	AWO97408.1//MHC class II beta antigen [Scophthalmus maximus]
SMAX5B_006772	CP026246.1	6134361..6140492	5.11587	1.47102	2.77219	7.04332e-06	0.000963081	0.121716	protein_coding	K05070//interleukin 2 receptor gamma	XP_035482509.1//cytokine receptor common subunit gamma-like [Scophthalmus maximus]
SMAX5B_021951	CP026259.1	complement(6247155..6272129)	3.1468	1.47053	2.77123	0.0020409	0.0522905	1	protein_coding	K17447//SHC-transforming protein 2;K05060//interleukin 6 signal transducer	AWP16286.1//Class I helical cytokine receptor number 1 [Scophthalmus maximus]
SMAX5B_014590	CP026253.1	17634565..17639176	7.25025	1.47035	2.7709	0.000338612	0.016707	1	protein_coding	K08807//proto-oncogene serine/threonine-protein kinase Pim-3 [EC:2.7.11.1];K04702//proto-oncogene serine/threonine-protein kinase Pim-1 [EC:2.7.11.1]	AWP09950.1//putative serine/threonine-protein kinase pim-2 [Scophthalmus maximus]
SMAX5B_021091	CP026257.1	complement(904254..912410)	23.5941	1.46207	2.75504	4.19775e-05	0.00382956	0.725413	protein_coding	K05139//interleukin 22 receptor alpha 2	XP_035462159.1//interleukin-22 receptor subunit alpha-2 [Scophthalmus maximus]
SMAX5B_017429	CP026260.1	15279317..15282967	12.1234	1.45751	2.74635	0.000683617	0.0258145	1	protein_coding	K04254//retinal G protein coupled receptor	XP_035469764.1//retinal G protein coupled receptor b [Scophthalmus maximus]
SMAX5B_015621	CP026264.1	9866611..9871872	1.13335	1.4544	2.74042	0.0029826	0.0660033	1	protein_coding	K09194//transcription factor Sp4	AWP21755.1//putative transcription factor Sp4 [Scophthalmus maximus]
SMAX5B_011695	CP026243.1	21052770..21054674	3.85743	1.45257	2.73694	0.00353128	0.0720115	1	protein_coding	K17924//sorting nexin-10/11	AWO96727.1//putative sorting nexin-10 [Scophthalmus maximus]
SMAX5B_011007	CP026251.1	complement(6013015..6026421)	22.9542	1.44838	2.72902	1.55775e-06	0.000302017	0.0269195	protein_coding	K21357//serine/threonine-protein kinase ULK1 [EC:2.7.11.1]	XP_035495893.1//serine/threonine-protein kinase ULK1a isoform X1 [Scophthalmus maximus]
SMAX5B_020103	CP026260.1	complement(11840764..11854573)	3.50747	1.44491	2.72246	8.95619e-05	0.00657293	1	protein_coding	K06462//integrin alpha X;K06461//integrin alpha M	AWP17632.1//putative integrin alpha-M-like [Scophthalmus maximus]
SMAX5B_008248	CP026262.1	9390312..9396916	65.994	1.44123	2.71552	7.77583e-07	0.0001712	0.0134374	protein_coding	K00649//glyceronephosphate O-acyltransferase [EC:2.3.1.42]	AWP19898.1//putative dihydroxyacetone phosphate acyltransferase [Scophthalmus maximus]
SMAX5B_008837	CP026255.1	complement(13027456..13039175)	90.8175	1.43564	2.70503	9.18655e-09	4.58974e-06	0.000158753	protein_coding	K10394//kinesin family member 3A;K06505//CD74 antigen	AWP12145.1//putative osmotic avoidance abnormal protein 3-like [Scophthalmus maximus]
SMAX5B_010001	CP026252.1	14967122..14976036	2.03943	1.4296	2.69373	0.00261515	0.0610986	1	protein_coding	K11661//helicase SRCAP [EC:3.6.4.-];K00901//diacylglycerol kinase (ATP) [EC:2.7.1.107];K23757	AWP08581.1//Hypothetical protein SMAX5B_010001 [Scophthalmus maximus]
SMAX5B_015998	CP026261.1	complement(19846812..19851502)	3.1563	1.422	2.67956	0.00917828	0.129734	1	protein_coding	K04638//intraflagellar transport protein 57	XP_035471773.1//intraflagellar transport protein 57 homolog isoform X1 [Scophthalmus maximus]
SMAX5B_014317	CP026248.1	complement(14807378..14817213)	19.332	1.41333	2.66352	4.76457e-06	0.000719672	0.0823366	protein_coding	K08531//nuclear receptor subfamily 1 group D member 2;K03728//nuclear receptor subfamily 1 group D member 1	XP_035487716.1//nuclear receptor subfamily 1 group D member 2-like [Scophthalmus maximus]
SMAX5B_001910	CP026250.1	19136338..19141885	47.1055	1.40806	2.65381	1.60454e-07	4.43467e-05	0.00277281	protein_coding	K00252//glutaryl-CoA dehydrogenase [EC:1.3.8.6]	XP_035492122.1//glutaryl-CoA dehydrogenase a [Scophthalmus maximus]
SMAX5B_002614	CP026253.1	6241486..6342826	33.3092	1.40367	2.64574	1.18683e-08	5.02495e-06	0.000205096	protein_coding	K06254//agrin	XP_035500409.1//agrin [Scophthalmus maximus]
SMAX5B_009907	CP026252.1	complement(12877818..12881051)	14.5373	1.3931	2.62642	0.00311032	0.0675408	1	protein_coding	K01366//cathepsin H [EC:3.4.22.16]	AWP08472.1//putative pro-cathepsin H [Scophthalmus maximus]
SMAX5B_006347	CP026261.1	complement(6690630..6712417)	11.9276	1.39191	2.62426	3.9912e-05	0.003677	0.689719	protein_coding	K11976//E3 ubiquitin-protein ligase RNF216 [EC:2.3.2.31]	XP_023251611.1//E3 ubiquitin-protein ligase RNF216 [Seriola lalandi dorsalis]
SMAX5B_008496	CP026257.1	15729374..15736245	76.6384	1.3852	2.61208	0.000121529	0.00835111	1	protein_coding	K11251//histone H2A	XP_035462456.1//core histone macro-H2A.2 isoform X1 [Scophthalmus maximus]
SMAX5B_014739	CP026253.1	complement(21306703..21321263)	3.22889	1.38245	2.60711	7.06433e-05	0.00565243	1	protein_coding	K18024//tyrosine-protein phosphatase non-receptor type 12/18/22 [EC:3.1.3.48]	AWP10160.1//putative tyrosine-protein phosphatase non-receptor type 22 [Scophthalmus maximus]
SMAX5B_019946	CP026245.1	4630329..4645753	322.071	1.38181	2.60596	0.000170207	0.0106811	1	protein_coding	K08268//hypoxia-inducible factor 1 alpha	XP_035479602.1//hypoxia inducible factor 1 subunit alpha, like isoform X2 [Scophthalmus maximus]
SMAX5B_004921	CP026250.1	complement(23262597..23270869)	4.47979	1.37867	2.60029	0.00226136	0.0559525	1	protein_coding	K10327//ankyrin repeat and SOCS box protein 5	XP_035492955.1//ankyrin repeat and SOCS box protein 5-like [Scophthalmus maximus]
SMAX5B_021658	CP026256.1	1094623..1114888	8.13175	1.37558	2.59472	9.85519e-06	0.00120423	0.170307	protein_coding	K06464//integrin beta 2	AWP12662.1//putative integrin beta-2, partial [Scophthalmus maximus]
SMAX5B_019021	CP026255.1	complement(5523585..5528070)	8.62468	1.3738	2.59152	0.00285888	0.063809	1	protein_coding	K00121//S-(hydroxymethyl)glutathione dehydrogenase / alcohol dehydrogenase [EC:1.1.1.284 1.1.1.1]	XP_035505469.1//alcohol dehydrogenase class-3-like isoform X2 [Scophthalmus maximus]
SMAX5B_018268	CP026256.1	14593308..14596707	2.35485	1.37362	2.5912	0.00736739	0.113931	1	protein_coding	K05476//tumor necrosis factor ligand superfamily member 13B	XP_035460400.1//tumor necrosis factor ligand superfamily member 13B isoform X1 [Scophthalmus maximus]
SMAX5B_020735	CP026261.1	13497764..13509990	1.60218	1.37297	2.59002	0.00153391	0.0442788	1	protein_coding	K20653//GEM interacting protein	AWP19075.1//putative GEM-interacting protein [Scophthalmus maximus]
SMAX5B_015625	CP026264.1	1655289..1660328	7.45702	1.37291	2.58992	0.000843681	0.0298622	1	protein_coding	K06751//MHC class I antigen	AWP21234.1//putative major histocompatibility complex class I-related protein-like [Scophthalmus maximus]
SMAX5B_005782	CP026249.1	9671087..9676339	70.4757	1.37221	2.58867	8.40924e-06	0.00113788	0.14532	protein_coding	K01915//glutamine synthetase [EC:6.3.1.2]	AWP04044.1//Glutamine synthetase isoform 2, partial [Scophthalmus maximus]
SMAX5B_004078	CP026246.1	12274655..12279244	8.56449	1.37082	2.58617	0.00521159	0.0932487	1	protein_coding	K08399//leucine-rich repeat-containing G protein-coupled receptor 6;K23533//leucine-rich repeat and immunoglobulin-like domain-containing nogo receptor-interacting protein;K13023//carboxypeptidase N regulatory subunit;K16340//PH domain and leucine-rich repeat-containing protein phosphatase [EC:3.1.3.16];K12357//sialidase-2/3/4 [EC:3.2.1.18]	AWP00132.1//putative X-ray radiation resistance-associated protein 1 [Scophthalmus maximus]
SMAX5B_010597	CP026244.1	complement(19935868..19940303)	8.32307	1.36153	2.56958	3.62586e-05	0.00345667	0.626585	protein_coding	K06106//cortactin	AWO98172.1//putative src substrate protein p85-like isoform 2 [Scophthalmus maximus]
SMAX5B_015964	CP026259.1	19945632..19977590	4.97917	1.35694	2.56142	0.000247106	0.0136592	1	protein_coding	K19674//WD repeat-containing protein 35;K19467//matrilin-3	AWP16954.1//putative WD repeat-containing protein 35 [Scophthalmus maximus]
SMAX5B_009056	CP026259.1	5050845..5053308	10.3672	1.35636	2.56039	0.00227444	0.0559565	1	protein_coding	K04402//growth arrest and DNA-damage-inducible protein	XP_035466655.1//growth arrest and DNA damage-inducible protein GADD45 beta-like [Scophthalmus maximus]
SMAX5B_010445	CP026251.1	complement(19007517..19011733)	3.93819	1.3536	2.55549	0.00181569	0.0490794	1	protein_coding	K15889//prenylcysteine alpha-carboxyl methylesterase [EC:3.1.1.-]	XP_035496787.1//probable isoprenylcysteine alpha-carbonyl methylesterase ICMEL1 [Scophthalmus maximus]
SMAX5B_018556	CP026256.1	complement(4745143..4765343)	5.55343	1.35082	2.55057	0.00518525	0.0931623	1	protein_coding	K15731//carboxy-terminal domain RNA polymerase II polypeptide A small phosphatase [EC:3.1.3.16]	AWP12794.1//Carboxy-terminal domain RNA polymerase II polypeptide A small phosphatase 1 [Scophthalmus maximus]
SMAX5B_019041	CP026255.1	complement(17353421..17358625)	252.374	1.34644	2.54283	0.000197834	0.0115148	1	protein_coding	K18645//eukaryotic translation initiation factor 4E binding protein 3	XP_035505856.1//eukaryotic translation initiation factor 4E-binding protein 3-like [Scophthalmus maximus]
SMAX5B_016547	CP026251.1	14767057..14777562	6.39272	1.34422	2.53893	0.00162251	0.0455504	1	protein_coding	K11536//pyrimidine nucleoside transport protein	XP_034451458.1//solute carrier family 28 member 3-like [Hippoglossus hippoglossus]
SMAX5B_006628	CP026261.1	7107285..7114535	2.19758	1.34186	2.53478	0.0088111	0.126471	1	protein_coding	K04738//cytokine receptor common subunit beta	AWP18642.1//putative interleukin-4 receptor subunit alpha [Scophthalmus maximus]
SMAX5B_020870	CP026261.1	complement(9413059..9417039)	586.953	1.33797	2.52795	0.000202023	0.0116118	1	protein_coding	K14443//protein Tob/BTG	AWP18791.1//Transducer of ERBB2 1b [Scophthalmus maximus]
SMAX5B_005155	CP026248.1	9307961..9328807	2.45498	1.33175	2.51709	0.00206729	0.0527584	1	protein_coding	K05750//NCK-associated protein 1	XP_018534477.1//nck-associated protein 1-like [Lates calcarifer]
SMAX5B_013472	CP026245.1	complement(13208834..13210979)	7.0488	1.33123	2.51618	0.00822805	0.121457	1	protein_coding	K15142//mediator of RNA polymerase II transcription subunit 29	XP_035479449.1//mediator of RNA polymerase II transcription subunit 29 [Scophthalmus maximus]
SMAX5B_000003	CP026262.1	complement(17283285..17285069)	89.0329	1.3299	2.51385	2.01446e-06	0.000363443	0.034812	protein_coding	K07612//gap junction alpha-3 protein	XP_035472898.1//gap junction Cx32.2 protein-like [Scophthalmus maximus]
SMAX5B_000349	CP026259.1	12144144..12145597	86.9559	1.32626	2.50752	0.000930721	0.0319843	1	protein_coding	K07232//glutathione-specific gamma-glutamylcyclotransferase [EC:4.3.2.7]	XP_035465859.1//glutathione-specific gamma-glutamylcyclotransferase 1-like [Scophthalmus maximus]
SMAX5B_013154	CP026247.1	21361891..21373489	118.019	1.32332	2.50242	1.39852e-05	0.00162203	0.241678	protein_coding	K19871//sal-like protein	XP_035484408.1//sal-like protein 1a isoform X1 [Scophthalmus maximus]
SMAX5B_010293	CP026251.1	complement(19159536..19167053)	13.981	1.31925	2.49536	0.00151072	0.0440995	1	protein_coding	K00509//prostaglandin-endoperoxide synthase 1 [EC:1.14.99.1]	XP_019954609.1//prostaglandin G/H synthase 1-like [Paralichthys olivaceus]
SMAX5B_013383	CP026245.1	complement(14211504..14226789)	18.9386	1.3152	2.48837	0.000650829	0.0250126	1	protein_coding	K09115//MAX-binding protein	AWO99058.1//putative max-binding protein MNT [Scophthalmus maximus]
SMAX5B_020500	CP026254.1	complement(3611446..3633351)	3.86587	1.31502	2.48807	0.00643361	0.104332	1	protein_coding	K16743//abnormal spindle-like microcephaly-associated protein	AWP10566.1//putative abnormal spindle-like microcephaly-associated protein [Scophthalmus maximus]
SMAX5B_000311	CP026259.1	10591553..10596552	11.842	1.30522	2.47121	7.71616e-05	0.00591389	1	protein_coding	K11165//dehydrogenase/reductase SDR family member 7 [EC:1.1.-.-]	AWP16501.1//putative dehydrogenase/reductase SDR family member 7 [Scophthalmus maximus]
SMAX5B_000460	CP026259.1	12756964..12759704	195.431	1.30427	2.46959	2.32459e-06	0.000397321	0.0401712	protein_coding	NA	XP_035529962.1//GTP cyclohydrolase 1 feedback regulatory protein [Morone saxatilis]
SMAX5B_016576	CP026251.1	complement(12818988..12822870)	4.14456	1.30128	2.46447	0.00267735	0.0615667	1	protein_coding	K03648//uracil-DNA glycosylase [EC:3.2.2.27]	XP_035494966.1//uracil DNA glycosylase a isoform X1 [Scophthalmus maximus]
SMAX5B_008737	CP026261.1	complement(15453605..15465664)	1.78147	1.2979	2.45871	0.00682663	0.108408	1	protein_coding	K04512//dishevelled associated activator of morphogenesis;K05740//diaphanous 1;K05741//diaphanous 2	XP_035472115.1//formin-like protein 1 [Scophthalmus maximus]
SMAX5B_008974	CP026259.1	complement(4667119..4672302)	12.999	1.29749	2.45801	0.00356309	0.0725463	1	protein_coding	K10571//de-etiolated-1;K14636//MFS transporter, DHA1 family, solute carrier family 18 (vesicular acetylcholine transporter), member 3;K08155//MFS transporter, DHA1 family, solute carrier family 18 (vesicular amine transporter), member 1/2	AWP16183.1//putative MFS-type transporter SLC18B1 [Scophthalmus maximus]
SMAX5B_010865	CP026251.1	10224630..10229396	10.4937	1.29402	2.45211	4.21576e-05	0.00382956	0.728525	protein_coding	K15180//negative elongation factor B;K20910//thioredoxin-interacting protein	XP_035494798.1//arrestin domain-containing protein 3 [Scophthalmus maximus]
SMAX5B_009419	CP026255.1	10444938..10449341	14.6204	1.28919	2.4439	0.000720633	0.0268224	1	protein_coding	K22154//dapper	AWP11996.1//Dapper domain containing protein [Scophthalmus maximus]
SMAX5B_016004	CP026261.1	complement(19538434..19565318)	4.21945	1.28668	2.43967	0.00126918	0.0396314	1	protein_coding	K18441//cytohesin	AWP19442.1//putative cytohesin-2-like [Scophthalmus maximus]
SMAX5B_001378	CP026261.1	complement(1253699..1265228)	6.06796	1.28173	2.4313	0.0012831	0.0399688	1	protein_coding	K23040//methyltransferase-like protein 22 [EC:2.1.1.-]	AWP18305.1//putative methyltransferase-like protein 22 isoform 4 [Scophthalmus maximus]
SMAX5B_009236	CP026254.1	complement(447848..453416)	1.80627	1.28065	2.42949	0.00784815	0.118959	1	protein_coding	K14217//interferon-induced protein with tetratricopeptide repeats 1	AWP10440.1//Interferon-inducible protein 56 [Scophthalmus maximus]
SMAX5B_003260	CP026253.1	complement(9279353..9284715)	9.2174	1.27845	2.42579	0.000891554	0.030966	1	protein_coding	K05399//lipopolysaccharide-binding protein	XP_035500179.1//lipopolysaccharide-binding protein [Scophthalmus maximus]
SMAX5B_019234	CP026255.1	complement(16141434..16153663)	22.3556	1.2728	2.4163	0.00211115	0.0536671	1	protein_coding	K16502//cadherin-related family member 2	AWP12329.1//putative cadherin-related family member 2 [Scophthalmus maximus]
SMAX5B_013515	CP026246.1	17533425..17537937	6.71345	1.26728	2.40707	0.00419167	0.0812683	1	protein_coding	K12006//tripartite motif-containing protein 16	XP_035481373.1//finTRIM family, member 83 isoform X2 [Scophthalmus maximus]
SMAX5B_010492	CP026251.1	complement(17371333..17380027)	2.13801	1.26627	2.4054	0.00816585	0.121133	1	protein_coding	K01307//gamma-glutamyl hydrolase [EC:3.4.19.9];K10524//nicotinamide/nicotinate riboside kinase [EC:2.7.1.22 2.7.1.173]	XP_035495548.1//gamma-glutamyl hydrolase [Scophthalmus maximus]
SMAX5B_016657	CP026243.1	complement(4486395..4500089)	8.97646	1.2662	2.40526	0.00110154	0.0356081	1	protein_coding	K05871//focal adhesion kinase 2 [EC:2.7.10.2]	AWO95711.1//putative protein-tyrosine kinase 2-beta-like [Scophthalmus maximus]
SMAX5B_014320	CP026248.1	complement(18354312..18362061)	5.51001	1.26579	2.40459	0.000792932	0.0285336	1	protein_coding	K23573//dentin sialophosphoprotein	AWP03214.1//putative zinc finger matrin-type protein 1-like [Scophthalmus maximus]
SMAX5B_010593	CP026244.1	complement(20536098..20556233)	8.69835	1.26493	2.40316	0.00176002	0.0482137	1	protein_coding	K06828//midkine;K16642//pleiotrophin	AWO98193.1//Pleiotrophin [Scophthalmus maximus]
SMAX5B_003914	CP026243.1	complement(1147644..1154899)	2.34435	1.25231	2.38222	0.00590214	0.0996993	1	protein_coding	K01278//dipeptidyl-peptidase 4 [EC:3.4.14.5]	XP_035485544.1//dipeptidyl peptidase 4-like isoform X1 [Scophthalmus maximus]
SMAX5B_001385	CP026261.1	complement(1216033..1247006)	145.397	1.2503	2.3789	0.00183964	0.0491325	1	protein_coding	K13524//4-aminobutyrate aminotransferase / (S)-3-amino-2-methylpropionate transaminase [EC:2.6.1.19 2.6.1.22]	XP_035470241.1//4-aminobutyrate aminotransferase, mitochondrial [Scophthalmus maximus]
SMAX5B_005299	CP026258.1	20612298..20616037	80.429	1.24954	2.37765	0.000374534	0.0178212	1	protein_coding	K23168//protein MPAN	AWP15818.1//Hypothetical protein SMAX5B_005299 [Scophthalmus maximus]
SMAX5B_011243	CP026248.1	24552212..24554526	7.79284	1.24467	2.36964	0.00715167	0.111868	1	protein_coding	NA	AWP03466.1//FAM217 domain containing protein [Scophthalmus maximus]
SMAX5B_005747	CP026261.1	6356278..6366801	35.2565	1.24209	2.36541	0.000179366	0.0109806	1	protein_coding	K17497//phosphomannomutase [EC:5.4.2.8]	XP_035470834.1//phosphomannomutase 1 [Scophthalmus maximus]
SMAX5B_005825	CP026249.1	complement(4063872..4092694)	13.2308	1.24182	2.36497	1.05174e-05	0.00126501	0.181751	protein_coding	K06107//erythrocyte membrane protein band 4.1	AWP03747.1//putative band 4.1-like protein 3 [Scophthalmus maximus]
SMAX5B_011772	CP026243.1	17710625..17715545	28.5348	1.23589	2.35527	6.52372e-06	0.000911216	0.112736	protein_coding	K01330//complement component 1, r subcomponent [EC:3.4.21.41]	XP_035497447.1//complement C1s subcomponent-like [Scophthalmus maximus]
SMAX5B_021431	CP026244.1	9113894..9119103	758.046	1.23415	2.35243	6.34256e-05	0.00521455	1	protein_coding	K00477//phytanoyl-CoA hydroxylase [EC:1.14.11.18]	XP_035466499.1//phytanoyl-CoA dioxygenase, peroxisomal [Scophthalmus maximus]
SMAX5B_014802	CP026253.1	complement(12063329..12071673)	18.3911	1.23174	2.3485	0.000531623	0.0223134	1	protein_coding	K20072//switch-associated protein 70	XP_035499697.1//differentially expressed in FDCP 6 homolog isoform X2 [Scophthalmus maximus]
SMAX5B_000773	CP026251.1	22130749..22137868	489.759	1.22899	2.34403	6.87198e-05	0.00557919	1	protein_coding	K16500//protocadherin-15;K23757	AWP07606.1//putative GRAM domain-containing protein 3 [Scophthalmus maximus]
SMAX5B_018308	CP026256.1	7793726..7795810	4.55999	1.22884	2.34379	0.00186876	0.0496426	1	protein_coding	K04189//C-X-C chemokine receptor type 4	XP_019945158.1//C-X-C chemokine receptor type 4 [Paralichthys olivaceus]
SMAX5B_021739	CP026249.1	complement(17515715..17528615)	2.08227	1.22881	2.34373	0.00590065	0.0996993	1	protein_coding	K05854//tyrosine-protein kinase Lyn [EC:2.7.10.2]	XP_018533089.1//tyrosine-protein kinase Lyn-like [Lates calcarifer]
SMAX5B_016191	CP026249.1	complement(25601914..25607176)	1.9753	1.22802	2.34245	0.00900357	0.128524	1	protein_coding	K09110//L-myc proto-oncogene protein	AWP04912.1//putative protein L-Myc-1b-like [Scophthalmus maximus]
SMAX5B_011635	CP026253.1	complement(1958287..1983483)	36.1633	1.21926	2.32828	0.000603171	0.0238878	1	protein_coding	K04570//Bcl-2-like 1 (apoptosis regulator Bcl-X)	XP_035499932.1//bcl-2-like protein 1 [Scophthalmus maximus]
SMAX5B_016578	CP026251.1	12615761..12623312	4.20017	1.2187	2.32737	0.00196125	0.0511343	1	protein_coding	K00869//mevalonate kinase [EC:2.7.1.36]	XP_035495059.1//mevalonate kinase [Scophthalmus maximus]
SMAX5B_013717	CP026243.1	30281661..30290277	373.78	1.2171	2.32479	0.00111024	0.0356981	1	protein_coding	K00128//aldehyde dehydrogenase (NAD+) [EC:1.2.1.3]	AWO97136.1//Aldehyde dehydrogenase mitochondrial isoform 3 [Scophthalmus maximus]
SMAX5B_014414	CP026257.1	complement(534343..595711)	11.9424	1.21696	2.32456	0.00415292	0.0807582	1	protein_coding	K10380//ankyrin	XP_035461269.1//ankyrin-3 isoform X30 [Scophthalmus maximus]
SMAX5B_015803	CP026264.1	10121729..10125834	5.13475	1.21111	2.31516	0.00645459	0.104332	1	protein_coding	K23698	AWP21778.1//putative src-like-adapter [Scophthalmus maximus]
SMAX5B_019882	CP026245.1	complement(4646997..4651754)	46.2333	1.20911	2.31195	0.000262345	0.0140821	1	protein_coding	K23824	XP_035479614.1//sushi domain-containing protein 6 isoform X3 [Scophthalmus maximus]
SMAX5B_019634	CP026262.1	complement(11466566..11480243)	27.3591	1.20767	2.30964	1.69208e-07	4.57919e-05	0.00292408	protein_coding	K14589//cap1 methyltransferase [EC:2.1.1.57]	XP_034999771.1//cap-specific mRNA (nucleoside-2'-O-)-methyltransferase 1 isoform X1 [Hippoglossus stenolepis]
SMAX5B_004402	CP026246.1	complement(30206322..30209598)	93.6078	1.20606	2.30707	9.55984e-07	0.000203578	0.0165204	protein_coding	K00799//glutathione S-transferase [EC:2.5.1.18]	XP_035482555.1//microsomal glutathione S-transferase 1-like [Scophthalmus maximus]
SMAX5B_017645	CP026254.1	complement(17939644..17941619)	19.8911	1.20322	2.30253	0.000316658	0.0158818	1	protein_coding	K09871//aquaporin-12	XP_035503730.1//aquaporin 12 [Scophthalmus maximus]
SMAX5B_002004	CP026263.1	8086610..8092154	2.25794	1.19606	2.29113	0.00702838	0.110531	1	protein_coding	K08010//neutrophil cytosolic factor 2	AWP20894.1//putative neutrophil cytosol factor 2 [Scophthalmus maximus]
SMAX5B_012373	CP026246.1	5198342..5205625	28.389	1.19589	2.29086	8.31125e-05	0.00624064	1	protein_coding	K01755//argininosuccinate lyase [EC:4.3.2.1]	AWO99794.1//putative argininosuccinate lyase isoform 2 [Scophthalmus maximus]
SMAX5B_005483	CP026244.1	12566256..12571736	4.19893	1.18567	2.27469	0.00377398	0.0760062	1	protein_coding	K14388//solute carrier family 5 (sodium-coupled monocarboxylate transporter), member 8/12	XP_035505391.1//sodium-coupled monocarboxylate transporter 1 [Scophthalmus maximus]
SMAX5B_005272	CP026258.1	19709706..19711999	13.8248	1.17929	2.26465	0.00335916	0.0704428	1	protein_coding	NA	AWP15752.1//putative lecithin retinol acyltransferase-like [Scophthalmus maximus]
SMAX5B_009981	CP026252.1	complement(12046472..12060405)	40.9672	1.17801	2.26264	3.28938e-05	0.00323705	0.568438	protein_coding	K08803//death-associated protein kinase [EC:2.7.11.1]	XP_023278353.1//death-associated protein kinase 2 isoform X2 [Seriola lalandi dorsalis]
SMAX5B_022508	CP026254.1	12985536..12991854	3.36452	1.17495	2.25786	0.00679475	0.108166	1	protein_coding	K00637//sterol O-acyltransferase [EC:2.3.1.26]	XP_035503020.1//sterol O-acyltransferase 1 [Scophthalmus maximus]
SMAX5B_009300	CP026255.1	10192644..10290243	16.9327	1.17033	2.25063	0.000446276	0.0201289	1	protein_coding	K23518//O-acetyl-ADP-ribose deacetylase [EC:3.1.1.106]	XP_035506316.1//ADP-ribose glycohydrolase MACROD1 isoform X1 [Scophthalmus maximus]
SMAX5B_019584	CP026262.1	14008476..14016230	20.1808	1.16983	2.24984	0.000198215	0.0115148	1	protein_coding	K06580//ammonium transporter Rh	XP_035473880.1//ammonium transporter Rh type A [Scophthalmus maximus]
SMAX5B_011508	CP026250.1	7985937..7992031	264.338	1.16701	2.24545	0.000145513	0.00945106	1	protein_coding	K15103//solute carrier family 25 (mitochondrial uncoupling protein), member 8/9	XP_035491884.1//mitochondrial brown fat uncoupling protein 1 isoform X1 [Scophthalmus maximus]
SMAX5B_013347	CP026245.1	complement(11778150..11780597)	23.0109	1.16534	2.24287	2.02436e-05	0.00217326	0.34983	protein_coding	K06498//high affinity immunoglobulin gamma Fc receptor I	AWO98923.1//putative high affinity immunoglobulin epsilon receptor subunit alpha [Scophthalmus maximus]
SMAX5B_009409	CP026255.1	9949198..9957088	13.1054	1.15997	2.23452	0.000177315	0.0109682	1	protein_coding	K12358//forkhead box protein O4	AWP11937.1//putative forkhead box protein O4 [Scophthalmus maximus]
SMAX5B_018853	CP026252.1	complement(682323..688104)	28.2371	1.15509	2.22698	0.00310462	0.0675408	1	protein_coding	K16816//patatin-like phospholipase domain-containing protein 2 [EC:3.1.1.3]	AWP07816.1//putative patatin-like phospholipase domain-containing protein 2 [Scophthalmus maximus]
SMAX5B_004967	CP026250.1	23668591..23674537	3.56401	1.1536	2.22468	0.00535426	0.0947319	1	protein_coding	K10060//C-type lectin domain family 4 member F	XP_035492935.1//CD209 antigen-like [Scophthalmus maximus]
SMAX5B_010587	CP026244.1	3139839..3150709	3.03043	1.15248	2.22295	0.00265156	0.0615667	1	protein_coding	K06070//protein kinase D [EC:2.7.11.13]	AWO97431.1//putative serine/threonine-protein kinase D3-like [Scophthalmus maximus]
SMAX5B_018295	CP026256.1	15458665..15474766	2.79207	1.15061	2.22008	0.000514992	0.0218619	1	protein_coding	K01109//inositol polyphosphate-4-phosphatase [EC:3.1.3.66]	AWP13331.1//putative type I inositol 3-4-bisphosphate 4-phosphatase-like [Scophthalmus maximus]
SMAX5B_007169	CP026249.1	1794645..1805329	17.1042	1.14934	2.21812	0.000339543	0.016707	1	protein_coding	K06724//neuropilin 1	AWP03624.1//putative neuropilin-1a-like, partial [Scophthalmus maximus]
SMAX5B_019521	CP026253.1	complement(232497..242536)	4.76293	1.14809	2.21621	5.20374e-05	0.00447147	0.899259	protein_coding	K08893//hemopoietic cell kinase [EC:2.7.10.2]	XP_031589749.1//tyrosine-protein kinase HCK-like [Oreochromis aureus]
SMAX5B_016454	CP026251.1	13545848..13550158	30.0029	1.1441	2.21008	0.000186788	0.0111302	1	protein_coding	K13403//methylenetetrahydrofolate dehydrogenase(NAD+) / 5,10-methenyltetrahydrofolate cyclohydrolase [EC:1.5.1.15 3.5.4.9]	AWP07139.1//putative bifunctional methylenetetrahydrofolate dehydrogenase/cyclohydrolase mitochondrial-like isoform 2 [Scophthalmus maximus]
SMAX5B_012990	CP026250.1	complement(2606290..2619217)	2.53412	1.13641	2.19833	0.00757582	0.116049	1	protein_coding	K18441//cytohesin	XP_018540849.1//ytohesin-4-like isoform X1 [Lates calcarifer]
SMAX5B_015577	CP026264.1	complement(1688522..1691910)	13.6332	1.13529	2.19663	0.00243633	0.058716	1	protein_coding	K02739//20S proteasome subunit beta 2 [EC:3.4.25.1];K02738//20S proteasome subunit beta 1 [EC:3.4.25.1]	XP_035477150.1//proteasome 20S subunit beta 12 isoform X1 [Scophthalmus maximus]
SMAX5B_006084	CP026249.1	7931599..7932981	251.609	1.13397	2.19461	0.000348836	0.0169715	1	protein_coding	K10050//CCAAT/enhancer binding protein (C/EBP), delta	XP_035490006.1//CCAAT/enhancer-binding protein delta [Scophthalmus maximus]
SMAX5B_013038	CP026248.1	complement(4235315..4238088)	26.1981	1.13367	2.19416	0.00129537	0.0399688	1	protein_coding	K22077//ganglioside-induced differentiation-associated protein 1;K13172//serine/arginine repetitive matrix protein 2	AWP02357.1//putative oxidative stress-responsive serine-rich protein 1 [Scophthalmus maximus]
SMAX5B_013906	CP026258.1	complement(16338735..16342487)	2.8942	1.12539	2.1816	0.00428812	0.0826449	1	protein_coding	K15839//G-protein signaling modulator 1;K15837//G-protein signaling modulator 2	AWP15635.1//putative G-protein-signaling modulator 1-like [Scophthalmus maximus]
SMAX5B_012203	CP026243.1	19550695..19572352	8.6143	1.12513	2.18121	0.00152477	0.0442788	1	protein_coding	K20733//mesothelin;K05055//interleukin 6 receptor	XP_035485824.1//otoancorin [Scophthalmus maximus]
SMAX5B_002140	CP026243.1	complement(126832..165288)	94.5195	1.11994	2.17338	0.000330862	0.016467	1	protein_coding	K13990//glutamate formiminotransferase / formiminotetrahydrofolate cyclodeaminase [EC:2.1.2.5 4.3.1.4];K08596//sentrin-specific protease 7 [EC:3.4.22.68];K23215//bcl-6 corepressor;K05748//WAS protein family, member 2	AWO95488.1//putative BCL-6 corepressor-like [Scophthalmus maximus]
SMAX5B_007339	CP026250.1	11647220..11650258	461.487	1.11771	2.17002	0.000124826	0.00848947	1	protein_coding	K00049//glyoxylate/hydroxypyruvate reductase [EC:1.1.1.79 1.1.1.81]	AWP05668.1//putative glyoxylate reductase/hydroxypyruvate reductase [Scophthalmus maximus]
SMAX5B_011158	CP026261.1	16202882..16208709	14.5739	1.11528	2.16637	0.000260445	0.0140821	1	protein_coding	K13171//serine/arginine repetitive matrix protein 1	AWP19249.1//putative interferon-induced 35 kDa protein [Scophthalmus maximus]
SMAX5B_002445	CP026255.1	complement(11605589..11687825)	1.83646	1.1152	2.16625	0.00546144	0.0954834	1	protein_coding	K12367//dedicator of cytokinesis protein 2	AWP12026.1//putative dedicator of cytokinesis protein 2 [Scophthalmus maximus]
SMAX5B_022448	CP026254.1	complement(5071803..5079495)	6.03648	1.11379	2.16414	0.00176301	0.0482137	1	protein_coding	K04994//mucolipin 3	AWP10638.1//putative mucolipin-3-like isoform 4 [Scophthalmus maximus]
SMAX5B_012682	CP026247.1	16152986..16163398	53.4804	1.09885	2.14184	0.00193698	0.050891	1	protein_coding	K00844//hexokinase [EC:2.7.1.1]	AWP01716.1//putative hexokinase HKDC1 [Scophthalmus maximus]
SMAX5B_002001	CP026250.1	complement(20861525..20878326)	4.92966	1.09738	2.13966	0.000707325	0.0264027	1	protein_coding	K05718//integrin alpha L	AWP06281.1//putative integrin alpha-L-like [Scophthalmus maximus]
SMAX5B_010350	CP026251.1	16648314..16649228	52.8201	1.09162	2.13113	0.00311088	0.0675408	1	protein_coding	K22017//mucin-4	XP_027725048.1//growth arrest and DNA damage-inducible protein GADD45 gamma [Vombatus ursinus]
SMAX5B_008679	CP026257.1	complement(12665246..12671371)	2.17225	1.08612	2.12302	0.00836709	0.122812	1	protein_coding	K12230//phosphoinositide 3-kinase adapter protein 1	AWP14337.1//putative phosphoinositide 3-kinase adapter protein 1 [Scophthalmus maximus]
SMAX5B_011010	CP026251.1	8779713..8782962	64.9621	1.08529	2.12181	0.000104247	0.00739981	1	protein_coding	K00463//indoleamine 2,3-dioxygenase [EC:1.13.11.52]	XP_035497015.1//indoleamine 2,3-dioxygenase 1 [Scophthalmus maximus]
SMAX5B_012974	CP026250.1	1996526..2015025	5.45749	1.08019	2.11432	0.00161372	0.0455504	1	protein_coding	K05948//fringe [EC:2.4.1.222]	AWP05175.1//putative beta-1-3-N-acetylglucosaminyltransferase manic fringe-like [Scophthalmus maximus]
SMAX5B_022696	CP026243.1	complement(8315259..8326279)	4.39023	1.08005	2.11412	0.0056047	0.0965585	1	protein_coding	K10955//mucin-2	AWO95919.1//putative thioredoxin domain-containing protein 16 [Scophthalmus maximus]
SMAX5B_015052	CP026248.1	27356612..27367076	18.2983	1.07973	2.11364	0.000777764	0.0283002	1	protein_coding	K09228//KRAB domain-containing zinc finger protein;K09210//krueppel-like factor 15	AWP03539.1//putative Krueppel-like factor 15 [Scophthalmus maximus]
SMAX5B_014122	CP026248.1	16085597..16097496	39.4639	1.07218	2.1026	3.4886e-05	0.00338186	0.602865	protein_coding	K21945//period circadian protein 3	AWP03088.1//Period 3 circadian protein [Scophthalmus maximus]
SMAX5B_015619	CP026264.1	complement(1686526..1688379)	9.84503	1.07162	2.10179	0.00116735	0.0372262	1	protein_coding	K02741//20S proteasome subunit beta 9 [EC:3.4.25.1]	XP_035477152.1//proteasome subunit beta type-9 [Scophthalmus maximus]
SMAX5B_009391	CP026255.1	complement(10179143..10190722)	3.96285	1.06699	2.09505	0.00663324	0.106378	1	protein_coding	K17084//kindlin 3	AWP11970.1//putative fermitin family -like 3 [Scophthalmus maximus]
SMAX5B_017432	CP026260.1	17922310..17924672	687.464	1.06533	2.09265	7.73951e-05	0.00591389	1	protein_coding	K01084//glucose-6-phosphatase [EC:3.1.3.9]	AWP18008.1//Glucose-6-phosphatase 2 [Scophthalmus maximus]
SMAX5B_011559	CP026250.1	8011575..8081565	5.96071	1.06447	2.09141	0.00013023	0.00863103	1	protein_coding	K10352//myosin heavy chain;K23114//protein-glutamate O-methyltransferase [EC:2.1.1.-];K13172//serine/arginine repetitive matrix protein 2;K23573//dentin sialophosphoprotein;K01362//ovochymase [EC:3.4.21.-]	AWP05463.1//putative ovochymase-2-like [Scophthalmus maximus]
SMAX5B_009435	CP026255.1	8726290..8739230	10.8683	1.05956	2.0843	0.000876714	0.0305322	1	protein_coding	K17598//synaptotagmin-like protein	AWP11867.1//putative synaptotagmin-like protein 4 [Scophthalmus maximus]
SMAX5B_002383	CP026248.1	complement(13471944..13531240)	18.1402	1.05748	2.08129	0.000181779	0.0109806	1	protein_coding	K23573//dentin sialophosphoprotein	XP_035488508.1//testis-expressed protein 264 [Scophthalmus maximus]
SMAX5B_001296	CP026262.1	complement(1271195..1281209)	2.36837	1.04468	2.06291	0.0096036	0.133404	1	protein_coding	K18668//ribonuclease ZC3H12 [EC:3.1.-.-]	XP_035473848.1//probable ribonuclease ZC3H12D [Scophthalmus maximus]
SMAX5B_015827	CP026264.1	complement(5751007..5754633)	7.23753	1.04451	2.06266	0.0034864	0.0715455	1	protein_coding	K21599//circadian-associated transcriptional repressor	XP_035476829.1//circadian associated repressor of transcription a [Scophthalmus maximus]
SMAX5B_003587	CP026243.1	15134721..15137747	12.3645	1.04191	2.05896	0.000450947	0.0201993	1	protein_coding	K12799//apoptosis-associated speck-like protein containing a CARD	XP_035494326.1//apoptosis-associated speck-like protein containing a CARD [Scophthalmus maximus]
SMAX5B_002038	CP026263.1	8284414..8290330	6.63392	1.03568	2.05008	0.00405375	0.0794574	1	protein_coding	K16280//E3 ubiquitin-protein ligase RGLG [EC:2.3.2.27];K20493//leucine-rich repeat-containing protein 16	AWP20923.1//putative copine-3-like [Scophthalmus maximus]
SMAX5B_015760	CP026264.1	1691792..1695154	31.0398	1.03445	2.04833	0.00491421	0.0901	1	protein_coding	K02739//20S proteasome subunit beta 2 [EC:3.4.25.1]	AWP21247.1//putative proteasome subunit beta type-7-like [Scophthalmus maximus]
SMAX5B_000282	CP026259.1	complement(8751843..8758478)	105.078	1.03127	2.04382	0.00224565	0.0556698	1	protein_coding	K15109//solute carrier family 25 (mitochondrial carnitine/acylcarnitine transporter), member 20/29	XP_035465734.1//mitochondrial basic amino acids transporter [Scophthalmus maximus]
SMAX5B_005208	CP026248.1	complement(7132957..7140003)	2287.91	1.03108	2.04355	0.00958281	0.133404	1	protein_coding	K07436//vitamin D3 24-hydroxylase [EC:1.14.15.16]	AWP02484.1//cyp24a1l [Scophthalmus maximus]
SMAX5B_006441	CP026249.1	14963416..14967849	161.779	1.02874	2.04024	0.000310184	0.015794	1	protein_coding	K22288//angiopoietin-like 3	XP_035491044.1//angiopoietin-related protein 3-like [Scophthalmus maximus]
SMAX5B_014102	CP026248.1	17437876..17439964	81.0531	1.0266	2.03721	9.69455e-06	0.00120423	0.167531	protein_coding	NA	XP_035486425.1//cytokine-like protein 1 [Scophthalmus maximus]
SMAX5B_012477	CP026247.1	complement(8030208..8048356)	43.481	1.02657	2.03717	0.000112528	0.00785884	1	protein_coding	K07190//phosphorylase kinase alpha/beta subunit	XP_022605178.1//phosphorylase b kinase regulatory subunit alpha, liver isoform isoform X3 [Seriola dumerili]
SMAX5B_008969	CP026259.1	complement(3327875..3331957)	13.5869	1.02399	2.03354	0.000221791	0.0125263	1	protein_coding	K15128//mediator of RNA polymerase II transcription subunit 6	AWP16108.1//Mediator of RNA polymerase II transcription subunit 6 isoform 3 [Scophthalmus maximus]
SMAX5B_003223	CP026247.1	complement(26240902..26244121)	194.461	1.02348	2.03281	0.00155722	0.0446541	1	protein_coding	K21247//tumor protein p53-inducible nuclear protein 2	AWP02039.1//putative tumor protein p53-inducible nuclear protein 2-like [Scophthalmus maximus]
SMAX5B_014872	CP026253.1	16389139..16392962	5.16017	1.02098	2.0293	0.00249659	0.0596861	1	protein_coding	K21916//BTB/POZ domain-containing protein KCTD6	XP_035502289.1//BTB/POZ domain-containing protein KCTD6 isoform X1 [Scophthalmus maximus]
SMAX5B_001868	CP026263.1	9851010..9857051	24.4879	1.01868	2.02606	0.00134282	0.0408651	1	protein_coding	K04415//mitogen-activated protein kinase kinase kinase 8 [EC:2.7.11.25]	XP_035475066.1//mitogen-activated protein kinase kinase kinase 8 [Scophthalmus maximus]
SMAX5B_005112	CP026252.1	5154548..5155719	7.94789	1.01551	2.02161	0.00527963	0.0940161	1	protein_coding	NA	XP_035499244.1//uncharacterized protein C11orf96 homolog [Scophthalmus maximus]
SMAX5B_015674	CP026264.1	1695597..1698419	14.3901	1.00748	2.0104	0.00310498	0.0675408	1	protein_coding	K02740//20S proteasome subunit beta 8 [EC:3.4.25.1]	AWP21248.1//Proteasome subunit beta type [Scophthalmus maximus]
SMAX5B_021584	CP026250.1	complement(793819..795281)	26.7518	1.00158	2.00218	0.00204629	0.0523254	1	protein_coding	K16741//alstrom syndrome protein 1;K22614//NLR family CARD domain-containing protein 3	XP_035493573.1//F-box only protein 48 isoform X1 [Scophthalmus maximus]
SMAX5B_022361	CP026254.1	complement(7947499..7958801)	40.198	1.00069	2.00096	0.000256067	0.0139761	1	protein_coding	K20910//thioredoxin-interacting protein	XP_035503422.1//arrestin domain-containing protein 2 isoform X2 [Scophthalmus maximus]
SMAX5B_012551	CP026247.1	complement(9502705..9529353)	3.81202	-1.00037	-2.00052	0.00847819	0.123487	1	protein_coding	K12380//Ras GTPase-activating protein 3	AWP01418.1//putative ras GTPase-activating protein 3 [Scophthalmus maximus]
SMAX5B_010273	CP026256.1	21395392..21416797	15.9848	-1.00181	-2.00252	0.00045873	0.0202752	1	protein_coding	K00921//1-phosphatidylinositol-3-phosphate 5-kinase [EC:2.7.1.150]	AWP13647.1//putative 1-phosphatidylinositol 3-phosphate 5-kinase [Scophthalmus maximus]
SMAX5B_008417	CP026245.1	complement(1143375..1204050)	19.8132	-1.0025	-2.00347	0.00276125	0.0626309	1	protein_coding	K10176//T-box protein 2	AWO98449.1//putative T-box transcription factor TBX2 [Scophthalmus maximus]
SMAX5B_015178	CP026258.1	6686628..6753240	5.52306	-1.0058	-2.00806	0.00482654	0.0892307	1	protein_coding	K08878//breakpoint cluster region protein [EC:2.7.11.1]	AWP15097.1//putative breakpoint cluster region protein-like [Scophthalmus maximus]
SMAX5B_019404	CP026246.1	complement(7082927..7098659)	21.3698	-1.00582	-2.00808	0.000986086	0.0332708	1	protein_coding	K01869//leucyl-tRNA synthetase [EC:6.1.1.4]	XP_035480989.1//leucine--tRNA ligase, cytoplasmic-like [Scophthalmus maximus]
SMAX5B_002350	CP026248.1	complement(11046120..11051224)	15.8502	-1.00693	-2.00963	0.000168907	0.010651	1	protein_coding	K13706//abhydrolase domain-containing protein 14	AWP02651.1//putative alpha/beta hydrolase domain-containing protein 14B [Scophthalmus maximus]
SMAX5B_015254	CP026251.1	complement(25104742..25127437)	65.7551	-1.0125	-2.01741	0.000175789	0.0109259	1	protein_coding	K06834//disintegrin and metalloproteinase domain-containing protein 9 [EC:3.4.24.-]	AWP07767.1//putative disintegrin and metalloproteinase domain-containing protein 9 [Scophthalmus maximus]
SMAX5B_002976	CP026258.1	1283230..1351676	4.47679	-1.01394	-2.01942	0.00153038	0.0442788	1	protein_coding	K04867//voltage-dependent calcium channel gamma-2;K21125//mucin-5AC;K22016//mucin-3/17	XP_035465118.1//WD repeat-containing protein 7 isoform X2 [Scophthalmus maximus]
SMAX5B_001946	CP026263.1	5192923..5197870	32.1603	-1.01521	-2.0212	0.000305392	0.01568	1	protein_coding	K01830//prostaglandin-H2 D-isomerase [EC:5.3.99.2]	AWP20782.1//Lipocalin isoform 3 [Scophthalmus maximus]
SMAX5B_017812	CP026252.1	20835234..20843121	12.2606	-1.01526	-2.02127	0.0031248	0.0676518	1	protein_coding	K23332//RING finger and SPRY domain-containing protein 1	AWP08857.1//putative RING finger and SPRY domain-containing protein 1-like [Scophthalmus maximus]
SMAX5B_013480	CP026245.1	12693907..12700510	7.13703	-1.01785	-2.02489	0.00761016	0.116438	1	protein_coding	K05616//solute carrier family 1 (neutral amino acid transporter), member 5	XP_035478502.1//neutral amino acid transporter B(0) [Scophthalmus maximus]
SMAX5B_022611	CP026254.1	7150965..7164987	6.576	-1.01962	-2.02738	0.00180707	0.0490794	1	protein_coding	K15013//long-chain-fatty-acid--CoA ligase ACSBG [EC:6.2.1.3]	AWP10703.1//putative long-chain-fatty-acid--CoA ligase ACSBG2-like [Scophthalmus maximus]
SMAX5B_017431	CP026260.1	complement(16688512..16689388)	14.8559	-1.02063	-2.0288	0.000751766	0.0276641	1	protein_coding	K01115//phospholipase D1/2 [EC:3.1.4.4];K06467//CD22 antigen;K04696//suppressor of cytokine signaling 3	XP_035469399.1//suppressor of cytokine signaling 3-like [Scophthalmus maximus]
SMAX5B_015641	CP026264.1	complement(10401948..10413862)	5.95616	-1.02435	-2.03404	0.00775238	0.117981	1	protein_coding	K00710//polypeptide N-acetylgalactosaminyltransferase [EC:2.4.1.41]	AWP21784.1//putative polypeptide N-acetylgalactosaminyltransferase 4-like [Scophthalmus maximus]
SMAX5B_015097	CP026258.1	complement(6348667..6366811)	6.53418	-1.02763	-2.03867	0.00906796	0.128876	1	protein_coding	K16536//protein HOOK3	XP_022624422.1//protein Hook homolog 3 isoform X3 [Seriola dumerili]
SMAX5B_012072	CP026243.1	20149744..20160169	5.2099	-1.03003	-2.04207	0.00268258	0.0615667	1	protein_coding	K01887//arginyl-tRNA synthetase [EC:6.1.1.19];K06236//collagen, type I, alpha;K13171//serine/arginine repetitive matrix protein 1	AWO96648.1//putative transmembrane protein 245 [Scophthalmus maximus]
SMAX5B_001775	CP026263.1	complement(6470650..6504082)	6.96296	-1.03488	-2.04895	0.00893369	0.12777	1	protein_coding	K23794	AWP20816.1//Pleckstrin -likey-like domain family B member 2 [Scophthalmus maximus]
SMAX5B_002205	CP026248.1	11169579..11182504	25.3841	-1.03582	-2.05028	7.50949e-05	0.00581824	1	protein_coding	K07955//ADP-ribosylation factor-like protein 8;K10084//ER degradation enhancer, mannosidase alpha-like 1	AWP02669.1//2-Mannosidase [Scophthalmus maximus]
SMAX5B_021429	CP026244.1	complement(9681045..9691961)	4.5047	-1.03699	-2.05194	0.00923752	0.130147	1	protein_coding	K08790//serine/threonine kinase 38 [EC:2.7.11.1]	AWO97775.1//Serine/threonine-protein kinase 38-like [Scophthalmus maximus]
SMAX5B_017555	CP026243.1	5896001..5909640	10.1569	-1.0384	-2.05395	0.00311447	0.0675408	1	protein_coding	K01108//myotubularin [EC:3.1.3.64 3.1.3.95]	XP_035483117.1//myotubularin [Scophthalmus maximus]
SMAX5B_021892	CP026259.1	complement(7949564..7975756)	24.7926	-1.0409	-2.0575	0.000181417	0.0109806	1	protein_coding	K10413//dynein heavy chain 1, cytosolic	XP_035466876.1// cytoplasmic dynein 1 heavy chain 1-like [Scophthalmus maximus]
SMAX5B_016633	CP026244.1	complement(8042290..8046013)	249.051	-1.0425	-2.05979	0.000969796	0.0329782	1	protein_coding	K17284//perilipin-2	AWO97696.1//putative perilipin-2 [Scophthalmus maximus]
SMAX5B_008704	CP026257.1	complement(17417987..17426704)	57.6548	-1.04358	-2.06133	0.000358302	0.0172383	1	protein_coding	K12301//MFS transporter, ACS family, solute carrier family 17 (sodium-dependent inorganic phosphate cotransporter), member 5;K03231//elongation factor 1-alpha	XP_018517170.1//sialin isoform X2 [Lates calcarifer];XP_035461231.1//sialin [Scophthalmus maximus]
SMAX5B_003397	CP026259.1	16501323..16520879	7.49335	-1.04683	-2.06598	0.000640357	0.0246832	1	protein_coding	K21843//tetratricopeptide repeat protein 7	AWP16820.1//putative tetratricopeptide repeat protein 7B-like [Scophthalmus maximus]
SMAX5B_015708	CP026264.1	complement(2285032..2462949)	14.11	-1.05056	-2.07133	7.49008e-05	0.00581824	1	protein_coding	K19827//microtuble-actin crosslinking factor 1	AWP21285.1//putative microtubule-actin cross-linking factor 1 [Scophthalmus maximus]
SMAX5B_011323	CP026250.1	8906123..8938299	7.94036	-1.05306	-2.07492	0.00287195	0.0639907	1	protein_coding	K17544//TBC domain-containing protein kinase-like protein	AWP05497.1//putative TBC domain-containing protein kinase-like protein [Scophthalmus maximus]
SMAX5B_010634	CP026244.1	21548042..21563066	5.35521	-1.05523	-2.07805	0.00242455	0.0586498	1	protein_coding	K05724//FYVE, RhoGEF and PH domain containing 5/6	AWO98247.1//putative FYVE RhoGEF and PH domain-containing protein 6-like [Scophthalmus maximus]
SMAX5B_014733	CP026253.1	10576823..10580310	200.653	-1.05586	-2.07896	0.000393838	0.0184691	1	protein_coding	K03992//mannan-binding lectin serine protease 1 [EC:3.4.21.-]	XP_035502274.1//mannan-binding lectin serine protease 2 isoform X1 [Scophthalmus maximus]
SMAX5B_014605	CP026253.1	19785337..19813833	11.6986	-1.0569	-2.08046	0.00216925	0.0547041	1	protein_coding	K10659//E3 ubiquitin-protein ligase MARCH4/9/11 [EC:2.3.2.27];K21398//natural resistance-associated macrophage protein 2	AWP10060.1//putative natural resistance-associated macrophage protein 2-like [Scophthalmus maximus]
SMAX5B_015155	CP026258.1	complement(2792099..2797977)	10.3951	-1.0578	-2.08176	0.0010414	0.0345097	1	protein_coding	K14687//solute carrier family 31 (copper transporter), member 2	AWP14962.1//putative low affinity copper uptake protein 2 [Scophthalmus maximus]
SMAX5B_013868	CP026258.1	complement(15524749..15530344)	57.6222	-1.06077	-2.08605	0.000540519	0.0224845	1	protein_coding	K12475//disabled homolog 2	AWP15587.1//putative disabled -like 2 [Scophthalmus maximus]
SMAX5B_014999	CP026253.1	complement(10876270..10929961)	6.9697	-1.06108	-2.08649	8.91089e-05	0.00657293	1	protein_coding	K10392//kinesin family member 1	AWP09519.1//Kinesin-like protein isoform 2 [Scophthalmus maximus]
SMAX5B_017913	CP026257.1	complement(5371987..5401730)	15.4156	-1.06222	-2.08815	0.00239376	0.0581684	1	protein_coding	K22403//zinc finger MIZ domain-containing protein	XP_035461700.1//zinc finger MIZ domain-containing protein 1a [Scophthalmus maximus]
SMAX5B_003284	CP026253.1	complement(9156567..9165128)	29.6874	-1.06367	-2.09024	0.00544676	0.095355	1	protein_coding	K13303//serum/glucocorticoid-regulated kinase 2 [EC:2.7.11.1]	AWP09435.1//Serine/threonine-protein kinase Sgk2 [Scophthalmus maximus]
SMAX5B_020357	CP026260.1	complement(9772743..9818638)	1.18031	-1.06695	-2.095	0.00717367	0.111868	1	protein_coding	K16913//proline-, glutamic acid- and leucine-rich protein 1;K21958//extracellular serine/threonine protein kinase FAM20C [EC:2.7.11.1];K23573//dentin sialophosphoprotein	AWP17452.1//putative BAH and coiled-coil domain-containing protein 1-like [Scophthalmus maximus]
SMAX5B_000002	CP026262.1	complement(18554346..18565202)	5.63376	-1.06731	-2.09553	0.00787787	0.119246	1	protein_coding	K08220//MFS transporter, FLVCR family, feline leukemia virus subgroup C receptor-related protein	XP_035473266.1//feline leukemia virus subgroup C receptor-related protein 1 isoform X1 [Scophthalmus maximus]
SMAX5B_012377	CP026246.1	complement(4684614..4705432)	34.5386	-1.06958	-2.09882	0.00109091	0.0355946	1	protein_coding	K20279//synaptojanin [EC:3.1.3.36]	AWO99763.1//putative synaptojanin-1 [Scophthalmus maximus]
SMAX5B_015951	CP026259.1	19480692..19532030	4.04339	-1.07099	-2.10087	0.00196428	0.0511343	1	protein_coding	K19511//peroxidase [EC:1.11.1.7]	XP_035466187.1//peroxidasin isoform X1 [Scophthalmus maximus]
SMAX5B_006066	CP026249.1	complement(13030383..13044642)	19.1018	-1.0751	-2.10686	0.00443101	0.084397	1	protein_coding	K15116//solute carrier family 25, member 33/36	XP_035489986.1//solute carrier family 25 member 36-A [Scophthalmus maximus]
SMAX5B_014662	CP026253.1	12118045..12128649	5.43928	-1.07648	-2.10889	0.00678152	0.108088	1	protein_coding	K09045//activating transcription factor 7	XP_035500574.1//cyclic AMP-dependent transcription factor ATF-7a isoform X1 [Scophthalmus maximus]
SMAX5B_001583	CP026250.1	complement(20898390..20904752)	16.4962	-1.07755	-2.11045	0.00579225	0.0988716	1	protein_coding	K12462//Rho GDP-dissociation inhibitor	AWP06286.1//putative rho GDP-dissociation inhibitor 1-like [Scophthalmus maximus]
SMAX5B_016741	CP026244.1	19778400..19795166	5.69072	-1.07957	-2.1134	0.000425353	0.0195934	1	protein_coding	K08239//UDP-N-acetylglucosamine-lysosomal-enzyme [EC:2.7.8.17]	AWO98152.1//putative N-acetylglucosamine-1-phosphotransferase subunits alpha/beta [Scophthalmus maximus]
SMAX5B_008398	CP026245.1	4184589..4189151	4.80151	-1.07974	-2.11365	0.00985802	0.136229	1	protein_coding	K10369//supervillin;K14972//PAX-interacting protein 1;K11722//bromodomain-containing protein 4	AWO98542.1//putative protein FAM222B-like [Scophthalmus maximus]
SMAX5B_022711	CP026243.1	8084167..8159514	1.21921	-1.07983	-2.11379	0.0086846	0.125767	1	protein_coding	K18080//tensin	XP_035482963.1//tensin isoform X7 [Scophthalmus maximus]
SMAX5B_018625	CP026256.1	complement(10131112..10136132)	49.0191	-1.08147	-2.11619	2.60881e-05	0.00271107	0.450828	protein_coding	K11988//sonic hedgehog;K11989//indian hedgehog	XP_035460029.1//indian hedgehog B protein-like [Scophthalmus maximus]
SMAX5B_013705	CP026243.1	complement(31603901..31620151)	5.68813	-1.08392	-2.11978	0.000578985	0.0231525	1	protein_coding	K12166//E3 ubiquitin-protein ligase HACE1 [EC:2.3.2.26]	AWO97172.1//putative E3 ubiquitin-protein ligase HACE1-like [Scophthalmus maximus]
SMAX5B_001310	CP026262.1	complement(1130259..1142184)	42.5716	-1.08646	-2.12353	4.64894e-05	0.00410814	0.803383	protein_coding	K01611//S-adenosylmethionine decarboxylase [EC:4.1.1.50]	XP_035473024.1//S-adenosylmethionine decarboxylase proenzyme [Scophthalmus maximus]
SMAX5B_009701	CP026262.1	1827923..1872090	16.1013	-1.0941	-2.13479	0.000525517	0.0221639	1	protein_coding	K01794//chondroitin-glucuronate 5-epimerase [EC:5.1.3.19]	AWP19602.1//putative dermatan-sulfate epimerase [Scophthalmus maximus]
SMAX5B_019061	CP026255.1	15600298..15603807	3.26514	-1.0941	-2.13479	0.00800447	0.120067	1	protein_coding	K08523//heparin-binding EGF-like growth factor	XP_035506325.1//heparin-binding EGF-like growth factor a [Scophthalmus maximus]
SMAX5B_009834	CP026252.1	complement(13724159..13759332)	2.77757	-1.09796	-2.14052	0.00904901	0.128748	1	protein_coding	K09260//MADS-box transcription enhancer factor 2A	AWP08505.1//putative myocyte-specific enhancer factor 2A [Scophthalmus maximus]
SMAX5B_002584	CP026243.1	complement(14650792..14661816)	11.9376	-1.0981	-2.14073	0.00531454	0.0943114	1	protein_coding	K16312//serine/threonine-protein kinase 40 [EC:2.7.11.1]	AWO96183.1//Serine/threonine-protein kinase 40 [Scophthalmus maximus]
SMAX5B_005075	CP026252.1	complement(6754040..6760782)	7.84561	-1.09958	-2.14293	0.00447541	0.085118	1	protein_coding	K18849//25S rRNA (adenine2142-N1)-methyltransferase [EC:2.1.1.286]	XP_018531438.1//probable methyltransferase BTM2 homolog isoform X1 [Lates calcarifer]
SMAX5B_008530	CP026257.1	12744523..12754791	4.33143	-1.09958	-2.14293	0.00720251	0.112183	1	protein_coding	K12484//Rab11 family-interacting protein 1/2/5	AWP14342.1//putative rab11 family-interacting protein 2-like [Scophthalmus maximus]
SMAX5B_004468	CP026244.1	complement(965838..972288)	317.815	-1.1038	-2.14919	0.00252626	0.0599952	1	protein_coding	K10159//toll-like receptor 2	AMQ35497.1//Toll-like receptor 2 [Scophthalmus maximus]
SMAX5B_018362	CP026256.1	complement(10340832..10377250)	2.20217	-1.11181	-2.16116	0.00449616	0.0852629	1	protein_coding	K05637//laminin, alpha 1/2;K23222//nuclease HARBI1 [EC:3.1.-.-]	XP_027878978.1//disco-interacting protein 2 homolog A isoform X8 [Xiphophorus couchianus]
SMAX5B_004021	CP026246.1	complement(13147986..13158959)	8.1951	-1.11247	-2.16215	0.00159456	0.0454241	1	protein_coding	K01115//phospholipase D1/2 [EC:3.1.4.4]	XP_035483148.1//phospholipase D2 [Scophthalmus maximus]
SMAX5B_005777	CP026249.1	complement(11781566..11788670)	30.8012	-1.11437	-2.16501	0.000125609	0.00849823	1	protein_coding	K15085//solute carrier family 25, member 42	XP_035489649.1//mitochondrial coenzyme A transporter SLC25A42 [Scophthalmus maximus]
SMAX5B_017838	CP026252.1	complement(20649810..20667584)	3.10232	-1.1172	-2.16926	0.00894096	0.12777	1	protein_coding	K15379//solute carrier family 45, member 3	AWP08841.1//putative solute carrier family 45 member 3-like [Scophthalmus maximus]
SMAX5B_019568	CP026262.1	complement(14054718..14098954)	16.2136	-1.11871	-2.17153	4.40471e-06	0.000681157	0.0761178	protein_coding	K13144//integrator complex subunit 7;K13514//lysophosphatidylglycerol acyltransferase 1 [EC:2.3.1.-]	AWP20186.1//putative integrator complex subunit 7-like [Scophthalmus maximus]
SMAX5B_006678	CP026261.1	complement(6083670..6097027)	13.9868	-1.12058	-2.17434	0.000549969	0.0225917	1	protein_coding	K09107//sterol regulatory element-binding transcription factor 2	AWP18559.1//putative sterol regulatory element-binding protein 2-like [Scophthalmus maximus]
SMAX5B_020125	CP026260.1	complement(6556725..6588844)	13.917	-1.12122	-2.17531	0.00339073	0.0705452	1	protein_coding	K20317//c-Jun-amino-terminal kinase-interacting protein 4	XP_035467612.1//C-Jun-amino-terminal kinase-interacting protein 4 isoform X4 [Scophthalmus maximus]
SMAX5B_000034	CP026262.1	complement(16372196..16446795)	0.912597	-1.12338	-2.17857	0.0012033	0.0378471	1	protein_coding	K19346//nesprin-2	AWP20311.1//putative nesprin-2-like [Scophthalmus maximus]
SMAX5B_017824	CP026252.1	complement(20868090..20873705)	30.7993	-1.12644	-2.18319	0.000607895	0.023929	1	protein_coding	K05625//transglutaminase 2 [EC:2.3.2.13]	AWP08862.1//Protein-glutamine gamma-glutamyltransferase 2 [Scophthalmus maximus]
SMAX5B_007183	CP026249.1	complement(2362219..2412817)	14.0861	-1.1265	-2.18328	5.80578e-05	0.00483443	1	protein_coding	K10369//supervillin;K01068//acyl-coenzyme A thioesterase 1/2/4 [EC:3.1.2.2]	AWP03645.1//putative supervillin-like [Scophthalmus maximus]
SMAX5B_002364	CP026248.1	13159576..13182607	18.9031	-1.12667	-2.18354	0.000570196	0.0230026	1	protein_coding	K01490//AMP deaminase [EC:3.5.4.6]	XP_035486944.1//AMP deaminase 2-like isoform X2 [Scophthalmus maximus]
SMAX5B_005088	CP026252.1	5455250..5463676	12.2759	-1.13211	-2.19179	0.000551875	0.0225917	1	protein_coding	K01809//mannose-6-phosphate isomerase [EC:5.3.1.8]	AWP08013.1//putative mannose-6-phosphate isomerase [Scophthalmus maximus]
SMAX5B_003785	CP026244.1	complement(3496444..3577716)	4.0003	-1.13361	-2.19407	0.00116923	0.0372262	1	protein_coding	K17495//CUB and sushi domain-containing protein	AWO97474.1//putative sushi von Willebrand factor type A EGF and pentraxin domain-containing protein 1 [Scophthalmus maximus]
SMAX5B_019001	CP026255.1	2626406..2646044	13.691	-1.14	-2.20381	0.000126861	0.00853845	1	protein_coding	K12306//MFS transporter, FLVCR family, MFS-domain-containing protein 7	AWP11660.1//putative major facilitator superfamily domain-containing protein 7 [Scophthalmus maximus]
SMAX5B_018293	CP026256.1	complement(14118376..14121015)	39.682	-1.1412	-2.20565	9.80315e-06	0.00120423	0.169408	protein_coding	K04304//C-X-C chemokine receptor type 7 (atypical chemokine receptor 3)	XP_035460225.1//atypical chemokine receptor 3a [Scophthalmus maximus]
SMAX5B_003544	CP026258.1	complement(9653680..9659499)	14.3722	-1.14127	-2.20574	0.00133599	0.0408341	1	protein_coding	K17981//mitochondrial fission process protein 1	XP_035465147.1//mitochondrial fission process protein 1 [Scophthalmus maximus]
SMAX5B_017938	CP026257.1	8797301..8809441	4.35028	-1.14185	-2.20664	3.66278e-05	0.00345667	0.632965	protein_coding	K15333//tRNA guanosine-2'-O-methyltransferase [EC:2.1.1.34]	AWP14139.1//putative methyltransferase TARBP1 [Scophthalmus maximus]
SMAX5B_010306	CP026251.1	19299891..19309780	73.9817	-1.14391	-2.20979	0.000654227	0.0250691	1	protein_coding	K12384//lysosome membrane protein 2	XP_023143891.1//lysosome membrane protein 2a isoform X1 [Amphiprion ocellaris]
SMAX5B_004314	CP026246.1	15843263..15849396	5.76271	-1.148	-2.21607	0.00489931	0.0900171	1	protein_coding	K08552//estrogen-related receptor alpha	AWP00356.1//putative steroid hormone receptor ERR1 [Scophthalmus maximus]
SMAX5B_013780	CP026258.1	11149151..11191049	1.4498	-1.1504	-2.21976	0.00768061	0.117378	1	protein_coding	K09228//KRAB domain-containing zinc finger protein	AWP15370.1//putative zinc finger protein 462 [Scophthalmus maximus]
SMAX5B_013978	CP026258.1	complement(10784608..10825156)	40.6685	-1.15855	-2.23233	0.00031546	0.0158818	1	protein_coding	K06526//endoglin	AWP15350.1//putative endoglin [Scophthalmus maximus]
SMAX5B_009755	CP026252.1	complement(13943153..13961811)	7.04073	-1.1648	-2.24202	0.00627748	0.103093	1	protein_coding	K03900//von Willebrand factor	AWP08513.1//putative von Willebrand factor [Scophthalmus maximus]
SMAX5B_000329	CP026259.1	12383843..12386501	24.6739	-1.17263	-2.25422	0.00181842	0.0490794	1	protein_coding	K10104//ficolin;K05466//angiopoietin 2	AWP16636.1//putative fibrinogen-like protein 1 [Scophthalmus maximus]
SMAX5B_005988	CP026249.1	complement(12441759..12449224)	19.1187	-1.17982	-2.26548	0.00154876	0.0445098	1	protein_coding	K16062//C-C motif chemokine 21;K21097//C-C motif chemokine 24	ABC69051.1//chemokine CC-like protein, partial [Scophthalmus maximus]
SMAX5B_002067	CP026263.1	complement(2523572..2528176)	9.39983	-1.18019	-2.26606	0.00282061	0.0633906	1	protein_coding	K02145//V-type H+-transporting ATPase subunit A [EC:7.1.2.2]	AWP20629.1//V-type proton ATPase catalytic subunit A [Scophthalmus maximus]
SMAX5B_010442	CP026251.1	complement(17430948..17466257)	3.76118	-1.18074	-2.26692	0.00558998	0.0965585	1	protein_coding	K12459//SH2B adaptor protein 1/3	AWP07353.1//putative SH2B adapter protein 3-like [Scophthalmus maximus]
SMAX5B_017657	CP026254.1	complement(18721887..18728090)	21.509	-1.18182	-2.26863	0.00017833	0.0109787	1	protein_coding	K05607//methylglutaconyl-CoA hydratase [EC:4.2.1.18]	XP_035503162.1//enoyl-CoA hydratase domain-containing protein 2, mitochondrial [Scophthalmus maximus]
SMAX5B_012681	CP026247.1	complement(13431222..13451279)	22.6421	-1.1872	-2.2771	8.83624e-05	0.00657293	1	protein_coding	K11841//ubiquitin carboxyl-terminal hydrolase 10 [EC:3.4.19.12]	XP_035483719.1//ubiquitin carboxyl-terminal hydrolase 10 isoform X1 [Scophthalmus maximus]
SMAX5B_019421	CP026262.1	complement(3520419..3528179)	20.4215	-1.18748	-2.27754	0.000407315	0.0188965	1	protein_coding	K14386//solute carrier family 5 (sodium-dependent multivitamin transporter), member 6	AWP19637.1//putative sodium-dependent multivitamin transporter [Scophthalmus maximus]
SMAX5B_006162	CP026249.1	complement(8307297..8315944)	8.14548	-1.18898	-2.27991	1.09143e-05	0.00128888	0.188611	protein_coding	K13185//ATP-dependent RNA helicase DHX30 [EC:3.6.4.13]	AWP03993.1//putative ATP-dependent RNA helicase DHX30-like [Scophthalmus maximus]
SMAX5B_018588	CP026256.1	17659136..17684789	3.3781	-1.1894	-2.28057	0.0033341	0.0701945	1	protein_coding	K10955//mucin-2;K23573//dentin sialophosphoprotein	AWP13447.1//putative sperm-specific antigen 2 [Scophthalmus maximus]
SMAX5B_016676	CP026260.1	complement(3746645..3816106)	1.07393	-1.19379	-2.28753	0.00346608	0.0712448	1	protein_coding	K04131//muscarinic acetylcholine receptor M3;K09228//KRAB domain-containing zinc finger protein;K02184//formin 2	AWP17162.1//putative zinc finger protein 518A-like [Scophthalmus maximus]
SMAX5B_014305	CP026248.1	14183455..14187283	31.09	-1.19464	-2.28887	3.20214e-06	0.000526529	0.0553361	protein_coding	K00731//glycoprotein-N-acetylgalactosamine 3-beta-galactosyltransferase [EC:2.4.1.122]	XP_035486345.1//glycoprotein-N-acetylgalactosamine 3-beta-galactosyltransferase 1-B [Scophthalmus maximus]
SMAX5B_012671	CP026247.1	13943422..13966744	15.5358	-1.19562	-2.29043	0.000199448	0.0115148	1	protein_coding	K10591//E3 ubiquitin-protein ligase NEDD4 [EC:2.3.2.26]	XP_035483948.1//E3 ubiquitin-protein ligase NEDD4a isoform X2 [Scophthalmus maximus]
SMAX5B_002632	CP026253.1	complement(6943805..6945085)	47.5703	-1.19609	-2.29117	0.000196935	0.0115148	1	protein_coding	K09664//beta-1,3-N-acetylglucosaminyltransferase 7 [EC:2.4.1.-]	XP_035500882.1//UDP-GlcNAc:betaGal beta-1,3-N-acetylglucosaminyltransferase 7, like [Scophthalmus maximus]
SMAX5B_008426	CP026245.1	complement(2672333..2743228)	5.93956	-1.19755	-2.2935	0.000163573	0.0103649	1	protein_coding	K04550//low-density lipoprotein receptor-related protein 1 (alpha-2-macroglobulin receptor);K06233//low density lipoprotein-related protein 2	XP_030600044.1//sortilin-related receptor isoform X3 [Archocentrus centrarchus]
SMAX5B_011481	CP026250.1	3189361..3203171	11.6361	-1.19763	-2.29362	0.000929855	0.0319843	1	protein_coding	K17386//platelet-derived growth factor subunit B	AWP05226.1//putative platelet-derived growth factor subunit B [Scophthalmus maximus]
SMAX5B_004324	CP026246.1	8849444..8882233	5.438	-1.19876	-2.29542	0.00182431	0.0490794	1	protein_coding	K20400//folliculin-interacting protein 1	AWP00015.1//putative folliculin-interacting protein 1 [Scophthalmus maximus]
SMAX5B_012746	CP026253.1	8691502..8715608	5.10452	-1.2002	-2.29771	0.00514096	0.0927539	1	protein_coding	K00473//procollagen-lysine,2-oxoglutarate 5-dioxygenase 1 [EC:1.14.11.4]	XP_035499660.1//procollagen-lysine,2-oxoglutarate 5-dioxygenase 1 isoform X1 [Scophthalmus maximus]
SMAX5B_011931	CP026243.1	21917752..21928099	5.27689	-1.20482	-2.30508	0.00238986	0.0581684	1	protein_coding	K08117//amyloid-like protein 2	AWO96793.1//putative amyloid-like protein 1 [Scophthalmus maximus]
SMAX5B_021026	CP026261.1	8960265..8967220	9.24447	-1.20838	-2.31078	0.00562571	0.096664	1	protein_coding	K10486//BTB/POZ domain-containing protein 14	AWP18777.1//putative nucleus accumbens-associated protein 1-like [Scophthalmus maximus]
SMAX5B_005174	CP026248.1	6946173..6955568	2.50682	-1.21328	-2.31864	0.00789728	0.119269	1	protein_coding	K04513//Ras homolog gene family, member A;K07857//Ras homolog gene family, member C	AWP02473.1//Rho-related GTP-binding protein RhoC [Scophthalmus maximus]
SMAX5B_011086	CP026264.1	complement(13788019..13794193)	32.8165	-1.21341	-2.31885	6.29381e-06	0.000888659	0.108763	protein_coding	NA	AWP21905.1//putative transmembrane protein 106B-like [Scophthalmus maximus]
SMAX5B_010931	CP026251.1	7896482..7913396	18.8015	-1.21553	-2.32227	2.34947e-05	0.00246126	0.406012	protein_coding	K08576//calpain-7 [EC:3.4.22.-]	XP_035495965.1//phosphatidylinositol transfer protein beta isoform isoform X2 [Scophthalmus maximus]
SMAX5B_021027	CP026261.1	complement(14387703..14388725)	9.58466	-1.21999	-2.32945	0.00423124	0.0817913	1	protein_coding	K08431//G protein-coupled receptor 146	XP_035471534.1//probable G-protein coupled receptor 146 [Scophthalmus maximus]
SMAX5B_002098	CP026263.1	4675532..4680222	5.83372	-1.22634	-2.33973	0.00495028	0.0903147	1	protein_coding	K20028//palmitoyltransferase ZDHHC2/15/20 [EC:2.3.1.225]	XP_035474977.1//palmitoyltransferase ZDHHC20-like isoform X2 [Scophthalmus maximus]
SMAX5B_001540	CP026263.1	complement(9796293..9803693)	13.5349	-1.22702	-2.34084	0.000399327	0.0186592	1	protein_coding	K23573//dentin sialophosphoprotein;K19607//X-linked retinitis pigmentosa GTPase regulator	AWP20950.1//putative junctional protein associated with coronary artery disease [Scophthalmus maximus]
SMAX5B_004549	CP026245.1	complement(9678158..9685695)	43.4355	-1.22822	-2.34278	0.00025381	0.0139114	1	protein_coding	K19366//spartin	XP_035478184.1//spartin b isoform X3 [Scophthalmus maximus];XP_035478183.1//spartin b isoform X2 [Scophthalmus maximus]
SMAX5B_006051	CP026249.1	5292246..5296146	38.8233	-1.22866	-2.34349	0.00479955	0.0890659	1	protein_coding	K05614//solute carrier family 1 (glial high affinity glutamate transporter), member 3	AWP03798.1//putative excitatory amino acid transporter 1-like [Scophthalmus maximus]
SMAX5B_014506	CP026253.1	complement(20136150..20153389)	5.96251	-1.22915	-2.34429	0.000673485	0.0255806	1	protein_coding	K19947//F-actin monooxygenase [EC:1.14.13.225]	AWP10098.1//putative protein-methionine sulfoxide oxidase mical1-like [Scophthalmus maximus]
SMAX5B_013653	CP026246.1	complement(25303662..25355996)	19.4903	-1.23052	-2.34652	0.000103656	0.00739829	1	protein_coding	K06449//T-cell surface glycoprotein CD2;K06729//prostaglandin F2 receptor negative regulator	AWP00758.1//putative prostaglandin F2 receptor negative regulator [Scophthalmus maximus]
SMAX5B_002070	CP026263.1	complement(7032607..7046229)	32.93	-1.23071	-2.34682	1.88985e-06	0.000345954	0.0326585	protein_coding	K08585//calpain, invertebrate [EC:3.4.22.-];K08584//calpain, small subunit 2	XP_035475280.1//programmed cell death protein 6 isoform X1 [Scophthalmus maximus]
SMAX5B_002127	CP026243.1	complement(105487..121993)	18.8614	-1.23233	-2.34946	0.000127747	0.00855376	1	protein_coding	K23729;K06102//cingulin;K17570//hydrocephalus-inducing protein;K18626//trichohyalin;K23573//dentin sialophosphoprotein;K17785//mitofilin	AWO95486.1//putative leucine-rich repeat flightless-interacting protein 2-like [Scophthalmus maximus]
SMAX5B_019153	CP026255.1	complement(4164297..4181914)	3.19199	-1.23632	-2.35597	0.00941318	0.132192	1	protein_coding	K23404//transmembrane anterior posterior transformation protein 1	AWP11711.1//putative transmembrane anterior posterior transformation protein 1 -like [Scophthalmus maximus]
SMAX5B_006629	CP026249.1	complement(16465814..16471162)	14.0325	-1.23773	-2.35828	0.00142207	0.0422717	1	protein_coding	K02516//type II protein arginine methyltransferase [EC:2.1.1.320]	AWP04578.1//Protein arginine N-methyltransferase 5 [Scophthalmus maximus]
SMAX5B_008589	CP026257.1	14672972..14684544	10.1815	-1.23839	-2.35935	0.00142142	0.0422717	1	protein_coding	K05615//solute carrier family 1 (neutral amino acid transporter), member 4	XP_035461100.2//neutral amino acid transporter A [Scophthalmus maximus]
SMAX5B_004813	CP026246.1	complement(18195306..18209297)	5.43348	-1.24357	-2.36783	0.00137504	0.0415389	1	protein_coding	NA	AWP00477.1//putative C2 domain-containing protein 2 [Scophthalmus maximus]
SMAX5B_002028	CP026250.1	19072037..19079030	6.17191	-1.24631	-2.37233	0.00482116	0.0892307	1	protein_coding	K09059//nuclear factor, interleukin 3 regulated	XP_035493376.1//nuclear factor, interleukin 3 regulated, member 5 [Scophthalmus maximus]
SMAX5B_011018	CP026251.1	8533696..8549996	53.1427	-1.2484	-2.37578	6.80891e-06	0.000940933	0.117665	protein_coding	K00820//glutamine---fructose-6-phosphate transaminase (isomerizing) [EC:2.6.1.16]	XP_035495222.1//glutamine--fructose-6-phosphate aminotransferase [isomerizing] 1 [Scophthalmus maximus]
SMAX5B_004033	CP026246.1	complement(17224416..17252047)	6.17623	-1.24931	-2.37728	0.000121728	0.00835111	1	protein_coding	K12233//E3 ubiquitin-protein ligase HECTD3 [EC:2.3.2.26];K10595//E3 ubiquitin-protein ligase HERC2 [EC:2.3.2.26];K11970//cullin 9	AWP00447.1//putative zinc finger ZZ-type and EF-hand domain-containing protein 1 [Scophthalmus maximus]
SMAX5B_012383	CP026247.1	8988323..9012378	13.3076	-1.25363	-2.38441	0.00124877	0.039088	1	protein_coding	K23605//mothers against decapentaplegic homolog 3	XP_035484361.1//mothers against decapentaplegic homolog 3 [Scophthalmus maximus]
SMAX5B_010307	CP026251.1	complement(16053249..16076464)	4.00022	-1.25426	-2.38546	0.00322164	0.0689441	1	protein_coding	K15636//phosphoglucomutase-like protein 5	XP_029018995.1//phosphoglucomutase-like protein 5 [Betta splendens]
SMAX5B_019567	CP026262.1	13469765..13475989	12.6142	-1.25463	-2.38606	0.000458627	0.0202752	1	protein_coding	K01322//prolyl oligopeptidase [EC:3.4.21.26]	XP_031177909.1//prolyl endopeptidase [Sander lucioperca]
SMAX5B_011768	CP026243.1	23388199..23434663	8.51769	-1.25597	-2.38827	0.000278754	0.014654	1	protein_coding	K20128//metastasis suppressor protein 1	XP_035485703.1//protein MTSS 1-like isoform X1 [Scophthalmus maximus]
SMAX5B_010621	CP026244.1	complement(3060825..3076104)	58.6634	-1.26304	-2.40002	1.83389e-06	0.000345249	0.0316914	protein_coding	K01367//calpain-1 [EC:3.4.22.52]	XP_023252626.1//calpain-1 catalytic subunit-like [Seriola lalandi dorsalis]
SMAX5B_015115	CP026258.1	5598659..5605305	20.8833	-1.26656	-2.40587	0.00134773	0.0408651	1	protein_coding	K04459//dual specificity MAP kinase phosphatase [EC:3.1.3.16 3.1.3.48]	AWP15056.1//putative dual specificity protein phosphatase 4 [Scophthalmus maximus]
SMAX5B_005107	CP026252.1	5322544..5360739	4.39183	-1.26862	-2.4093	0.00154548	0.0445098	1	protein_coding	K13024//inositol-hexakisphosphate/diphosphoinositol-pentakisphosphate 1-kinase [EC:2.7.4.24]	XP_008292110.1//inositol hexakisphosphate and diphosphoinositol-pentakisphosphate kinase 1-like isoform X1 [Stegastes partitus]
SMAX5B_009471	CP026252.1	24447999..24501098	6.90532	-1.26902	-2.40998	3.64466e-06	0.000574864	0.0629834	protein_coding	K06245//laminin, beta 4;K04837//voltage-gated sodium channel type IV alpha	AWP09069.1//putative laminin subunit beta-4-like isoform 2 [Scophthalmus maximus]
SMAX5B_014239	CP026248.1	17169282..17311263	1.87366	-1.27746	-2.42412	0.00264776	0.0615667	1	protein_coding	K06820//plexin A	XP_018533147.1//plexin-A1 [Lates calcarifer]
SMAX5B_000734	CP026245.1	22703248..22711140	8.28591	-1.27784	-2.42476	0.00294385	0.0653686	1	protein_coding	K07747//beta-site APP-cleaving enzyme 2 (memapsin 1) [EC:3.4.23.45]	AWO99442.1//putative beta-secretase 2 [Scophthalmus maximus]
SMAX5B_018804	CP026251.1	3307792..3312623	6.07769	-1.27857	-2.42598	0.00474142	0.0882393	1	protein_coding	K12398//AP-3 complex subunit mu	AWP06576.1//putative AP-3 complex subunit mu-2-like
SMAX5B_018752	CP026251.1	958314..961741	225.333	-1.27935	-2.4273	0.000347592	0.0169715	1	protein_coding	K07818//perforin 1	XP_035495750.1//perforin-1 [Scophthalmus maximus]
SMAX5B_019109	CP026255.1	18985454..18993603	3.91318	-1.28058	-2.42936	0.00577005	0.0987523	1	protein_coding	K09553//stress-induced-phosphoprotein 1	AWP12488.1//putative LON peptidase N-terminal domain and RING finger protein 3 [Scophthalmus maximus]
SMAX5B_015138	CP026258.1	complement(4311443..4317121)	10.8631	-1.28158	-2.43105	0.00168032	0.0465402	1	protein_coding	K22267//starch-binding domain-containing protein 1	AWP15012.1//putative starch-binding domain-containing protein 1 [Scophthalmus maximus]
SMAX5B_001471	CP026244.1	complement(5676577..5694886)	20.0854	-1.28444	-2.43587	7.04986e-05	0.00565243	1	protein_coding	K10510//zinc finger and BTB domain-containing protein 38;K16777//neuralized-like protein 4	AWO97595.1//putative neuralized-like protein 4-like [Scophthalmus maximus]
SMAX5B_017770	CP026257.1	20163691..20166017	29.6624	-1.29569	-2.45494	0.00329257	0.0695456	1	protein_coding	K00079//carbonyl reductase 1 [EC:1.1.1.184 1.1.1.189 1.1.1.197]	AWP14653.1//putative carbonyl reductase [Scophthalmus maximus]
SMAX5B_001353	CP026252.1	8577389..8652938	1.8431	-1.29661	-2.4565	0.00796142	0.119698	1	protein_coding	K09609//a disintegrin and metalloproteinase with thrombospondin motifs 20 [EC:3.4.24.-]	AWP08154.1//putative disintegrin and metalloproteinase with thrombospondin motifs 20 [Scophthalmus maximus]
SMAX5B_012307	CP026247.1	14451345..14455242	4.93944	-1.30564	-2.47193	0.00422761	0.0817913	1	protein_coding	K01597//diphosphomevalonate decarboxylase [EC:4.1.1.33]	AWP01654.1//putative diphosphomevalonate decarboxylase [Scophthalmus maximus]
SMAX5B_012695	CP026246.1	4753687..4823061	2.43398	-1.30808	-2.47611	0.000305275	0.01568	1	protein_coding	K16507//protocadherin-16/23	AWO99766.1//putative protocadherin-16-like [Scophthalmus maximus]
SMAX5B_018638	CP026256.1	5344193..5371303	12.4611	-1.30829	-2.47649	1.9277e-05	0.00208673	0.333125	protein_coding	K14716//solute carrier family 39 (zinc transporter), member 10	AWP12802.1//putative zinc transporter ZIP10 [Scophthalmus maximus]
SMAX5B_001157	CP026256.1	complement(19701375..19704305)	26.5899	-1.31454	-2.48723	0.00197868	0.0513034	1	protein_coding	K23034//terminal nucleotidyltransferase 5C [EC:2.7.7.19]	XP_032372076.1//terminal nucleotidyltransferase 5C [Etheostoma spectabile]
SMAX5B_019211	CP026255.1	5092588..5224431	1.39829	-1.31679	-2.49111	0.000815917	0.0291175	1	protein_coding	K10955//mucin-2;K21125//mucin-5AC	XP_022615609.1//teneurin-3 [Seriola dumerili]
SMAX5B_013092	CP026247.1	21675230..21701634	6.32396	-1.31768	-2.49265	0.00231175	0.0566596	1	protein_coding	K16682//LIM domain-containing protein	AWP01922.1//putative Wilms tumor protein 1-interacting protein [Scophthalmus maximus]
SMAX5B_020616	CP026260.1	complement(20448689..20477267)	11.6121	-1.31934	-2.49551	0.000343443	0.0168352	1	protein_coding	K05627//BAI1-associated protein 2	AWP18165.1//putative brain-specific angiogenesis inhibitor 1-associated protein 2-like [Scophthalmus maximus]
SMAX5B_020526	CP026260.1	18414874..18500415	1.50073	-1.32046	-2.49745	0.00162354	0.0455504	1	protein_coding	K21440//ankyrin repeat domain-containing protein 50	XP_035468224.1//protein TANC2 isoform X8 [Scophthalmus maximus]
SMAX5B_000258	CP026259.1	9042610..9048004	7.07794	-1.32195	-2.50003	0.000333528	0.0165364	1	protein_coding	K19874//selenoprotein N	AWP16415.1//putative selenoprotein N [Scophthalmus maximus]
SMAX5B_007125	CP026256.1	142645..188407	4.20106	-1.33198	-2.51748	7.30102e-05	0.00574789	1	protein_coding	K01425//glutaminase [EC:3.5.1.2]	XP_035460604.1//glutaminase kidney isoform, mitochondrial isoform X2 [Scophthalmus maximus]
SMAX5B_015863	CP026264.1	complement(2631298..2635978)	11.1564	-1.33863	-2.52911	0.000257509	0.013996	1	protein_coding	K12301//MFS transporter, ACS family, solute carrier family 17 (sodium-dependent inorganic phosphate cotransporter), member 5	AWP21301.1//putative sialin-like [Scophthalmus maximus]
SMAX5B_015458	CP026252.1	complement(23484025..23502229)	190.164	-1.34716	-2.54411	5.10117e-06	0.000761658	0.0881533	protein_coding	K14156//choline/ethanolamine kinase [EC:2.7.1.32 2.7.1.82]	XP_035498172.1//choline kinase alpha isoform X1 [Scophthalmus maximus]
SMAX5B_003857	CP026252.1	complement(190748..277635)	0.753332	-1.3491	-2.54754	0.00746764	0.114934	1	protein_coding	K10380//ankyrin;K10955//mucin-2;K21125//mucin-5AC	XP_035011853.1//cortactin-binding protein 2 [Hippoglossus stenolepis]
SMAX5B_000631	CP026245.1	22283873..22305698	6.27677	-1.35031	-2.54966	7.89279e-05	0.00596644	1	protein_coding	K04646//clathrin heavy chain	XP_012691661.2//clathrin heavy chain 1-like isoform X2 [Clupea harengus]
SMAX5B_021963	CP026259.1	complement(5886194..5919689)	2.15967	-1.36019	-2.56719	0.00781232	0.118673	1	protein_coding	K06115//spectrin beta	XP_022606012.1//spectrin beta chain, erythrocytic-like isoform X1 [Seriola dumerili]
SMAX5B_006692	CP026249.1	complement(12025512..12035551)	3.68446	-1.37195	-2.5882	0.00834363	0.122606	1	protein_coding	K08026//one cut domain, family member 1, hepatocyte nuclear factor 6	AWP04216.1//Homeobox protein cut-like [Scophthalmus maximus]
SMAX5B_008682	CP026257.1	16274551..16316417	4.85386	-1.37267	-2.58949	1.50065e-05	0.00170995	0.259328	protein_coding	K19559//latent transforming growth factor beta binding protein 1	XP_035461819.1//latent-transforming growth factor beta-binding protein 1 isoform X4 [Scophthalmus maximus]
SMAX5B_017934	CP026257.1	complement(7642220..7643808)	66.3159	-1.37345	-2.5909	0.00259014	0.0608802	1	protein_coding	K23573//dentin sialophosphoprotein	AWP14068.1//Hypothetical protein SMAX5B_017934 [Scophthalmus maximus]
SMAX5B_007869	CP026254.1	complement(21042898..21068934)	5.39089	-1.37724	-2.59772	0.000207435	0.0118704	1	protein_coding	K20994//Notch 2;K02599//Notch 1	AWP11437.1//putative sushi nidogen and EGF-like domain-containing protein 1 [Scophthalmus maximus]
SMAX5B_019559	CP026253.1	complement(23477245..23487739)	3.93245	-1.38029	-2.60321	0.000482166	0.0208578	1	protein_coding	K19029//6-phosphofructo-2-kinase / fructose-2,6-biphosphatase 2 [EC:2.7.1.105 3.1.3.46]	AWP10292.1//putative 6-phosphofructo-2-kinase/fructose-2-6-bisphosphatase 2-like [Scophthalmus maximus]
SMAX5B_013794	CP026258.1	12435274..12481018	2.36273	-1.3813	-2.60504	0.00169729	0.0467115	1	protein_coding	K06480//integrin alpha 1	XP_035463777.1//integrin alpha-1 [Scophthalmus maximus]
SMAX5B_008695	CP026261.1	15775874..15786538	4.45349	-1.38916	-2.61927	0.00529935	0.0941704	1	protein_coding	K08804//serine/threonine kinase 17 [EC:2.7.11.1]	XP_035469906.1//serine/threonine kinase 17a like [Scophthalmus maximus]
SMAX5B_000009	CP026262.1	16225615..16271067	0.650856	-1.39223	-2.62484	0.00833934	0.122606	1	protein_coding	K11542//protein CASC5;K08077//UDP-sugar diphosphatase [EC:3.6.1.45]	AWP20304.1//putative protein CASC5 [Scophthalmus maximus]
SMAX5B_003215	CP026247.1	complement(25345854..25351595)	2.16631	-1.39292	-2.62609	0.00834164	0.122606	1	protein_coding	K09228//KRAB domain-containing zinc finger protein	AWP02023.1//putative zinc finger protein 507 [Scophthalmus maximus]
SMAX5B_014210	CP026248.1	complement(16838858..16848551)	9.68657	-1.39367	-2.62746	0.00118335	0.0375836	1	protein_coding	K05625//transglutaminase 2 [EC:2.3.2.13]	XP_022601240.1//protein-glutamine gamma-glutamyltransferase 2-like [Seriola dumerili]
SMAX5B_012642	CP026247.1	16508028..16524090	0.687244	-1.39387	-2.62782	0.00456243	0.0862678	1	protein_coding	K11499//centromere protein F	AWP01751.1//putative centromere protein F [Scophthalmus maximus]
SMAX5B_004815	CP026246.1	18460923..18463930	3.0095	-1.40033	-2.63961	0.00629748	0.103158	1	protein_coding	K16769//cytoskeleton-associated protein 2	AWP00486.1//putative cytoskeleton-associated protein 2-like [Scophthalmus maximus]
SMAX5B_006098	CP026249.1	complement(12450930..12451477)	1701.62	-1.40083	-2.64054	4.85316e-05	0.00423105	0.838675	protein_coding	K14624//C-C motif chemokine 2;K16595//C-C motif chemokine 13;K16597//C-C motif chemokine 11;K21097//C-C motif chemokine 24	XP_035491765.1//regakine-1-like [Scophthalmus maximus]
SMAX5B_000327	CP026259.1	11627083..11648494	3.07213	-1.4084	-2.65442	0.00143067	0.0424302	1	protein_coding	K09033//jun dimerization protein 2;K08220//MFS transporter, FLVCR family, feline leukemia virus subgroup C receptor-related protein	AWP16594.1//putative feline leukemia virus subgroup C receptor-related protein 2-like [Scophthalmus maximus]
SMAX5B_010784	CP026243.1	complement(7103187..7108186)	38.9584	-1.41232	-2.66164	0.00086937	0.0304889	1	protein_coding	K01047//secretory phospholipase A2 [EC:3.1.1.4]	XP_035499692.1//group 3 secretory phospholipase A2 [Scophthalmus maximus]
SMAX5B_019471	CP026244.1	complement(6897630..6932864)	6.67935	-1.42192	-2.67942	5.50155e-06	0.00080937	0.0950723	protein_coding	K06095//multiple PDZ domain protein	AWO97643.1//putative multiple PDZ domain protein [Scophthalmus maximus]
SMAX5B_000871	CP026246.1	complement(30831895..30840713)	5.14737	-1.42434	-2.68391	0.000484787	0.0208578	1	protein_coding	K04732//interleukin-1 receptor-associated kinase 3 [EC:2.7.11.1]	AWP00988.1//putative interleukin-1 receptor-associated kinase 3 [Scophthalmus maximus]
SMAX5B_016601	CP026251.1	complement(14596139..14607020)	14.2556	-1.42872	-2.69208	2.15435e-05	0.00229385	0.372293	protein_coding	K05614//solute carrier family 1 (glial high affinity glutamate transporter), member 3	AWP07219.1//putative excitatory amino acid transporter 1-like
SMAX5B_022429	CP026254.1	9102611..9218378	0.79195	-1.42914	-2.69285	0.00639765	0.104168	1	protein_coding	K06778//receptor-type tyrosine-protein phosphatase S [EC:3.1.3.48]	XP_035503068.1//receptor-type tyrosine-protein phosphatase S isoform X9 [Scophthalmus maximus]
SMAX5B_008092	CP026258.1	21155284..21188220	4.33439	-1.43467	-2.7032	0.000484184	0.0208578	1	protein_coding	K12323//atrial natriuretic peptide receptor A [EC:4.6.1.2]	XP_035463428.1//atrial natriuretic peptide receptor 1-like isoform X1 [Scophthalmus maximus]
SMAX5B_020116	CP026260.1	complement(10169333..10179940)	3.06756	-1.43808	-2.7096	0.000669982	0.0255222	1	protein_coding	K17582//antigen KI-67	AWP17479.1//putative antigen KI-67 [Scophthalmus maximus]
SMAX5B_012194	CP026243.1	complement(25843772..25851489)	46.3504	-1.44704	-2.72648	5.4286e-07	0.000128214	0.00938116	protein_coding	K21841//TBC1 domain family member 24;K15430//tRNA (guanine10-N2)-methyltransferase [EC:2.1.1.214];K20634//Rho GTPase-activating protein 9;K02503//histidine triad (HIT) family protein;K12587//exosome complex component MTR3	AWO96956.1//Nuclear receptor coactivator 7 [Scophthalmus maximus]
SMAX5B_008437	CP026245.1	3217927..3227930	13.2277	-1.45345	-2.73862	9.91941e-06	0.00120423	0.171417	protein_coding	K01749//hydroxymethylbilane synthase [EC:2.5.1.61]	AWO98495.1//putative porphobilinogen deaminase [Scophthalmus maximus]
SMAX5B_013301	CP026245.1	complement(15232631..15280257)	2.39172	-1.45842	-2.74807	0.00314897	0.0680617	1	protein_coding	K20125//F-BAR and double SH3 domains protein	XP_035478114.1//F-BAR and double SH3 domains protein 2-like isoform X2 [Scophthalmus maximus]
SMAX5B_011554	CP026250.1	complement(8951080..8993955)	1.97488	-1.4802	-2.78988	0.00527472	0.0940161	1	protein_coding	K06824//nephronectin	XP_035492518.1//nephronectin a isoform X6 [Scophthalmus maximus]
SMAX5B_002421	CP026243.1	5030378..5041692	2.09799	-1.48458	-2.79836	0.00494571	0.0903147	1	protein_coding	K08620//a disintegrin and metalloproteinase with thrombospondin motifs 5 [EC:3.4.24.-]	XP_033472040.1//A disintegrin and metalloproteinase with thrombospondin motifs 5 [Epinephelus lanceolatus]
SMAX5B_006016	CP026249.1	3599310..3614764	3.65139	-1.49217	-2.81311	0.000279769	0.014654	1	protein_coding	K04679//MAD, mothers against decapentaplegic interacting protein	AWP03722.1//putative zinc finger FYVE domain-containing protein 9 [Scophthalmus maximus]
SMAX5B_009601	CP026264.1	complement(10869864..10928158)	5.17447	-1.49603	-2.82065	0.00220697	0.0550259	1	protein_coding	K04576//calcitonin receptor;K23087//tissue factor pathway inhibitor 2	AWP21805.1//putative calcitonin gene-related peptide type 1 receptor-like [Scophthalmus maximus]
SMAX5B_018551	CP026256.1	complement(13131167..13178458)	2.21729	-1.5221	-2.8721	0.00131222	0.0402702	1	protein_coding	K17477//FERM, RhoGEF and pleckstrin domain-containing protein 1	XP_035460164.1//FERM, ARHGEF and pleckstrin domain-containing protein 1-like isoform X2 [Scophthalmus maximus]
SMAX5B_001633	CP026263.1	complement(12442581..12454316)	8.34085	-1.53048	-2.88881	0.00183508	0.0491325	1	protein_coding	K01580//glutamate decarboxylase [EC:4.1.1.15]	XP_035475540.1//glutamate decarboxylase 2 isoform X1 [Scophthalmus maximus]
SMAX5B_011462	CP026250.1	8217821..8233693	1.19922	-1.53198	-2.89183	0.000479168	0.0208578	1	protein_coding	K22900//tRNA (adenine37-N6)-methyltransferase [EC:2.1.1.-];K21764//sperm-associated antigen 5	AWP05473.1//putative sperm-associated antigen 5 isoform 3 [Scophthalmus maximus]
SMAX5B_018937	CP026255.1	18616975..18641165	1.65421	-1.53291	-2.89369	0.00876054	0.126024	1	protein_coding	K12494//PH and SEC7 domain-containing protein	AWP12463.1//putative PH and SEC7 domain-containing protein 2 [Scophthalmus maximus]
SMAX5B_000237	CP026251.1	complement(21779524..21782129)	8.02244	-1.539	-2.90594	0.00193927	0.050891	1	protein_coding	K01024//[heparan sulfate]-glucosamine 3-sulfotransferase 1 [EC:2.8.2.23]	XP_035495194.1//heparan sulfate (glucosamine) 3-O-sulfotransferase 1-like 2 [Scophthalmus maximus]
SMAX5B_000148	CP026262.1	18718290..18742778	1.66948	-1.54197	-2.91191	9.57276e-05	0.00695512	1	protein_coding	K09239//human immunodeficiency virus type I enhancer-binding protein	XP_035474309.1//transcription factor HIVEP2a [Scophthalmus maximus]
SMAX5B_017484	CP026260.1	complement(15241958..15243456)	3.95395	-1.55381	-2.93592	0.00818744	0.121133	1	protein_coding	K01020//chondroitin 6-sulfotransferase 3 [EC:2.8.2.17]	XP_035468751.1//carbohydrate sulfotransferase 3-like [Scophthalmus maximus]
SMAX5B_009674	CP026264.1	complement(11354419..11362011)	2.0904	-1.55517	-2.93869	0.00406793	0.079582	1	protein_coding	K20732//transmembrane glycoprotein NMB	XP_035477207.1//protein QNR-71 [Scophthalmus maximus];AWP21833.1//putative transmembrane glycoprotein NMB [Scophthalmus maximus]
SMAX5B_005401	CP026244.1	13027547..13037768	13.9091	-1.56636	-2.96157	5.88605e-05	0.00487005	1	protein_coding	K05676//ATP-binding cassette, subfamily D (ALD), member 2	AWO97916.1//putative ATP-binding cassette sub-family D member 2 [Scophthalmus maximus]
SMAX5B_007150	CP026252.1	complement(4548240..4551215)	3.05173	-1.57988	-2.98946	0.00258271	0.0608802	1	protein_coding	K04503//G1/S-specific cyclin-D1	AWP07975.1//putative G1/S-specific cyclin-D1 [Scophthalmus maximus]
SMAX5B_017234	CP026255.1	52883..62234	2.84925	-1.58316	-2.99625	0.00242971	0.0586653	1	protein_coding	K00901//diacylglycerol kinase (ATP) [EC:2.7.1.107]	XP_018517555.1//diacylglycerol kinase theta-like [Lates calcarifer]
SMAX5B_017022	CP026246.1	complement(24407248..24422632)	6.29962	-1.58668	-3.00357	0.000914848	0.031606	1	protein_coding	K15010//homer	AWP00699.1//putative homer protein -like 1-like [Scophthalmus maximus]
SMAX5B_013065	CP026247.1	complement(17716085..17719382)	5.04069	-1.59423	-3.01933	0.00817127	0.121133	1	protein_coding	K20029//palmitoyltransferase ZDHHC3/7/25 [EC:2.3.1.225]	XP_035484258.1//palmitoyltransferase ZDHHC7 [Scophthalmus maximus]
SMAX5B_020819	CP026261.1	14048359..14056057	1.97842	-1.59703	-3.0252	0.00283806	0.0636726	1	protein_coding	K13201//nucleolysin TIA-1/TIAR;K13088//ELAV-like protein 1	AWP19119.1//putative ribonucleoprotein PTB-binding 1 [Scophthalmus maximus]
SMAX5B_012635	CP026247.1	complement(8756701..8764555)	21.2601	-1.59877	-3.02885	0.000224082	0.012601	1	protein_coding	K17449//SHC-transforming protein 4	AWP01368.1//putative SHC-transforming protein 4 [Scophthalmus maximus]
SMAX5B_021411	CP026244.1	9288652..9296158	12.8568	-1.60387	-3.03959	4.62733e-06	0.000707164	0.0799648	protein_coding	K01103//6-phosphofructo-2-kinase / fructose-2,6-biphosphatase 3 [EC:2.7.1.105 3.1.3.46]	XP_022604723.1//6-phosphofructo-2-kinase/fructose-2,6-bisphosphatase 3 isoform X1 [Seriola dumerili]
SMAX5B_015065	CP026258.1	2305646..2309583	3.8747	-1.62022	-3.07421	0.00467798	0.0874764	1	protein_coding	K05868//G2/mitotic-specific cyclin-B1	AWP14934.1//putative G2/mitotic-specific cyclin-B1 [Scophthalmus maximus]
SMAX5B_015948	CP026259.1	19577803..19581837	3.9503	-1.62661	-3.08786	0.00640724	0.104168	1	protein_coding	#N/A	AWP16938.1//putative absent in melanoma 1 protein [Scophthalmus maximus]
SMAX5B_011100	CP026264.1	13526052..13543882	1.73183	-1.62784	-3.09049	0.000161955	0.0103333	1	protein_coding	K18621//actin-binding protein anillin	XP_035476645.1//anillin isoform X5 [Scophthalmus maximus]
SMAX5B_013342	CP026245.1	complement(16033582..16047039)	0.802618	-1.64701	-3.13183	0.00328918	0.0695456	1	protein_coding	K16808//nuclear mitotic apparatus protein 1	AWO99139.1//putative nuclear mitotic apparatus protein 1 isoform 3 [Scophthalmus maximus]
SMAX5B_002970	CP026258.1	complement(507385..512941)	5.00139	-1.66672	-3.17492	0.000569408	0.0230026	1	protein_coding	K14684//solute carrier family 25 (mitochondrial phosphate transporter), member 23/24/25/41	XP_035523665.1//calcium-binding mitochondrial carrier protein SCaMC-2-B isoform X1 [Morone saxatilis]
SMAX5B_010106	CP026252.1	complement(10851826..10870733)	6.77683	-1.66932	-3.18065	9.58404e-05	0.00695512	1	protein_coding	K19498//anoctamin-3	XP_035498263.1//anoctamin-3 isoform X3 [Scophthalmus maximus]
SMAX5B_021848	CP026248.1	24265350..24300224	0.903787	-1.67277	-3.18825	0.00857524	0.1246	1	protein_coding	K06757//neurofascin	XP_023280495.1//neurofascin [Seriola lalandi dorsalis]
SMAX5B_014413	CP026257.1	448156..467969	2.05802	-1.67335	-3.18953	0.00400954	0.0791549	1	protein_coding	K18756//protein bicaudal C	AWP13743.1//putative protein bicaudal C -like 1 [Scophthalmus maximus]
SMAX5B_017897	CP026257.1	complement(8915582..8932436)	0.770068	-1.68389	-3.21292	0.00637093	0.103968	1	protein_coding	K04659//thrombospondin 2/3/4/5	XP_030012610.1//thrombospondin-2 isoform X1 [Sphaeramia orbicularis]
SMAX5B_008692	CP026257.1	16613437..16618586	4.68399	-1.68661	-3.21899	0.00325993	0.0695247	1	protein_coding	K02087//cyclin-dependent kinase 1 [EC:2.7.11.22 2.7.11.23]	XP_035462198.1//cyclin-dependent kinase 1 isoform X1 [Scophthalmus maximus]
SMAX5B_000015	CP026262.1	complement(16768897..16772376)	15.2471	-1.69782	-3.24411	2.72137e-05	0.00278351	0.47028	protein_coding	K10168//toll-like receptor 5	ANS71058.1//tlr5-a [Scophthalmus maximus]
SMAX5B_016483	CP026251.1	complement(13646949..13666275)	0.906849	-1.69956	-3.24802	0.00120748	0.0378869	1	protein_coding	K11577//kinetochore-associated protein 1	XP_035496343.1//kinetochore-associated protein 1 isoform X2 [Scophthalmus maximus]
SMAX5B_011806	CP026243.1	complement(16432632..16443007)	12.6894	-1.70019	-3.24943	1.21626e-07	3.67424e-05	0.00210182	protein_coding	K01312//trypsin [EC:3.4.21.4]	AWO96298.1//putative trypsinogen-like protein 3 [Scophthalmus maximus]
SMAX5B_022401	CP026254.1	complement(10070808..10097976)	1.82812	-1.70497	-3.26022	0.00221702	0.0551707	1	protein_coding	K05112//Eph receptor B3 [EC:2.7.10.1]	XP_029284966.1//ephrin type-B receptor 3 isoform X3 [Cottoperca gobio]
SMAX5B_017940	CP026257.1	9143041..9251122	0.700784	-1.70792	-3.26689	0.00606521	0.101069	1	protein_coding	K07377//neurexin	XP_034754932.1//neurexin-1a isoform X6 [Etheostoma cragini]
SMAX5B_010010	CP026252.1	11160873..11168019	3.88062	-1.72687	-3.31008	8.63063e-06	0.00115579	0.149146	protein_coding	K10130//leucine-rich repeats and death domain-containing protein	AWP08346.1//putative p53-induced protein with a death domain-like [Scophthalmus maximus]
SMAX5B_022471	CP026254.1	8117939..8158406	19.0798	-1.73457	-3.3278	2.32453e-06	0.000397321	0.0401703	protein_coding	K13293//cAMP-specific phosphodiesterase 4 [EC:3.1.4.53]	XP_035503577.1//cAMP-specific 3',5'-cyclic phosphodiesterase 4D-like isoform X7 [Scophthalmus maximus]
SMAX5B_015442	CP026252.1	complement(22392691..22402583)	188.497	-1.73799	-3.3357	2.74316e-07	6.987e-05	0.00474046	protein_coding	K01672//carbonic anhydrase [EC:4.2.1.1]	XP_035499414.1//carbonic anhydrase 5A, mitochondrial isoform X1 [Scophthalmus maximus]
SMAX5B_018025	CP026257.1	complement(7049787..7071702)	5.25814	-1.747	-3.35661	0.00689011	0.109149	1	protein_coding	K23855	AWP14026.1//putative Kv channel-interacting protein 2-like [Scophthalmus maximus]
SMAX5B_022178	CP026243.1	complement(10026824..10058240)	2.38836	-1.74811	-3.35917	0.000596905	0.0237119	1	protein_coding	K20173//RILP-like protein 1;K20040//huntingtin-interacting protein 1-related protein	AWO96006.1//putative RILP-like protein 1 [Scophthalmus maximus]
SMAX5B_021953	CP026259.1	7699659..7709718	5.06014	-1.74903	-3.36133	0.0011923	0.0377757	1	protein_coding	K04703//sprouty-related, EVH1 domain-containing protein	AWP16336.1//putative sprouty-related EVH1 domain-containing protein 1 [Scophthalmus maximus]
SMAX5B_015791	CP026264.1	2936588..2942849	2.6123	-1.75437	-3.3738	0.000383567	0.0180527	1	protein_coding	K10388//plectin	AWP21332.1//putative epiplakin-like [Scophthalmus maximus]
SMAX5B_005954	CP026261.1	5604910..5608574	12.8705	-1.77047	-3.41164	0.000250747	0.0138017	1	protein_coding	K15043//importin subunit alpha-1/8	XP_018554129.1//importin subunit alpha-1-like [Lates calcarifer]
SMAX5B_021971	CP026259.1	7925057..7929200	11.1084	-1.775	-3.42239	0.000461181	0.0202752	1	protein_coding	K10413//dynein heavy chain 1, cytosolic	XP_035466324.1//cytoplasmic dynein 1 heavy chain 1-like [Scophthalmus maximus]
SMAX5B_005765	CP026249.1	9894776..9898040	3.81778	-1.77605	-3.42486	0.00140684	0.0421079	1	protein_coding	K03363//cell division cycle 20, cofactor of APC complex	AWP04074.1//putative cell division cycle protein 20 -like [Scophthalmus maximus]
SMAX5B_022663	CP026254.1	complement(12157141..12206792)	0.991195	-1.77676	-3.42656	0.00261184	0.0610986	1	protein_coding	K23342//fibrillin 2/3	XP_035503625.1//fibrillin-2b [Scophthalmus maximus]
SMAX5B_000378	CP026259.1	12731992..12734415	3.19176	-1.78674	-3.45034	0.00198914	0.0514123	1	protein_coding	K07410//cytochrome P450 family 1 subfamily B polypeptide 1 [EC:1.14.14.1];K17812//cytochrome P450 family 1 subfamily C	XP_035466268.1//cytochrome P450 1B1-like isoform X1 [Scophthalmus maximus]
SMAX5B_017673	CP026254.1	complement(18828783..18836617)	3.04726	-1.81304	-3.51381	0.000144628	0.00944078	1	protein_coding	K15707//RING finger protein 170 [EC:2.3.2.27]	AWP11321.1//putative E3 ubiquitin-protein ligase RNF170-like [Scophthalmus maximus]
SMAX5B_015586	CP026264.1	complement(4202463..4246449)	1.77166	-1.84967	-3.60417	0.00544393	0.095355	1	protein_coding	K05465//angiopoietin 1	XP_035476714.1//angiopoietin-1 isoform X1 [Scophthalmus maximus]
SMAX5B_015578	CP026264.1	complement(3167025..3191864)	1.17659	-1.8574	-3.62355	0.00330518	0.0696986	1	protein_coding	K13858//solute carrier family 4 (sodium bicarbonate cotransporter), member 7	AWP21352.1//putative sodium-driven chloride bicarbonate exchanger-like [Scophthalmus maximus]
SMAX5B_014182	CP026248.1	complement(17637809..17677473)	0.375593	-1.90576	-3.74705	0.00153317	0.0442788	1	protein_coding	K16308//citron Rho-interacting kinase [EC:2.7.11.1];K10351//myosin regulatory light chain 2	XP_035487014.1//citron rho-interacting kinase isoform X3 [Scophthalmus maximus]
SMAX5B_016383	CP026253.1	23224507..23243361	1.51777	-1.93314	-3.81887	0.000563051	0.022928	1	protein_coding	K15008//discs, large-associated protein 1	AWP10280.1//putative disks large-associated protein 4-like [Scophthalmus maximus]
SMAX5B_012884	CP026246.1	28609601..28612989	4.21037	-1.93502	-3.82383	0.000842108	0.0298622	1	protein_coding	K10158//galactosylgalactosylxylosylprotein 3-beta-glucuronosyltransferase 3 [EC:2.4.1.135]	AWP00889.1//putative galactosylgalactosylxylosylprotein 3-beta-glucuronosyltransferase 3-like [Scophthalmus maximus]
SMAX5B_013804	CP026258.1	11979731..11980994	9.59503	-1.93981	-3.83655	0.000210352	0.0119845	1	protein_coding	K06776//receptor-type tyrosine-protein phosphatase kappa [EC:3.1.3.48];K23571//insulin-like growth factor-binding protein 9;K08784//HtrA serine peptidase 1 [EC:3.4.21.-];K08786//HtrA serine peptidase 4 [EC:3.4.21.-];K05693//receptor-type tyrosine-protein phosphatase mu [EC:3.1.3.48]	AWP15410.1//putative endothelial cell-specific molecule 1 [Scophthalmus maximus]
SMAX5B_010728	CP026260.1	complement(100794..134650)	40.1781	-1.94486	-3.85	1.54145e-07	4.35292e-05	0.00266378	protein_coding	K13855//solute carrier family 4 (anion exchanger), member 2	AWP17005.1//putative anion exchange protein 2 [Scophthalmus maximus]
SMAX5B_004241	CP026246.1	11801629..11823004	1.03578	-1.95234	-3.87002	0.002706	0.0619945	1	protein_coding	K23794	AWP00102.1//putative pleckstrin -likey-like domain family B member 2 [Scophthalmus maximus]
SMAX5B_016718	CP026244.1	19701332..19704217	2.1602	-2.01636	-4.04561	0.00610887	0.101476	1	protein_coding	K13999//cytoskeleton-associated protein 4	XP_035506084.1//cytoskeleton-associated protein 4 [Scophthalmus maximus]
SMAX5B_008517	CP026261.1	15899096..15958322	2.7477	-2.0266	-4.07443	0.000870776	0.0304889	1	protein_coding	K15370//inactive phospholipase C-like protein 2	XP_030263299.1//inactive phospholipase C-like protein 2 [Sparus aurata]
SMAX5B_011037	CP026251.1	9312451..9406869	2.09742	-2.03553	-4.09974	2.21247e-10	2.05286e-07	3.82337e-06	protein_coding	K18263//adhesion G-protein coupled receptor V1	XP_035494853.1//adhesion G-protein coupled receptor V1 [Scophthalmus maximus]
SMAX5B_015009	CP026253.1	complement(11821208..11825710)	5.69942	-2.04287	-4.12063	0.000553054	0.0225917	1	protein_coding	K01403//matrix metalloproteinase-9 (gelatinase B) [EC:3.4.24.35]	XP_035499947.1//matrix metalloproteinase-9 [Scophthalmus maximus]
SMAX5B_006194	CP026249.1	10398506..10407156	1.71495	-2.05313	-4.15005	0.000190698	0.0113113	1	protein_coding	K10393//kinesin family member 2/24	AWP04104.1//putative kinesin-like protein KIF2C [Scophthalmus maximus]
SMAX5B_018378	CP026256.1	complement(15975995..16103363)	0.996923	-2.07124	-4.20249	0.000668566	0.0255222	1	protein_coding	K10352//myosin heavy chain;K16464//centrosomal protein CEP250;K06835//disintegrin and metalloproteinase domain-containing protein 12 [EC:3.4.24.-]	AWP13365.1//putative filamin A-interacting protein 1-like [Scophthalmus maximus]
SMAX5B_001084	CP026248.1	complement(2718785..2722268)	43.1018	-2.07437	-4.2116	0.000954347	0.032538	1	protein_coding	K07937//ADP-ribosylation factor 1;K07939//ADP-ribosylation factor 4	AWP02268.1//ADP-ribosylation factor 4 [Scophthalmus maximus]
SMAX5B_007213	CP026260.1	21197049..21197705	10.8277	-2.0895	-4.25601	1.73348e-05	0.00192461	0.299563	protein_coding	NA	AWP18212.1//Hypothetical protein SMAX5B_007213 [Scophthalmus maximus]
SMAX5B_008520	CP026257.1	complement(19533059..19561752)	1.12729	-2.11132	-4.32085	4.97611e-05	0.00430931	0.859921	protein_coding	K10402//kinesin family member 20	XP_035462691.1//kinesin-like protein KIF20B [Scophthalmus maximus]
SMAX5B_010482	CP026251.1	complement(15773528..15779170)	444.791	-2.12477	-4.36134	5.65951e-08	1.88505e-05	0.00097802	protein_coding	K08861//polo-like kinase 2 [EC:2.7.11.21]	KAF0033969.1//hypothetical protein F2P81_014035 [Scophthalmus maximus]
SMAX5B_010320	CP026251.1	19979555..19986609	43.5156	-2.12495	-4.36187	6.01432e-07	0.000139511	0.0103934	protein_coding	K01301//N-acetylated-alpha-linked acidic dipeptidase [EC:3.4.17.21]	AWP07505.1//putative N-acetylated-alpha-linked acidic dipeptidase-like protein [Scophthalmus maximus]
SMAX5B_012809	CP026252.1	19117944..19150776	0.607539	-2.12851	-4.37265	0.00383416	0.0767422	1	protein_coding	K10955//mucin-2;K22016//mucin-3/17	XP_035498882.1//UPF0606 protein KIAA1549 [Scophthalmus maximus]
SMAX5B_012504	CP026247.1	complement(16367800..16370977)	19.8695	-2.1407	-4.40977	5.89845e-10	4.78881e-07	1.01931e-05	protein_coding	K07865//Ras homolog gene family, member U	AWP01732.1//putative rho-related GTP-binding protein RhoU-like [Scophthalmus maximus]
SMAX5B_001466	CP026244.1	5484177..5487809	1.15947	-2.14086	-4.41024	0.00338336	0.0705452	1	protein_coding	K13172//serine/arginine repetitive matrix protein 2	AWO97579.1//Ribosome biogenesis protein nep1 -like putative [Scophthalmus maximus]
SMAX5B_015615	CP026264.1	complement(7877184..7885837)	3.4732	-2.14798	-4.43206	0.00102254	0.0341459	1	protein_coding	K12387//lysosomal-associated transmembrane protein	XP_018553532.1//lysosomal-associated transmembrane protein 4B-like [Lates calcarifer]
SMAX5B_014326	CP026248.1	14379339..14411227	6.51462	-2.15433	-4.45163	9.7587e-11	9.7512e-08	1.6864e-06	protein_coding	K05637//laminin, alpha 1/2;K23222//nuclease HARBI1 [EC:3.1.-.-];K01904//4-coumarate--CoA ligase [EC:6.2.1.12]	XP_035486797.1//disco-interacting protein 2 homolog B-A isoform X3 [Scophthalmus maximus]
SMAX5B_000680	CP026245.1	19142711..19151008	2.61444	-2.18328	-4.54186	0.00621689	0.102745	1	protein_coding	K14622//retinol binding protein 2	XP_035479837.1//retinol-binding protein 2-like [Scophthalmus maximus]
SMAX5B_007224	CP026260.1	21042330..21057086	2.30593	-2.22019	-4.65955	0.0049177	0.0901	1	protein_coding	K09057//hepatic leukemia factor	AWP18197.1//putative hepatic leukemia factor-like [Scophthalmus maximus]
SMAX5B_007073	CP026244.1	complement(2340573..2373318)	1.13273	-2.23977	-4.72321	0.000837374	0.0298013	1	protein_coding	K10955//mucin-2;K00923//phosphatidylinositol-4-phosphate 3-kinase [EC:2.7.1.154];K01540//sodium/potassium-transporting ATPase subunit beta;K04437//filamin	AWO97378.1//putative NHS-like protein 2-like [Scophthalmus maximus]
SMAX5B_009684	CP026263.1	complement(14695071..14777182)	1.14266	-2.2432	-4.73447	0.000548891	0.0225917	1	protein_coding	K04838//voltage-gated sodium channel type V alpha	AWP21110.1//Sodium channel protein [Scophthalmus maximus]
SMAX5B_017326	CP026260.1	complement(15562283..15566662)	1.58037	-2.25157	-4.762	0.000311984	0.015794	1	protein_coding	K00457//4-hydroxyphenylpyruvate dioxygenase [EC:1.13.11.27]	AWP17885.1//4-hydroxyphenylpyruvate dioxygenase-like protein [Scophthalmus maximus]
SMAX5B_007592	CP026250.1	11000851..11010736	0.53985	-2.25868	-4.78555	0.00401756	0.0791928	1	protein_coding	K16315//serine/threonine-protein kinase haspin [EC:2.7.11.1]	AWP05628.1//putative serine/threonine-protein kinase haspin [Scophthalmus maximus]
SMAX5B_019650	CP026262.1	complement(11665706..11668034)	8.3575	-2.29502	-4.90762	2.26542e-06	0.000397321	0.0391487	protein_coding	NA	XP_035473060.1//coiled-coil domain-containing protein 167 [Scophthalmus maximus]
SMAX5B_012143	CP026243.1	complement(20690473..20693298)	1.85429	-2.31304	-4.96928	0.0032818	0.0695442	1	protein_coding	NA	AWO96683.1//Hypothetical protein SMAX5B_012143 [Scophthalmus maximus]
SMAX5B_010951	CP026251.1	complement(7284656..7287003)	1.59308	-2.36447	-5.14965	0.00464203	0.0873725	1	protein_coding	K16931//steroidogenic acute regulatory protein, mitochondrial	XP_035495069.1//steroidogenic acute regulatory protein, mitochondrial [Scophthalmus maximus]
SMAX5B_011995	CP026243.1	20601871..20636378	0.786522	-2.36472	-5.15054	0.00536819	0.0947456	1	protein_coding	K06584//integrin alpha 8	AWO96674.1//putative integrin alpha-8 [Scophthalmus maximus]
SMAX5B_018550	CP026256.1	complement(10218495..10233202)	0.357355	-2.38975	-5.24066	0.00689922	0.109161	1	protein_coding	K10955//mucin-2	XP_026151223.1//matrix-remodeling-associated protein 5-like isoform X1 [Mastacembelus armatus]
SMAX5B_011888	CP026243.1	complement(16836939..16844647)	0.476111	-2.46085	-5.5054	0.00342097	0.0709879	1	protein_coding	K06499//carcinoembryonic antigen-related cell adhesion molecule	AWO96335.1//putative carcinoembryonic antigen-related cell adhesion molecule 5-like [Scophthalmus maximus]
SMAX5B_008360	CP026249.1	complement(1108065..1109522)	30.8705	-2.51061	-5.69859	6.80299e-07	0.000155037	0.0117562	protein_coding	K10955//mucin-2;K04377//Myc proto-oncogene protein	AWP03609.1//putative myc proto-oncogene protein-like [Scophthalmus maximus]
SMAX5B_012241	CP026246.1	complement(647810..649807)	105.895	-2.52433	-5.75307	1.03656e-08	4.8881e-06	0.000179128	protein_coding	K09228//KRAB domain-containing zinc finger protein	AWO99602.1//putative early growth response protein 1-like [Scophthalmus maximus]
SMAX5B_002978	CP026258.1	1196112..1202147	1.30295	-2.55132	-5.86169	0.00460124	0.0868751	1	protein_coding	K19607//X-linked retinitis pigmentosa GTPase regulator;K23573//dentin sialophosphoprotein;K13908//mucin-5B	XP_035464810.1//hippocampus abundant transcript 1 protein isoform X1 [Scophthalmus maximus]
SMAX5B_012175	CP026243.1	25862236..25865531	1.07308	-2.56058	-5.89946	0.00577802	0.0987585	1	protein_coding	K05633//NEDD4-like E3 ubiquitin-protein ligase WWP1 [EC:2.3.2.26];K16340//PH domain and leucine-rich repeat-containing protein phosphatase [EC:3.1.3.16]	XP_035499869.1//zymogen granule membrane protein 16-like [Scophthalmus maximus]
SMAX5B_012325	CP026247.1	complement(7812764..7828583)	0.773222	-2.62423	-6.16554	0.00749347	0.115059	1	protein_coding	K03250//translation initiation factor 3 subunit E	AWP01313.1//putative immunoglobulin-like domain-containing receptor 2 [Scophthalmus maximus]
SMAX5B_012413	CP026247.1	complement(13709990..13716035)	2.9827	-2.65633	-6.30427	0.00336659	0.0704428	1	protein_coding	K09877//aquaporin-9	AWP01607.1//putative aquaporin-9-like [Scophthalmus maximus]
SMAX5B_021695	CP026256.1	complement(1607880..1610750)	1.61883	-2.66635	-6.34821	0.00011209	0.00785884	1	protein_coding	K18401//KAT8 regulatory NSL complex subunit 2	AWP12704.1//putative nck-associated protein 5-like [Scophthalmus maximus]
SMAX5B_003838	CP026252.1	complement(294624..297533)	2.57962	-2.67803	-6.3998	0.000873323	0.0304959	1	protein_coding	K08770//ubiquitin C;K02927//large subunit ribosomal protein L40e;K04610//metabotropic glutamate receptor 8	XP_035499042.1//uncharacterized protein LOC118315681 isoform X1 [Scophthalmus maximus]
SMAX5B_005577	CP026248.1	5182766..5191192	0.845397	-2.68182	-6.41663	0.00812316	0.120732	1	protein_coding	K04927//potassium voltage-gated channel KQT-like subfamily member 2	AWP02397.1//putative potassium voltage-gated channel subfamily KQT member 2 [Scophthalmus maximus]
SMAX5B_006312	CP026249.1	complement(6445527..6448979)	2.9727	-2.68894	-6.44841	0.00227151	0.0559565	1	protein_coding	NA	KAF0046803.1//hypothetical protein F2P81_000436 [Scophthalmus maximus]
SMAX5B_016534	CP026251.1	complement(12534491..12549805)	0.5507	-2.72423	-6.60806	0.00590074	0.0996993	1	protein_coding	K02324//DNA polymerase epsilon subunit 1 [EC:2.7.7.7]	XP_008280274.1//DNA polymerase epsilon catalytic subunit A [Stegastes partitus]
SMAX5B_005800	CP026261.1	complement(5690114..5736078)	0.855527	-2.72598	-6.61608	0.000783034	0.0284123	1	protein_coding	K10352//myosin heavy chain	XP_026181169.1//myosin-10 isoform X2 [Mastacembelus armatus]
SMAX5B_000286	CP026259.1	complement(9109178..9120282)	0.475671	-2.76479	-6.79651	0.00513373	0.0927539	1	protein_coding	K09257//NF-kappa-B inhibitor-like protein 2	AWP16422.1//putative tonsoku-like protein-like isoform 2 [Scophthalmus maximus]
SMAX5B_020436	CP026260.1	5892982..5915435	0.406144	-2.9671	-7.81965	0.00770947	#N/A	1	protein_coding	K22526//myocardin	AWP17231.1//putative myocardin [Scophthalmus maximus]
SMAX5B_014777	CP026253.1	19370700..19390103	1.92006	-2.96732	-7.82083	0.00647981	0.104433	1	protein_coding	K09270//transcription factor SOX7/8/10/18 (SOX group E/F)	AWP10035.1//putative transcription factor Sox-18B-like [Scophthalmus maximus]
SMAX5B_010082	CP026252.1	14953707..14962852	1.69327	-3.01583	-8.08825	5.51817e-05	0.00462458	0.953594	protein_coding	NA	AWP08578.1//putative telomere repeats-binding bouquet formation protein 1 [Scophthalmus maximus]
SMAX5B_012415	CP026247.1	10067439..10070093	5.92711	-3.03668	-8.20603	0.00618699	0.102511	1	protein_coding	K07845//Ras-related associated with diabetes	AWP01437.1//putative GTP-binding protein RAD [Scophthalmus maximus]
SMAX5B_008861	CP026255.1	13745638..13749245	75.0755	-3.06655	-8.37766	3.14551e-10	2.72401e-07	5.43576e-06	protein_coding	K09203//early growth response protein 1	XP_022607739.1//early growth response protein 1 [Seriola dumerili]
SMAX5B_014654	CP026253.1	complement(10226989..10238048)	0.845759	-3.11529	-8.66556	0.00788547	0.119246	1	protein_coding	K19529//synaptonemal complex protein 2	AWP09495.1//putative synaptonemal complex protein 2 [Scophthalmus maximus]
SMAX5B_019473	CP026244.1	7169169..7302957	0.360417	-3.20357	-9.21238	0.00146629	0.0432887	1	protein_coding	K05641//ATP-binding cassette, subfamily A (ABC1), member 1	AWO97646.1//putative ATP-binding cassette sub-family A member 1-like [Scophthalmus maximus]
SMAX5B_006697	CP026261.1	6031041..6034771	3.16917	-3.33711	-10.1058	9.23467e-07	0.000199931	0.0159584	protein_coding	K19926//zona pellucida sperm-binding protein 1	AWP18550.1//putative zona pellucida sperm-binding protein 4-like [Scophthalmus maximus]
SMAX5B_010354	CP026251.1	complement(15780135..15782657)	149.199	-3.51574	-11.4378	1.86282e-26	1.2099e-22	3.21914e-22	protein_coding	NA	XP_035496131.1//adenine nucleotide translocase lysine N-methyltransferase [Scophthalmus maximus]
SMAX5B_002781	CP026248.1	3519789..3541714	1.11714	-3.53595	-11.5991	9.36421e-06	0.00120423	0.161823	protein_coding	K19949//otoferlin	AWP02330.1//putative fer-1-like protein 4-like [Scophthalmus maximus]
SMAX5B_020856	CP026261.1	14283969..14287830	1.10525	-3.62382	-12.3276	0.0055726	0.0965585	1	protein_coding	K13153//U11/U12 small nuclear ribonucleoprotein 25 kDa protein	AWP19143.1//putative U11/U12 small nuclear ribonucleoprotein 25 kDa protein [Scophthalmus maximus]
SMAX5B_009382	CP026255.1	complement(9876063..9878455)	4.34607	-3.71284	-13.1123	3.44608e-06	0.000556813	0.0595516	protein_coding	K09030//fos-like antigen 2	XP_035504969.1//fos-related antigen 1a [Scophthalmus maximus]
SMAX5B_015677	CP026264.1	8182501..8188259	2.35152	-3.75377	-13.4896	0.00266338	0.0615667	1	protein_coding	K00364//GMP reductase [EC:1.7.1.7]	XP_005434965.1//GMP reductase 1 isoform X1 [Falco cherrug]
SMAX5B_015921	CP026264.1	3784578..3794962	3.0371	-3.79398	-13.8708	0.00435894	0.083688	1	protein_coding	K19894//sperm acrosome membrane-associated protein 4	XP_035476780.1//sperm acrosome membrane-associated protein 4 [Scophthalmus maximus]
SMAX5B_021313	CP026249.1	complement(26689651..26705696)	0.765624	-3.8776	-14.6985	0.00667691	0.106946	1	protein_coding	K22654//immunoglobulin superfamily DCC subclass member 3	XP_023281224.1//immunoglobulin superfamily DCC subclass member 3-like [Seriola lalandi dorsalis]
SMAX5B_003720	CP026243.1	15493145..15495749	913.956	-3.9104	-15.0365	8.55602e-28	1.11143e-23	1.47857e-23	protein_coding	K23106//hepcidin	CAJ34592.1//hepcidin 1 precursor [Scophthalmus maximus]
SMAX5B_011139	CP026261.1	complement(16806159..16826103)	0.974742	-4.12236	-17.4163	0.0012022	0.0378471	1	protein_coding	K04909//potassium voltage-gated channel Eag-related subfamily H member 6	AWP19297.1//putative potassium voltage-gated channel subfamily H member 6 [Scophthalmus maximus]
SMAX5B_022713	CP026243.1	8250024..8287949	0.355331	-4.24799	-19.0009	0.00036333	0.0173517	1	protein_coding	K08809//striated muscle-specific serine/threonine protein kinase [EC:2.7.11.1]	AWO95916.1//Pkinase multi-domain protein [Scophthalmus maximus]
SMAX5B_009257	CP026254.1	352311..381383	0.409488	-4.46907	-22.1475	0.00100977	0.0338886	1	protein_coding	K23380//FRAS1-related extracelluar matrix protein 1/2	XP_034438389.1//FRAS1-related extracellular matrix protein 1-like isoform X1 [Hippoglossus hippoglossus]
SMAX5B_017375	CP026260.1	complement(16522893..16545318)	2.32829	-4.54002	-23.2638	5.36454e-08	1.88339e-05	0.000927046	protein_coding	K21112//synaptopodin	XP_035469347.1//synaptopodin 2-like protein [Scophthalmus maximus]
SMAX5B_017556	CP026243.1	6020893..6063607	3.16239	-5.02775	-32.6215	5.63224e-08	1.88505e-05	0.000973307	protein_coding	K18273//alpha-tectorin	AWO95813.1//putative zonadhesin-like isoform 2 [Scophthalmus maximus]
SMAX5B_022573	CP026254.1	complement(8429376..8436345)	1.99976	-6.07879	-67.5922	0.00738267	0.113948	1	protein_coding	K20054//disabled homolog 1;K12475//disabled homolog 2	AWP10789.1//putative disabled -like 2-like [Scophthalmus maximus]

## Sheet: R_Inf vs S_Inf Liver
Name	Chromosome	Region	Max group mean	Log₂ fold change	Fold change	P-value	FDR p-value	Bonferroni	Biotype	Kegg Orthology	Nr Description
SMAX5B_021737	CP026249.1	17919728..17982713	1.27998	4.7545	26.9927	4.73099e-06	0.000913986	0.0817563	protein_coding	K08647//pappalysin-2 [EC:3.4.24.-]	AWP04620.1//putative pappalysin-2 [Scophthalmus maximus]
SMAX5B_015029	CP026253.1	complement(12036052..12039464)	3.27313	4.6909	25.8286	0.00275713	0.0935927	1	protein_coding	K12337//inositol 1,4,5-triphosphate receptor-associated cGMP kinase substrate	AWP09609.1//putative protein MRVI1-like [Scophthalmus maximus]
SMAX5B_021967	CP026259.1	5166613..5173719	5.49613	4.28468	19.4902	1.21531e-05	0.00197105	0.210017	protein_coding	K17275//plastin-1	XP_035465956.1//plastin-1 [Scophthalmus maximus]
SMAX5B_013103	CP026247.1	19968829..19973519	36.7665	3.31398	9.94507	2.12896e-22	9.32271e-19	3.67905e-18	protein_coding	K00078//dihydrodiol dehydrogenase / D-xylose 1-dehydrogenase (NADP) [EC:1.3.1.20 1.1.1.179]	XP_028436856.1//trans-1,2-dihydrobenzene-1,2-diol dehydrogenase-like isoform X1 [Perca flavescens]
SMAX5B_020675	CP026262.1	complement(4001407..4002482)	36.8479	3.19887	9.18241	4.66963e-05	0.00533434	0.806959	protein_coding	NA	AWP19656.1//putative sentrin-specific protease 2-like, partial [Scophthalmus maximus]
SMAX5B_009660	CP026254.1	24160115..24165035	3.937	3.02274	8.12707	0.0012821	0.0574846	1	protein_coding	K03260//translation initiation factor 4G;K23612//neural Wiskott-Aldrich syndrome protein	AWP11537.1//Hypothetical protein SMAX5B_009660 [Scophthalmus maximus]
SMAX5B_005298	CP026258.1	20745358..20749391	121.119	2.97595	7.86776	4.24943e-12	6.20275e-09	7.34344e-08	protein_coding	K15310//tumor protein p53-inducible nuclear protein 1	AWP15832.1//putative tumor protein p53-inducible nuclear protein 1 [Scophthalmus maximus]
SMAX5B_017746	CP026257.1	19653637..19683151	2.77503	2.96833	7.82631	0.000835908	0.0411286	1	protein_coding	K12232//E3 ubiquitin-protein ligase HECTD2 [EC:2.3.2.26]	XP_026165540.1//probable E3 ubiquitin-protein ligase HECTD2 [Mastacembelus armatus]
SMAX5B_021582	CP026250.1	complement(938237..943336)	1.93001	2.86218	7.27115	0.00118235	0.0545001	1	protein_coding	K06083//WAS protein family, member 3;K05748//WAS protein family, member 2	XP_018530187.1//wiskott-Aldrich syndrome protein family member 3-like [Lates calcarifer]
SMAX5B_015663	CP026264.1	complement(5466480..5468873)	1.5246	2.84289	7.17453	0.00927916	0.189615	1	protein_coding	K10739//replication factor A2;K21125//mucin-5AC	AWP21463.1//XK-related protein [Scophthalmus maximus]
SMAX5B_021989	CP026259.1	complement(6179353..6190847)	1.82019	2.63277	6.20217	0.000830149	0.0410482	1	protein_coding	K19511//peroxidase [EC:1.11.1.7]	XP_035465517.1//SLIT and NTRK-like protein 3 [Scophthalmus maximus]
SMAX5B_013977	CP026258.1	complement(11648104..11655038)	1.13255	2.58723	6.00945	0.00591536	0.148019	1	protein_coding	K05081//prolactin receptor	AWP15398.1//putative prolactin receptor [Scophthalmus maximus]
SMAX5B_006554	CP026249.1	complement(11405991..11407154)	52.9759	2.57126	5.94329	5.38943e-08	2.36003e-05	0.000931347	protein_coding	NA	XP_014898110.1//calcium/calmodulin-dependent protein kinase II inhibitor 2 [Poecilia latipinna]
SMAX5B_017367	CP026260.1	15038063..15039832	66.5129	2.55866	5.8916	1.08828e-10	1.1914e-07	1.88066e-06	protein_coding	K08270//DNA-damage-inducible transcript 4	XP_035467799.1//DNA damage-inducible transcript 4 protein [Scophthalmus maximus]
SMAX5B_000828	CP026249.1	19146731..19151313	1.10173	2.54796	5.84808	0.00754407	0.168548	1	protein_coding	K23573//dentin sialophosphoprotein	AWP04643.1//Hypothetical protein SMAX5B_000828 [Scophthalmus maximus]
SMAX5B_010293	CP026251.1	complement(19159536..19167053)	2.56619	2.48692	5.6058	0.000121695	0.0111021	1	protein_coding	K00509//prostaglandin-endoperoxide synthase 1 [EC:1.14.99.1]	XP_019954609.1//prostaglandin G/H synthase 1-like [Paralichthys olivaceus]
SMAX5B_019033	CP026255.1	complement(16414519..16475540)	1.65161	2.47571	5.56242	0.00017289	0.0145593	1	protein_coding	K09103//early B-cell factor	AWP12366.1//putative transcription factor COE1-like isoform 2 [Scophthalmus maximus]
SMAX5B_003356	CP026249.1	1735113..1793013	13.1839	2.47277	5.55107	5.9703e-10	5.22878e-07	1.03173e-05	protein_coding	K06724//neuropilin 1	AWP03623.1//putative neuropilin-1a-like, partial [Scophthalmus maximus]
SMAX5B_018082	CP026257.1	complement(4843202..4845421)	69.5976	2.35051	5.10006	4.02147e-12	6.20275e-09	6.9495e-08	protein_coding	K04573//neurofilament medium polypeptide (neurofilament 3)	AWP13911.1//putative neurofilament light polypeptide-like [Scophthalmus maximus]
SMAX5B_016657	CP026243.1	complement(4486395..4500089)	5.48686	2.27943	4.85486	2.89884e-07	9.76463e-05	0.00500949	protein_coding	K05871//focal adhesion kinase 2 [EC:2.7.10.2]	AWO95711.1//putative protein-tyrosine kinase 2-beta-like [Scophthalmus maximus]
SMAX5B_000349	CP026259.1	12144144..12145597	40.7712	2.27742	4.84811	1.18071e-06	0.000330022	0.0204039	protein_coding	K07232//glutathione-specific gamma-glutamylcyclotransferase [EC:4.3.2.7]	XP_035465859.1//glutathione-specific gamma-glutamylcyclotransferase 1-like [Scophthalmus maximus]
SMAX5B_012877	CP026246.1	27840928..27856830	7.9682	2.24895	4.75335	4.9211e-06	0.000936934	0.0850415	protein_coding	K09501//serpin peptidase inhibitor, clade H, member 1	AWP00859.1//putative serpin H1-like [Scophthalmus maximus]
SMAX5B_007169	CP026249.1	1794645..1805329	19.5182	2.2231	4.66896	1.23505e-09	9.54404e-07	2.13429e-05	protein_coding	K06724//neuropilin 1	AWP03624.1//putative neuropilin-1a-like, partial [Scophthalmus maximus]
SMAX5B_008705	CP026257.1	complement(13418794..13447392)	6.82906	2.21144	4.63139	2.01305e-10	2.03427e-07	3.47876e-06	protein_coding	K23573//dentin sialophosphoprotein;K13172//serine/arginine repetitive matrix protein 2;K14317//nuclear pore complex protein Nup214	AWP14382.1//putative protein very KIND [Scophthalmus maximus]
SMAX5B_006510	CP026249.1	complement(7981114..7999426)	2.77456	2.18781	4.55613	0.00119697	0.0545992	1	protein_coding	K10366//dystrophin	XP_035490762.1//dystrobrevin alpha isoform X7 [Scophthalmus maximus]
SMAX5B_011007	CP026251.1	complement(6013015..6026421)	9.03168	2.17785	4.52477	2.78128e-09	1.73989e-06	4.80633e-05	protein_coding	K21357//serine/threonine-protein kinase ULK1 [EC:2.7.11.1]	AWP06703.1//putative serine/threonine-protein kinase ULK1-like [Scophthalmus maximus]
SMAX5B_010945	CP026251.1	8978825..9088916	1.83967	2.1398	4.40701	7.76287e-06	0.00137036	0.13415	protein_coding	K09228//KRAB domain-containing zinc finger protein;K04978//transient receptor potential cation channel subfamily M member 3	AWP06873.1//putative transient receptor potential cation channel subfamily M member 3-like [Scophthalmus maximus]
SMAX5B_002678	CP026253.1	4299846..4301390	11.4718	2.11757	4.33963	5.60043e-08	2.37332e-05	0.00096781	protein_coding	K09210//krueppel-like factor 15	AWP09244.1//putative Krueppel-like factor 15 [Scophthalmus maximus]
SMAX5B_007362	CP026250.1	complement(17274373..17291055)	2.38553	2.07127	4.20257	0.00523662	0.13686	1	protein_coding	K13024//inositol-hexakisphosphate/diphosphoinositol-pentakisphosphate 1-kinase [EC:2.7.4.24];K19363//lipopolysaccharide-induced tumor necrosis factor-alpha factor;K04619//G protein-coupled receptor family C group 5 member B;K23573//dentin sialophosphoprotein	AWP06055.1//putative G-protein coupled receptor family C group 5 member B-like [Scophthalmus maximus]
SMAX5B_005851	CP026249.1	9470509..9551916	1.29473	2.05751	4.16267	0.00347195	0.10732	1	protein_coding	K23013//dipeptidyl aminopeptidase-like protein 6	AWP04041.1//putative dipeptidyl aminopeptidase-like protein 6 isoform 2 [Scophthalmus maximus]
SMAX5B_020440	CP026260.1	complement(9349824..9413061)	3.41306	2.05567	4.15737	0.000401734	0.0250122	1	protein_coding	K21958//extracellular serine/threonine protein kinase FAM20C [EC:2.7.11.1]	AWP17420.1//putative extracellular serine/threonine protein kinase FAM20C-like [Scophthalmus maximus]
SMAX5B_019080	CP026255.1	5240018..5245176	5.47536	2.02581	4.07222	0.00041446	0.0255623	1	protein_coding	K10327//ankyrin repeat and SOCS box protein 5	XP_035506513.1//ankyrin repeat and SOCS box protein 5 isoform X1 [Scophthalmus maximus]
SMAX5B_005912	CP026249.1	9928316..9945470	1.21653	1.98868	3.96874	0.000483852	0.0287618	1	protein_coding	K10392//kinesin family member 1	AWP04093.1//putative kinesin-like protein KIF1A isoform 2 [Scophthalmus maximus]
SMAX5B_005501	CP026244.1	complement(12581768..12612890)	0.743944	1.96084	3.89287	0.00678723	0.159208	1	protein_coding	K12337//inositol 1,4,5-triphosphate receptor-associated cGMP kinase substrate;K22595//protein KASH5;K23573//dentin sialophosphoprotein	AWO97903.1//putative lymphoid-restricted membrane protein [Scophthalmus maximus]
SMAX5B_003485	CP026259.1	14072003..14105629	5.79908	1.95902	3.88798	8.96725e-06	0.00155004	0.154963	protein_coding	K06070//protein kinase D [EC:2.7.11.13]	AWP16724.1//Serine/threonine-protein kinase D [Scophthalmus maximus]
SMAX5B_002325	CP026248.1	12718773..12720390	5.75061	1.95372	3.87372	0.000340398	0.0227432	1	protein_coding	K04701//cytokine inducible SH2-containing protein	XP_035487108.1//cytokine-inducible SH2-containing protein-like [Scophthalmus maximus]
SMAX5B_002527	CP026243.1	13568093..13577369	9.55875	1.92656	3.80146	0.000299251	0.0212501	1	protein_coding	NA	AWO96146.1//Hypothetical protein SMAX5B_002527 [Scophthalmus maximus]
SMAX5B_002139	CP026243.1	66098..67463	176.544	1.88695	3.69851	4.15669e-05	0.00496	0.718318	protein_coding	K10655//tripartite motif-containing protein 63 [EC:2.3.2.27]	XP_035480408.1//E3 ubiquitin-protein ligase TRIM63a [Scophthalmus maximus]
SMAX5B_020461	CP026254.1	complement(2698991..2722518)	7.34559	1.88325	3.68906	0.00691456	0.160773	1	protein_coding	K16449//regulator of G-protein signaling	AWP10539.1//putative regulator of G-protein signaling 8 isoform 2 [Scophthalmus maximus]
SMAX5B_018835	CP026252.1	755752..759660	190.423	1.87524	3.66861	2.40463e-11	3.15896e-08	4.15544e-07	protein_coding	K17558//protein phosphatase 1 regulatory subunit 15B	AWP07830.1//putative lisH domain-containing protein C1711.05-like [Scophthalmus maximus]
SMAX5B_006668	CP026261.1	4981021..4989788	3.81738	1.86481	3.64219	0.00093556	0.04502	1	protein_coding	K05843//transforming growth factor, beta receptor III	AWP18474.1//putative transforming growth factor beta receptor type 3-like [Scophthalmus maximus]
SMAX5B_010106	CP026252.1	complement(10851826..10870733)	3.52026	1.84217	3.5855	0.000140455	0.0121392	1	protein_coding	K19498//anoctamin-3	XP_035498263.1//anoctamin-3 isoform X3 [Scophthalmus maximus]
SMAX5B_009231	CP026254.1	complement(1675418..1677072)	104.212	1.82897	3.55284	0.00144681	0.0621134	1	protein_coding	K23578//insulin-like growth factor-binding protein 1	XP_035502540.1//insulin-like growth factor-binding protein 1 [Scophthalmus maximus]
SMAX5B_013017	CP026261.1	complement(263087..284146)	77.0374	1.81076	3.50827	5.68073e-07	0.000177685	0.00981686	protein_coding	K00898//pyruvate dehydrogenase kinase 2/3/4 [EC:2.7.11.2]	XP_028455130.1//pyruvate dehydrogenase (acetyl-transferring) kinase isozyme 2, mitochondrial-like [Perca flavescens]
SMAX5B_020195	CP026260.1	complement(10517883..10519726)	9.5236	1.74495	3.35184	0.00324296	0.102657	1	protein_coding	K06255//basement membrane-specific heparan sulfate proteoglycan core protein;K06727//Fc receptor-like protein	AWP17506.1//Hypothetical protein SMAX5B_020195 [Scophthalmus maximus]
SMAX5B_004011	CP026246.1	14070115..14075587	2.463	1.71236	3.27696	0.00043797	0.0265143	1	protein_coding	K07970//beta-1,3-N-acetylglucosaminyltransferase 3 [EC:2.4.1.146 2.4.1.149]	XP_005454036.2//N-acetyllactosaminide beta-1,3-N-acetylglucosaminyltransferase 3 isoform X1 [Oreochromis niloticus]
SMAX5B_007866	CP026254.1	complement(21203249..21212569)	13.6786	1.71224	3.2767	1.10902e-06	0.000316723	0.0191651	protein_coding	K02561//Bcl-2-related ovarian killer protein	XP_035504414.1//bcl-2-related ovarian killer protein homolog A [Scophthalmus maximus]
SMAX5B_020834	CP026261.1	13446996..13459598	3.52967	1.69943	3.24772	0.000778323	0.0399705	1	protein_coding	K08446//CD97 antigen	AWP19066.1//putative EGF-like module-containing mucin-like hormone receptor-like 1 [Scophthalmus maximus]
SMAX5B_014414	CP026257.1	complement(534343..595711)	6.96519	1.69163	3.23022	9.32681e-05	0.00913071	1	protein_coding	K10380//ankyrin	XP_035461269.1//ankyrin-3 isoform X30 [Scophthalmus maximus]
SMAX5B_010012	CP026252.1	11269686..11277461	2.31367	1.69055	3.22781	0.00855753	0.181323	1	protein_coding	K10226//acyl-CoA 6-desaturase (Delta-6 desaturase) [EC:1.14.19.3]	XP_018537439.1//fatty acid desaturase 2 [Lates calcarifer]
SMAX5B_001490	CP026244.1	5345633..5354738	68.2242	1.68209	3.20892	1.7299e-07	6.68404e-05	0.00298945	protein_coding	K21944//period circadian protein 1	XP_035477356.1//period circadian protein homolog 1b isoform X1 [Scophthalmus maximus]
SMAX5B_005176	CP026248.1	complement(7501059..7512388)	10.4848	1.67471	3.19255	0.00374274	0.113553	1	protein_coding	K01425//glutaminase [EC:3.5.1.2]	XP_030274432.1//glutaminase kidney isoform, mitochondrial-like [Sparus aurata]
SMAX5B_016702	CP026260.1	4642191..4654255	30.3178	1.65011	3.13856	5.44591e-09	3.25195e-06	9.41108e-05	protein_coding	K07375//tubulin beta;K18406//tudor domain-containing protein 2	AWP17200.1//putative tudor and KH domain-containing protein isoform 4 [Scophthalmus maximus]
SMAX5B_008200	CP026262.1	8712981..8723432	22.2704	1.64842	3.13491	2.17365e-05	0.00300581	0.375628	protein_coding	K08869//aarF domain-containing kinase	XP_035473826.1//atypical kinase COQ8A, mitochondrial [Scophthalmus maximus]
SMAX5B_002395	CP026248.1	13850067..13861261	28.4343	1.64366	3.12458	1.88766e-07	7.08521e-05	0.00326207	protein_coding	K19030//6-phosphofructo-2-kinase / fructose-2,6-biphosphatase 4 [EC:2.7.1.105 3.1.3.46]	XP_022601269.1//6-phosphofructo-2-kinase/fructose-2,6-bisphosphatase 4-like isoform X3 [Seriola dumerili]
SMAX5B_009774	CP026252.1	complement(11688612..11693854)	2.6998	1.63418	3.10411	0.00170807	0.0679969	1	protein_coding	K11579//protein zwilch	AWP08381.1//putative protein zwilch -like [Scophthalmus maximus]
SMAX5B_005747	CP026261.1	6356278..6366801	2.4749	1.62436	3.08305	0.00163274	0.0661466	1	protein_coding	K17497//phosphomannomutase [EC:5.4.2.8]	XP_035470834.1//phosphomannomutase 1 [Scophthalmus maximus]
SMAX5B_008117	CP026262.1	8427904..8430897	7.88341	1.61829	3.07011	0.00019135	0.0155739	1	protein_coding	K07866//Ras homolog gene family, member V	XP_035474198.1//rho-related GTP-binding protein RhoV [Scophthalmus maximus]
SMAX5B_007382	CP026250.1	13123856..13128587	62.4595	1.61751	3.06845	0.00148441	0.0626425	1	protein_coding	K00510//heme oxygenase 1 [EC:1.14.14.18]	AWP05784.1//Heme oxygenase 1 [Scophthalmus maximus]
SMAX5B_003206	CP026247.1	complement(26444675..26482574)	3.03426	1.60347	3.03874	0.000940817	0.0451077	1	protein_coding	K10955//mucin-2;K21125//mucin-5AC	AWP02052.1//putative mucin-5AC-like [Scophthalmus maximus]
SMAX5B_016443	CP026248.1	complement(37801..42176)	366.047	1.602	3.03564	0.00226683	0.0818115	1	protein_coding	K01596//phosphoenolpyruvate carboxykinase (GTP) [EC:4.1.1.32]	AWP02172.1//Cytosolic phosphoenolpyruvate carboxykinase [Scophthalmus maximus]
SMAX5B_013186	CP026247.1	17683724..17688596	269.116	1.56698	2.96283	1.03401e-05	0.00174151	0.178687	protein_coding	K05071//interleukin 4 receptor	AWP01794.1//Hypothetical protein SMAX5B_013186 [Scophthalmus maximus]
SMAX5B_003415	CP026259.1	complement(14054302..14061748)	825.953	1.56065	2.94988	5.22131e-07	0.000167298	0.00902295	protein_coding	K00683//glutaminyl-peptide cyclotransferase [EC:2.3.2.5]	AWP16720.1//putative glutaminyl-peptide cyclotransferase [Scophthalmus maximus]
SMAX5B_004416	CP026244.1	928862..934068	17.1054	1.54416	2.91633	1.3271e-05	0.00210049	0.229335	protein_coding	K03334//L-amino-acid oxidase [EC:1.4.3.2]	AWO97275.1//skin mucus antibacterial l-amino acid oxidase-like [Scophthalmus maximus]
SMAX5B_002836	CP026262.1	complement(10599373..10601736)	41.0022	1.5424	2.91279	0.00309157	0.101044	1	protein_coding	K04379//proto-oncogene protein c-fos	AWP19982.1//Proto-oncogene protein c-Fos [Scophthalmus maximus]
SMAX5B_006856	CP026246.1	27031938..27032276	55.4384	1.53991	2.90775	0.00327918	0.1032	1	protein_coding	K00710//polypeptide N-acetylgalactosaminyltransferase [EC:2.4.1.41]	AWP00826.1//Polypeptide N-acetylgalactosaminyltransferase [Scophthalmus maximus]
SMAX5B_019525	CP026253.1	23400770..23463217	1.08705	1.5368	2.90151	0.00813255	0.175719	1	protein_coding	K06825//fibrillin 1	AWP10290.1//putative signal peptide CUB and EGF-like domain-containing protein 3, partial [Scophthalmus maximus]
SMAX5B_006619	CP026249.1	5417231..5459765	39.4802	1.53484	2.89757	1.62925e-06	0.000411605	0.0281551	protein_coding	K04527//insulin receptor [EC:2.7.10.1]	AWP03805.1//putative insulin receptor [Scophthalmus maximus]
SMAX5B_007184	CP026249.1	2500868..2549218	3.17684	1.52913	2.88613	0.00417245	0.121001	1	protein_coding	K10747//DNA ligase 1 [EC:6.5.1.1 6.5.1.6 6.5.1.7]	XP_035489095.2//DNA ligase 1 [Scophthalmus maximus]
SMAX5B_012477	CP026247.1	complement(8030208..8048356)	38.5226	1.52508	2.87803	1.7765e-08	9.72412e-06	0.000306997	protein_coding	K07190//phosphorylase kinase alpha/beta subunit	XP_022605178.1//phosphorylase b kinase regulatory subunit alpha, liver isoform isoform X3 [Seriola dumerili]
SMAX5B_002729	CP026253.1	7778614..7802546	7.91616	1.4955	2.81961	0.00498025	0.13325	1	protein_coding	K10876//RAD54-like protein 2 [EC:3.6.4.12]	AWP09365.1//putative helicase ARIP4-like [Scophthalmus maximus]
SMAX5B_001378	CP026261.1	complement(1253699..1265228)	10.6851	1.48758	2.80418	0.000201434	0.0159412	1	protein_coding	K23040//methyltransferase-like protein 22 [EC:2.1.1.-]	AWP18305.1//putative methyltransferase-like protein 22 isoform 4 [Scophthalmus maximus]
SMAX5B_010845	CP026251.1	complement(8852092..8859204)	6.21721	1.4731	2.77617	0.00943811	0.190751	1	protein_coding	K15113//solute carrier family 25 (mitochondrial iron transporter), member 28/37	XP_035496183.1//mitoferrin-1 [Scophthalmus maximus]
SMAX5B_022736	CP026247.1	complement(23547015..23565480)	5.05169	1.46941	2.76909	0.00082307	0.0410482	1	protein_coding	K16543//centrosomal protein CEP89	AWP01988.1//putative centrosomal protein of 89 kDa [Scophthalmus maximus]
SMAX5B_016693	CP026260.1	complement(4318494..4366288)	42.0293	1.46515	2.76092	0.000302251	0.0213477	1	protein_coding	K19985//exocyst complex component 6	XP_019938988.1//exocyst complex component 6 isoform X2 [Paralichthys olivaceus]
SMAX5B_017342	CP026260.1	complement(14220480..14228061)	46.6561	1.43368	2.70136	2.62793e-08	1.32781e-05	0.000454133	protein_coding	K00907//myosin-light-chain kinase [EC:2.7.11.18]	XP_023264881.1//myosin light chain kinase, smooth muscle-like [Seriola lalandi dorsalis]
SMAX5B_005097	CP026252.1	complement(6718328..6719106)	100.01	1.42827	2.69124	9.3328e-06	0.00159227	0.16128	protein_coding	K09993//cyclin-dependent kinase inhibitor 1C	XP_035499537.1//cyclin-dependent kinase inhibitor 1C-like [Scophthalmus maximus]
SMAX5B_001947	CP026263.1	complement(2739419..2748825)	10.7529	1.42719	2.68923	3.06734e-06	0.000649931	0.0530068	protein_coding	K05092//fms-related tyrosine kinase 3 [EC:2.7.10.1]	AWP20663.1//putative receptor-type tyrosine-protein kinase FLT3 [Scophthalmus maximus]
SMAX5B_012415	CP026247.1	10067439..10070093	8.4801	1.42441	2.68404	0.00419058	0.121259	1	protein_coding	K07845//Ras-related associated with diabetes	AWP01437.1//putative GTP-binding protein RAD [Scophthalmus maximus]
SMAX5B_022745	CP026247.1	complement(23568687..23595316)	47.4281	1.41651	2.6694	1.80356e-06	0.000438767	0.0311674	protein_coding	K18040//tyrosine-protein phosphatase non-receptor type 23 [EC:3.1.3.48]	XP_018552999.1// rhophilin-2 isoform X1 [Lates calcarifer]
SMAX5B_002357	CP026248.1	complement(13858870..13863773)	35.3398	1.41457	2.6658	2.5423e-07	9.02654e-05	0.00439335	protein_coding	K05755//actin related protein 2/3 complex, subunit 4	AWP02904.1//Actin-related protein 2/3 complex subunit 4 isoform 2 [Scophthalmus maximus]
SMAX5B_011552	CP026250.1	complement(10121548..10125615)	6.80405	1.41212	2.66129	0.0017352	0.0686372	1	protein_coding	K21125//mucin-5AC	AWP05582.1//DUF4585 domain containing protein [Scophthalmus maximus]
SMAX5B_013971	CP026258.1	15046984..15056010	3.57022	1.37211	2.58849	0.00737124	0.166099	1	protein_coding	K22630//interleukin 31 receptor subunit alpha	AWP15568.1//putative interleukin-31 receptor subunit alpha-like [Scophthalmus maximus]
SMAX5B_020953	CP026261.1	complement(12859127..12869275)	32.7202	1.37037	2.58536	2.03302e-06	0.000468558	0.0351326	protein_coding	K07809//[heparan sulfate]-glucosamine 3-sulfotransferase 3 [EC:2.8.2.30]	XP_035471190.1//heparan sulfate glucosamine 3-O-sulfotransferase 3B1a [Scophthalmus maximus]
SMAX5B_007749	CP026244.1	complement(17534286..17537596)	22.8019	1.36427	2.57445	3.21824e-06	0.000671079	0.0556144	protein_coding	K09228//KRAB domain-containing zinc finger protein	XP_022605373.1//zinc finger protein interacting with ribonucleoprotein K-like [Seriola dumerili]
SMAX5B_020484	CP026254.1	3326541..3328118	12.0385	1.358	2.5633	0.00987698	0.196774	1	protein_coding	K16449//regulator of G-protein signaling	AWP10548.1//Regulator of G-protein signaling 1 [Scophthalmus maximus]
SMAX5B_017512	CP026244.1	23612273..23626305	2.20848	1.34997	2.54907	0.00184224	0.0711807	1	protein_coding	K18035//receptor-type tyrosine-protein phosphatase O [EC:3.1.3.48]	AWO98379.1//putative receptor-type tyrosine-protein phosphatase O [Scophthalmus maximus]
SMAX5B_014401	CP026257.1	721672..737179	3.32693	1.34768	2.54502	0.00593314	0.148182	1	protein_coding	K19001//ATP-dependent DNA helicase	XP_035462499.1//lymphoid-specific helicase isoform X1 [Scophthalmus maximus]
SMAX5B_016516	CP026255.1	754022..771169	57.0619	1.33243	2.51826	0.0048314	0.131136	1	protein_coding	K21125//mucin-5AC	AWP11609.1//SPARC isoform 2 [Scophthalmus maximus]
SMAX5B_004762	CP026256.1	complement(20660683..20668346)	28.8189	1.32769	2.51	7.82346e-06	0.00137036	0.135197	protein_coding	K17276//plastin-2	AWP13597.1//putative plastin-2 [Scophthalmus maximus]
SMAX5B_016882	CP026257.1	9926691..9928657	40.846	1.32339	2.50253	0.000222091	0.0170078	1	protein_coding	K02990//small subunit ribosomal protein S6	XP_035462092.1//28S ribosomal protein S6, mitochondrial [Scophthalmus maximus]
SMAX5B_009387	CP026255.1	complement(8187104..8239811)	15.5225	1.31519	2.48835	1.64204e-05	0.0024513	0.28376	protein_coding	K16499//protocadherin delta 2	AWP11828.1//putative protocadherin-19 [Scophthalmus maximus]
SMAX5B_009419	CP026255.1	10444938..10449341	12.764	1.29943	2.46132	0.000421531	0.0258769	1	protein_coding	K22154//dapper	AWP11996.1//Dapper domain containing protein [Scophthalmus maximus]
SMAX5B_019946	CP026245.1	4630329..4645753	245.918	1.2831	2.43362	0.000228154	0.0172256	1	protein_coding	K08268//hypoxia-inducible factor 1 alpha	XP_035479602.1//hypoxia inducible factor 1 subunit alpha, like isoform X2 [Scophthalmus maximus]
SMAX5B_009981	CP026252.1	complement(12046472..12060405)	34.8762	1.26599	2.40493	4.93553e-05	0.00554171	0.852908	protein_coding	K08803//death-associated protein kinase [EC:2.7.11.1]	XP_023278353.1//death-associated protein kinase 2 isoform X2 [Seriola lalandi dorsalis]
SMAX5B_006480	CP026261.1	complement(3227098..3241439)	3.13118	1.26265	2.39936	0.00276856	0.0937387	1	protein_coding	K09228//KRAB domain-containing zinc finger protein	AWP18382.1//putative all-trans-retinol 13-14-reductase [Scophthalmus maximus]
SMAX5B_001472	CP026244.1	complement(5317634..5331068)	14.3338	1.25044	2.37914	0.00175867	0.0687608	1	protein_coding	K05156//tumor necrosis factor receptor superfamily member 19-like	AWO97566.1//putative RELT-like protein 1 [Scophthalmus maximus]
SMAX5B_015339	CP026255.1	complement(21087173..21099129)	98.6248	1.24946	2.37752	0.00745701	0.166887	1	protein_coding	K18764//nocturnin [EC:3.1.13.4]	AWP12557.1//putative nocturnin [Scophthalmus maximus]
SMAX5B_018068	CP026257.1	6193228..6201965	617.608	1.23815	2.35896	0.000153123	0.0130622	1	protein_coding	K00789//S-adenosylmethionine synthetase [EC:2.5.1.6]	XP_035461085.1//S-adenosylmethionine synthase isoform X1 [Scophthalmus maximus]
SMAX5B_019041	CP026255.1	complement(17353421..17358625)	25.0644	1.23713	2.35729	0.00295277	0.0982038	1	protein_coding	K18645//eukaryotic translation initiation factor 4E binding protein 3	XP_035505856.1//eukaryotic translation initiation factor 4E-binding protein 3-like [Scophthalmus maximus]
SMAX5B_021230	CP026247.1	28716294..28735585	3.49286	1.23614	2.35567	0.00195329	0.0737967	1	protein_coding	K10380//ankyrin;K14686//solute carrier family 31 (copper transporter), member 1;K03511//DNA polymerase kappa [EC:2.7.7.7]	AWP02123.1//putative ankyrin repeat and death domain-containing protein 1A [Scophthalmus maximus]
SMAX5B_001899	CP026263.1	complement(11783344..11853223)	4.50421	1.23334	2.35111	4.19091e-05	0.00496	0.724232	protein_coding	K05769//Rho guanine nucleotide exchange factor 4/29	AWP20998.1//putative rho guanine nucleotide exchange factor 4 [Scophthalmus maximus]
SMAX5B_010840	CP026251.1	7147412..7148762	6.95402	1.21616	2.32327	0.00638377	0.154161	1	protein_coding	K04174//apelin receptor	XP_035496790.1//apelin receptor A [Scophthalmus maximus]
SMAX5B_020954	CP026261.1	13022996..13023997	19.0326	1.21148	2.31575	0.00942843	0.190751	1	protein_coding	K15261//poly [ADP-ribose] polymerase 10/14/15 [EC:2.4.2.30];K00573//protein-L-isoaspartate(D-aspartate) O-methyltransferase [EC:2.1.1.77];K12015//tripartite motif-containing protein 39 [EC:2.3.2.27]	AWP19037.1//putative GTPase IMAP family member 1-like [Scophthalmus maximus]
SMAX5B_018920	CP026255.1	complement(15163020..15166079)	101.082	1.2114	2.31563	0.00719107	0.164604	1	protein_coding	K21278//dual specificity protein phosphatase 1 [EC:3.1.3.16 3.1.3.48]	AWP12284.1//Dual specificity protein phosphatase 1 [Scophthalmus maximus]
SMAX5B_013119	CP026247.1	18734937..18762573	2.30925	1.21019	2.31367	0.00722385	0.164757	1	protein_coding	K06521//semaphorin 4	XP_022055247.1//semaphorin-4B [Acanthochromis polyacanthus]
SMAX5B_002372	CP026248.1	10829068..10831846	36.2151	1.20807	2.31028	0.000113695	0.0105184	1	protein_coding	K04701//cytokine inducible SH2-containing protein	XP_035487444.1//cytokine-inducible SH2-containing protein-like [Scophthalmus maximus]
SMAX5B_002053	CP026263.1	complement(8886491..8895617)	15.563	1.20159	2.29992	0.0057844	0.146134	1	protein_coding	K09052//cAMP response element modulator	AWP20938.1//putative cAMP-responsive element modulator [Scophthalmus maximus]
SMAX5B_012902	CP026246.1	complement(28444661..28456537)	14.3026	1.19929	2.29627	0.000847461	0.0415414	1	protein_coding	K14752//docking protein 1	AWP00879.1//IRS domain containing protein [Scophthalmus maximus]
SMAX5B_009531	CP026251.1	5081328..5086317	45.3892	1.18219	2.26921	0.000411217	0.0254819	1	protein_coding	K17508//protein phosphatase PTC7 [EC:3.1.3.16]	AWP06650.1//putative protein phosphatase PTC7 -like [Scophthalmus maximus]
SMAX5B_003909	CP026243.1	complement(1380494..1401480)	4.87013	1.18028	2.2662	2.3244e-05	0.00311588	0.401679	protein_coding	K23026//LIM domain and actin-binding protein 1;K18626//trichohyalin	AWO95576.1//putative xin actin-binding repeat-containing protein 2-like [Scophthalmus maximus]
SMAX5B_000368	CP026259.1	complement(8857182..8857967)	21.2853	1.17487	2.25773	0.00795359	0.173533	1	protein_coding	K07754//thyroxine 5-deiodinase [EC:1.21.99.3]	AWP16407.1//Iodothyronine deiodinase [Scophthalmus maximus]
SMAX5B_018950	CP026255.1	5224514..5231831	196.611	1.16528	2.24276	0.000353761	0.0231212	1	protein_coding	K00453//tryptophan 2,3-dioxygenase [EC:1.13.11.11]	AWP11736.1//putative tryptophan 2-3-dioxygenase isoform 3 [Scophthalmus maximus]
SMAX5B_018137	CP026258.1	complement(17076516..17084179)	9.07813	1.16375	2.24038	0.00650034	0.155264	1	protein_coding	K23029//EF-hand domain-containing protein 1	AWP15662.1//putative EF-hand domain-containing family member B [Scophthalmus maximus]
SMAX5B_004773	CP026256.1	20602487..20614255	18.2617	1.15702	2.22996	2.143e-05	0.00299496	0.370333	protein_coding	K08857//NIMA (never in mitosis gene a)-related kinase 1/4/5 [EC:2.7.11.1];K23573//dentin sialophosphoprotein	AWP13592.1//putative serine/threonine-protein kinase Nek5-like [Scophthalmus maximus]
SMAX5B_017454	CP026260.1	complement(17918700..17921165)	181.993	1.15237	2.22279	2.80968e-05	0.00358356	0.48554	protein_coding	K01084//glucose-6-phosphatase [EC:3.1.3.9]	AWP18007.1//putative glucose-6-phosphatase-like [Scophthalmus maximus]
SMAX5B_011508	CP026250.1	7985937..7992031	14.5745	1.14979	2.21882	0.00154317	0.0637505	1	protein_coding	K15103//solute carrier family 25 (mitochondrial uncoupling protein), member 8/9	XP_035491884.1//mitochondrial brown fat uncoupling protein 1 isoform X1 [Scophthalmus maximus]
SMAX5B_020870	CP026261.1	complement(9413059..9417039)	44.9619	1.14617	2.21326	0.000981003	0.0466936	1	protein_coding	K14443//protein Tob/BTG	AWP18791.1//Transducer of ERBB2 1b [Scophthalmus maximus]
SMAX5B_013777	CP026258.1	complement(12220153..12241905)	392.27	1.14094	2.20525	4.16433e-05	0.00496	0.719638	protein_coding	K12384//lysosome membrane protein 2	AWP15423.1//putative lysosome membrane protein 2 [Scophthalmus maximus]
SMAX5B_013383	CP026245.1	complement(14211504..14226789)	30.2453	1.13905	2.20237	0.00133746	0.0587633	1	protein_coding	K09115//MAX-binding protein	AWO99058.1//putative max-binding protein MNT [Scophthalmus maximus]
SMAX5B_009779	CP026252.1	complement(11151476..11158730)	167.129	1.13555	2.19703	0.00195457	0.0737967	1	protein_coding	K16816//patatin-like phospholipase domain-containing protein 2 [EC:3.1.1.3]	AWP08345.1//Adipose triglyceride lipase [Scophthalmus maximus]
SMAX5B_016799	CP026257.1	complement(20745547..20753777)	180.487	1.12907	2.18718	0.000633291	0.0351036	1	protein_coding	K03006//DNA-directed RNA polymerase II subunit RPB1 [EC:2.7.7.6]	AWP14682.1//Hypothetical protein SMAX5B_016799 [Scophthalmus maximus]
SMAX5B_010974	CP026251.1	7535094..7542842	367.501	1.12456	2.18035	0.000282034	0.0206562	1	protein_coding	K12330//Rho guanine nucleotide exchange factor 1;K22125//myoferlin	AWP06787.1//putative AN1-type zinc finger protein 5-like isoform 3 [Scophthalmus maximus]
SMAX5B_018367	CP026256.1	complement(14718280..14721699)	34.9511	1.12307	2.17811	0.000160811	0.0136295	1	protein_coding	K07187//insulin receptor substrate 2	AWP13271.1//putative insulin receptor substrate 2 [Scophthalmus maximus]
SMAX5B_000440	CP026259.1	complement(10953973..10975827)	18.7165	1.11115	2.16018	0.000824807	0.0410482	1	protein_coding	K17581//consortin	AWP16541.1//putative nutritionally-regulated adipose and cardiac enriched protein -like [Scophthalmus maximus]
SMAX5B_015930	CP026264.1	8553207..8575485	18.2438	1.10845	2.15614	0.000398115	0.024905	1	protein_coding	K23573//dentin sialophosphoprotein	AWP21637.1//putative protein FAM65B [Scophthalmus maximus]
SMAX5B_005208	CP026248.1	complement(7132957..7140003)	3675.62	1.10122	2.14535	0.00566153	0.144419	1	protein_coding	K07436//vitamin D3 24-hydroxylase [EC:1.14.15.16]	AWP02484.1//cyp24a1l [Scophthalmus maximus]
SMAX5B_018138	CP026258.1	17678498..17686865	42.6138	1.0948	2.13583	0.000112701	0.010504	1	protein_coding	NA	AWP15683.1//putative transmembrane protein 106B isoform 2 [Scophthalmus maximus]
SMAX5B_003942	CP026243.1	complement(1009724..1012617)	8.47066	1.09466	2.13562	0.00388699	0.115008	1	protein_coding	K23308//nuclear fragile X mental retardation-interacting protein 1	AWO95548.1//putative nuclear fragile X mental retardation-interacting protein 1 [Scophthalmus maximus]
SMAX5B_010089	CP026252.1	12640590..12671831	17.423	1.09086	2.13001	4.3527e-05	0.00510548	0.75219	protein_coding	K22644//voltage-gated hydrogen channel 1;K17382//serine beta-lactamase-like protein LACTB, mitochondrial	XP_035498761.1//transmembrane protein 266 [Scophthalmus maximus]
SMAX5B_017432	CP026260.1	17922310..17924672	167.976	1.08624	2.12319	7.33649e-05	0.00764381	1	protein_coding	K01084//glucose-6-phosphatase [EC:3.1.3.9]	AWP18008.1//Glucose-6-phosphatase 2 [Scophthalmus maximus]
SMAX5B_003440	CP026259.1	14062575..14069646	28.0163	1.07947	2.11327	0.000121534	0.0111021	1	protein_coding	K11996//adenylyltransferase and sulfurtransferase [EC:2.7.7.80 2.8.1.11]	AWP16722.1//putative adenylyltransferase and sulfurtransferase MOCS3-like isoform 2 [Scophthalmus maximus]
SMAX5B_005500	CP026244.1	complement(14306452..14336192)	2.0331	1.06879	2.09768	0.0077111	0.170828	1	protein_coding	K10395//kinesin family member 4/21/27	AWO97957.1//putative kinesin-like protein KIF21A [Scophthalmus maximus]
SMAX5B_013984	CP026258.1	complement(15763331..15769396)	7.93697	1.05996	2.08487	0.00568773	0.14471	1	protein_coding	NA	XP_035463947.1//protein rapunzel-like [Scophthalmus maximus]
SMAX5B_000773	CP026251.1	22130749..22137868	149.406	1.05897	2.08345	0.000684269	0.0369928	1	protein_coding	K16500//protocadherin-15;K23757	AWP07606.1//putative GRAM domain-containing protein 3 [Scophthalmus maximus]
SMAX5B_014219	CP026248.1	20821211..20841368	2.7657	1.0571	2.08075	0.00717222	0.164604	1	protein_coding	K04608//metabotropic glutamate receptor 6;K04609//metabotropic glutamate receptor 7;K00545//catechol O-methyltransferase [EC:2.1.1.6]	AWP03355.1//putative metabotropic glutamate receptor 6-like [Scophthalmus maximus]
SMAX5B_004820	CP026246.1	18559656..18565829	7.04497	1.05485	2.0775	0.00734633	0.165823	1	protein_coding	K08171//MFS transporter, OPA family, solute carrier family 37 (glycerol-6-phosphate transporter), member 4	XP_035482021.1//glucose-6-phosphate exchanger SLC37A4b [Scophthalmus maximus]
SMAX5B_019618	CP026262.1	12769631..12813541	14.0408	1.04444	2.06256	0.00147378	0.0626425	1	protein_coding	K10141//sestrin 1/3	AWP20100.1//putative sestrin-1 isoform 3 [Scophthalmus maximus]
SMAX5B_002239	CP026248.1	10810987..10824093	25.0861	1.03508	2.04923	0.003092	0.101044	1	protein_coding	K14962//COMPASS component SWD2;K08870//twinfilin	AWP02634.1//Cofilin ADF domain containing protein [Scophthalmus maximus]
SMAX5B_018912	CP026245.1	complement(22970191..22975107)	11.702	1.03364	2.04718	0.00926661	0.189615	1	protein_coding	K01166//ribonuclease T2 [EC:4.6.1.19]	AWO99463.1//putative ribonuclease T2-like [Scophthalmus maximus]
SMAX5B_001108	CP026256.1	18916864..18921708	6345.75	1.02355	2.03291	0.00728394	0.165153	1	protein_coding	K04387//interleukin 1 receptor type II	AWP13513.1//putative interleukin-1 receptor type 2-like [Scophthalmus maximus]
SMAX5B_012697	CP026247.1	8928905..8932823	53.7795	1.02294	2.03205	0.000135557	0.0120472	1	protein_coding	K18630//tektin-3	XP_035484674.1//transmembrane protein 208 [Scophthalmus maximus]
SMAX5B_004091	CP026246.1	16523370..16528094	14.9744	1.02082	2.02908	0.000736309	0.0383845	1	protein_coding	K11214//sedoheptulokinase [EC:2.7.1.14]	XP_035482310.1//sedoheptulokinase isoform X1 [Scophthalmus maximus]
SMAX5B_003223	CP026247.1	complement(26240902..26244121)	147.277	1.01938	2.02705	0.00315393	0.101238	1	protein_coding	K21247//tumor protein p53-inducible nuclear protein 2	AWP02039.1//putative tumor protein p53-inducible nuclear protein 2-like [Scophthalmus maximus]
SMAX5B_011687	CP026243.1	complement(16591921..16616148)	13.4527	1.00246	2.00341	0.00517926	0.136353	1	protein_coding	K07188//hormone-sensitive lipase [EC:3.1.1.79]	AWO96318.1//putative hormone-sensitive lipase [Scophthalmus maximus]
SMAX5B_010833	CP026251.1	complement(11774110..11785280)	3.86068	-1.00425	-2.0059	0.00492471	0.132303	1	protein_coding	K03255//protein TIF31	AWP07003.1//putative clustered mitochondria protein -like [Scophthalmus maximus]
SMAX5B_011382	CP026250.1	9062012..9066590	24.017	-1.00858	-2.01193	0.00268249	0.0920102	1	protein_coding	K01507//inorganic pyrophosphatase [EC:3.6.1.1]	AWP05506.1//putative inorganic pyrophosphatase-like isoform 2 [Scophthalmus maximus]
SMAX5B_007869	CP026254.1	complement(21042898..21068934)	4.61505	-1.01405	-2.01957	0.00766674	0.170419	1	protein_coding	K20994//Notch 2;K02599//Notch 1	AWP11437.1//putative sushi nidogen and EGF-like domain-containing protein 1 [Scophthalmus maximus]
SMAX5B_012722	CP026247.1	complement(16243442..16249019)	6.09372	-1.0266	-2.03721	0.00224756	0.0813395	1	protein_coding	NA	XP_035483322.1//phenazine biosynthesis-like domain-containing protein 1 [Scophthalmus maximus]
SMAX5B_019067	CP026255.1	complement(6032072..6036030)	25.2019	-1.02958	-2.04143	0.00357484	0.109983	1	protein_coding	NA	XP_035506163.1//uncharacterized protein si:ch211-153b23.4 [Scophthalmus maximus]
SMAX5B_000520	CP026253.1	complement(2280677..2327007)	9.18669	-1.03268	-2.04582	0.000626689	0.0350332	1	protein_coding	K20161//DENN domain-containing protein 2	AWP09168.1//putative DENN domain-containing protein 2D [Scophthalmus maximus]
SMAX5B_017989	CP026257.1	complement(4286307..4293506)	49.4064	-1.05126	-2.07233	0.00633346	0.153794	1	protein_coding	K04390//tumor necrosis factor receptor superfamily member 6	XP_035461411.1//tumor necrosis factor receptor superfamily member 6 [Scophthalmus maximus]
SMAX5B_008515	CP026257.1	11973404..12007018	23.0564	-1.0545	-2.077	0.00237127	0.0845517	1	protein_coding	K05093//fibroblast growth factor receptor 2 [EC:2.7.10.1]	XP_035462522.1//fibroblast growth factor receptor 2 isoform X5 [Scophthalmus maximus]
SMAX5B_003649	CP026258.1	complement(8542097..8547156)	21.4017	-1.05969	-2.08449	0.00153706	0.0636984	1	protein_coding	K06258//MFS transporter, VNT family, synaptic vesicle glycoprotein 2	XP_019937580.1//synaptic vesicle 2-related protein-like [Paralichthys olivaceus]
SMAX5B_014755	CP026253.1	20082913..20093360	4.79107	-1.06434	-2.09122	0.00988587	0.196774	1	protein_coding	K10955//mucin-2	XP_035501899.1//inter-alpha-trypsin inhibitor heavy chain H6 isoform X1 [Scophthalmus maximus]
SMAX5B_006566	CP026249.1	4962366..5097930	3.19347	-1.06733	-2.09555	0.00217579	0.0793983	1	protein_coding	K05695//receptor-type tyrosine-protein phosphatase F [EC:3.1.3.48]	XP_018533445.1//receptor-type tyrosine-protein phosphatase F isoform X8 [Lates calcarifer]
SMAX5B_002223	CP026248.1	complement(13183807..13193017)	121.883	-1.07124	-2.10124	2.49123e-05	0.00327273	0.430509	protein_coding	K17277//epidermal growth factor receptor kinase substrate 8	AWP02856.1//putative epidermal growth factor receptor kinase substrate 8-like protein 3 [Scophthalmus maximus]
SMAX5B_003767	CP026244.1	complement(3719471..3723265)	16.4334	-1.07173	-2.10195	0.00414612	0.120859	1	protein_coding	K08770//ubiquitin C;K11969//ariadne-2 [EC:2.3.2.31];K11968//ariadne-1 [EC:2.3.2.31]	XP_035469288.1//E3 ubiquitin-protein ligase RNF19B-like isoform X2 [Scophthalmus maximus]
SMAX5B_000611	CP026245.1	complement(19710837..19717282)	480.743	-1.08145	-2.11616	0.000283027	0.0206562	1	protein_coding	K01332//complement component 2 [EC:3.4.21.43]	XP_035477634.1//complement C2 [Scophthalmus maximus]
SMAX5B_006098	CP026249.1	complement(12450930..12451477)	1864.61	-1.08885	-2.12705	0.000576865	0.032949	1	protein_coding	K14624//C-C motif chemokine 2;K16595//C-C motif chemokine 13;K16597//C-C motif chemokine 11;K21097//C-C motif chemokine 24	XP_035491765.1//regakine-1-like [Scophthalmus maximus]
SMAX5B_004005	CP026246.1	complement(17042463..17059447)	23.8057	-1.09151	-2.13096	0.000181927	0.0150313	1	protein_coding	K09113//MAX-like protein X	AWP00440.1//putative carbohydrate-responsive element-binding protein [Scophthalmus maximus]
SMAX5B_005703	CP026251.1	954502..956337	1527.49	-1.09785	-2.14035	0.00382455	0.114449	1	protein_coding	K07818//perforin 1	AWP06477.1//C2 domain protein [Scophthalmus maximus]
SMAX5B_001188	CP026248.1	24246751..24250935	10.3745	-1.09928	-2.14248	0.000817114	0.0410482	1	protein_coding	K09429//E74-like factor 3	XP_035486936.1//ETS-related transcription factor Elf-3 [Scophthalmus maximus]
SMAX5B_015379	CP026252.1	complement(22534693..22575791)	24.2769	-1.09966	-2.14304	0.00453481	0.128544	1	protein_coding	K09228//KRAB domain-containing zinc finger protein;K10614//E3 ubiquitin-protein ligase HERC3 [EC:2.3.2.26];K09234//Wilms tumor protein 1;K10615//E3 ubiquitin-protein ligase HERC4 [EC:2.3.2.26]	AWP08934.1//putative E3 ubiquitin-protein ligase HERC4-like [Scophthalmus maximus]
SMAX5B_017461	CP026260.1	complement(17932737..17996701)	1.59706	-1.09979	-2.14324	0.000691913	0.0371006	1	protein_coding	K10380//ankyrin;K19607//X-linked retinitis pigmentosa GTPase regulator	AWP18010.1//Ankyrin-3 [Scophthalmus maximus]
SMAX5B_010901	CP026251.1	9122229..9130262	63.5756	-1.10003	-2.14359	0.00311496	0.101238	1	protein_coding	K10252//beta,beta-carotene 9',10'-dioxygenase [EC:1.13.11.71]	XP_035496537.1//beta-carotene 15, 15-dioxygenase 2, like isoform X1 [Scophthalmus maximus]
SMAX5B_015603	CP026264.1	complement(8760644..8768488)	2.42153	-1.10651	-2.15324	0.00968407	0.193932	1	protein_coding	K16805//protein FAM83D	AWP21674.1//putative protein FAM83H [Scophthalmus maximus]
SMAX5B_013003	CP026250.1	2355538..2358527	71.217	-1.1125	-2.1622	0.00108533	0.0507401	1	protein_coding	K22016//mucin-3/17	AWP05182.1//putative beta-galactoside-binding lectin-like isoform 2 [Scophthalmus maximus]
SMAX5B_011825	CP026243.1	19949251..19964670	20.2073	-1.12004	-2.17354	0.00148946	0.0626425	1	protein_coding	K06811//cadherin 17, LI cadherin	AWO96633.1//putative cadherin-17 [Scophthalmus maximus]
SMAX5B_007751	CP026244.1	19426190..19435788	15.6134	-1.12047	-2.17418	0.000774126	0.0399705	1	protein_coding	K15261//poly [ADP-ribose] polymerase 10/14/15 [EC:2.4.2.30];K15259//poly [ADP-ribose] polymerase 7/11/12/13 [EC:2.4.2.30]	XP_035502543.1//zinc finger CCCH-type antiviral protein 1 [Scophthalmus maximus]
SMAX5B_003050	CP026258.1	1954566..1976526	7.22662	-1.13528	-2.19661	0.0020274	0.0754503	1	protein_coding	K11661//helicase SRCAP [EC:3.6.4.-];K15708//E3 ubiquitin-protein ligase RNF180 [EC:2.3.2.27];K03995//complement component 6	AWP14916.1//putative complement component C6 [Scophthalmus maximus]
SMAX5B_009601	CP026264.1	complement(10869864..10928158)	9.15345	-1.13764	-2.20021	0.00423892	0.122388	1	protein_coding	K04576//calcitonin receptor;K23087//tissue factor pathway inhibitor 2	AWP21805.1//putative calcitonin gene-related peptide type 1 receptor-like [Scophthalmus maximus]
SMAX5B_006129	CP026249.1	complement(11613864..11621369)	6.93279	-1.13801	-2.20077	0.00472141	0.130874	1	protein_coding	NA	AWP04180.1//putative protein FAM102B isoform 2 [Scophthalmus maximus]
SMAX5B_011762	CP026243.1	16467182..16468652	2092.04	-1.14039	-2.20441	0.00223991	0.0812864	1	protein_coding	K08760//apolipoprotein A-IV	XP_035493452.1//apolipoprotein A-I-like [Scophthalmus maximus]
SMAX5B_006793	CP026246.1	complement(6246235..6270747)	13.5427	-1.14061	-2.20474	1.5057e-05	0.00232711	0.260201	protein_coding	K18626//trichohyalin;K19948//MICAL-like protein 1	AWO99896.1//putative EH domain-binding protein 1-like [Scophthalmus maximus]
SMAX5B_013787	CP026258.1	11029121..11031357	10.0217	-1.14701	-2.21454	0.00858419	0.181595	1	protein_coding	NA	AWP15365.1//Hypothetical protein SMAX5B_013787 [Scophthalmus maximus]
SMAX5B_011490	CP026250.1	6033038..6037310	101.986	-1.1505	-2.21991	0.00136362	0.059713	1	protein_coding	K23506//apoptogenic protein 1;K13172//serine/arginine repetitive matrix protein 2;K13171//serine/arginine repetitive matrix protein 1;K23829//TNFAIP3-interacting protein 1	AWP05367.1//putative TNFAIP3-interacting protein 2 [Scophthalmus maximus]
SMAX5B_003545	CP026258.1	complement(7144482..7176431)	2.0145	-1.16153	-2.23695	0.00921561	0.189615	1	protein_coding	K00314//sarcosine dehydrogenase [EC:1.5.8.3]	AWP15128.1//putative sarcosine dehydrogenase mitochondrial [Scophthalmus maximus]
SMAX5B_015145	CP026258.1	5421393..5426435	29.4111	-1.16563	-2.24331	3.40816e-05	0.00426409	0.588964	protein_coding	K14614//MFS transporter, PCFT/HCP family, solute carrier family 46 (thymic stromal cotransporter), member 2	XP_035463615.1//thymic stromal cotransporter homolog [Scophthalmus maximus]
SMAX5B_014491	CP026253.1	19632279..19653069	335.268	-1.16679	-2.24511	0.000194921	0.0155739	1	protein_coding	K23026//LIM domain and actin-binding protein 1;K23573//dentin sialophosphoprotein	AWP10052.1//putative LIM domain and actin-binding protein 1-like [Scophthalmus maximus]
SMAX5B_002881	CP026252.1	complement(7381546..7386326)	6.28312	-1.16717	-2.24571	0.00158559	0.0646892	1	protein_coding	K00251//3-oxo-5-beta-steroid 4-dehydrogenase [EC:1.3.1.3]	AWP08103.1//3-oxo-5-beta-steroid 4-dehydrogenase isoform 2 [Scophthalmus maximus]
SMAX5B_007818	CP026244.1	19221309..19232053	21.2203	-1.17047	-2.25086	0.00315794	0.101238	1	protein_coding	NA	AWO98116.1//HILPDA domain containing protein isoform 2 [Scophthalmus maximus]
SMAX5B_022305	CP026254.1	complement(15886109..15902106)	35.7909	-1.17164	-2.25268	0.00033653	0.0226717	1	protein_coding	K09048//cyclic AMP-responsive element-binding protein 3;K08397//relaxin family peptide receptor 3	AWP11136.1//putative cyclic AMP-responsive element-binding protein 3-like protein 3-B [Scophthalmus maximus]
SMAX5B_011037	CP026251.1	9312451..9406869	7.55769	-1.17908	-2.26433	6.4511e-05	0.00694657	1	protein_coding	K18263//adhesion G-protein coupled receptor V1	XP_035494853.1//adhesion G-protein coupled receptor V1 [Scophthalmus maximus]
SMAX5B_002364	CP026248.1	13159576..13182607	91.1069	-1.18048	-2.26652	7.38954e-05	0.00764381	1	protein_coding	K01490//AMP deaminase [EC:3.5.4.6]	XP_035486944.1//AMP deaminase 2-like isoform X2 [Scophthalmus maximus]
SMAX5B_017213	CP026243.1	12803391..12827551	2.6235	-1.18413	-2.27227	0.00797851	0.173533	1	protein_coding	K23560//zinc finger homeobox protein 2	AWO96128.1//putative zinc finger E-box-binding homeobox 2 [Scophthalmus maximus]
SMAX5B_004569	CP026245.1	9345627..9382216	1.55926	-1.19524	-2.28983	0.0029404	0.0981125	1	protein_coding	K08873//serine/threonine-protein kinase SMG1 [EC:2.7.11.1]	XP_018520784.1//protein furry homolog isoform X9 [Lates calcarifer]
SMAX5B_010170	CP026245.1	complement(16547729..16550004)	46.0091	-1.19774	-2.2938	9.93235e-07	0.000296548	0.0171641	protein_coding	K02842//frizzled 9/10	AWO99168.1//putative frizzled-9-like [Scophthalmus maximus]
SMAX5B_015720	CP026264.1	5125799..5132099	3.02454	-1.20919	-2.31208	0.00822193	0.177068	1	protein_coding	K18668//ribonuclease ZC3H12 [EC:3.1.-.-]	AWP21450.1//putative ribonuclease ZC3H12A-like [Scophthalmus maximus]
SMAX5B_010953	CP026251.1	7341694..7360095	2.06081	-1.2111	-2.31513	0.000733995	0.0383845	1	protein_coding	K04981//transient receptor potential cation channel subfamily M member 6 [EC:2.7.11.1]	AWP06776.1//putative transient receptor potential cation channel subfamily M member 6 [Scophthalmus maximus]
SMAX5B_019518	CP026253.1	complement(306243..330030)	4.63588	-1.21276	-2.3178	0.00551302	0.141178	1	protein_coding	K17896//GATA-binding protein 5	AWP09090.1//putative transcription factor GATA-5, partial [Scophthalmus maximus]
SMAX5B_020562	CP026260.1	19960575..19973502	3.56164	-1.21837	-2.32684	0.00931189	0.189615	1	protein_coding	K23695	AWP18129.1//putative growth factor receptor-bound protein 7-like [Scophthalmus maximus]
SMAX5B_022431	CP026254.1	complement(5307628..5309958)	4.98298	-1.22012	-2.32966	0.00315232	0.101238	1	protein_coding	K06829//insulin-like growth factor-binding protein 10	AWP10641.1//putative protein CYR61 [Scophthalmus maximus]
SMAX5B_015639	CP026264.1	10090146..10098945	48.7846	-1.22042	-2.33014	7.74492e-05	0.00788721	1	protein_coding	K18266//protein NDRG1	AWP21775.1//putative protein NDRG1-like [Scophthalmus maximus]
SMAX5B_003793	CP026244.1	complement(3729681..3732244)	33.4976	-1.22322	-2.33467	0.00403244	0.11828	1	protein_coding	K08770//ubiquitin C;K11969//ariadne-2 [EC:2.3.2.31];K11968//ariadne-1 [EC:2.3.2.31]	XP_035475490.1//probable E3 ubiquitin-protein ligase ARI5 [Scophthalmus maximus]
SMAX5B_004876	CP026246.1	complement(19368499..19369113)	28.2617	-1.22788	-2.34222	0.00965318	0.193609	1	protein_coding	K20478//golgin subfamily B member 1	AWP00555.1//putative golgin subfamily A member 6-like protein 22 [Scophthalmus maximus]
SMAX5B_009947	CP026252.1	complement(9993897..10006239)	2.30828	-1.24132	-2.36415	0.00313385	0.101238	1	protein_coding	K00923//phosphatidylinositol-4-phosphate 3-kinase [EC:2.7.1.154]	AWP08231.1//putative phosphatidylinositol 4-phosphate 3-kinase C2 domain-containing subunit gamma [Scophthalmus maximus]
SMAX5B_004257	CP026246.1	complement(11846505..11851591)	90.637	-1.24171	-2.36479	4.01582e-05	0.0048848	0.693975	protein_coding	K00968//choline-phosphate cytidylyltransferase [EC:2.7.7.15]	XP_035481671.1//choline-phosphate cytidylyltransferase B-like [Scophthalmus maximus]
SMAX5B_008923	CP026255.1	13373416..13387441	11.4749	-1.24226	-2.36569	0.00145271	0.0621635	1	protein_coding	K00820//glutamine---fructose-6-phosphate transaminase (isomerizing) [EC:2.6.1.16]	XP_035506174.1//glutamine--fructose-6-phosphate aminotransferase [isomerizing] 2 [Scophthalmus maximus]
SMAX5B_022391	CP026254.1	16592682..16595498	3.55713	-1.24612	-2.37203	0.00620261	0.152306	1	protein_coding	K15085//solute carrier family 25, member 42	XP_035503702.1//mitochondrial coenzyme A transporter SLC25A42-like [Scophthalmus maximus]
SMAX5B_002775	CP026248.1	3000313..3006112	61.4237	-1.2468	-2.37315	0.000517044	0.0303233	1	protein_coding	K13700//abhydrolase domain-containing protein 6 [EC:3.1.1.23]	AWP02291.1//putative monoacylglycerol lipase ABHD6 [Scophthalmus maximus]
SMAX5B_015241	CP026251.1	complement(25230977..25239536)	3.6359	-1.25126	-2.3805	0.00725896	0.164984	1	protein_coding	K23399//MAX gene-associated protein;K10512//zinc finger and BTB domain-containing protein 40;K07520//actin-binding LIM protein	AWP07776.1//putative dematin-like, partial [Scophthalmus maximus]
SMAX5B_022065	CP026251.1	12333654..12340418	107.046	-1.25497	-2.38662	0.00202266	0.0754503	1	protein_coding	K12671//C-X-C motif chemokine 10	XP_035496612.1//protein FAM151B [Scophthalmus maximus]
SMAX5B_020829	CP026261.1	complement(14193220..14210255)	196.815	-1.26372	-2.40113	0.00880915	0.184724	1	protein_coding	K13825//hemoglobin subunit epsilon	AWP19132.1//Hemoglobin beta-2 subunit [Scophthalmus maximus]
SMAX5B_008154	CP026262.1	4499259..4508994	2.79611	-1.26754	-2.4075	0.00627156	0.153426	1	protein_coding	K06237//collagen, type IV, alpha;K15503//serine/threonine-protein phosphatase 6 regulatory ankyrin repeat subunit B	XP_034435866.1//EMILIN-1a [Hippoglossus hippoglossus]
SMAX5B_015560	CP026264.1	9784077..9789358	2.89948	-1.26813	-2.40849	0.00949871	0.191094	1	protein_coding	K17598//synaptotagmin-like protein	AWP21744.1//putative synaptotagmin-like protein 1-like [Scophthalmus maximus]
SMAX5B_009245	CP026254.1	1577733..1619590	12.5281	-1.26886	-2.40972	2.42774e-06	0.000540564	0.0419538	protein_coding	K18080//tensin	AWP10483.1//putative tensin-3-like [Scophthalmus maximus]
SMAX5B_006305	CP026261.1	complement(4473394..4494150)	12.3899	-1.27083	-2.41301	0.000309011	0.0214787	1	protein_coding	K11155//diacylglycerol O-acyltransferase 1 [EC:2.3.1.20 2.3.1.75 2.3.1.76];K17348//tetraspanin-1;K16602//tubulin polyglutamylase TTLL5 [EC:6.-.-.-];K02741//20S proteasome subunit beta 9 [EC:3.4.25.1]	AWP18438.1//putative tetratricopeptide repeat protein 39A-like [Scophthalmus maximus]
SMAX5B_008055	CP026248.1	complement(1323231..1338110)	1.56155	-1.27479	-2.41964	0.00831788	0.177967	1	protein_coding	K19475//WAS/WASL-interacting protein;K20639//Rho GTPase-activating protein 18/28/40;K09188//[histone H3]-lysine4 N-trimethyltransferase MLL3 [EC:2.1.1.354]	AWP02235.1//putative protein FAM65C [Scophthalmus maximus]
SMAX5B_006016	CP026249.1	3599310..3614764	4.21423	-1.28129	-2.43057	0.00186476	0.0718398	1	protein_coding	K04679//MAD, mothers against decapentaplegic interacting protein	AWP03722.1//putative zinc finger FYVE domain-containing protein 9 [Scophthalmus maximus]
SMAX5B_014307	CP026248.1	complement(17688703..17696288)	7.82478	-1.28541	-2.43751	0.000898543	0.0435578	1	protein_coding	K18626//trichohyalin	XP_035486708.1//trichohyalin-like [Scophthalmus maximus]
SMAX5B_004827	CP026246.1	complement(19369143..19373269)	41.9833	-1.29367	-2.45151	0.00142933	0.0615645	1	protein_coding	K20478//golgin subfamily B member 1	AWP00556.1//putative trichohyalin-like [Scophthalmus maximus]
SMAX5B_011662	CP026252.1	3239384..3297838	3.13954	-1.29752	-2.45807	0.00901559	0.188284	1	protein_coding	K11109//protection of telomeres protein 1	AWP07917.1//putative protection of telomeres protein 1-like [Scophthalmus maximus]
SMAX5B_014945	CP026253.1	17982290..18023388	0.793216	-1.29994	-2.46219	0.00532457	0.137966	1	protein_coding	K04960//inositol 1,4,5-triphosphate receptor type 3	XP_035501015.1//inositol 1,4,5-trisphosphate receptor type 3 [Scophthalmus maximus]
SMAX5B_015903	CP026264.1	9205653..9214296	1.39949	-1.30046	-2.46307	0.00871605	0.183204	1	protein_coding	K06062//histone acetyltransferase [EC:2.3.1.48]	XP_035476696.1//histone acetyltransferase KAT2B isoform X2 [Scophthalmus maximus]
SMAX5B_003103	CP026264.1	complement(371603..385160)	3.73733	-1.30404	-2.46919	0.00902939	0.188284	1	protein_coding	K05417//interleukin 11;K08858//serine/threonine-protein kinase SBK [EC:2.7.11.1]	AWP21138.1//putative serine/threonine-protein kinase SBK2-like [Scophthalmus maximus]
SMAX5B_014781	CP026253.1	complement(16423848..16426036)	4.45596	-1.30517	-2.47112	0.000657127	0.03612	1	protein_coding	K14427//solute carrier family 12 (potassium/chloride transporter), member 4/5/6;K06580//ammonium transporter Rh	AWP09870.1//putative ammonium transporter Rh type B-like [Scophthalmus maximus]
SMAX5B_011758	CP026243.1	17917499..17922689	5.83036	-1.30824	-2.47639	0.00427132	0.122784	1	protein_coding	K17700//RAP1 GTPase activating protein 1	AWO96432.1//putative rap1 GTPase-activating protein 2-like isoform 3 [Scophthalmus maximus]
SMAX5B_003959	CP026252.1	complement(21770212..21800114)	20.6116	-1.31033	-2.47998	0.000174633	0.0146124	1	protein_coding	K22615//NLR family CARD domain containing 5	XP_035498014.1//protein NLRC5 isoform X2 [Scophthalmus maximus]
SMAX5B_019137	CP026255.1	complement(18589819..18596795)	19.4753	-1.31608	-2.48988	0.000136528	0.0120472	1	protein_coding	K17577//SH2 domain-containing protein 4A	AWP12462.1//putative SH2 domain-containing protein 4A-like [Scophthalmus maximus]
SMAX5B_010577	CP026244.1	complement(21347805..21368540)	21.4158	-1.32035	-2.49727	5.36678e-05	0.00597487	0.927434	protein_coding	K00500//phenylalanine-4-hydroxylase [EC:1.14.16.1]	AWO98231.1//Phenylalanine-4-hydroxylase [Scophthalmus maximus]
SMAX5B_001835	CP026263.1	5677163..5684957	7.79166	-1.32387	-2.50337	0.000356827	0.0232061	1	protein_coding	K08037//hepatocyte nuclear factor 4-gamma	AWP20794.1//putative hepatocyte nuclear factor 4-gamma [Scophthalmus maximus]
SMAX5B_018752	CP026251.1	958314..961741	205.078	-1.3267	-2.50828	0.000536046	0.0309369	1	protein_coding	K07818//perforin 1	XP_035495750.1//perforin-1 [Scophthalmus maximus]
SMAX5B_021538	CP026246.1	2188826..2220395	7.42012	-1.34061	-2.53258	0.000384912	0.0244279	1	protein_coding	K10422//CAP-Gly domain-containing linker protein 2	AWO99680.1//putative CAP-Gly domain-containing linker protein 2 [Scophthalmus maximus]
SMAX5B_014146	CP026248.1	18152704..18156523	10.2081	-1.35556	-2.55897	9.34499e-05	0.00913071	1	protein_coding	K16605//tubulin polyglutamylase complex subunit 2	AWP03194.1//putative tubulin polyglutamylase complex subunit 2 [Scophthalmus maximus]
SMAX5B_010870	CP026251.1	8315752..8318501	8.35724	-1.35849	-2.56416	0.00242883	0.0860021	1	protein_coding	K15689//E3 ubiquitin-protein ligase NEURL3 [EC:2.3.2.27]	AWP06825.1//Ubiquitin protein ligase Neurl3 [Scophthalmus maximus]
SMAX5B_001714	CP026263.1	complement(2172869..2211489)	3.1045	-1.36269	-2.57164	0.00156068	0.0640708	1	protein_coding	K15731//carboxy-terminal domain RNA polymerase II polypeptide A small phosphatase [EC:3.1.3.16];K05761//villin 1	AWP20604.1//putative villin-like protein [Scophthalmus maximus]
SMAX5B_010818	CP026251.1	11548366..11597986	1.10538	-1.36408	-2.57413	0.00738953	0.166226	1	protein_coding	K23217//SET-binding protein;K08716//solute carrier family 14 (urea transporter)	AWP06982.1//putative SET-binding protein-like [Scophthalmus maximus]
SMAX5B_011316	CP026250.1	6317597..6323263	6.73277	-1.36913	-2.58315	0.00342781	0.106205	1	protein_coding	K04694//suppressor of cytokine signaling 1	AWP05387.1//putative suppressor of cytokine signaling 1-like [Scophthalmus maximus]
SMAX5B_002666	CP026253.1	5859955..5867929	34.1111	-1.36928	-2.58341	4.4204e-05	0.0051146	0.76389	protein_coding	K08538//farnesoid X receptor beta	AWP09295.1//putative bile acid receptor-like [Scophthalmus maximus]
SMAX5B_014471	CP026253.1	10189702..10191194	16.5366	-1.37044	-2.5855	0.000361203	0.023375	1	protein_coding	K23637//WAP four-disulfide core domain protein 3	XP_035501781.1//WAP four-disulfide core domain protein 18 [Scophthalmus maximus]
SMAX5B_005170	CP026248.1	complement(7313314..7317977)	5.10719	-1.37452	-2.59281	0.00658378	0.155854	1	protein_coding	K00006//glycerol-3-phosphate dehydrogenase (NAD+) [EC:1.1.1.8]	AWP02491.1//Glycerol-3-phosphate dehydrogenase isoform 2 [Scophthalmus maximus]
SMAX5B_012799	CP026252.1	18669937..18674823	20.8029	-1.3855	-2.61263	0.00023179	0.0174001	1	protein_coding	K04441//p38 MAP kinase [EC:2.7.11.24]	AWP08777.1//Mitogen-activated protein kinase [Scophthalmus maximus]
SMAX5B_015489	CP026249.1	complement(133806..142428)	176.909	-1.38599	-2.61352	0.00272697	0.0929714	1	protein_coding	K22614//NLR family CARD domain-containing protein 3;K14026//SEL1 protein	AWP03558.1//Hypothetical protein SMAX5B_015489 [Scophthalmus maximus]
SMAX5B_019914	CP026245.1	7276374..7280369	3.8366	-1.3877	-2.61661	0.00496615	0.133143	1	protein_coding	K15101//solute carrier family 25 (mitochondrial ornithine transporter) member 2/15	XP_035479784.1//solute carrier family 25 member 15a [Scophthalmus maximus]
SMAX5B_020616	CP026260.1	complement(20448689..20477267)	7.26915	-1.38986	-2.62053	0.00080081	0.0409348	1	protein_coding	K05627//BAI1-associated protein 2	AWP18165.1//putative brain-specific angiogenesis inhibitor 1-associated protein 2-like [Scophthalmus maximus]
SMAX5B_003404	CP026259.1	complement(16595806..16596531)	7.32614	-1.39073	-2.62212	0.00433674	0.124121	1	protein_coding	K13868//solute carrier family 7 (L-type amino acid transporter), member 9	AWP16825.1//putative b(0-+)-type amino acid transporter 1-like [Scophthalmus maximus]
SMAX5B_015060	CP026258.1	3186242..3221629	3.66096	-1.39793	-2.63524	0.000312892	0.0215207	1	protein_coding	K22655//immunoglobulin superfamily member 9	AWP14990.1//putative protein turtle -like A-like [Scophthalmus maximus]
SMAX5B_001729	CP026263.1	complement(7187788..7200373)	2.7602	-1.4031	-2.64469	0.000305655	0.0214727	1	protein_coding	K10955//mucin-2;K22016//mucin-3/17	XP_035474735.2//mucin-5AC isoform X1 [Scophthalmus maximus]
SMAX5B_000009	CP026262.1	16225615..16271067	0.722578	-1.40721	-2.65223	0.00980894	0.195836	1	protein_coding	K11542//protein CASC5;K08077//UDP-sugar diphosphatase [EC:3.6.1.45]	AWP20304.1//putative protein CASC5 [Scophthalmus maximus]
SMAX5B_015951	CP026259.1	19480692..19532030	2.45665	-1.41187	-2.66083	0.000223102	0.0170078	1	protein_coding	K19511//peroxidase [EC:1.11.1.7]	XP_035466187.1//peroxidasin isoform X1 [Scophthalmus maximus]
SMAX5B_015101	CP026258.1	complement(3074924..3083341)	23.3862	-1.42714	-2.68913	0.000131219	0.0118884	1	protein_coding	K05768//gelsolin	XP_018548603.1//gelsolin isoform X2 [Lates calcarifer]
SMAX5B_010625	CP026244.1	21711631..21716298	198.442	-1.43471	-2.70328	1.96745e-05	0.00277918	0.339995	protein_coding	K13172//serine/arginine repetitive matrix protein 2	XP_035476700.1//apoptosis facilitator Bcl-2-like protein 14 [Scophthalmus maximus]
SMAX5B_000458	CP026259.1	complement(11090627..11131381)	0.940711	-1.43752	-2.70855	0.00415886	0.120874	1	protein_coding	K10404//kinesin family member 26	AWP16542.1//putative kinesin-like protein KIF26A-like [Scophthalmus maximus]
SMAX5B_001903	CP026250.1	17913320..17922370	3.86302	-1.4494	-2.73095	0.00110521	0.0514865	1	protein_coding	K21988//transmembrane channel-like protein;K06727//Fc receptor-like protein	AWP06116.1//putative Fc receptor-like protein 5 [Scophthalmus maximus]
SMAX5B_005948	CP026261.1	3858537..3866012	13.0176	-1.45606	-2.74359	0.00690475	0.160773	1	protein_coding	K20639//Rho GTPase-activating protein 18/28/40	AWP18406.1//Hypothetical protein SMAX5B_005948 [Scophthalmus maximus]
SMAX5B_010986	CP026251.1	complement(5607442..5635484)	1.49033	-1.45709	-2.74553	0.000677648	0.0367862	1	protein_coding	K17707//dedicator of cytokinesis protein 5	XP_008274910.1//dedicator of cytokinesis protein 5 isoform X2 [Stegastes partitus]
SMAX5B_012830	CP026252.1	complement(18423312..18426634)	5.61811	-1.45744	-2.7462	0.00639596	0.154172	1	protein_coding	K12023//tripartite motif-containing protein 47;K12006//tripartite motif-containing protein 16	AWP08752.1//putative tripartite motif-containing protein 16-like [Scophthalmus maximus]
SMAX5B_011291	CP026260.1	complement(2265157..2372076)	2.41157	-1.4598	-2.7507	0.00321752	0.102238	1	protein_coding	K10361//myosin XV	AWP17109.1//putative unconventional myosin-XV-like [Scophthalmus maximus]
SMAX5B_010645	CP026244.1	complement(20741767..20766149)	4.2836	-1.46858	-2.76749	0.000350156	0.0231156	1	protein_coding	K01908//propionyl-CoA synthetase [EC:6.2.1.17]	AWO98200.1//putative acyl-CoA synthetase short-chain family member 3 mitochondrial [Scophthalmus maximus]
SMAX5B_000162	CP026262.1	17261859..17266484	10.3355	-1.47594	-2.78164	0.00304153	0.0998913	1	protein_coding	K19720//collagen, type III, alpha;K13171//serine/arginine repetitive matrix protein 1	AWP20350.1//selenoprotein L [Scophthalmus maximus]
SMAX5B_017639	CP026254.1	complement(18506543..18510810)	5.48082	-1.48385	-2.79694	0.00316731	0.101238	1	protein_coding	K00485//dimethylaniline monooxygenase (N-oxide forming) [EC:1.14.13.8]	XP_018525670.1//dimethylaniline monooxygenase [N-oxide-forming] 5-like isoform X1 [Lates calcarifer]
SMAX5B_009733	CP026252.1	complement(9106103..9125386)	1.77823	-1.49495	-2.81855	0.00334719	0.104945	1	protein_coding	K12327//caldesmon;K12045//troponin T, cardiac muscle	AWP08168.1//putative caldesmon-like [Scophthalmus maximus]
SMAX5B_021590	CP026250.1	1014035..1021581	75.3852	-1.5047	-2.83765	1.46932e-09	1.07236e-06	2.53913e-05	protein_coding	K15014//solute carrier family 29 (equilibrative nucleoside transporter), member 1/2/3	XP_035494196.1//equilibrative nucleoside transporter 1-like isoform X3 [Scophthalmus maximus]
SMAX5B_010630	CP026244.1	complement(2963492..2970552)	23.3814	-1.50638	-2.84097	0.000194186	0.0155739	1	protein_coding	K15261//poly [ADP-ribose] polymerase 10/14/15 [EC:2.4.2.30]	AWO97418.1//putative GTPase IMAP family member 7-like [Scophthalmus maximus]
SMAX5B_021716	CP026258.1	complement(21446672..21452335)	14.2463	-1.51132	-2.85071	0.00298837	0.0988872	1	protein_coding	K17358//tetraspanin-19;K06509//CD82 antigen	AWP15884.1//putative leukocyte antigen CD37-like, partial [Scophthalmus maximus]
SMAX5B_018457	CP026256.1	complement(13058172..13084535)	11.3525	-1.51983	-2.86758	1.56237e-05	0.00238662	0.269994	protein_coding	K21853//dedicator of cytokinesis protein 9/10/11	AWP13170.1//putative dedicator of cytokinesis protein 9 [Scophthalmus maximus]
SMAX5B_010321	CP026251.1	17169429..17180893	3.38146	-1.52551	-2.87889	9.71663e-05	0.00938583	1	protein_coding	K06639//cell division cycle 14 [EC:3.1.3.16 3.1.3.48]	AWP07323.1//putative dual specificity protein phosphatase CDC14B isoform 6 [Scophthalmus maximus]
SMAX5B_017376	CP026260.1	15332696..15341163	3.00904	-1.53275	-2.89336	0.00319615	0.101912	1	protein_coding	K06834//disintegrin and metalloproteinase domain-containing protein 9 [EC:3.4.24.-]	AWP17868.1//putative disintegrin and metalloproteinase domain-containing protein 9-like [Scophthalmus maximus]
SMAX5B_015936	CP026264.1	6262750..6266291	356.742	-1.53892	-2.90577	0.00193112	0.0737967	1	protein_coding	K01312//trypsin [EC:3.4.21.4]	XP_035477143.1//trypsin-like [Scophthalmus maximus]
SMAX5B_015830	CP026264.1	8737858..8744998	3.62781	-1.53916	-2.90626	0.00582478	0.146872	1	protein_coding	K19603//mitogen-activated protein kinase 15 [EC:2.7.11.24]	AWP21670.1//putative mitogen-activated protein kinase 15-like [Scophthalmus maximus]
SMAX5B_009628	CP026264.1	complement(11026605..11037608)	2.66828	-1.54096	-2.90988	0.00507495	0.134728	1	protein_coding	K12565//alpha-sarcoglycan	AWP21812.1//putative epsilon-sarcoglycan [Scophthalmus maximus]
SMAX5B_022249	CP026254.1	complement(4593751..4602202)	16.0328	-1.54479	-2.91761	0.00600939	0.149518	1	protein_coding	K06569//melanoma-associated antigen p97	AWP10619.1//Transferrin domain containing protein [Scophthalmus maximus]
SMAX5B_014506	CP026253.1	complement(20136150..20153389)	3.95651	-1.54792	-2.92396	8.48993e-05	0.00851391	1	protein_coding	K19947//F-actin monooxygenase [EC:1.14.13.225]	AWP10098.1//putative protein-methionine sulfoxide oxidase mical1-like [Scophthalmus maximus]
SMAX5B_005644	CP026247.1	2903204..2986525	7.08183	-1.55591	-2.94019	1.52957e-06	0.000393999	0.0264325	protein_coding	K19483//neuron navigator 2 [EC:3.6.4.12]	AWP01174.1//putative neuron navigator 2 [Scophthalmus maximus]
SMAX5B_018452	CP026256.1	complement(7079791..7135459)	17.7443	-1.55785	-2.94414	2.63364e-07	9.10477e-05	0.00455119	protein_coding	K10356//myosin I	XP_018560338.1//unconventional myosin-Ib isoform X6 [Lates calcarifer]
SMAX5B_014608	CP026253.1	13935331..13949413	5.45997	-1.55975	-2.94803	0.00396936	0.117181	1	protein_coding	K12327//caldesmon;K10371//troponin I, slow skeletal muscle	AWP09730.1//putative ladinin-1 [Scophthalmus maximus]
SMAX5B_014396	CP026248.1	complement(21840479..21933755)	1.39277	-1.56311	-2.95491	0.00466283	0.129779	1	protein_coding	K15682//ligand of Numb protein X 3/4 [EC:2.3.2.27]	AWP03385.1//putative E3 ubiquitin-protein ligase PDZRN3 [Scophthalmus maximus]
SMAX5B_019861	CP026245.1	complement(5825825..5838828)	1.75584	-1.569	-2.96699	0.00997794	0.198006	1	protein_coding	K08670//suppressor of tumorigenicity protein 14 [EC:3.4.21.109]	XP_023271859.1//suppressor of tumorigenicity 14 protein homolog isoform X2 [Seriola lalandi dorsalis]
SMAX5B_009824	CP026252.1	complement(11096112..11106866)	3.79785	-1.57239	-2.97397	0.000632194	0.0351036	1	protein_coding	K16779//Rab-3A-interacting protein	XP_035498301.1//guanine nucleotide exchange factor for Rab-3A isoform X6 [Scophthalmus maximus]
SMAX5B_009415	CP026255.1	10022376..10028462	4.39171	-1.5778	-2.98515	0.00242997	0.0860021	1	protein_coding	K12888//heterogeneous nuclear ribonucleoprotein U;K15047//heterogeneous nuclear ribonucleoprotein U-like protein 1	AWP11944.1//putative heterogeneous nuclear ribonucleoprotein U-like protein 2 [Scophthalmus maximus]
SMAX5B_016291	CP026249.1	25635009..25651442	62.2788	-1.58744	-3.00516	4.38092e-06	0.000872003	0.0757068	protein_coding	K08824//cyclin-dependent kinase-like [EC:2.7.11.22]	XP_035489623.1//sodium-dependent lysophosphatidylcholine symporter 1-B [Scophthalmus maximus]
SMAX5B_014258	CP026248.1	14896329..14911080	7.73431	-1.58966	-3.00978	3.6096e-06	0.000740927	0.0623775	protein_coding	K23026//LIM domain and actin-binding protein 1	AWP02998.1//putative LIM domain and actin-binding protein 1-like [Scophthalmus maximus]
SMAX5B_002389	CP026248.1	11124386..11137799	5.10436	-1.59288	-3.01652	2.40836e-05	0.00319583	0.416189	protein_coding	K05103//Eph receptor A2 [EC:2.7.10.1]	AWP02664.1//putative ephrin type-A receptor 2-like [Scophthalmus maximus]
SMAX5B_017751	CP026257.1	complement(19861664..19868357)	3.86661	-1.59614	-3.02332	0.00126608	0.0569606	1	protein_coding	K22523//sulfotransferase 6B1 [EC:2.8.2.-]	AWP14641.1//putative sulfotransferase 6B1 [Scophthalmus maximus]
SMAX5B_007409	CP026250.1	complement(11307423..11319315)	0.839535	-1.5969	-3.02492	0.00520288	0.1367	1	protein_coding	K19671//WD repeat-containing protein 19	AWP05648.1//putative WD repeat-containing protein 19 [Scophthalmus maximus]
SMAX5B_011458	CP026250.1	7075596..7137213	1.76732	-1.60735	-3.04692	0.00201976	0.0754503	1	protein_coding	K08555//mineralocorticoid receptor	AWP05426.1//Mineralocorticoid receptor [Scophthalmus maximus]
SMAX5B_009047	CP026259.1	1937767..1940421	7.13063	-1.60947	-3.0514	0.00508595	0.134728	1	protein_coding	K16817//HRAS-like suppressor 3 [EC:3.1.1.32 3.1.1.4]	AWP16011.1//Group XVI phospholipase A2 [Scophthalmus maximus]
SMAX5B_014757	CP026253.1	complement(11542340..11544321)	4.64171	-1.60979	-3.05208	0.000950142	0.0453891	1	protein_coding	K03283//heat shock 70kDa protein 1/2/6/8	XP_035500186.1//heat shock 70 kDa protein 1B [Scophthalmus maximus]
SMAX5B_000908	CP026243.1	6562106..6569826	14.7124	-1.61128	-3.05523	0.000248285	0.0185325	1	protein_coding	K01540//sodium/potassium-transporting ATPase subunit beta	AWO95850.1//putative sodium/potassium-transporting ATPase subunit beta-233-like [Scophthalmus maximus]
SMAX5B_020023	CP026246.1	complement(20315993..20322207)	4.59389	-1.61271	-3.05825	0.00262813	0.0908195	1	protein_coding	K02537//mitotic spindle assembly checkpoint protein MAD2	AWP00591.1//Spindle assembly checkpoint protein Mad2 [Scophthalmus maximus]
SMAX5B_017650	CP026254.1	complement(17259676..17262946)	3.6821	-1.61719	-3.06777	0.00431924	0.12389	1	protein_coding	NA	AWP11204.1//putative OCIA domain-containing protein 2 [Scophthalmus maximus]
SMAX5B_012372	CP026247.1	complement(15451919..15456946)	3.50958	-1.61938	-3.07242	0.00131959	0.0585658	1	protein_coding	K01313//coagulation factor II (thrombin) [EC:3.4.21.5];K01321//coagulation factor IX (Christmas factor) [EC:3.4.21.22]	XP_035483895.1//transmembrane gamma-carboxyglutamic acid protein 4 [Scophthalmus maximus]
SMAX5B_003751	CP026244.1	3732316..3733822	32.5255	-1.61938	-3.07243	0.000512957	0.0303233	1	protein_coding	K08770//ubiquitin C	KAF0029181.1//hypothetical protein F2P81_018286 [Scophthalmus maximus]
SMAX5B_017657	CP026254.1	complement(18721887..18728090)	50.7458	-1.62045	-3.0747	5.87813e-06	0.00110316	0.10158	protein_coding	K05607//methylglutaconyl-CoA hydratase [EC:4.2.1.18]	XP_035503162.1//enoyl-CoA hydratase domain-containing protein 2, mitochondrial [Scophthalmus maximus]
SMAX5B_010034	CP026252.1	complement(9475308..9482252)	5.22569	-1.62447	-3.08329	0.000515851	0.0303233	1	protein_coding	K01265//methionyl aminopeptidase [EC:3.4.11.18]	AWP08208.1//Methionine aminopeptidase 2 [Scophthalmus maximus]
SMAX5B_005495	CP026244.1	13253944..13256851	16.5618	-1.62559	-3.08568	2.2313e-06	0.00050539	0.0385591	protein_coding	K00251//3-oxo-5-beta-steroid 4-dehydrogenase [EC:1.3.1.3]	XP_035470042.1//aldo-keto reductase family 1 member D1-like [Scophthalmus maximus]
SMAX5B_018233	CP026256.1	4101064..4106300	2.12846	-1.62718	-3.08908	0.00227926	0.0820345	1	protein_coding	K08447//receptor activity modifying protein 1	XP_035506978.1//receptor activity-modifying protein 1-like isoform X1 [Scophthalmus maximus]
SMAX5B_007600	CP026250.1	complement(14188153..14192110)	6.45008	-1.63684	-3.10985	9.38301e-05	0.00913071	1	protein_coding	NA	AWP05847.1//Hypothetical protein SMAX5B_007600 [Scophthalmus maximus]
SMAX5B_017839	CP026252.1	20928996..21007423	4.58719	-1.64587	-3.12937	0.00643143	0.154178	1	protein_coding	K04534//guanine nucleotide-binding protein G(o) subunit alpha	XP_035498647.1//guanine nucleotide-binding protein G(o) subunit alpha isoform X1 [Scophthalmus maximus];XP_012718411.1//guanine nucleotide binding protein (G protein), alpha activating activity polypeptide O, a isoform X1 [Fundulus heteroclitus];XP_029379773.1//guanine nucleotide-binding protein G(o) subunit alpha isoform X2 [Echeneis naucrates]
SMAX5B_005965	CP026249.1	complement(5780709..5800329)	0.641434	-1.65348	-3.14591	0.00426142	0.122768	1	protein_coding	K22453//trefoil factor 2	XP_035491555.1//MAM and LDL-receptor class A domain-containing protein 1 [Scophthalmus maximus]
SMAX5B_005714	CP026251.1	complement(924683..931486)	2.76068	-1.65363	-3.14625	0.00131784	0.0585658	1	protein_coding	K05656//ATP-binding cassette, subfamily B (MDR/TAP), member 9	XP_035495727.1//ATP-binding cassette sub-family B member 9 isoform X2 [Scophthalmus maximus]
SMAX5B_018937	CP026255.1	18616975..18641165	1.7053	-1.68072	-3.20588	0.00687284	0.160656	1	protein_coding	K12494//PH and SEC7 domain-containing protein	AWP12463.1//putative PH and SEC7 domain-containing protein 2 [Scophthalmus maximus]
SMAX5B_007526	CP026250.1	complement(14156781..14158162)	3.10481	-1.69375	-3.23495	0.0047682	0.131086	1	protein_coding	K07844//RASD family, member 2	XP_035493163.1//GTP-binding protein Rhes-like [Scophthalmus maximus]
SMAX5B_007789	CP026244.1	18538169..18549187	2.74836	-1.69444	-3.23652	0.00664015	0.156469	1	protein_coding	K17352//tetraspanin-11	XP_035460384.1//tetraspanin-11 isoform X1 [Scophthalmus maximus]
SMAX5B_004845	CP026246.1	complement(19374216..19378249)	4.26672	-1.69682	-3.24185	0.00174234	0.0686372	1	protein_coding	K20478//golgin subfamily B member 1	XP_035480185.1//trichohyalin-like isoform X1 [Scophthalmus maximus]
SMAX5B_004537	CP026245.1	complement(9941598..9947261)	129.008	-1.70875	-3.26877	2.33182e-09	1.61227e-06	4.02962e-05	protein_coding	K03327//multidrug resistance protein, MATE family	XP_035536427.1//multidrug and toxin extrusion protein 1 [Morone saxatilis]
SMAX5B_017647	CP026254.1	complement(18996339..19004328)	3.87361	-1.73046	-3.31835	0.000298293	0.0212501	1	protein_coding	K06521//semaphorin 4	XP_035503077.1//signal-transducing adaptor protein 1-like isoform X1 [Scophthalmus maximus]
SMAX5B_020405	CP026260.1	complement(10092417..10108517)	27.5747	-1.73179	-3.32141	0.00523675	0.13686	1	protein_coding	K01283//peptidyl-dipeptidase A [EC:3.4.15.1]	AWP17473.1//Angiotensin-converting enzyme [Scophthalmus maximus]
SMAX5B_013291	CP026245.1	complement(12888101..12891459)	22.1493	-1.73246	-3.32293	0.00526085	0.137127	1	protein_coding	K13363//FXYD domain-containing ion transport regulator 6;K01538//sodium/potassium-transporting ATPase subunit gamma (FXYD domain-containing ion transport regulator 2)	AWO98995.1//FXYD domain-containing ion transport regulator 12 [Scophthalmus maximus]
SMAX5B_017960	CP026257.1	complement(7200652..7211433)	4.26737	-1.73329	-3.32485	0.00363109	0.111101	1	protein_coding	K06532//prominin 1	AWP14029.1//putative prominin-1-A-like [Scophthalmus maximus]
SMAX5B_020646	CP026260.1	18191488..18193307	19.6908	-1.73512	-3.32908	2.85028e-06	0.000613837	0.0492556	protein_coding	K08052//neurofibromin 1;K15717//prostamide/prostaglandin F2alpha synthase [EC:1.11.1.20]	AWP18027.1//AhpC-TSA 2 domain containing protein [Scophthalmus maximus]
SMAX5B_008433	CP026245.1	3947163..4067269	1.48094	-1.74504	-3.35205	0.00456236	0.128544	1	protein_coding	K05011//chloride channel 2	XP_035478276.1//chloride channel protein 2c isoform X4 [Scophthalmus maximus]
SMAX5B_009729	CP026252.1	13964297..13970946	4.65271	-1.7468	-3.35613	0.000441736	0.0266196	1	protein_coding	K06460//CD9 antigen	XP_035499038.1//CD9 molecule a isoform X3 [Scophthalmus maximus]
SMAX5B_001575	CP026250.1	complement(20848677..20853039)	117.137	-1.75153	-3.36716	3.2264e-08	1.51376e-05	0.000557554	protein_coding	K01047//secretory phospholipase A2 [EC:3.1.1.4]	AWP06278.1//Group XIIB secretory phospholipase A2-like protein [Scophthalmus maximus]
SMAX5B_005277	CP026258.1	19881947..19898992	6.98247	-1.75573	-3.37698	0.000145822	0.0125207	1	protein_coding	K10370//tropomodulin	XP_035464610.1//tropomodulin-4 [Scophthalmus maximus]
SMAX5B_016726	CP026244.1	complement(19843336..19844049)	17.4907	-1.75724	-3.3805	3.4641e-05	0.00429319	0.598631	protein_coding	K02184//formin 2	AWO98157.1//putative bcl-2-like protein 13-like [Scophthalmus maximus]
SMAX5B_008520	CP026257.1	complement(19533059..19561752)	0.941301	-1.76329	-3.39471	0.00123004	0.0559135	1	protein_coding	K10402//kinesin family member 20	AWP14614.1//Kinesin-like protein [Scophthalmus maximus]
SMAX5B_014882	CP026253.1	complement(16710322..16717433)	2.13497	-1.76482	-3.39833	0.00617652	0.152235	1	protein_coding	K01025//sulfotransferase [EC:2.8.2.-]	AWP09890.1//Sulfotransferase [Scophthalmus maximus]
SMAX5B_011541	CP026250.1	complement(4904575..4909744)	2.73019	-1.77737	-3.428	0.0023233	0.0833913	1	protein_coding	K06631//polo-like kinase 1 [EC:2.7.11.21]	XP_035492659.1//serine/threonine-protein kinase PLK1 isoform X1 [Scophthalmus maximus]
SMAX5B_002332	CP026248.1	complement(11192048..11237998)	1.95358	-1.78122	-3.43716	0.00706552	0.163387	1	protein_coding	K06840//semaphorin 3	XP_035486196.1//semaphorin-3F-like isoform X2 [Scophthalmus maximus]
SMAX5B_005307	CP026258.1	20667554..20672223	148.003	-1.78157	-3.43801	9.52577e-09	5.44087e-06	0.000164615	protein_coding	K06510//CD83 antigen	XP_035463520.1//CD83 antigen [Scophthalmus maximus]
SMAX5B_005947	CP026261.1	complement(5363170..5368302)	1.50079	-1.7914	-3.4615	0.00304032	0.0998913	1	protein_coding	K00510//heme oxygenase 1 [EC:1.14.14.18]	AWP18498.1//putative FAD-dependent oxidoreductase domain-containing protein 2 [Scophthalmus maximus]
SMAX5B_020390	CP026260.1	8567117..8578730	3.07417	-1.79824	-3.47796	0.00378705	0.114107	1	protein_coding	K12320//heat-stable enterotoxin receptor [EC:4.6.1.2]	AWP17362.1//putative heat-stable enterotoxin receptor-like [Scophthalmus maximus]
SMAX5B_015485	CP026249.1	145025..147861	61.4659	-1.79843	-3.47842	0.000273173	0.0201611	1	protein_coding	K12800//NACHT, LRR and PYD domains-containing protein 3;K23573//dentin sialophosphoprotein	XP_035485068.2//chitin synthase 1 [Scophthalmus maximus]
SMAX5B_021683	CP026256.1	complement(2398638..2417177)	39.1073	-1.80125	-3.48523	1.88946e-05	0.00269803	0.326518	protein_coding	K00864//glycerol kinase [EC:2.7.1.30]	XP_035459643.1//glycerol kinase-like isoform X2 [Scophthalmus maximus]
SMAX5B_009767	CP026252.1	11990964..11995275	13.1356	-1.8134	-3.5147	0.00919369	0.189615	1	protein_coding	K23620//protein AMBP;K03909//tissue factor pathway inhibitor	AWP08418.1//putative inter-alpha-trypsin inhibitor-like [Scophthalmus maximus]
SMAX5B_004241	CP026246.1	11801629..11823004	0.902099	-1.81464	-3.51773	0.00935744	0.189705	1	protein_coding	K23794	AWP00102.1//putative pleckstrin -likey-like domain family B member 2 [Scophthalmus maximus]
SMAX5B_013358	CP026245.1	11676924..11690817	2.53502	-1.81687	-3.52315	0.000342755	0.0227432	1	protein_coding	K06675//structural maintenance of chromosome 4	XP_018557706.1//structural maintenance of chromosomes protein 4 isoform X3 [Lates calcarifer]
SMAX5B_008861	CP026255.1	13745638..13749245	29.6905	-1.81719	-3.52395	5.92311e-05	0.00648432	1	protein_coding	K09203//early growth response protein 1	XP_022607739.1//early growth response protein 1 [Seriola dumerili]
SMAX5B_009615	CP026264.1	11041993..11079002	1.55517	-1.82006	-3.53095	0.00481238	0.131136	1	protein_coding	K17551//neurabin	XP_035476151.1//neurabin-1 isoform X4 [Scophthalmus maximus]
SMAX5B_002106	CP026243.1	complement(185177..222994)	0.85553	-1.83775	-3.57452	0.00512693	0.135246	1	protein_coding	K19017//interphotoreceptor matrix proteoglycan 2	AWO95491.1//putative interphotoreceptor matrix proteoglycan 2-like [Scophthalmus maximus]
SMAX5B_012241	CP026246.1	complement(647810..649807)	37.6925	-1.843	-3.58755	7.29018e-06	0.00131193	0.125982	protein_coding	K09228//KRAB domain-containing zinc finger protein	AWO99602.1//putative early growth response protein 1-like [Scophthalmus maximus]
SMAX5B_000398	CP026259.1	10677269..10683805	5.96992	-1.85082	-3.60706	7.65774e-05	0.00785935	1	protein_coding	K14283//transforming acidic coiled-coil-containing protein 3	AWP16508.1//putative transforming acidic coiled-coil-containing protein 3 [Scophthalmus maximus]
SMAX5B_012081	CP026243.1	23379888..23386504	8.17693	-1.85688	-3.62225	1.35961e-05	0.00212633	0.234954	protein_coding	K19657//nephrocystin-1	XP_035490506.1//protein MAL2 [Scophthalmus maximus]
SMAX5B_022448	CP026254.1	complement(5071803..5079495)	6.76217	-1.86063	-3.63167	1.02536e-06	0.000299337	0.0177192	protein_coding	K04994//mucolipin 3	AWP10638.1//putative mucolipin-3-like isoform 4 [Scophthalmus maximus]
SMAX5B_012128	CP026243.1	complement(16463407..16464894)	311.871	-1.86878	-3.65224	6.88178e-08	2.82518e-05	0.00118924	protein_coding	K08760//apolipoprotein A-IV	AWO96304.1//putative apolipoprotein A-I-like [Scophthalmus maximus]
SMAX5B_011951	CP026243.1	complement(23247150..23304527)	0.812418	-1.86937	-3.65374	0.00958823	0.1926	1	protein_coding	K20493//leucine-rich repeat-containing protein 16	XP_035019799.1//F-actin-uncapping protein LRRC16A-like isoform X2 [Hippoglossus stenolepis]
SMAX5B_011424	CP026250.1	6811434..6821153	2.06818	-1.86943	-3.65389	0.000580434	0.0330093	1	protein_coding	K23714	AWP05416.1//putative SH3 domain-containing protein 19 [Scophthalmus maximus]
SMAX5B_003284	CP026253.1	complement(9156567..9165128)	15.0767	-1.876	-3.67056	0.000395296	0.024905	1	protein_coding	K13303//serum/glucocorticoid-regulated kinase 2 [EC:2.7.11.1]	AWP09435.1//Serine/threonine-protein kinase Sgk2 [Scophthalmus maximus]
SMAX5B_004584	CP026245.1	9937032..9941564	2.76745	-1.87602	-3.67062	0.00475095	0.131086	1	protein_coding	K03327//multidrug resistance protein, MATE family	XP_035479336.1//multidrug and toxin extrusion protein 1-like [Scophthalmus maximus]
SMAX5B_008949	CP026259.1	complement(1634170..1637790)	3.51502	-1.88657	-3.69754	0.00260391	0.0907362	1	protein_coding	K21752//Dr1-associated corepressor	AWP15993.1//putative dr1-associated corepressor-like [Scophthalmus maximus]
SMAX5B_011865	CP026243.1	19637503..19639892	28.9787	-1.88816	-3.70162	2.95758e-08	1.43903e-05	0.0005111	protein_coding	K04573//neurofilament medium polypeptide (neurofilament 3)	AWO96600.1//putative neurofilament medium polypeptide-like [Scophthalmus maximus]
SMAX5B_003578	CP026258.1	complement(7936892..7943111)	6.72308	-1.89968	-3.7313	4.86084e-05	0.00550491	0.840002	protein_coding	K01081//5'-nucleotidase [EC:3.1.3.5]	XP_035464243.1//5'-nucleotidase, cytosolic II, like 1 isoform X2 [Scophthalmus maximus]
SMAX5B_015318	CP026246.1	complement(281010..281447)	12.5413	-1.90343	-3.74102	0.00158453	0.0646892	1	protein_coding	K11254//histone H4	XP_014905937.1//transcriptional regulatory protein AlgP-like [Poecilia latipinna]
SMAX5B_003230	CP026247.1	26233592..26240852	3.28358	-1.91428	-3.76926	0.000815165	0.0410482	1	protein_coding	K06971//uncharacterized protein	AWP02035.1//BtpA domain containing protein isoform 2 [Scophthalmus maximus]
SMAX5B_015260	CP026243.1	2521897..2529757	2.99984	-1.91827	-3.7797	0.00273175	0.0929714	1	protein_coding	K05080//growth hormone receptor;K05081//prolactin receptor	XP_035485806.1//growth hormone receptor-like [Scophthalmus maximus]
SMAX5B_000079	CP026262.1	complement(17741332..17746644)	11.4568	-1.93558	-3.82533	1.74786e-05	0.00257996	0.302048	protein_coding	K16600//tubulin polyglutamylase TTLL2 [EC:6.-.-.-];K23573//dentin sialophosphoprotein;K22016//mucin-3/17	AWP20367.1//putative protein unc-93 -like A-like [Scophthalmus maximus]
SMAX5B_010277	CP026251.1	21128883..21136884	5.19821	-1.93653	-3.82783	0.00797751	0.173533	1	protein_coding	K17612//calcineurin B homologous protein 3	AWP07555.1//putative calcineurin B -likeous protein 3-like [Scophthalmus maximus]
SMAX5B_007527	CP026250.1	11679878..11712173	1.16701	-1.93663	-3.8281	0.00503219	0.134093	1	protein_coding	K04515//calcium/calmodulin-dependent protein kinase (CaM kinase) II [EC:2.7.11.17]	XP_035494298.1//calcium/calmodulin-dependent protein kinase type II delta 2 chain isoform X7 [Scophthalmus maximus]
SMAX5B_019676	CP026262.1	13827660..13842631	52.8842	-1.94551	-3.85174	3.42936e-07	0.000112629	0.00592628	protein_coding	K14462//apolipoprotein B	AWP20153.1//putative apolipoprotein B-100-like [Scophthalmus maximus]
SMAX5B_018551	CP026256.1	complement(13131167..13178458)	2.8131	-1.94816	-3.85883	7.1583e-05	0.00764381	1	protein_coding	K17477//FERM, RhoGEF and pleckstrin domain-containing protein 1	XP_035460164.1//FERM, ARHGEF and pleckstrin domain-containing protein 1-like isoform X2 [Scophthalmus maximus]
SMAX5B_000237	CP026251.1	complement(21779524..21782129)	13.1998	-1.95159	-3.86799	7.90277e-05	0.00798606	1	protein_coding	K01024//[heparan sulfate]-glucosamine 3-sulfotransferase 1 [EC:2.8.2.23]	XP_035495194.1//LOW QUALITY PROTEIN: heparan sulfate (glucosamine) 3-O-sulfotransferase 1-like 2 [Scophthalmus maximus]
SMAX5B_018320	CP026256.1	complement(13652478..13664904)	2.11424	-1.95349	-3.87311	0.00628455	0.153458	1	protein_coding	K08285//midline 1 [EC:2.3.2.27]	XP_035507320.1//E3 ubiquitin-protein ligase Midline-1 isoform X1 [Scophthalmus maximus]
SMAX5B_005954	CP026261.1	5604910..5608574	9.07349	-1.95519	-3.87768	0.000136639	0.0120472	1	protein_coding	K15043//importin subunit alpha-1/8	XP_018554129.1//importin subunit alpha-1-like [Lates calcarifer]
SMAX5B_019175	CP026255.1	16885472..16893182	1.35257	-1.95618	-3.88032	0.00491016	0.132182	1	protein_coding	K06267//hyaluronan-mediated motility receptor	AWP12380.1//putative hyaluronan mediated motility receptor-like [Scophthalmus maximus]
SMAX5B_007462	CP026250.1	complement(11582284..11590029)	1.21253	-1.96427	-3.90216	0.00934447	0.189705	1	protein_coding	K08799//maternal embryonic leucine zipper kinase [EC:2.7.11.1]	AWP05656.1//putative maternal embryonic leucine zipper kinase [Scophthalmus maximus]
SMAX5B_001046	CP026254.1	138227..141122	10.3643	-1.97079	-3.91982	0.000368078	0.0237031	1	protein_coding	K16519//A-kinase anchor protein 2	AWP10421.1//putative paralemmin-1 [Scophthalmus maximus]
SMAX5B_016853	CP026257.1	10155598..10169043	4.53813	-2.00201	-4.00558	0.000430253	0.0261677	1	protein_coding	K03853//calpain-2 [EC:3.4.22.53]	AWP14209.1//putative calpain-2 catalytic subunit-like isoform 2 [Scophthalmus maximus]
SMAX5B_017225	CP026255.1	29048..29425	9.96047	-2.00447	-4.01241	0.00773674	0.171107	1	protein_coding	#N/A	AWP11574.1//putative vitamin K-dependent protein C [Scophthalmus maximus]
SMAX5B_009953	CP026252.1	14095144..14111542	8.0466	-2.01207	-4.03362	0.000109001	0.0103271	1	protein_coding	K09656//beta-1,4-N-acetylgalactosaminyltransferase 3 [EC:2.4.1.244];K09657//beta-1,4-N-acetylgalactosaminyltransferase 4 [EC:2.4.1.244]	AWP08530.1//putative N-acetyl-beta-glucosaminyl-glycoprotein 4-beta-N-acetylgalactosaminyltransferase 1-like [Scophthalmus maximus]
SMAX5B_004027	CP026246.1	complement(10217135..10220843)	5.90871	-2.0309	-4.08661	0.000529265	0.0307653	1	protein_coding	K05008//potassium inwardly-rectifying channel subfamily J member 15	XP_035480644.1//ATP-sensitive inward rectifier potassium channel 15 [Scophthalmus maximus]
SMAX5B_015860	CP026264.1	complement(4871129..4874867)	2.31838	-2.0334	-4.09368	0.00775845	0.171299	1	protein_coding	K11514//Borealin	XP_035476867.1//borealin [Scophthalmus maximus]
SMAX5B_008494	CP026257.1	14519850..14522485	11.3535	-2.03623	-4.10172	0.000689846	0.0371006	1	protein_coding	NA	XP_035461862.1//transmembrane protein 229B-like isoform X1 [Scophthalmus maximus]
SMAX5B_021039	CP026261.1	12483401..12484828	2.64916	-2.04447	-4.12523	0.00348459	0.107458	1	protein_coding	K18259//protein amnionless	AWP18990.1//putative protein amnionless [Scophthalmus maximus]
SMAX5B_004815	CP026246.1	18460923..18463930	4.35461	-2.0458	-4.12903	0.000109269	0.0103271	1	protein_coding	K16769//cytoskeleton-associated protein 2	AWP00486.1//putative cytoskeleton-associated protein 2-like [Scophthalmus maximus]
SMAX5B_000205	CP026262.1	18215254..18235357	3.69533	-2.04943	-4.13941	0.000260799	0.0193566	1	protein_coding	K22017//mucin-4;K23573//dentin sialophosphoprotein;K12015//tripartite motif-containing protein 39 [EC:2.3.2.27];K23449//triadin	AWP20403.1//putative neurofilament heavy polypeptide-like [Scophthalmus maximus]
SMAX5B_002376	CP026248.1	complement(13532486..13547124)	0.706999	-2.07059	-4.20059	0.00456923	0.128544	1	protein_coding	K10891//fanconi anemia group D2 protein	AWP02883.1//putative Fanconi anemia group D2 protein [Scophthalmus maximus]
SMAX5B_014459	CP026253.1	complement(21846728..21854350)	1.41576	-2.08175	-4.23321	0.00387418	0.115008	1	protein_coding	K16733//Rac GTPase-activating protein 1	AWP10187.1//putative rac GTPase-activating protein 1 [Scophthalmus maximus]
SMAX5B_013270	CP026256.1	complement(21918800..22107098)	0.0277774	-2.08941	-4.25575	0.00414914	0.120859	1	protein_coding	K12567//titin [EC:2.7.11.1]	XP_014898722.1//titin isoform X8 [Poecilia latipinna]
SMAX5B_009126	CP026259.1	complement(2514506..2537818)	0.53119	-2.08989	-4.25715	0.00865268	0.18275	1	protein_coding	K12484//Rab11 family-interacting protein 1/2/5	AWP16030.1//putative rab11 family-interacting protein 5-like [Scophthalmus maximus]
SMAX5B_014262	CP026248.1	complement(17752621..17771159)	1.61432	-2.0905	-4.25896	0.00191642	0.0736142	1	protein_coding	K10409//dynein intermediate chain 1, axonemal	XP_035487249.1//dynein, axonemal, intermediate chain 1, paralog 2 isoform X2 [Scophthalmus maximus]
SMAX5B_014412	CP026257.1	complement(508616..513302)	3.82829	-2.09504	-4.27239	0.00381073	0.114296	1	protein_coding	K08186//MFS transporter, MCT family, solute carrier family 16 (monocarboxylic acid transporters), member 9	AWP13747.1//putative monocarboxylate transporter 9 [Scophthalmus maximus]
SMAX5B_013342	CP026245.1	complement(16033582..16047039)	1.20491	-2.11423	-4.32958	0.000645953	0.035655	1	protein_coding	K16808//nuclear mitotic apparatus protein 1	AWO99137.1//putative nuclear mitotic apparatus protein 1 [Scophthalmus maximus]
SMAX5B_007747	CP026244.1	17233229..17243266	8.3258	-2.11543	-4.3332	0.000181177	0.0150313	1	protein_coding	K20411//proline-rich protein 5	AWO98057.1//putative proline-rich protein 5-like [Scophthalmus maximus]
SMAX5B_009253	CP026254.1	complement(441592..444542)	2.50543	-2.11644	-4.33621	0.00480389	0.131136	1	protein_coding	K14217//interferon-induced protein with tetratricopeptide repeats 1	AWP10439.1//Interferon-inducible protein 56 [Scophthalmus maximus]
SMAX5B_018397	CP026256.1	complement(15206432..15210296)	61.3741	-2.11696	-4.33779	0.00020966	0.0163947	1	protein_coding	K06468//low affinity immunoglobulin epsilon Fc receptor;K23573//dentin sialophosphoprotein	AWP13314.1//putative serine/threonine-protein kinase kinX-like [Scophthalmus maximus]
SMAX5B_011100	CP026264.1	13526052..13543882	2.39189	-2.12338	-4.35713	2.02073e-06	0.000468558	0.0349202	protein_coding	K18621//actin-binding protein anillin	AWP21892.1//putative actin-binding protein anillin [Scophthalmus maximus]
SMAX5B_000129	CP026262.1	19475438..19486377	1.42046	-2.13757	-4.40022	0.00170376	0.0679969	1	protein_coding	K02178//checkpoint serine/threonine-protein kinase [EC:2.7.11.1]	AWP20474.1//putative mitotic checkpoint serine/threonine-protein kinase BUB1 [Scophthalmus maximus]
SMAX5B_017940	CP026257.1	9143041..9251122	8.80174	-2.14354	-4.41845	9.47995e-08	3.77388e-05	0.00163823	protein_coding	K07377//neurexin	XP_035461644.1//neurexin-1a isoform X1 [Scophthalmus maximus]
SMAX5B_009275	CP026255.1	6653352..6657591	3.06352	-2.15631	-4.45775	0.00155834	0.0640708	1	protein_coding	K11479//aurora kinase B [EC:2.7.11.1]	AWP11789.1//Aurora kinase B [Scophthalmus maximus]
SMAX5B_009291	CP026255.1	8844336..8858020	1.65852	-2.15796	-4.46282	0.00160379	0.0652289	1	protein_coding	K11501//centromere protein I	AWP11881.1//putative centromere protein I [Scophthalmus maximus]
SMAX5B_003183	CP026264.1	complement(651153..660070)	102.56	-2.15971	-4.46825	4.14455e-11	4.94972e-08	7.16219e-07	protein_coding	K05143//tumor necrosis factor receptor superfamily member 6B;K05148//tumor necrosis factor receptor superfamily member 11B	AWP21163.1//putative tumor necrosis factor receptor superfamily member 6B-like [Scophthalmus maximus]
SMAX5B_011806	CP026243.1	complement(16432632..16443007)	101.677	-2.16308	-4.47868	5.88608e-10	5.22878e-07	1.01717e-05	protein_coding	K01312//trypsin [EC:3.4.21.4]	AWO96298.1//putative trypsinogen-like protein 3 [Scophthalmus maximus]
SMAX5B_006194	CP026249.1	10398506..10407156	3.05357	-2.16705	-4.49103	2.54588e-05	0.0033114	0.439953	protein_coding	K10393//kinesin family member 2/24	AWP04104.1//putative kinesin-like protein KIF2C [Scophthalmus maximus]
SMAX5B_010465	CP026251.1	complement(15674473..15675292)	15.0386	-2.18287	-4.54055	2.27782e-05	0.00311588	0.393631	protein_coding	K11275//histone H1/5	XP_035494684.1//protamine-like protein [Scophthalmus maximus]
SMAX5B_005765	CP026249.1	9894776..9898040	3.59222	-2.19067	-4.56517	0.000333905	0.0226109	1	protein_coding	K03363//cell division cycle 20, cofactor of APC complex	AWP04074.1//putative cell division cycle protein 20-like [Scophthalmus maximus]
SMAX5B_017770	CP026257.1	20163691..20166017	39.1555	-2.19444	-4.57714	1.40177e-06	0.000375818	0.024224	protein_coding	K00079//carbonyl reductase 1 [EC:1.1.1.184 1.1.1.189 1.1.1.197]	AWP14653.1//putative carbonyl reductase [Scophthalmus maximus]
SMAX5B_020193	CP026260.1	12230789..12237209	1.27721	-2.20715	-4.61762	0.00209499	0.0770922	1	protein_coding	K11512//centromere protein T	AWP17686.1//putative centromere protein T [Scophthalmus maximus]
SMAX5B_009584	CP026260.1	3316910..3321216	8.86446	-2.22676	-4.6808	3.99821e-05	0.0048848	0.690931	protein_coding	K11253//histone H3;K11495//histone H3-like centromeric protein A	XP_035488527.1//histone H3.3-like [Scophthalmus maximus]
SMAX5B_020116	CP026260.1	complement(10169333..10179940)	4.85183	-2.23645	-4.71235	2.0916e-07	7.63258e-05	0.00361449	protein_coding	K17582//antigen KI-67	AWP17479.1//putative antigen KI-67 [Scophthalmus maximus]
SMAX5B_001187	CP026256.1	complement(19037858..19066560)	0.706335	-2.23973	-4.72307	0.00720109	0.164604	1	protein_coding	K20641//Rho GTPase-activating protein 20	AWP13524.1//putative rho GTPase-activating protein 20-like [Scophthalmus maximus]
SMAX5B_017934	CP026257.1	complement(7642220..7643808)	49.7058	-2.24814	-4.75071	1.78349e-06	0.000438767	0.0308205	protein_coding	K23573//dentin sialophosphoprotein	AWP14068.1//Hypothetical protein SMAX5B_017934 [Scophthalmus maximus]
SMAX5B_000289	CP026259.1	complement(10415843..10421842)	0.668194	-2.2515	-4.76176	0.00826459	0.177116	1	protein_coding	K04574//neurofilament heavy polypeptide;K10779//transcriptional regulator ATRX [EC:3.6.4.12]	AWP16481.1//putative mis18-binding protein 1 isoform 2 [Scophthalmus maximus]
SMAX5B_003715	CP026258.1	complement(7844676..7851600)	28.0606	-2.25481	-4.77271	4.69116e-08	2.1251e-05	0.00081068	protein_coding	K14158//solute carrier family 5 (sodium/glucose cotransporter), member 1	XP_035463993.1//sodium/glucose cotransporter 1 [Scophthalmus maximus]
SMAX5B_019531	CP026253.1	complement(23468011..23473128)	2.18733	-2.26067	-4.79213	0.00293468	0.0981125	1	protein_coding	K04011//complement component (3b/4b) receptor 1	AWP10291.1//putative complement receptor type 1-like [Scophthalmus maximus]
SMAX5B_015824	CP026264.1	3869725..3880416	1.32867	-2.26574	-4.80902	0.000812775	0.0410482	1	protein_coding	K06732//CUB domain-containing protein 1	AWP21385.1//putative CUB domain-containing protein 1-like [Scophthalmus maximus]
SMAX5B_010797	CP026251.1	11721777..11727976	4.47003	-2.27844	-4.85153	0.000526123	0.0307186	1	protein_coding	K09511//DnaJ homolog subfamily B member 5	XP_023269280.1//dnaJ homolog subfamily B member 5 [Seriola lalandi dorsalis]
SMAX5B_010337	CP026251.1	complement(17240917..17242036)	133.532	-2.28777	-4.883	2.37201e-12	4.45158e-09	4.09906e-08	protein_coding	K08750//fatty acid-binding protein 1, liver	XP_035496657.1//fatty acid-binding protein, liver-type-like [Scophthalmus maximus]
SMAX5B_000492	CP026259.1	12958350..12962262	2.88255	-2.29192	-4.89708	0.000342784	0.0227432	1	protein_coding	K06637//mitotic checkpoint serine/threonine-protein kinase BUB1 beta [EC:2.7.11.1]	XP_035466496.1//mitotic checkpoint serine/threonine-protein kinase BUB1 beta [Scophthalmus maximus]
SMAX5B_011430	CP026250.1	complement(6780406..6794966)	0.77616	-2.29361	-4.90283	0.0091093	0.18935	1	protein_coding	K10955//mucin-2;K13172//serine/arginine repetitive matrix protein 2	AWP05415.1//putative protein FAM160A1 [Scophthalmus maximus]
SMAX5B_011794	CP026243.1	complement(19634454..19636777)	11.3367	-2.30278	-4.93408	2.03281e-06	0.000468558	0.035129	protein_coding	NA	XP_035477451.1//translation initiation factor IF-2 [Scophthalmus maximus]
SMAX5B_020939	CP026261.1	complement(12116766..12133243)	1.02315	-2.30974	-4.95792	0.00363656	0.111101	1	protein_coding	K00967//ethanolamine-phosphate cytidylyltransferase [EC:2.7.7.14]	AWP18966.1//putative ethanolamine-phosphate cytidylyltransferase-like [Scophthalmus maximus]
SMAX5B_014809	CP026253.1	9996618..10009400	0.964138	-2.31262	-4.96783	0.00544999	0.140617	1	protein_coding	K16464//centrosomal protein CEP250;K20283//golgin subfamily A member 4;K18626//trichohyalin	AWP09482.1//putative coiled-coil domain-containing protein 30 [Scophthalmus maximus]
SMAX5B_004568	CP026245.1	9931003..9936789	7.21687	-2.33727	-5.05344	2.53003e-06	0.00055395	0.0437214	protein_coding	K03327//multidrug resistance protein, MATE family	AWO98808.1//putative multidrug and toxin extrusion protein 1-like [Scophthalmus maximus]
SMAX5B_008483	CP026257.1	complement(15909247..15928316)	2.29376	-2.38322	-5.217	0.00119541	0.0545992	1	protein_coding	K09187//[histone H3]-lysine4 N-trimethyltransferase MLL2 [EC:2.1.1.354];K20479//WASP homolog-associated protein with actin, membranes and microtubules;K22030//leiomodin;K14959//[histone H3]-lysine4 N-trimethyltransferase MLL4 [EC:2.1.1.354]	AWP14455.1//putative shootin-1 [Scophthalmus maximus]
SMAX5B_002022	CP026250.1	complement(17930880..17934550)	5.13319	-2.38654	-5.22901	9.04352e-05	0.00900035	1	protein_coding	K00857//thymidine kinase [EC:2.7.1.21]	XP_035494357.1//thymidine kinase, cytosolic [Scophthalmus maximus]
SMAX5B_006032	CP026249.1	13435677..13443358	2.47127	-2.42248	-5.36091	0.000666984	0.0365091	1	protein_coding	K06088//occludin	AWP04310.1//putative occludin-like [Scophthalmus maximus]
SMAX5B_017310	CP026260.1	13572772..13582631	1.92419	-2.45684	-5.49014	0.00373316	0.113524	1	protein_coding	K23167//synaptic vesicle membrane protein VAT-1	XP_035468140.1//synaptic vesicle membrane protein VAT-1 homolog [Scophthalmus maximus]
SMAX5B_014162	CP026248.1	complement(20690649..20692217)	3.06264	-2.46537	-5.52268	0.000714886	0.0380221	1	protein_coding	K09036//transcription factor MAFB	AWP03339.1//putative transcription factor MafB-like [Scophthalmus maximus]
SMAX5B_012793	CP026252.1	complement(18383765..18400872)	0.959293	-2.46575	-5.52415	0.00615194	0.151914	1	protein_coding	K21877//harmonin	AWP08747.1//putative harmonin-like [Scophthalmus maximus]
SMAX5B_009545	CP026251.1	4746447..4763676	1.59298	-2.4691	-5.53699	0.00298373	0.0988872	1	protein_coding	K06676//condensin complex subunit 2	AWP06640.1//putative condensin complex subunit 2 [Scophthalmus maximus]
SMAX5B_020303	CP026260.1	11867074..11890772	0.618739	-2.47423	-5.55672	0.0084172	0.178927	1	protein_coding	K10955//mucin-2;K22017//mucin-4;K06551//signal-regulatory protein alpha/beta1/gamma;K21125//mucin-5AC;K23573//dentin sialophosphoprotein;K18626//trichohyalin	AWP17636.1//putative microtubule-associated protein futsch-like [Scophthalmus maximus]
SMAX5B_017725	CP026257.1	complement(19816716..19826315)	2.25856	-2.48578	-5.60139	0.000311314	0.0215207	1	protein_coding	K10398//kinesin family member 11	XP_035461623.1//kinesin-like protein KIF11 [Scophthalmus maximus]
SMAX5B_010091	CP026252.1	complement(15620182..15624149)	1.02929	-2.50082	-5.66009	0.00837673	0.178355	1	protein_coding	K10873//DNA repair and recombination protein RAD52	AWP08618.1//putative DNA repair protein RAD52 -like [Scophthalmus maximus]
SMAX5B_001589	CP026250.1	18370172..18372137	1.6912	-2.50195	-5.6645	0.00785125	0.172651	1	protein_coding	NA	AWP06153.1//putative inositol 1-4-5-trisphosphate receptor-interacting protein-like [Scophthalmus maximus]
SMAX5B_020083	CP026260.1	complement(10349124..10361570)	1.30601	-2.51276	-5.7071	0.000223551	0.0170078	1	protein_coding	K03164//DNA topoisomerase II [EC:5.6.2.2]	XP_035528140.1//DNA topoisomerase 2-alpha isoform X1 [Morone saxatilis]
SMAX5B_010266	CP026256.1	complement(21385688..21392371)	0.597498	-2.52725	-5.76472	0.00613072	0.151675	1	protein_coding	K11581//shugoshin-like 2	AWP13646.1//putative shugoshin-like 2 isoform 2 [Scophthalmus maximus]
SMAX5B_018561	CP026256.1	complement(15511671..15516590)	4.9346	-2.53365	-5.79035	1.87198e-05	0.00269803	0.323497	protein_coding	K22017//mucin-4;K21125//mucin-5AC	AWP13338.1//DUF4592 domain containing protein [Scophthalmus maximus]
SMAX5B_007797	CP026244.1	complement(19446319..19451659)	0.760495	-2.53784	-5.80719	0.00591075	0.148019	1	protein_coding	K11158//retinoid isomerohydrolase / lutein isomerase [EC:3.1.1.64 5.3.3.22]	AWO98130.1//putative DEP domain-containing protein 4 [Scophthalmus maximus]
SMAX5B_009943	CP026252.1	complement(11113546..11133133)	1.60484	-2.53966	-5.81453	1.1643e-05	0.00191193	0.201203	protein_coding	K13878//bestrophin-1;K22078//protein-glucosylgalactosylhydroxylysine glucosidase [EC:3.2.1.107];K11515//inner centromere protein	AWP08343.1//putative acid trehalase-like protein 1 [Scophthalmus maximus]
SMAX5B_014963	CP026253.1	11533601..11542203	5.51775	-2.54356	-5.83027	6.32296e-07	0.000193174	0.0109267	protein_coding	K17277//epidermal growth factor receptor kinase substrate 8	AWP09555.1//putative epidermal growth factor receptor kinase substrate 8-like protein 3 [Scophthalmus maximus]
SMAX5B_000485	CP026259.1	complement(10646118..10676606)	0.573028	-2.54395	-5.83182	0.000192773	0.0155739	1	protein_coding	K10400//kinesin family member 15	AWP16507.1//putative kinesin-like protein KIF15 [Scophthalmus maximus]
SMAX5B_008184	CP026262.1	complement(10433064..10449755)	25.6576	-2.54582	-5.8394	4.26075e-13	9.32892e-10	7.36301e-09	protein_coding	K05871//focal adhesion kinase 2 [EC:2.7.10.2]	AWP19961.1//putative protein-tyrosine kinase 2-beta [Scophthalmus maximus]
SMAX5B_000702	CP026245.1	complement(20570133..20572506)	9.98552	-2.54615	-5.84074	0.00589341	0.148019	1	protein_coding	K08741//DNA mismatch repair protein MSH5;K06467//CD22 antigen;K23573//dentin sialophosphoprotein;K06855//mitogen-activated protein kinase 4/6 [EC:2.7.11.24]	AWO99348.1//putative splicing regulatory glutamine/lysine-rich protein 1-like [Scophthalmus maximus]
SMAX5B_004905	CP026250.1	25631915..25713259	2.81612	-2.57212	-5.94681	0.00365093	0.111281	1	protein_coding	K05449//vascular endothelial growth factor C/D	AWP06441.1//putative vascular endothelial growth factor C, partial [Scophthalmus maximus]
SMAX5B_007108	CP026244.1	complement(2463419..2466274)	61.7809	-2.58335	-5.9933	2.67177e-09	1.73989e-06	4.61708e-05	protein_coding	NA	XP_035465006.1//liver-expressed antimicrobial peptide 2 [Scophthalmus maximus]
SMAX5B_014836	CP026253.1	18472797..18488684	0.491236	-2.59804	-6.05461	0.00849523	0.180294	1	protein_coding	K06550//L1 cell adhesion molecule	XP_035501879.1//neural cell adhesion molecule L1.1-like [Scophthalmus maximus]
SMAX5B_012942	CP026246.1	complement(28226213..28228838)	1.11796	-2.59823	-6.05544	0.00811683	0.175669	1	protein_coding	K12015//tripartite motif-containing protein 39 [EC:2.3.2.27]	XP_035481636.1//E3 ubiquitin-protein ligase TRIM39 isoform X1 [Scophthalmus maximus]
SMAX5B_014540	CP026253.1	20061369..20062808	2.61661	-2.62089	-6.15129	0.00130803	0.0584477	1	protein_coding	K04270//P2Y purinoceptor 1	XP_035501926.1//P2Y purinoceptor 1-like [Scophthalmus maximus]
SMAX5B_004223	CP026246.1	11695670..11699714	7.142	-2.63778	-6.22375	0.000293243	0.021073	1	protein_coding	NA	AWP00094.1//Transmembrane protein 45B [Scophthalmus maximus]
SMAX5B_014710	CP026253.1	15977259..15987314	2.73396	-2.6783	-6.40099	0.00340678	0.106054	1	protein_coding	K14704//solute carrier family 26 (sulfate anion transporter), member 6	AWP09824.1//putative solute carrier family 26 member 6-like [Scophthalmus maximus]
SMAX5B_021344	CP026249.1	complement(26118510..26123314)	15.6678	-2.69354	-6.46898	0.000136335	0.0120472	1	protein_coding	K20356//anterior gradient protein 2	AWP04953.1//putative anterior gradient protein 2 -like [Scophthalmus maximus]
SMAX5B_001892	CP026250.1	complement(18653095..18661187)	1.65167	-2.71417	-6.56216	0.000591729	0.0335067	1	protein_coding	K21988//transmembrane channel-like protein	AWP06174.1//putative transmembrane channel-like protein 5 [Scophthalmus maximus]
SMAX5B_001718	CP026263.1	complement(12456173..12495340)	0.53166	-2.73166	-6.6422	0.00445648	0.12672	1	protein_coding	K08834//myosin III [EC:2.7.11.1]	AWP21046.1//Myosin IIIA [Scophthalmus maximus]
SMAX5B_010825	CP026251.1	5715026..5716129	1.89955	-2.76546	-6.79963	0.00545286	0.140617	1	protein_coding	K04204//neuropeptide Y receptor type 1	XP_035496976.1//neuropeptide Y receptor Y8b [Scophthalmus maximus]
SMAX5B_006801	CP026246.1	complement(6518276..6525469)	3.59555	-2.76934	-6.81798	0.00407195	0.119139	1	protein_coding	K22413//fibroblast growth factor 11/12/13/14	XP_005355761.1//fibroblast growth factor 14 isoform X1 [Microtus ochrogaster]
SMAX5B_006697	CP026261.1	6031041..6034771	4.08614	-2.77798	-6.85891	3.69121e-06	0.000746021	0.0637877	protein_coding	K19926//zona pellucida sperm-binding protein 1	AWP18550.1//putative zona pellucida sperm-binding protein 4-like [Scophthalmus maximus]
SMAX5B_016971	CP026246.1	22992284..23012838	7.8252	-2.78151	-6.87572	4.69816e-06	0.000913986	0.081189	protein_coding	K13885//scavenger receptor class B, member 1	XP_035481197.1//scavenger receptor class B member 1 isoform X2 [Scophthalmus maximus]
SMAX5B_000432	CP026259.1	complement(10397888..10403870)	2.09707	-2.78683	-6.9011	0.000100802	0.00966598	1	protein_coding	K04712//sphingolipid 4-desaturase/C4-monooxygenase [EC:1.14.19.17 1.14.18.5]	XP_018539449.1//sphingolipid delta(4)-desaturase/C4-monooxygenase DES2-like [Lates calcarifer]
SMAX5B_007464	CP026250.1	complement(12453142..12461234)	1.86405	-2.7894	-6.91344	1.28757e-05	0.00206278	0.222505	protein_coding	K06674//structural maintenance of chromosome 2	AWP05709.1//putative structural maintenance of chromosomes protein 2 [Scophthalmus maximus]
SMAX5B_009304	CP026255.1	6586751..6595268	1.98236	-2.7911	-6.92157	0.00475786	0.131086	1	protein_coding	K06485//integrin alpha 6	AWP11780.1//putative integrin alpha-6-like [Scophthalmus maximus]
SMAX5B_014182	CP026248.1	complement(17637809..17677473)	0.598411	-2.8176	-7.04987	1.61437e-05	0.0024377	0.278979	protein_coding	K16308//citron Rho-interacting kinase [EC:2.7.11.1];K10351//myosin regulatory light chain 2	AWP03180.1//putative citron Rho-interacting kinase-like isoform 2 [Scophthalmus maximus]
SMAX5B_020087	CP026260.1	complement(9722963..9728357)	1.67298	-2.82204	-7.0716	0.00788591	0.172662	1	protein_coding	K08731//baculoviral IAP repeat-containing protein 5	AWP17449.1//putative baculoviral IAP repeat-containing protein 5-like isoform 2 [Scophthalmus maximus]
SMAX5B_006215	CP026261.1	7049070..7061508	3.84988	-2.83095	-7.11543	0.00180012	0.0697584	1	protein_coding	K23645//BAI1-associated protein 2-like protein 2	AWP18640.1//putative brain-specific angiogenesis inhibitor 1-associated protein 2-like protein 2 [Scophthalmus maximus]
SMAX5B_003838	CP026252.1	complement(294624..297533)	18.0224	-2.83336	-7.12734	0.000427846	0.0261424	1	protein_coding	K08770//ubiquitin C;K02927//large subunit ribosomal protein L40e;K04610//metabotropic glutamate receptor 8	XP_035499042.1//uncharacterized protein LOC118315681 isoform X1 [Scophthalmus maximus]
SMAX5B_008592	CP026257.1	18093868..18103746	1.63094	-2.86241	-7.27227	0.00244186	0.0860021	1	protein_coding	K08146//MFS transporter, SP family, solute carrier family 2 (facilitated glucose transporter), member 9	AWP14555.1//putative solute carrier family 2 facilitated glucose transporter member 9-like [Scophthalmus maximus]
SMAX5B_004213	CP026246.1	12013725..12021222	1.87818	-2.88091	-7.36613	7.29501e-05	0.00764381	1	protein_coding	K10402//kinesin family member 20	XP_035482287.1//kinesin-like protein KIF20A [Scophthalmus maximus]
SMAX5B_019069	CP026255.1	complement(15684717..15689981)	6.9979	-2.89768	-7.45226	0.00237494	0.0845517	1	protein_coding	K13864//solute carrier family 7 (cationic amino acid transporter), member 2	XP_035506374.1//cationic amino acid transporter 2-like [Scophthalmus maximus]
SMAX5B_011557	CP026250.1	9582784..9584343	29.4381	-2.93774	-7.66209	2.9922e-05	0.00377967	0.517083	protein_coding	K08751//fatty acid-binding protein 2, intestinal	KAF0037356.1//fatty acid-binding protein 2, intestinal [Scophthalmus maximus]
SMAX5B_016331	CP026249.1	complement(23052338..23054591)	2.85595	-2.95016	-7.72836	0.00204546	0.0759072	1	protein_coding	K23573//dentin sialophosphoprotein	AWP04824.1//putative proteoglycan 4-like [Scophthalmus maximus]
SMAX5B_020051	CP026261.1	complement(20106912..20120164)	8.53691	-2.95082	-7.73189	0.000212451	0.0165146	1	protein_coding	K08664//prostasin [EC:3.4.21.-];K09628//serine protease 27 [EC:3.4.21.-]	AWP19505.1//putative protein FAM57B-like [Scophthalmus maximus]
SMAX5B_013593	CP026248.1	complement(6293115..6305311)	2.06552	-2.9787	-7.88276	0.000223974	0.0170078	1	protein_coding	K10387//plakophilin 1	AWP02445.1//putative plakophilin-1-like [Scophthalmus maximus]
SMAX5B_014043	CP026248.1	14340885..14354971	0.532873	-2.98269	-7.90457	0.000370722	0.0237569	1	protein_coding	K02365//separase [EC:3.4.22.49]	AWP02957.1//putative separin [Scophthalmus maximus]
SMAX5B_018936	CP026255.1	4053263..4056342	4.04093	-2.9833	-7.90795	0.000778904	0.0399705	1	protein_coding	K06627//cyclin-A	AWP11704.1//putative cyclin-A2 [Scophthalmus maximus]
SMAX5B_020173	CP026260.1	8735088..8736311	1.96717	-2.98708	-7.92869	0.00654781	0.155584	1	protein_coding	K15216//RNA polymerase I-specific transcription initiation factor RRN3	XP_035468639.1//transmembrane protein 238-like [Scophthalmus maximus]
SMAX5B_005560	CP026248.1	5156823..5160375	4.69085	-3.04131	-8.23241	2.74082e-05	0.00353002	0.473641	protein_coding	K06688//ubiquitin-conjugating enzyme E2 C [EC:2.3.2.23]	AWP02392.1//putative ubiquitin-conjugating enzyme E2 C isoform 2 [Scophthalmus maximus]
SMAX5B_022270	CP026254.1	14354894..14374441	1.22147	-3.06042	-8.34218	0.000353554	0.0231212	1	protein_coding	K23697	XP_035504110.1//src homology 2 domain containing transforming protein D, b isoform X2 [Scophthalmus maximus]
SMAX5B_018710	CP026244.1	complement(23107519..23120811)	1.25534	-3.08812	-8.50389	0.000728408	0.0382803	1	protein_coding	K17886//nuclear protein MDM1;K10532//heparan-alpha-glucosaminide N-acetyltransferase [EC:2.3.1.78]	AWO98325.1//putative nuclear protein MDM1-like [Scophthalmus maximus]
SMAX5B_006791	CP026246.1	complement(6449727..6451814)	0.960746	-3.11001	-8.6339	0.00545896	0.140617	1	protein_coding	K04142//adrenergic receptor beta-2	XP_035482950.1//beta-2 adrenergic receptor-like [Scophthalmus maximus]
SMAX5B_000329	CP026259.1	12383843..12386501	6.31042	-3.11823	-8.6832	9.11782e-10	7.4863e-07	1.57565e-05	protein_coding	K10104//ficolin;K05466//angiopoietin 2	AWP16636.1//putative fibrinogen-like protein 1 [Scophthalmus maximus]
SMAX5B_008177	CP026262.1	complement(4121132..4134598)	8.90151	-3.12467	-8.72209	0.00056249	0.0322683	1	protein_coding	K01395//meprin A [EC:3.4.24.18]	AWP19665.1//putative meprin A subunit alpha-like [Scophthalmus maximus]
SMAX5B_003115	CP026264.1	complement(1291140..1295406)	1.77469	-3.13066	-8.75834	0.00476968	0.131086	1	protein_coding	K10955//mucin-2;K10950//ERO1-like protein alpha [EC:1.8.4.-]	AWP21210.1//putative bcl-2/adenovirus E1B 19 kDa-interacting protein 2-like protein [Scophthalmus maximus]
SMAX5B_010547	CP026244.1	20606751..20611728	1.01929	-3.20353	-9.21212	0.0015141	0.063018	1	protein_coding	K09406//forkhead box protein M	XP_035503642.1//forkhead box protein M1 isoform X1 [Scophthalmus maximus]
SMAX5B_020896	CP026261.1	10493365..10524227	1.23592	-3.23629	-9.4237	0.00269447	0.0921803	1	protein_coding	K14391//solute carrier family 5 (sodium/myo-inositol cotransporter), member 11	AWP18870.1//Delphilin [Scophthalmus maximus]
SMAX5B_011690	CP026243.1	complement(19900186..19911555)	0.837623	-3.24053	-9.45144	0.00207613	0.0766125	1	protein_coding	K14947//epithelial splicing regulatory protein 1/2	AWO96629.1//putative epithelial splicing regulatory protein 1 [Scophthalmus maximus]
SMAX5B_010027	CP026252.1	complement(14986557..14990678)	1.54211	-3.27705	-9.6937	0.00659623	0.155854	1	protein_coding	K04280//gonadotropin-releasing hormone receptor;K20281//GRIP and coiled-coil domain-containing protein 1	AWP08586.1//putative transmembrane protein 116-like [Scophthalmus maximus]
SMAX5B_005899	CP026249.1	13263654..13265452	147.32	-3.2962	-9.82327	4.55918e-33	5.9894e-29	7.87872e-29	protein_coding	K05504//growth differentiation factor 15	AWP04292.1//Growth differentiation factor 15 [Scophthalmus maximus]
SMAX5B_005617	CP026247.1	5762487..5767612	2.63292	-3.31338	-9.94093	0.00263395	0.0908195	1	protein_coding	K02183//calmodulin	XP_035483842.1//calmodulin-like protein 4a [Scophthalmus maximus]
SMAX5B_010051	CP026252.1	11926142..11941201	1.66447	-3.31474	-9.95031	0.00218371	0.0794666	1	protein_coding	K23088//vitamin A receptor/transporter (stra6) family protein	XP_035497833.1//receptor for retinol uptake stra6 [Scophthalmus maximus]
SMAX5B_017258	CP026260.1	complement(18043615..18049842)	5.8356	-3.3981	-10.5421	0.00570599	0.14471	1	protein_coding	K01897//long-chain acyl-CoA synthetase [EC:6.2.1.3]	AWP18013.1//Long-chain-fatty-acid--CoA ligase 5 isoform 3 [Scophthalmus maximus]
SMAX5B_016450	CP026248.1	904389..905380	10.4415	-3.40028	-10.5581	0.00654928	0.155584	1	protein_coding	NA	XP_035488661.1//guanylin family protein [Scophthalmus maximus]
SMAX5B_005156	CP026248.1	8466456..8470995	1.88543	-3.40321	-10.5796	0.00011274	0.010504	1	protein_coding	K11481//aurora kinase A [EC:2.7.11.1]	AWP02540.1//Serine/threonine-protein kinase 6 isoform 2 [Scophthalmus maximus]
SMAX5B_000238	CP026251.1	21741297..21754674	1.17677	-3.47026	-11.0829	0.000536927	0.0309369	1	protein_coding	K16769//cytoskeleton-associated protein 2	XP_035496707.1//cytoskeleton-associated protein 2-like isoform X1 [Scophthalmus maximus]
SMAX5B_002005	CP026263.1	2024245..2036530	4.51425	-3.48313	-11.1822	2.31819e-05	0.00311588	0.400606	protein_coding	K23026//LIM domain and actin-binding protein 1	AWP20598.1//putative LIM domain and actin-binding protein 1-like [Scophthalmus maximus]
SMAX5B_005218	CP026248.1	8994139..9070065	63.5749	-3.49577	-11.2806	1.14594e-23	7.52711e-20	1.9803e-19	protein_coding	K00637//sterol O-acyltransferase [EC:2.3.1.26];K10396//kinesin family member 5	AWP02561.1//Kinesin-like protein isoform 2 [Scophthalmus maximus]
SMAX5B_018580	CP026256.1	complement(14461906..14466205)	4.24635	-3.50566	-11.3582	0.00126597	0.0569606	1	protein_coding	K13365//Na(+)/H(+) exchange regulatory cofactor NHE-RF1	XP_035507463.1//Na(+)/H(+) exchange regulatory cofactor NHE-RF3 [Scophthalmus maximus]
SMAX5B_006654	CP026261.1	complement(6338946..6350294)	2.53544	-3.52045	-11.4752	0.00029128	0.021073	1	protein_coding	K12320//heat-stable enterotoxin receptor [EC:4.6.1.2]	XP_035470831.1//heat-stable enterotoxin receptor [Scophthalmus maximus]
SMAX5B_012642	CP026247.1	16508028..16524090	1.01523	-3.55418	-11.7466	2.18062e-08	1.14587e-05	0.000376832	protein_coding	K11499//centromere protein F	AWP01751.1//putative centromere protein F [Scophthalmus maximus]
SMAX5B_002600	CP026253.1	complement(3978980..3982010)	42.2256	-3.71969	-13.1747	1.10796e-05	0.00184244	0.191467	protein_coding	K07604//type I keratin, acidic	XP_035500035.1//keratin, type I cytoskeletal 18-like [Scophthalmus maximus]
SMAX5B_020099	CP026260.1	complement(12427122..12427582)	16.5571	-3.79909	-13.92	0.00243727	0.0860021	1	protein_coding	K10955//mucin-2	XP_035469588.1//mucin-13b [Scophthalmus maximus]
SMAX5B_002319	CP026248.1	10302559..10304800	3.74047	-3.91241	-15.0574	0.00149251	0.0626425	1	protein_coding	K22016//mucin-3/17	KAF3690018.1//Mucin-17 [Channa argus]
SMAX5B_019366	CP026246.1	8780121..8786972	3.47936	-3.99897	-15.9886	0.00641939	0.154178	1	protein_coding	K08202//MFS transporter, OCT family, solute carrier family 22 (organic cation transporter), member 4/5	XP_035481961.1//solute carrier family 22 member 4-like [Scophthalmus maximus]
SMAX5B_010326	CP026251.1	complement(17966528..17968421)	5.79643	-4.00743	-16.0826	0.000728482	0.0382803	1	protein_coding	K03985//plasminogen activator, urokinase receptor	AWP07371.1//putative CD59 glycoprotein-like [Scophthalmus maximus]
SMAX5B_000103	CP026262.1	complement(15512676..15523587)	2.48779	-4.06851	-16.7781	0.00716428	0.164604	1	protein_coding	K14621//phospholipase B1, membrane-associated [EC:3.1.1.4 3.1.1.5]	XP_018517168.1//phospholipase B1, membrane-associated-like [Lates calcarifer]
SMAX5B_003884	CP026243.1	1967703..1973077	5.2136	-4.23441	-18.8228	0.00336497	0.105089	1	protein_coding	K05025//chloride intracellular channel protein 5	AWO95610.1//putative chloride intracellular channel protein 5-like [Scophthalmus maximus]
SMAX5B_021331	CP026245.1	complement(459094..482275)	1.34014	-4.25896	-19.1459	0.0045619	0.128544	1	protein_coding	K13365//Na(+)/H(+) exchange regulatory cofactor NHE-RF1;K22526//myocardin;K12653//NLR family member X1;K13358//Na(+)/H(+) exchange regulatory cofactor NHE-RF2	AWO98418.1//putative Na(+)/H(+) exchange regulatory cofactor NHE-RF3-like isoform 2 [Scophthalmus maximus]
SMAX5B_017375	CP026260.1	complement(16522893..16545318)	0.701449	-4.32039	-19.9787	0.00652269	0.155515	1	protein_coding	K21112//synaptopodin	XP_035469347.1//synaptopodin 2-like protein [Scophthalmus maximus]
SMAX5B_017268	CP026260.1	complement(16000027..16002025)	3.274	-4.33877	-20.2349	0.00146031	0.0622861	1	protein_coding	K23841//clarin	AWP17903.1//putative clarin-3 [Scophthalmus maximus]
SMAX5B_012068	CP026243.1	19754665..19768043	1.70291	-4.39362	-21.0189	0.000616196	0.0347014	1	protein_coding	K05658//ATP-binding cassette, subfamily B (MDR/TAP), member 1 [EC:7.6.2.2]	XP_035482908.1//ATP-binding cassette, sub-family B (MDR/TAP), member 4 [Scophthalmus maximus]
SMAX5B_017556	CP026243.1	6020893..6063607	1.77615	-4.45536	-21.9379	6.364e-06	0.00117752	0.109976	protein_coding	K18273//alpha-tectorin	AWO95813.1//putative zonadhesin-like isoform 2 [Scophthalmus maximus]
SMAX5B_009277	CP026255.1	9066288..9087049	1.39166	-4.46432	-22.0747	0.000889907	0.0432989	1	protein_coding	K04389//tumor necrosis factor ligand superfamily member 6;K08455//adhesion G-protein coupled receptor G4	AWP11889.1//putative G-protein coupled receptor 112 [Scophthalmus maximus]
SMAX5B_004112	CP026246.1	13227068..13231802	2.53288	-4.56734	-23.7087	0.00194393	0.0737967	1	protein_coding	K11160//diacylglycerol O-acyltransferase 2 [EC:2.3.1.20 2.3.1.75]	AWP00202.1//putative 2-acylglycerol O-acyltransferase 3 [Scophthalmus maximus]
SMAX5B_003727	CP026243.1	15444843..15446232	2.55161	-4.6238	-24.6549	0.00327499	0.1032	1	protein_coding	K22614//NLR family CARD domain-containing protein 3	AWO96247.1//putative NACHT LRR and PYD domains-containing protein 3-like [Scophthalmus maximus]
SMAX5B_007945	CP026254.1	19723639..19728596	10.149	-4.82103	-28.2666	1.51723e-06	0.000393999	0.0262192	protein_coding	K14683//solute carrier family 34 (sodium-dependent phosphate cotransporter)	AWP11371.1//Na/Pi cotransport system protein [Scophthalmus maximus]
SMAX5B_014101	CP026248.1	complement(20842706..20847594)	1.71887	-4.87679	-29.3806	0.000381056	0.0243006	1	protein_coding	K11985//TRAF-interacting protein [EC:2.3.2.27]	XP_035486912.1//E3 ubiquitin-protein ligase TRAIP [Scophthalmus maximus]
SMAX5B_016451	CP026248.1	907565..909385	4.96976	-4.88326	-29.5125	0.00311187	0.101238	1	protein_coding	NA	XP_035488662.1//guanylin-like [Scophthalmus maximus]
SMAX5B_013351	CP026245.1	16067572..16070327	3.47707	-4.9462	-30.8287	0.00119434	0.0545992	1	protein_coding	K13649//folate receptor	XP_035479537.1//folate receptor [Scophthalmus maximus]
SMAX5B_004705	CP026251.1	complement(24330624..24333073)	22.354	-5.16281	-35.8229	0.000195607	0.0155739	1	protein_coding	K10955//mucin-2	AWP07706.1//putative natterin-3-like [Scophthalmus maximus]
SMAX5B_003394	CP026259.1	15181891..15193016	10.3903	-5.49738	-45.1729	7.34076e-05	0.00764381	1	protein_coding	K13442//calpain-14 [EC:3.4.22.-];K01367//calpain-1 [EC:3.4.22.52]	XP_035465752.1//calpain-1 catalytic subunit-like [Scophthalmus maximus]
SMAX5B_006483	CP026249.1	14860016..14861417	4.78399	-5.51685	-45.7865	0.000307916	0.0214787	1	protein_coding	NA	AWP04448.1//putative leucine-rich repeat-containing protein 19-like [Scophthalmus maximus]
SMAX5B_018232	CP026256.1	complement(5527084..5536778)	1.29767	-5.74457	-53.6151	0.000140311	0.0121392	1	protein_coding	K01229//lactase-phlorizin hydrolase [EC:3.2.1.108 3.2.1.62]	AWP12813.1//putative lactase-phlorizin hydrolase-like [Scophthalmus maximus]
SMAX5B_012575	CP026247.1	16100010..16104690	15.0312	-6.71253	-104.875	0.00809461	0.175477	1	protein_coding	K00698//chitin synthase [EC:2.4.1.16]	XP_035485068.2//chitin synthase 1 [Scophthalmus maximus]
SMAX5B_000775	CP026251.1	22247843..22250365	34.6896	-6.86503	-116.569	0.00632804	0.153794	1	protein_coding	K10955//mucin-2;K21125//mucin-5AC	AWP07617.1//putative natterin-3-like [Scophthalmus maximus]
SMAX5B_006946	CP026249.1	complement(25787689..25793371)	19.0646	-7.10589	-137.748	0.00472211	0.130874	1	protein_coding	K05334//solute carrier family 6 (neurotransmitter transporter) member 19	XP_026156499.1//sodium-dependent neutral amino acid transporter B(0)AT1-like [Mastacembelus armatus]
SMAX5B_003875	CP026243.1	complement(2305532..2308962)	27.8733	-7.11471	-138.593	0.00488742	0.131921	1	protein_coding	K23009//carboxypeptidase O [EC:3.4.17.-]	XP_035487791.1//carboxypeptidase O-like [Scophthalmus maximus]
SMAX5B_006293	CP026249.1	8556724..8563663	16.0777	-7.11749	-138.861	0.00489042	0.131921	1	protein_coding	K08606//meprin B [EC:3.4.24.63]	AWP04004.1//putative meprin A subunit beta [Scophthalmus maximus]
SMAX5B_012609	CP026247.1	16088662..16097556	3.74676	-7.2129	-148.354	0.00610549	0.151335	1	protein_coding	K00698//chitin synthase [EC:2.4.1.16]	XP_035485068.2//chitin synthase 1 [Scophthalmus maximus]
SMAX5B_002145	CP026243.1	166636..176697	1.9661	-7.24557	-151.752	0.005762	0.145849	1	protein_coding	K08464//adhesion G-protein coupled receptor G7	AWO95490.1//putative G-protein coupled receptor 128-like [Scophthalmus maximus]
SMAX5B_020876	CP026261.1	complement(8218362..8223899)	4.50355	-7.27396	-154.768	0.0066461	0.156469	1	protein_coding	K21894//cytoglobin	XP_035470953.1//cytoglobin-1-like isoform X1 [Scophthalmus maximus]
SMAX5B_005895	CP026249.1	12159017..12172158	2.06375	-7.36691	-165.067	0.00509703	0.134728	1	protein_coding	K08397//relaxin family peptide receptor 3	AWP04225.1//putative relaxin-3 receptor 1-like [Scophthalmus maximus]
SMAX5B_005204	CP026248.1	8615941..8629961	18.0011	-7.6382	-199.217	0.00322192	0.102238	1	protein_coding	K03948//NADH dehydrogenase (ubiquinone) 1 alpha subcomplex subunit 4	XP_035486445.1//cytochrome c oxidase subunit NDUFA4 [Scophthalmus maximus]
SMAX5B_009274	CP026255.1	complement(6920679..6928666)	5.73137	-7.69065	-206.593	0.00263278	0.0908195	1	protein_coding	K17479//glutaredoxin domain-containing cysteine-rich protein 1	XP_035506753.1//glutaredoxin domain-containing cysteine-rich protein 1 isoform X3 [Scophthalmus maximus]
SMAX5B_005769	CP026249.1	complement(11229266..11230608)	6.06208	-7.72652	-211.794	0.00316014	0.101238	1	protein_coding	K23284//C1q-related factor	AWP04151.1//putative complement C1q-like protein 4 [Scophthalmus maximus]
SMAX5B_008427	CP026245.1	complement(4111173..4125418)	5.77024	-8.17593	-289.201	0.00151585	0.063018	1	protein_coding	K01077//alkaline phosphatase [EC:3.1.3.1]	XP_035477568.1//alkaline phosphatase, tissue-nonspecific isozyme [Scophthalmus maximus]
SMAX5B_003897	CP026243.1	1101169..1108858	82.2645	-8.25205	-304.87	2.73845e-14	7.19501e-11	4.73232e-10	protein_coding	K14206//solute carrier family 15 (oligopeptide transporter), member 1	AWO95554.1//Oligopeptide transporter [Scophthalmus maximus]
SMAX5B_020213	CP026260.1	12259860..12288421	0.829706	-8.35531	-327.49	0.00148706	0.0626425	1	protein_coding	K18273//alpha-tectorin	AWP17688.1//Alpha-tectorin [Scophthalmus maximus]
SMAX5B_021536	CP026246.1	complement(3191639..3198376)	3.34594	-8.3601	-328.579	0.00132419	0.058572	1	protein_coding	K01316//enterokinase [EC:3.4.21.9]	AWO99724.1//putative enteropeptidase-like [Scophthalmus maximus]
SMAX5B_022440	CP026254.1	complement(9637353..9655218)	4.34404	-8.84024	-458.329	0.000753803	0.0391412	1	protein_coding	K01077//alkaline phosphatase [EC:3.1.3.1];K21411//ankyrin repeat and LEM domain-containing protein 1	AWP10826.1//Alkaline phosphatase [Scophthalmus maximus]
SMAX5B_013935	CP026258.1	16019409..16020923	30.5284	-9.21988	-596.293	0.000332939	0.0226109	1	protein_coding	K08758//apolipoprotein A-II	AWP15625.1//putative type-4 ice-structuring protein LS-12-like [Scophthalmus maximus]
SMAX5B_007051	CP026248.1	complement(26686111..26696111)	12.0578	-9.90843	-961.022	0.000188917	0.0155113	1	protein_coding	K01183//chitinase [EC:3.2.1.14]	AWP03519.1//putative acidic mammalian chitinase-like [Scophthalmus maximus]
SMAX5B_007053	CP026248.1	complement(26703587..26710455)	32.849	-10.6639	-1622.38	6.28172e-05	0.00682007	1	protein_coding	K06760//contactin 2;K01183//chitinase [EC:3.2.1.14]	AWP03520.1//Glyco hydro 18 multi-domain protein [Scophthalmus maximus]
SMAX5B_015407	CP026252.1	complement(23686147..23696213)	114.852	-10.8556	-1852.92	3.01029e-15	9.88655e-12	5.20208e-11	protein_coding	K11140//aminopeptidase N [EC:3.4.11.2]	XP_034444576.1//aminopeptidase N-like [Hippoglossus hippoglossus]
SMAX5B_012399	CP026247.1	complement(7886683..7895218)	41.166	-11.842	-3671.1	6.94673e-06	0.00126749	0.120046	protein_coding	K09708//angiotensin-converting enzyme 2 [EC:3.4.17.23]	XP_035484042.1//angiotensin-converting enzyme 2 [Scophthalmus maximus]
SMAX5B_009430	CP026255.1	7223640..7238695	196.919	-13.2817	-9958.07	1.25126e-06	0.000342454	0.021623	protein_coding	K06560//mannose receptor, C type;K22244//regenerating islet-derived protein 4;K06502//CD69 antigen;K17513//C-type lectin superfamily 17 member A	AWP11809.1//putative ladderlectin-like [Scophthalmus maximus]
