# Supplementary material for: Unravelling turbot (Scophthalmus maximus) resistance to Aeromonas salmonicida: transcriptomic insights from two full-sibling families with divergent susceptibility
Source: Front Immunol. 2024 Dec 6;15:1522666. doi: 10.3389/fimmu.2024.1522666 (PMC11659141; doi:10.3389/fimmu.2024.1522666)
Supplement: Supplementary File S4 — Differentially expressed genes (DEGs) in the susceptible family at 24 hpi with A. salmonicida in the head kidney and liver. [file Table4.xlsx]

## Sheet: S_Bac vs S_C HK
Name	Chromosome	Region	Max group mean	Log₂ fold change	Fold change	P-value	FDR p-value	Bonferroni	Biotype	Kegg Orthology	Nr Description
SMAX5B_002496	CP026255.1	complement(11846546..11848138)	565.711	8.31889	319.326	3.35717e-43	5.61352e-40	6.37023e-39	protein_coding	K15049//endonuclease domain-containing 1 protein	AWP12038.1//putative endonuclease domain-containing 1 protein-like [Scophthalmus maximus]
SMAX5B_006463	CP026249.1	5953082..5956878	3.70291	7.25351	152.589	0.0095303	0.0894757	1	protein_coding	K12665//cytochrome P450 family 26 subfamily C;K05262//pituitary adenylate cyclase-activating polypeptide	AWP03847.1//Pituitary adenylate cyclase-activating peptide isoform 2 [Scophthalmus maximus];CDQ76308.1//unnamed protein product [Oncorhynchus mykiss];CDQ95684.1//unnamed protein product, partial [Oncorhynchus mykiss];XP_035491266.1//adenylate cyclase activating polypeptide 1b isoform X1 [Scophthalmus maximus];XP_001562668.2//conserved hypothetical protein [Leishmania braziliensis MHOM/BR/75/M2904]
SMAX5B_007487	CP026250.1	complement(15988898..15996462)	51.6488	7.19708	146.736	4.02816e-38	3.74194e-35	7.64344e-34	protein_coding	K06716//ADP-ribosyltransferase 1 [EC:2.4.2.31];K06717//ADP-ribosyltransferase 4 [EC:2.4.2.31];K15043//importin subunit alpha-1/8	AWP05939.1//Importin subunit alpha [Scophthalmus maximus];KAF0037624.1//hypothetical protein F2P81_010498 [Scophthalmus maximus]
SMAX5B_014363	CP026248.1	15469935..15471661	46.5018	6.83614	114.257	1.21074e-11	1.39619e-09	2.29738e-07	protein_coding	K05443//interleukin 10	XP_035488440.1//interleukin-10 [Scophthalmus maximus]
SMAX5B_019336	CP026251.1	complement(23183529..23186265)	3639.76	6.17268	72.1377	2.40207e-57	2.00825e-53	4.55793e-53	protein_coding	K05512//C-C motif chemokine 19	XP_035496792.1//C-C motif chemokine 19-like [Scophthalmus maximus]
SMAX5B_019642	CP026262.1	10864284..10877438	5.57883	5.67164	50.9721	2.72322e-08	1.77179e-06	0.000516732	protein_coding	K04908//potassium voltage-gated channel Eag-related subfamily H member 5	AWP20001.1//putative potassium voltage-gated channel subfamily H member 5-like [Scophthalmus maximus]
SMAX5B_022065	CP026251.1	12333654..12340418	164.265	5.403	42.3121	1.3164e-48	3.66858e-45	2.49787e-44	protein_coding	K12671//C-X-C motif chemokine 10	XP_035496848.1//uncharacterized protein cxcl11.5 [Scophthalmus maximus];XP_035496612.1//protein FAM151B [Scophthalmus maximus]
SMAX5B_000493	CP026259.1	complement(8391388..8394864)	591.404	5.17331	36.0847	3.06047e-52	1.02348e-48	5.80724e-48	protein_coding	K01365//cathepsin L [EC:3.4.22.15]	AWP16377.1//Cathepsin L [Scophthalmus maximus]
SMAX5B_006147	CP026261.1	complement(4887105..4890503)	226.375	5.08337	33.9037	8.87854e-58	1.48458e-53	1.6847e-53	protein_coding	K01446//peptidoglycan recognition protein	XP_035471023.1//peptidoglycan recognition protein 6 [Scophthalmus maximus]
SMAX5B_012004	CP026243.1	complement(23306758..23309603)	405.723	4.98319	31.6293	2.12837e-41	2.54203e-38	4.03858e-37	protein_coding	K05143//tumor necrosis factor receptor superfamily member 6B	AWO96889.1//putative tumor necrosis factor receptor superfamily member 11B-like [Scophthalmus maximus]
SMAX5B_018370	CP026256.1	complement(16514851..16517838)	77.9491	4.89597	29.7738	3.83513e-38	3.74194e-35	7.27716e-34	protein_coding	K17724//aconitate decarboxylase [EC:4.1.1.6]	XP_035507351.1//cis-aconitate decarboxylase isoform X1 [Scophthalmus maximus]
SMAX5B_010492	CP026251.1	complement(17371333..17380027)	1090.28	4.83065	28.4558	2.28992e-44	5.46995e-41	4.34512e-40	protein_coding	K01307//gamma-glutamyl hydrolase [EC:3.4.19.9];K10524//nicotinamide/nicotinate riboside kinase [EC:2.7.1.22 2.7.1.173]	XP_035495548.1//gamma-glutamyl hydrolase [Scophthalmus maximus];AWP07345.1//putative gamma-glutamyl hydrolase-like [Scophthalmus maximus];XP_035495550.1//nicotinamide riboside kinase 1 [Scophthalmus maximus]
SMAX5B_022001	CP026259.1	6243390..6247266	57.7946	4.78321	27.5352	1.77315e-37	1.48244e-34	3.36456e-33	protein_coding	K05059//ciliary neurotrophic factor receptor;K05056//interleukin 11 receptor alpha	XP_034715035.1//interleukin-27 subunit beta [Etheostoma cragini];AWP16285.1//putative interleukin-27 subunit beta [Scophthalmus maximus]
SMAX5B_005899	CP026249.1	13263654..13265452	2.88599	4.74299	26.7782	0.0016558	0.0244151	1	protein_coding	K05504//growth differentiation factor 15	AWP04292.1//Growth differentiation factor 15 [Scophthalmus maximus]
SMAX5B_004416	CP026244.1	928862..934068	188.77	4.71937	26.3433	7.85277e-21	2.91792e-18	1.49006e-16	protein_coding	K03334//L-amino-acid oxidase [EC:1.4.3.2]	AWO97275.1//skin mucus antibacterial l-amino acid oxidase-like [Scophthalmus maximus];XP_035462908.1//L-amino-acid oxidase-like isoform X1 [Scophthalmus maximus]
SMAX5B_012890	CP026246.1	28632830..28640059	95.0923	4.56186	23.6187	2.31719e-41	2.58305e-38	4.39688e-37	protein_coding	K11853//ubiquitin carboxyl-terminal hydrolase 34 [EC:3.4.19.12];K09034//ATF-like basic leucine zipper transcriptional factor;K04855//voltage-dependent calcium channel T type alpha-1H;K05746//enabled;K07943//ADP-ribosylation factor-like protein 2	XP_020374805.1//flocculation protein FLO11-like, partial [Rhincodon typus];XP_035480232.1//transcription factor kayak [Scophthalmus maximus]
SMAX5B_019163	CP026255.1	complement(6039061..6041853)	96.3112	4.49947	22.6191	4.38139e-25	2.15474e-22	8.31369e-21	protein_coding	K11517//(S)-2-hydroxy-acid oxidase [EC:1.1.3.15];K00477//phytanoyl-CoA hydroxylase [EC:1.14.11.18]	XP_035506164.1//probable alpha-ketoglutarate-dependent hypophosphite dioxygenase [Scophthalmus maximus]
SMAX5B_011414	CP026250.1	complement(3956191..3958919)	374.356	4.35846	20.513	4.56308e-42	6.93629e-39	8.65844e-38	protein_coding	K06769//intercellular adhesion molecule 5;K06523//intercellular adhesion molecule 2;K06527//vascular cell adhesion molecule 1	XP_035492247.1//hemicentin-1-like [Scophthalmus maximus]
SMAX5B_010056	CP026252.1	14794984..14796186	5.42649	4.29602	19.644	0.00195658	0.0279624	1	protein_coding	NA	AWP08568.1//Leptin a [Scophthalmus maximus]
SMAX5B_001823	CP026263.1	complement(1300956..1314598)	0.974916	4.11527	17.3309	0.00738136	0.0748931	1	protein_coding	K04964//transient receptor potential cation channel subfamily C member 1	AWP20569.1//Transient receptor potential cation channel subfamily c member 1 [Scophthalmus maximus]
SMAX5B_009658	CP026264.1	11523898..11530007	0.971959	4.0496	16.5597	0.00569558	0.0618013	1	protein_coding	K12741//heterogeneous nuclear ribonucleoprotein A1/A3;K17265//Ras GTPase-activating protein-binding protein 1 [EC:3.6.4.12 3.6.4.13]	XP_035476633.1//deleted in azoospermia-like isoform X1 [Scophthalmus maximus]
SMAX5B_015449	CP026252.1	complement(22469412..22473981)	7.51955	4.04878	16.5502	2.54653e-08	1.6764e-06	0.000483203	protein_coding	K08826//homeodomain interacting protein kinase [EC:2.7.11.1]	AWP08930.1//putative homeodomain-interacting protein kinase 2-like [Scophthalmus maximus]
SMAX5B_019067	CP026255.1	complement(6032072..6036030)	29.4205	4.03392	16.3807	6.28637e-16	1.43992e-13	1.19284e-11	protein_coding	NA	XP_035506163.1//uncharacterized protein si:ch211-153b23.4 [Scophthalmus maximus]
SMAX5B_000015	CP026262.1	complement(16768897..16772376)	62.9065	4.00269	16.0299	9.60095e-11	9.5558e-09	1.82178e-06	protein_coding	K10168//toll-like receptor 5	ANS71058.1//tlr5-a [Scophthalmus maximus]
SMAX5B_005307	CP026258.1	20667554..20672223	202.125	3.96204	15.5845	9.02286e-42	1.25726e-38	1.71209e-37	protein_coding	K06510//CD83 antigen	XP_035463520.1//CD83 antigen [Scophthalmus maximus]
SMAX5B_003183	CP026264.1	complement(651153..660070)	168.966	3.92766	15.2175	1.50652e-43	3.10212e-40	2.85862e-39	protein_coding	K05143//tumor necrosis factor receptor superfamily member 6B;K05148//tumor necrosis factor receptor superfamily member 11B	AWP21163.1//putative tumor necrosis factor receptor superfamily member 6B-like [Scophthalmus maximus]
SMAX5B_003669	CP026258.1	7495654..7502920	109.884	3.90642	14.9951	3.05244e-52	1.02348e-48	5.792e-48	protein_coding	K06745//programmed cell death 1 ligand 1	XP_035464659.1//butyrophilin subfamily 2 member A2-like [Scophthalmus maximus];AWP15144.1//putative programmed cell death 1 ligand 1-like [Scophthalmus maximus]
SMAX5B_008414	CP026245.1	complement(3676138..3678811)	77.4773	3.89911	14.9193	3.3693e-18	9.38968e-16	6.39325e-14	protein_coding	K09228//KRAB domain-containing zinc finger protein	KAF0030260.1//hypothetical protein F2P81_016991 [Scophthalmus maximus];XP_035478271.1//LOW QUALITY PROTEIN: XIAP-associated factor 1 [Scophthalmus maximus];AWO98521.1//putative XIAP-associated factor 1 [Scophthalmus maximus]
SMAX5B_003720	CP026243.1	15493145..15495749	254.604	3.79899	13.919	4.61339e-16	1.0714e-13	8.75391e-12	protein_coding	K23106//hepcidin	CAJ34592.1//hepcidin 1 precursor [Scophthalmus maximus];XP_035496795.1//hepcidin-1 [Scophthalmus maximus];AWO96254.1//hamp1 HAMP [Scophthalmus maximus]
SMAX5B_000242	CP026251.1	21737621..21740400	70.0232	3.73217	13.2891	8.06856e-24	3.64634e-21	1.53101e-19	protein_coding	K04519//interleukin 1 beta	XP_035496710.1//interleukin-1 beta-like [Scophthalmus maximus]
SMAX5B_004700	CP026251.1	24396762..24399694	12.4365	3.71911	13.1693	1.56169e-10	1.46703e-08	2.96331e-06	protein_coding	K18626//trichohyalin	XP_034721147.1//GTPase IMAP family member 4-like, partial [Etheostoma cragini];AWP07716.1//putative GTPase IMAP family member 4-like [Scophthalmus maximus]
SMAX5B_010848	CP026251.1	complement(9451502..9452167)	4.35194	3.69213	12.9253	0.00165129	0.02437	1	protein_coding	#N/A	#N/A
SMAX5B_020872	CP026261.1	12316001..12316618	160.105	3.68576	12.8684	3.82721e-32	2.66645e-29	7.26212e-28	protein_coding	K04696//suppressor of cytokine signaling 3	XP_035471944.1//suppressor of cytokine signaling 3a [Scophthalmus maximus]
SMAX5B_005988	CP026249.1	complement(12441759..12449224)	437.73	3.67232	12.7491	4.98378e-38	4.38599e-35	9.45672e-34	protein_coding	K16062//C-C motif chemokine 21;K21097//C-C motif chemokine 24	ABC69051.1//chemokine CC-like protein, partial [Scophthalmus maximus];XP_035491304.1//uncharacterized protein LOC118311488 [Scophthalmus maximus]
SMAX5B_005346	CP026247.1	2121412..2150816	5.47402	3.66656	12.6983	1.1396e-05	0.000393705	0.21624	protein_coding	K12327//caldesmon	AWP01143.1//putative non-muscle caldesmon-like [Scophthalmus maximus]
SMAX5B_006674	CP026249.1	14614321..14615953	24.4512	3.64847	12.5401	2.37565e-12	3.05564e-10	4.5078e-08	protein_coding	K16449//regulator of G-protein signaling	AWP04419.1//putative regulator of G-protein signaling 5-like [Scophthalmus maximus]
SMAX5B_015489	CP026249.1	complement(133806..142428)	210.882	3.63172	12.3953	1.34252e-22	5.61207e-20	2.54743e-18	protein_coding	K22614//NLR family CARD domain-containing protein 3;K14026//SEL1 protein	AWP03558.1//Hypothetical protein SMAX5B_015489 [Scophthalmus maximus]
SMAX5B_002492	CP026255.1	11879480..11882169	9.07055	3.60099	12.134	6.1091e-08	3.75552e-06	0.0011592	protein_coding	K23482//beta-crystallin	XP_035505401.1//crystallin, beta A1, like 1 [Scophthalmus maximus]
SMAX5B_003787	CP026244.1	3735290..3739007	130.56	3.5997	12.1232	9.79953e-39	1.02411e-35	1.85946e-34	protein_coding	K11842//ubiquitin carboxyl-terminal hydrolase 12/46 [EC:3.4.19.12];K23573//dentin sialophosphoprotein;K11858//ubiquitin carboxyl-terminal hydrolase 48 [EC:3.4.19.12]	AWO97494.1//putative eukaryotic translation initiation factor 5B-like [Scophthalmus maximus];XP_035475317.1//probable ubiquitin carboxyl-terminal hydrolase creB [Scophthalmus maximus]
SMAX5B_020675	CP026262.1	complement(4001407..4002482)	19.8103	3.59736	12.1036	8.37897e-06	0.000302602	0.158991	protein_coding	NA	AWP19656.1//putative sentrin-specific protease 2-like, partial [Scophthalmus maximus]
SMAX5B_012886	CP026246.1	complement(27569581..27577801)	89.4986	3.59054	12.0465	3.81518e-27	2.27834e-24	7.2393e-23	protein_coding	K12797//caspase recruitment domain-containing protein 6	KAF0039095.1//hypothetical protein F2P81_009579 [Scophthalmus maximus]
SMAX5B_017559	CP026243.1	6137773..6142551	104.629	3.56341	11.8221	2.04189e-26	1.13808e-23	3.87449e-22	protein_coding	K03982//plasminogen activator inhibitor 1	XP_035485553.1//plasminogen activator inhibitor 1 [Scophthalmus maximus]
SMAX5B_017431	CP026260.1	complement(16688512..16689388)	366.025	3.55495	11.753	4.989e-55	2.7807e-51	9.46663e-51	protein_coding	K01115//phospholipase D1/2 [EC:3.1.4.4];K06467//CD22 antigen;K04696//suppressor of cytokine signaling 3	XP_035469399.1//suppressor of cytokine signaling 3-like [Scophthalmus maximus];XP_001747719.1//uncharacterized protein MONBRDRAFT_27338 [Monosiga brevicollis MX1];KAF3846398.1//hypothetical protein F7725_003476, partial [Dissostichus mawsoni]
SMAX5B_000634	CP026245.1	complement(21034533..21038555)	14.1075	3.53375	11.5815	6.9298e-07	3.25486e-05	0.0131493	protein_coding	K07994//matrix metalloproteinase-13 (collagenase 3) [EC:3.4.24.-]	XP_035479719.1//collagenase 3 [Scophthalmus maximus]
SMAX5B_001108	CP026256.1	18916864..18921708	153.661	3.4878	11.2185	5.55101e-22	2.20996e-19	1.0533e-17	protein_coding	K04387//interleukin 1 receptor type II	AWP13513.1//putative interleukin-1 receptor type 2-like [Scophthalmus maximus]
SMAX5B_012340	CP026246.1	4642444..4651853	7.16576	3.48459	11.1935	2.6266e-12	3.3022e-10	4.98397e-08	protein_coding	K08797//hormonally upregulated Neu-associated kinase [EC:2.7.11.1]	XP_035480525.1//hormonally up-regulated neu tumor-associated kinase homolog A [Scophthalmus maximus];AWO99755.1//putative hormonally up-regulated neu tumor-associated kinase [Scophthalmus maximus]
SMAX5B_003028	CP026258.1	1901627..1904057	2.10011	3.46625	11.0521	0.00849068	0.0826864	1	protein_coding	K21125//mucin-5AC	XP_026188203.1//mucin-2-like [Mastacembelus armatus]
SMAX5B_003793	CP026244.1	complement(3729681..3732244)	247.229	3.45601	10.9739	1.12647e-26	6.49508e-24	2.13748e-22	protein_coding	K08770//ubiquitin C;K11969//ariadne-2 [EC:2.3.2.31];K11968//ariadne-1 [EC:2.3.2.31]	XP_035475490.1//probable E3 ubiquitin-protein ligase ARI5 [Scophthalmus maximus]
SMAX5B_011760	CP026243.1	20466675..20474788	422.022	3.40392	10.5848	2.30023e-22	9.381e-20	4.36468e-18	protein_coding	K19876//metalloreductase STEAP4 [EC:1.16.1.-]	XP_022621340.1//metalloreductase STEAP4 [Seriola dumerili]
SMAX5B_014194	CP026248.1	14928085..14929615	3.1035	3.40333	10.5805	0.00287437	0.0373115	1	protein_coding	K23579//insulin-like growth factor-binding protein 6	AWP03000.1//putative insulin-like growth factor-binding protein 3 [Scophthalmus maximus]
SMAX5B_015193	CP026258.1	5805114..5809871	2.35994	3.38255	10.4292	0.00508756	0.0569786	1	protein_coding	K04573//neurofilament medium polypeptide (neurofilament 3)	AWP15066.1//putative neurofilament medium polypeptide [Scophthalmus maximus]
SMAX5B_001150	CP026256.1	18979836..18983549	2.15659	3.36776	10.3228	9.75215e-05	0.00245194	1	protein_coding	K18668//ribonuclease ZC3H12 [EC:3.1.-.-]	AWP13521.1//putative ribonuclease ZC3H12C [Scophthalmus maximus]
SMAX5B_015379	CP026252.1	complement(22534693..22575791)	45.8449	3.35976	10.2657	1.6697e-43	3.10212e-40	3.16826e-39	protein_coding	K09228//KRAB domain-containing zinc finger protein;K10614//E3 ubiquitin-protein ligase HERC3 [EC:2.3.2.26];K09234//Wilms tumor protein 1;K10615//E3 ubiquitin-protein ligase HERC4 [EC:2.3.2.26]	AWP08934.1//putative E3 ubiquitin-protein ligase HERC4-like [Scophthalmus maximus];XP_026028578.1//Wilms tumor protein homolog isoform X4 [Astatotilapia calliptera]
SMAX5B_016326	CP026249.1	complement(20998876..21000642)	2.46286	3.27767	9.69791	0.00415071	0.0495036	1	protein_coding	K12006//tripartite motif-containing protein 16	XP_035489234.1//LOW QUALITY PROTEIN: E3 ubiquitin/ISG15 ligase TRIM25-like [Scophthalmus maximus]
SMAX5B_011316	CP026250.1	6317597..6323263	50.9713	3.26698	9.62628	2.55602e-20	8.904e-18	4.85005e-16	protein_coding	K04694//suppressor of cytokine signaling 1	AWP05387.1//putative suppressor of cytokine signaling 1-like [Scophthalmus maximus];AWP05388.1//putative suppressor of cytokine signaling 1-like isoform 2 [Scophthalmus maximus]
SMAX5B_007349	CP026250.1	complement(14432507..14436534)	1166.21	3.26609	9.62036	2.92868e-15	6.3598e-13	5.55717e-11	protein_coding	K01446//peptidoglycan recognition protein	AWP05859.1//G-type lysozyme isoform 6 [Scophthalmus maximus];AWP05855.1//G-type lysozyme isoform 2 [Scophthalmus maximus];AWP05856.1//G-type lysozyme isoform 3 [Scophthalmus maximus];AWP05857.1//G-type lysozyme isoform 4 [Scophthalmus maximus]
SMAX5B_008365	CP026249.1	complement(1052484..1053884)	72.0807	3.25576	9.55169	1.28065e-19	4.11802e-17	2.43003e-15	protein_coding	K12800//NACHT, LRR and PYD domains-containing protein 3;K12015//tripartite motif-containing protein 39 [EC:2.3.2.27]	AWP03605.1//Hypothetical protein SMAX5B_008365 [Scophthalmus maximus]
SMAX5B_018117	CP026258.1	16629544..16636763	246.439	3.20789	9.24	1.09371e-20	3.97564e-18	2.07532e-16	protein_coding	K05653//ATP-binding cassette, subfamily B (MDR/TAP), member 2	AWP15651.1//Transporter-associated with antigen processing 1 [Scophthalmus maximus]
SMAX5B_019856	CP026245.1	7282746..7287943	7.6946	3.19132	9.13448	3.85139e-05	0.00113779	0.730802	protein_coding	K15101//solute carrier family 25 (mitochondrial ornithine transporter) member 2/15;K17286//erythrocyte band 7 integral membrane protein	AWO98696.1//putative erythrocyte band 7 integral membrane protein-like [Scophthalmus maximus]
SMAX5B_001270	CP026252.1	3637268..3638450	269.979	3.15225	8.89039	1.05218e-41	1.35335e-38	1.99652e-37	protein_coding	K12964//C-C motif chemokine 4	XP_035499437.1//monocyte chemotactic protein 1B-like [Scophthalmus maximus]
SMAX5B_010475	CP026251.1	17278235..17280095	2.12051	3.14399	8.83968	0.00215629	0.0299574	1	protein_coding	K04261//prostaglandin E receptor 4	XP_035496505.1//prostaglandin E receptor 4 (subtype EP4) a [Scophthalmus maximus]
SMAX5B_016204	CP026249.1	24399536..24399782	24.9035	3.14217	8.82849	5.39288e-05	0.00150542	1	protein_coding	NA	AWP04864.1//Hypothetical protein SMAX5B_016204 [Scophthalmus maximus]
SMAX5B_019659	CP026262.1	10837967..10848206	134.496	3.08493	8.48507	4.20423e-24	1.95275e-21	7.97752e-20	protein_coding	K01895//acetyl-CoA synthetase [EC:6.2.1.1]	XP_034435483.1//acetyl-coenzyme A synthetase 2-like, mitochondrial [Hippoglossus hippoglossus]
SMAX5B_003969	CP026252.1	21805120..21806179	215.929	3.07935	8.45236	0.00950323	0.0893218	1	protein_coding	K10352//myosin heavy chain	AWP08898.1//putative myosin heavy chain fast skeletal muscle-like, partial [Scophthalmus maximus];KAF0041492.1//hypothetical protein F2P81_007390 [Scophthalmus maximus]
SMAX5B_021004	CP026261.1	complement(14121474..14133793)	6.81078	3.037	8.20781	0.00211409	0.0296012	1	protein_coding	K13208//ELAV like protein 2/3/4	XP_028267392.1//ELAV-like protein 3 isoform X3 [Parambassis ranga];XP_035472389.1//ELAV-like protein 3 isoform X2 [Scophthalmus maximus];TSZ68951.1//ELAV-like protein 3 [Bagarius yarrelli];XP_035472390.1//ELAV-like protein 3 isoform X3 [Scophthalmus maximus];XP_035511702.1//ELAV-like protein 3 [Morone saxatilis];XP_028310800.1//ELAV-like protein 3 isoform X5 [Gouania willdenowi];XP_028310801.1//E…
SMAX5B_019193	CP026255.1	5890968..5893058	1.67871	3.03407	8.19115	0.00869734	0.0840625	1	protein_coding	K23533//leucine-rich repeat and immunoglobulin-like domain-containing nogo receptor-interacting protein	XP_030252754.1//leucine-rich repeat and immunoglobulin-like domain-containing nogo receptor-interacting protein 2 [Sparus aurata]
SMAX5B_000936	CP026247.1	1844447..1845626	2.75782	3.03142	8.17613	0.00866867	0.0838824	1	protein_coding	K05494//interleukin 17F	AFV61509.1//interleukin 17A/F [Scophthalmus maximus]
SMAX5B_003751	CP026244.1	3732316..3733822	251.007	3.01257	8.07002	2.59086e-16	6.18882e-14	4.91615e-12	protein_coding	K08770//ubiquitin C	KAF0029181.1//hypothetical protein F2P81_018286 [Scophthalmus maximus]
SMAX5B_002491	CP026255.1	11340047..11346280	0.899576	2.99794	7.98859	0.00912655	0.086905	1	protein_coding	K16495//protocadherin gamma subfamily A	XP_034036950.1//protocadherin beta-8-like isoform X1 [Thalassophryne amazonica]
SMAX5B_005196	CP026248.1	complement(9178567..9189988)	2.04865	2.98608	7.92318	0.000839551	0.014223	1	protein_coding	K04423//mitogen-activated protein kinase kinase kinase 12 [EC:2.7.11.25]	AWP02576.1//Mitogen-activated protein kinase kinase kinase 12 [Scophthalmus maximus]
SMAX5B_005120	CP026252.1	complement(5469949..5473773)	76.2217	2.97536	7.86453	1.01559e-19	3.32974e-17	1.92708e-15	protein_coding	K10054//probable transcription factor PML;K02357//elongation factor Ts	AWP08017.1//putative three prime repair exonuclease 2-like [Scophthalmus maximus]
SMAX5B_007476	CP026250.1	13389022..13398608	13.7432	2.96748	7.82171	1.44224e-05	0.000482315	0.273666	protein_coding	K16519//A-kinase anchor protein 2	XP_035494211.1//uncharacterized protein LOC118313084 [Scophthalmus maximus];AWP05805.1//putative mitotic interactor and substrate of PLK1 [Scophthalmus maximus]
SMAX5B_009382	CP026255.1	complement(9876063..9878455)	15.4531	2.96679	7.81795	1.50037e-08	1.03668e-06	0.000284695	protein_coding	K09030//fos-like antigen 2	XP_035504969.1//fos-related antigen 1a [Scophthalmus maximus]
SMAX5B_011136	CP026261.1	17740971..17752889	2.43517	2.93385	7.64149	0.0045172	0.0525623	1	protein_coding	K21109//MAGUK p55 subfamily member 4	XP_035470141.1//MAGUK p55 subfamily member 3 isoform X1 [Scophthalmus maximus];AWP19353.1//putative MAGUK p55 subfamily member 3-like [Scophthalmus maximus];XP_014060002.1//PREDICTED: MAGUK p55 subfamily member 3-like isoform X3 [Salmo salar];XP_034449456.1//MAGUK p55 subfamily member 3 isoform X1 [Hippoglossus hippoglossus];XP_035470142.1//MAGUK p55 subfamily member 3 isoform X2 [Scophthalmus ma…
SMAX5B_005870	CP026261.1	7408936..7414649	90.6272	2.90078	7.46831	4.01234e-26	2.1642e-23	7.61341e-22	protein_coding	K08144//MFS transporter, SP family, solute carrier family 2 (facilitated glucose transporter), member 6	XP_035471991.1//solute carrier family 2, facilitated glucose transporter member 6 [Scophthalmus maximus]
SMAX5B_021078	CP026261.1	complement(10009827..10010990)	3664.13	2.8979	7.4534	0.00891831	0.0854573	1	protein_coding	K02183//calmodulin;K05629//atrophin-1 interacting protein 1	XP_035472137.1//parvalbumin beta-like [Scophthalmus maximus]
SMAX5B_015940	CP026264.1	1715930..1720390	451.807	2.87916	7.35723	4.39839e-17	1.14915e-14	8.34595e-13	protein_coding	K08058//TAP binding protein (tapasin)	XP_035038542.1//LOW QUALITY PROTEIN: tapasin-like [Hippoglossus stenolepis];XP_022599889.1//tapasin [Seriola dumerili]
SMAX5B_014974	CP026253.1	14079418..14083689	54.1139	2.87299	7.32583	2.94776e-23	1.29709e-20	5.59337e-19	protein_coding	K03211//ETS translocation variant 6/7	XP_035500685.1//transcription factor ETV7 isoform X2 [Scophthalmus maximus];AWP09747.1//putative transcription factor ETV7 isoform 2 [Scophthalmus maximus];XP_035500684.1//transcription factor ETV7 isoform X1 [Scophthalmus maximus]
SMAX5B_005594	CP026248.1	5354851..5361416	38.0455	2.86184	7.26941	2.46969e-12	3.12847e-10	4.68624e-08	protein_coding	K06474//CD34 antigen	AWP02405.1//putative hematopoietic progenitor cell antigen CD34 [Scophthalmus maximus];XP_035486753.1//uncharacterized protein si:ch211-286o17.1 [Scophthalmus maximus]
SMAX5B_001483	CP026244.1	complement(5476646..5478057)	23.0072	2.86163	7.26835	6.11737e-13	9.13291e-11	1.16077e-08	protein_coding	K22157//E3 ubiquitin-protein ligase RNF183 [EC:2.3.2.31];K11983//E3 ubiquitin-protein ligase RNF182 [EC:2.3.2.27]	XP_035475113.1//uncharacterized protein si:ch73-335l21.2 isoform X1 [Scophthalmus maximus]
SMAX5B_011835	CP026243.1	26523070..26527692	3.24164	2.85873	7.25375	9.75884e-05	0.00245194	1	protein_coding	K00752//hyaluronan synthase [EC:2.4.1.212]	XP_035477743.1//hyaluronan synthase 2 [Scophthalmus maximus]
SMAX5B_019135	CP026255.1	6036147..6038480	1770.96	2.85479	7.23398	1.15651e-10	1.1243e-08	2.19448e-06	protein_coding	NA	AWP11757.1//putative ES1 protein -like mitochondrial-like [Scophthalmus maximus]
SMAX5B_018817	CP026251.1	complement(3557873..3559896)	5.60044	2.85429	7.23147	0.000387546	0.00759566	1	protein_coding	K10223//cholesterol 25-hydroxylase [EC:1.14.99.38]	AWP06589.1//putative cholesterol 25-hydroxylase-like protein [Scophthalmus maximus]
SMAX5B_020895	CP026261.1	complement(13627440..13643150)	206.06	2.83929	7.15667	0.0045483	0.0528139	1	protein_coding	K10352//myosin heavy chain	XP_034047183.1//myosin heavy chain, fast skeletal muscle [Thalassophryne amazonica];BAA92289.1//myosin heavy chain [Seriola dumerili]
SMAX5B_003552	CP026258.1	8588776..8590420	21.5753	2.78828	6.90807	2.16148e-08	1.43993e-06	0.000410141	protein_coding	K05419//leukemia inhibitory factor;K05420//ciliary neurotrophic factor	XP_035464361.1//IL-6 subfamily cytokine M17 isoform X1 [Scophthalmus maximus]
SMAX5B_022528	CP026254.1	complement(14708434..14709693)	1.76796	2.78318	6.88367	0.00736232	0.0748361	1	protein_coding	K10955//mucin-2;K15290//synaptotagmin-1	XP_035504554.1//C2 calcium-dependent domain-containing protein 4C [Scophthalmus maximus]
SMAX5B_011158	CP026261.1	16202882..16208709	221.429	2.77383	6.83919	1.61824e-19	5.1054e-17	3.07061e-15	protein_coding	K13171//serine/arginine repetitive matrix protein 1	AWP19249.1//putative interferon-induced 35 kDa protein [Scophthalmus maximus]
SMAX5B_010105	CP026252.1	complement(9140986..9143760)	6.63536	2.77097	6.82564	0.00475836	0.0543987	1	protein_coding	K10371//troponin I, slow skeletal muscle;K12044//troponin I, cardiac muscle	XP_035497827.1//troponin I4b, tandem duplicate 3 [Scophthalmus maximus]
SMAX5B_012873	CP026246.1	27578573..27581127	3.28204	2.75866	6.76766	0.000340849	0.00687496	1	protein_coding	K19928//zona pellucida sperm-binding protein 3	AWP00847.1//putative zona pellucida sperm-binding protein 3-like isoform 7 [Scophthalmus maximus];AWP00845.1//putative zona pellucida sperm-binding protein 3-like isoform 5 [Scophthalmus maximus];AWP00843.1//putative zona pellucida sperm-binding protein 3-like isoform 3 [Scophthalmus maximus];AWP00844.1//putative zona pellucida sperm-binding protein 3-like isoform 4 [Scophthalmus maximus];AWP0084…
SMAX5B_003788	CP026244.1	3740592..3744542	77.1151	2.75317	6.74196	1.3005e-24	6.21305e-22	2.4677e-20	protein_coding	K11842//ubiquitin carboxyl-terminal hydrolase 12/46 [EC:3.4.19.12];K23573//dentin sialophosphoprotein;K11858//ubiquitin carboxyl-terminal hydrolase 48 [EC:3.4.19.12]	AWO97495.1//putative ubiquitin carboxyl-terminal hydrolase 64E-like [Scophthalmus maximus]
SMAX5B_008845	CP026255.1	13354189..13355466	65.1866	2.75159	6.73458	3.33825e-12	4.05888e-10	6.33434e-08	protein_coding	K12671//C-X-C motif chemokine 10	XP_035506575.1//platelet basic protein-like [Scophthalmus maximus]
SMAX5B_018016	CP026257.1	complement(7595801..7597246)	241.037	2.733	6.64836	8.64864e-20	2.89228e-17	1.64108e-15	protein_coding	K05416//C-X-C motif chemokine 9	XP_035462270.1//growth-regulated alpha protein-like [Scophthalmus maximus]
SMAX5B_021666	CP026256.1	1135230..1142740	167.727	2.73164	6.6421	3.95286e-18	1.08354e-15	7.50056e-14	protein_coding	NA	XP_035460766.1//N-myc-interactor isoform X2 [Scophthalmus maximus]
SMAX5B_002344	CP026248.1	11166087..11168702	20.2528	2.72196	6.59769	1.99494e-07	1.08656e-05	0.0037854	protein_coding	K03159//lymphotoxin beta receptor TNFR superfamily member 3;K03160//tumor necrosis factor receptor superfamily member 5	AWP02668.1//putative tumor necrosis factor receptor superfamily member 3-like [Scophthalmus maximus]
SMAX5B_012171	CP026243.1	complement(16496381..16512253)	76.6872	2.69373	6.46982	1.26367e-25	6.40299e-23	2.39782e-21	protein_coding	K09258//B-cell CLL/lymphoma protein 3;K12614//ATP-dependent RNA helicase DDX6/DHH1 [EC:3.6.4.13]	AWO96308.1//putative B-cell lymphoma 3 protein [Scophthalmus maximus];XP_018527883.1//PREDICTED: probable ATP-dependent RNA helicase ddx6 [Lates calcarifer]
SMAX5B_014245	CP026248.1	complement(19849806..19854705)	12.9717	2.69054	6.45556	1.61887e-07	8.96331e-06	0.00307182	protein_coding	K06845//netrin 4	AWP03286.1//putative netrin-4-like [Scophthalmus maximus];XP_035487329.1//netrin-4 isoform X2 [Scophthalmus maximus];XP_035487328.1//netrin-4 isoform X1 [Scophthalmus maximus]
SMAX5B_020848	CP026261.1	7617947..7618467	60.624	2.68358	6.42447	3.32755e-11	3.56667e-09	6.31403e-07	protein_coding	K04694//suppressor of cytokine signaling 1	XP_022612641.1//suppressor of cytokine signaling 1 [Seriola dumerili];AWP18687.1//putative suppressor of cytokine signaling 1, partial [Scophthalmus maximus]
SMAX5B_014491	CP026253.1	19632279..19653069	180.709	2.67402	6.38207	7.78501e-22	3.02728e-19	1.47721e-17	protein_coding	K23026//LIM domain and actin-binding protein 1;K23573//dentin sialophosphoprotein	XP_003392792.1//putative proteophosphoglycan ppg3 [Leishmania infantum JPCM5];XP_029005334.1//LOW QUALITY PROTEIN: probable GPI-anchored adhesin-like protein PGA55, partial [Betta splendens];AWP10052.1//putative LIM domain and actin-binding protein 1-like [Scophthalmus maximus]
SMAX5B_017928	CP026257.1	7669077..7677504	50.3419	2.67164	6.37152	2.54349e-30	1.70119e-27	4.82628e-26	protein_coding	K06540//disintegrin and metalloproteinase domain-containing protein 8 [EC:3.4.24.-]	AWP14073.1//putative disintegrin and metalloproteinase domain-containing protein 8-like [Scophthalmus maximus];XP_035027769.1//disintegrin and metalloproteinase domain-containing protein 8a [Hippoglossus stenolepis]
SMAX5B_008549	CP026257.1	14804752..14810369	122.749	2.66667	6.3496	7.67776e-21	2.91772e-18	1.45686e-16	protein_coding	K10955//mucin-2	AWP14434.1//putative opioid growth factor receptor-like protein 1 [Scophthalmus maximus]
SMAX5B_002833	CP026262.1	complement(10814172..10818870)	40.9276	2.65043	6.27854	1.45606e-07	8.28119e-06	0.00276286	protein_coding	#N/A	#N/A
SMAX5B_015755	CP026264.1	complement(1681053..1685750)	194.984	2.64874	6.27118	1.02393e-17	2.76146e-15	1.9429e-13	protein_coding	K05654//ATP-binding cassette, subfamily B (MDR/TAP), member 3	XP_019963163.1//PREDICTED: antigen peptide transporter 2-like [Paralichthys olivaceus];AWP21239.1//Transporter-associated with antigen processing 2 isoform 2 [Scophthalmus maximus];XP_023270458.1//antigen peptide transporter 2-like [Seriola lalandi dorsalis]
SMAX5B_022221	CP026254.1	complement(13270594..13340473)	7.94253	2.63567	6.21465	0.000387937	0.00759566	1	protein_coding	K13208//ELAV like protein 2/3/4	AWP10983.1//ELAV-like protein [Scophthalmus maximus];XP_028259353.1//ELAV-like protein 4 isoform X4 [Parambassis ranga];XP_024094468.1//ELAV-like protein 4 isoform X10 [Pongo abelii];XP_028259352.1//ELAV-like protein 4 isoform X3 [Parambassis ranga];XP_015235302.1//PREDICTED: ELAV-like protein 4 isoform X7 [Cyprinodon variegatus];XP_012775557.1//ELAV-like protein 4 isoform X8 [Maylandia zebra];XP…
SMAX5B_009215	CP026254.1	1654418..1670271	18.8338	2.62537	6.17044	1.53768e-07	8.59917e-06	0.00291774	protein_coding	K10138//insulin-like growth factor-binding protein 3	AWP10484.1//Insulin-like growth factor binding protein 3 [Scophthalmus maximus]
SMAX5B_014545	CP026253.1	20582211..20587467	284.47	2.61538	6.12784	1.7792e-27	1.10185e-24	3.37603e-23	protein_coding	K03160//tumor necrosis factor receptor superfamily member 5	AWP10121.1//Tumor necrosis factor receptor superfamily member 5 [Scophthalmus maximus]
SMAX5B_000205	CP026262.1	18215254..18235357	4.55378	2.61015	6.10567	1.16065e-05	0.000399327	0.220234	protein_coding	K22017//mucin-4;K23573//dentin sialophosphoprotein;K12015//tripartite motif-containing protein 39 [EC:2.3.2.27];K23449//triadin	TMS12374.1//Triadin [Larimichthys crocea];XP_035473705.1//uncharacterized protein si:ch211-245h14.1 isoform X2 [Scophthalmus maximus];XP_011896280.1//PREDICTED: mucin-19-like, partial [Cercocebus atys]
SMAX5B_009723	CP026252.1	complement(10012199..10098176)	3.89144	2.60766	6.09515	2.33629e-09	1.80024e-07	4.43311e-05	protein_coding	K06249//reelin [EC:3.4.21.-]	AWP08234.1//putative reelin [Scophthalmus maximus];XP_035498184.1//reelin isoform X1 [Scophthalmus maximus]
SMAX5B_004868	CP026246.1	complement(19028339..19039473)	1.37511	2.60527	6.08504	0.00344534	0.042859	1	protein_coding	K17545//serine/threonine-protein kinase ULK4 [EC:2.7.11.1];K04730//interleukin-1 receptor-associated kinase 1 [EC:2.7.11.1];K23091//kremen protein	XP_035482804.1//WSC domain-containing protein 1 [Scophthalmus maximus]
SMAX5B_012589	CP026247.1	complement(15050925..15116909)	8.61637	2.60265	6.07401	1.00576e-05	0.000352565	0.190843	protein_coding	K09035//transcription factor Maf	AWP01678.1//Transcription factor Maf [Scophthalmus maximus]
SMAX5B_008522	CP026257.1	complement(15429925..15459185)	74.09	2.59258	6.03176	1.86425e-28	1.19893e-25	3.53741e-24	protein_coding	K08816//vaccinia related kinase [EC:2.7.11.1]	XP_035461590.1//serine/threonine-protein kinase VRK2 isoform X3 [Scophthalmus maximus];AWP14440.1//putative serine/threonine-protein kinase VRK2-like [Scophthalmus maximus];AWP14441.1//putative serine/threonine-protein kinase VRK2-like isoform 2 [Scophthalmus maximus]
SMAX5B_010615	CP026244.1	complement(19927041..19931379)	16.1115	2.59092	6.02483	4.83396e-09	3.51429e-07	9.17244e-05	protein_coding	K11846//ubiquitin carboxyl-terminal hydrolase 18/41 [EC:3.4.19.12]	AWO98167.1//putative ubl carboxyl-terminal hydrolase 18-like isoform 4 [Scophthalmus maximus];AWO98164.1//putative ubl carboxyl-terminal hydrolase 18-like [Scophthalmus maximus];AWO98166.1//putative ubl carboxyl-terminal hydrolase 18-like isoform 3 [Scophthalmus maximus];AWO98168.1//putative ubl carboxyl-terminal hydrolase 18-like isoform 5 [Scophthalmus maximus];AWO98165.1//putative ubl carboxyl…
SMAX5B_012830	CP026252.1	complement(18423312..18426634)	31.9041	2.59007	6.02128	9.05847e-12	1.06667e-09	1.71885e-07	protein_coding	K12023//tripartite motif-containing protein 47;K12006//tripartite motif-containing protein 16	AWP08752.1//putative tripartite motif-containing protein 16-like [Scophthalmus maximus]
SMAX5B_017128	CP026260.1	740399..743604	254.696	2.57316	5.95113	5.02388e-19	1.52735e-16	9.53282e-15	protein_coding	K10044//retinoic acid receptor responder protein 2	AWP17040.1//Hypothetical protein SMAX5B_017128 [Scophthalmus maximus];AWP17039.1//Hypothetical protein SMAX5B_017128 [Scophthalmus maximus]
SMAX5B_008334	CP026262.1	complement(9113064..9116757)	2.1508	2.56192	5.90492	0.00429001	0.0505543	1	protein_coding	K07608//internexin neuronal intermediate filament protein, alpha;K07610//desmin	AWP19877.1//putative glial fibrillary acidic protein-like [Scophthalmus maximus];XP_035472523.1//notochord granular surface isoform X3 [Scophthalmus maximus]
SMAX5B_003208	CP026247.1	26250007..26250701	99.6184	2.55427	5.8737	5.06529e-12	6.09328e-10	9.61138e-08	protein_coding	K23168//protein MPAN	XP_035483888.1//protein C19orf12 homolog [Scophthalmus maximus]
SMAX5B_000987	CP026253.1	complement(24482754..24484915)	238.268	2.55205	5.86469	3.34667e-15	7.0835e-13	6.35031e-11	protein_coding	K05146//tumor necrosis factor receptor superfamily member 9	AWP10353.1//putative tumor necrosis factor receptor superfamily member 9-like [Scophthalmus maximus]
SMAX5B_007298	CP026250.1	complement(13816236..13840825)	191.508	2.52438	5.75326	4.62003e-17	1.18848e-14	8.76651e-13	protein_coding	K06457//T-cell surface glycoprotein CD7;K06747//immune costimulatory protein B7-H4;K23268//V-type immunoglobulin domain-containing suppressor of T-cell activation;K06746//immune costimulatory protein B7-H3	AWP05827.1//Hypothetical protein SMAX5B_007298 [Scophthalmus maximus];XP_035492776.1//uncharacterized protein LOC118312356 [Scophthalmus maximus];XP_035492771.1//butyrophilin subfamily 1 member A1 [Scophthalmus maximus];XP_035492778.1//jupiter microtubule associated homolog 1a isoform X2 [Scophthalmus maximus]
SMAX5B_009289	CP026255.1	7265596..7269075	3.78687	2.52016	5.73647	0.00120636	0.0190776	1	protein_coding	K10651//tripartite motif-containing protein 21 [EC:2.3.2.27];K12015//tripartite motif-containing protein 39 [EC:2.3.2.27]	KAF0039858.1//hypothetical protein F2P81_008093 [Scophthalmus maximus];AWP11810.1//putative E3 ubiquitin-protein ligase TRIM21-like [Scophthalmus maximus]
SMAX5B_005977	CP026249.1	15593957..15597265	1.81545	2.51915	5.73243	0.00112217	0.0180944	1	protein_coding	K12385//Niemann-Pick C1 protein;K14461//Niemann-Pick C1-like protein 1	AWP04493.1//putative patched domain-containing protein 3-like [Scophthalmus maximus]
SMAX5B_019241	CP026253.1	22246747..22253322	107.124	2.5146	5.71439	1.64278e-18	4.8191e-16	3.11717e-14	protein_coding	K09445//interferon regulatory factor 4	AWP10230.1//putative interferon regulatory factor 4-like [Scophthalmus maximus]
SMAX5B_003959	CP026252.1	complement(21770212..21800114)	156.954	2.5108	5.69937	2.45063e-18	7.06499e-16	4.65007e-14	protein_coding	K22615//NLR family CARD domain containing 5	XP_022605624.1//protein NLRC5 isoform X8 [Seriola dumerili];AWP08896.1//putative protein NLRC5 [Scophthalmus maximus];XP_022605623.1//protein NLRC5 isoform X7 [Seriola dumerili];XP_034444370.1//protein NLRC5 isoform X2 [Hippoglossus hippoglossus];XP_035498014.1//protein NLRC5 isoform X2 [Scophthalmus maximus]
SMAX5B_016739	CP026244.1	complement(19772933..19775463)	50.4192	2.50343	5.67031	9.59453e-13	1.3712e-10	1.82056e-08	protein_coding	K21955//DNA damage-regulated autophagy modulator protein 1	XP_035469695.1//DNA damage-regulated autophagy modulator protein 1 [Scophthalmus maximus]
SMAX5B_015485	CP026249.1	145025..147861	166.366	2.46956	5.53873	3.50691e-15	7.32989e-13	6.65437e-11	protein_coding	K12800//NACHT, LRR and PYD domains-containing protein 3;K23573//dentin sialophosphoprotein	XP_035490014.1//uncharacterized protein LOC118310815 isoform X1 [Scophthalmus maximus];KAF0046405.1//hypothetical protein F2P81_000038 [Scophthalmus maximus]
SMAX5B_019483	CP026244.1	7744837..7748414	130.889	2.46947	5.53839	9.82754e-26	5.1352e-23	1.86478e-21	protein_coding	K06712//butyrophilin	AWO97683.1//putative butyrophilin subfamily 2 member A2-like [Scophthalmus maximus]
SMAX5B_003674	CP026258.1	complement(8114075..8123609)	8.1868	2.44662	5.45139	3.31265e-07	1.70433e-05	0.00628576	protein_coding	K20462//oxysterol-binding protein 2	XP_035463729.1//oxysterol-binding protein 2 [Scophthalmus maximus];AWP15202.1//Oxysterol-binding protein [Scophthalmus maximus]
SMAX5B_017261	CP026260.1	complement(16674230..16683308)	2.76153	2.43395	5.40372	0.00102185	0.0167842	1	protein_coding	K01620//threonine aldolase [EC:4.1.2.48]	AWP17952.1//putative low-specificity L-threonine aldolase 2 [Scophthalmus maximus]
SMAX5B_022656	CP026254.1	complement(4493418..4558198)	1.49083	2.42847	5.38323	0.00105159	0.0170384	1	protein_coding	K07380//contactin associated protein-like 2	XP_035033545.1//contactin-associated protein-like 4 [Hippoglossus stenolepis];XP_035503826.1//contactin-associated protein-like 4 isoform X2 [Scophthalmus maximus];XP_035503825.1//contactin-associated protein-like 4 isoform X1 [Scophthalmus maximus]
SMAX5B_003061	CP026256.1	21582506..21584243	6.10205	2.41889	5.34758	0.0027682	0.0362467	1	protein_coding	K06538//cytotoxic T-lymphocyte-associated protein 4	AWP13661.1//putative cytotoxic T-lymphocyte protein 4-like [Scophthalmus maximus]
SMAX5B_011533	CP026250.1	complement(4783744..4805198)	204.301	2.40867	5.30985	3.19291e-09	2.41577e-07	6.05854e-05	protein_coding	K10104//ficolin;K07196//thyroid hormone receptor interactor 10	XP_035494133.1//microfibril-associated glycoprotein 4-like [Scophthalmus maximus];AWP05310.1//putative cdc42-interacting protein 4 [Scophthalmus maximus]
SMAX5B_004938	CP026250.1	complement(25129256..25130736)	3.32444	2.40576	5.29915	0.00549059	0.0600053	1	protein_coding	K04140//adrenergic receptor alpha-2C	XP_035494449.1//alpha-2C adrenergic receptor [Scophthalmus maximus]
SMAX5B_014672	CP026253.1	19544672..19546127	98.881	2.40204	5.28549	5.66241e-15	1.15465e-12	1.07444e-10	protein_coding	K10099//F-box protein 2;K08716//solute carrier family 14 (urea transporter)	AWP10045.1//Hypothetical protein SMAX5B_014672 [Scophthalmus maximus]
SMAX5B_004002	CP026246.1	complement(8804293..8808753)	449.881	2.40198	5.28529	1.64102e-09	1.29431e-07	3.11383e-05	protein_coding	K09444//interferon regulatory factor 1	AWP00009.1//Interferon regulatory factor [Scophthalmus maximus];AWP00011.1//Interferon regulatory factor isoform 3 [Scophthalmus maximus];AWP00012.1//Interferon regulatory factor isoform 4 [Scophthalmus maximus];AAY68278.1//interferon regulatory factor 1 [Scophthalmus maximus]
SMAX5B_000600	CP026245.1	complement(22221643..22222680)	156.003	2.40042	5.27956	1.26083e-18	3.7647e-16	2.39243e-14	protein_coding	K04010//C5a anaphylatoxin chemotactic receptor 1	XP_035478368.1//C5a anaphylatoxin chemotactic receptor 1 [Scophthalmus maximus]
SMAX5B_000078	CP026262.1	complement(18587455..18622640)	34.4269	2.39249	5.25061	8.07603e-15	1.62698e-12	1.53243e-10	protein_coding	K09032//activating transcription factor 3	AWP20422.1//putative cyclic AMP-dependent transcription factor ATF-3 [Scophthalmus maximus];KAF0023924.1//hypothetical protein F2P81_024554 [Scophthalmus maximus]
SMAX5B_013474	CP026245.1	11787794..11791894	40.0041	2.38918	5.23859	2.75444e-15	6.06012e-13	5.22654e-11	protein_coding	K01370//caspase 1 [EC:3.4.22.36]	XP_035477606.1//caspase-1-A-like [Scophthalmus maximus]
SMAX5B_009829	CP026252.1	complement(10300898..10317416)	2.40929	2.38318	5.21684	0.00796784	0.079351	1	protein_coding	K09451//homeobox protein aristaless-like 4	XP_035497401.1//homeobox protein aristaless-like 4b [Scophthalmus maximus]
SMAX5B_002201	CP026248.1	11338909..11370320	98.4848	2.37491	5.18704	1.67008e-20	5.94156e-18	3.16897e-16	protein_coding	K03178//ubiquitin-activating enzyme E1 [EC:6.2.1.45]	XP_035487411.1//ubiquitin-like modifier-activating enzyme 1 [Scophthalmus maximus]
SMAX5B_015722	CP026264.1	complement(4575238..4677999)	1.43594	2.37136	5.1743	0.00240676	0.0324544	1	protein_coding	K08897//Eph receptor A10 [EC:2.7.10.1]	AWP21420.1//putative ephrin type-A receptor 7-like [Scophthalmus maximus];XP_033492955.1//ephrin type-A receptor 7-like [Epinephelus lanceolatus]
SMAX5B_018456	CP026256.1	11727399..11747433	1.60572	2.37063	5.17167	0.00376657	0.045771	1	protein_coding	K04834//voltage-gated sodium channel type II alpha	XP_035460254.1//sodium channel, voltage-gated, type I-like, alpha isoform X1 [Scophthalmus maximus];AWP13069.1//putative sodium channel protein type 2 subunit alpha-like [Scophthalmus maximus]
SMAX5B_018404	CP026256.1	complement(5469156..5482713)	183.392	2.34533	5.08175	3.52518e-11	3.73407e-09	6.68903e-07	protein_coding	K15261//poly [ADP-ribose] polymerase 10/14/15 [EC:2.4.2.30]	XP_018537763.1//PREDICTED: LOW QUALITY PROTEIN: poly [ADP-ribose] polymerase 14-like [Lates calcarifer];AWP12806.1//putative poly [Scophthalmus maximus]
SMAX5B_018050	CP026257.1	7312495..7316575	22.1287	2.34378	5.07632	1.02773e-10	1.01086e-08	1.95011e-06	protein_coding	K05425//interleukin 12B	XP_028324700.1//ubiquitin domain-containing protein 1-like isoform X3 [Gouania willdenowi];XP_033469989.1//ubiquitin domain-containing protein 1a isoform X1 [Epinephelus lanceolatus]
SMAX5B_004702	CP026251.1	complement(24413512..24428096)	96.3556	2.3347	5.04446	3.88036e-14	6.97672e-12	7.36298e-10	protein_coding	K15261//poly [ADP-ribose] polymerase 10/14/15 [EC:2.4.2.30]	XP_018519148.1//PREDICTED: poly [ADP-ribose] polymerase 14-like [Lates calcarifer];AWP07718.1//putative poly [Scophthalmus maximus]
SMAX5B_015577	CP026264.1	complement(1688522..1691910)	324.028	2.33428	5.043	2.10637e-16	5.2568e-14	3.99683e-12	protein_coding	K02739//20S proteasome subunit beta 2 [EC:3.4.25.1];K02738//20S proteasome subunit beta 1 [EC:3.4.25.1]	XP_035477148.1//proteasome 20S subunit beta 13a [Scophthalmus maximus];XP_035477150.1//proteasome 20S subunit beta 12 isoform X1 [Scophthalmus maximus]
SMAX5B_015913	CP026264.1	9836613..9845703	25.4853	2.33387	5.04155	4.0087e-09	2.95284e-07	7.60651e-05	protein_coding	K06591//integrin beta 8	AWP21753.1//hypothetical protein SMAX5B_015913 [Scophthalmus maximus];XP_035475933.1//integrin beta-8 isoform X1 [Scophthalmus maximus]
SMAX5B_005086	CP026252.1	complement(5740711..5757662)	2.52191	2.33223	5.03584	5.63105e-05	0.00155118	1	protein_coding	K19912//synaptotagmin-12	AWP08028.1//putative synaptotagmin-12 [Scophthalmus maximus];XP_011842359.1//PREDICTED: synaptotagmin-12 isoform X1 [Mandrillus leucophaeus]
SMAX5B_013123	CP026247.1	complement(22927682..23097068)	3.77517	2.30499	4.94165	0.00263868	0.0350169	1	protein_coding	K05101//neurotrophic tyrosine kinase, receptor type 3 [EC:2.7.10.1]	AWP01964.1//Tyrosine-protein kinase receptor [Scophthalmus maximus];XP_029947511.1//NT-3 growth factor receptor isoform X3 [Salarias fasciatus];XP_019935202.1//PREDICTED: NT-3 growth factor receptor-like isoform X4 [Paralichthys olivaceus]
SMAX5B_003654	CP026258.1	8320253..8328281	202.153	2.30341	4.93623	4.29155e-15	8.85915e-13	8.14322e-11	protein_coding	K18592//gamma-glutamyltranspeptidase / glutathione hydrolase / leukotriene-C4 hydrolase [EC:2.3.2.2 3.4.19.13 3.4.19.14]	AWP15224.1//putative gamma-glutamyltransferase 5-like [Scophthalmus maximus]
SMAX5B_005974	CP026249.1	11450760..11456106	60.1628	2.30045	4.92612	1.66253e-11	1.85328e-09	3.15465e-07	protein_coding	K04818//nicotinic acetylcholine receptor gamma	AWP04166.1//putative acetylcholine receptor subunit gamma [Scophthalmus maximus]
SMAX5B_017940	CP026257.1	9143041..9251122	9.55843	2.28935	4.88835	1.82089e-08	1.23267e-06	0.000345513	protein_coding	K07377//neurexin	XP_034754932.1//neurexin-1a isoform X6 [Etheostoma cragini];XP_035461644.1//neurexin-1a isoform X1 [Scophthalmus maximus];XP_016523965.1//PREDICTED: neurexin-1 isoform X5 [Poecilia formosa];XP_034754930.1//neurexin-1a isoform X4 [Etheostoma cragini];XP_007546271.1//PREDICTED: neurexin-1 isoform X17 [Poecilia formosa];TDH01155.1//hypothetical protein EPR50_G00177240 [Perca flavescens]
SMAX5B_007524	CP026250.1	complement(17518372..17520983)	18.5762	2.28631	4.87806	0.000208801	0.00458184	1	protein_coding	K13912//deleted in malignant brain tumors 1 protein	AWP06082.1//putative uromodulin-like [Scophthalmus maximus]
SMAX5B_021054	CP026261.1	complement(13675224..13690634)	2.55114	2.28507	4.87387	0.00350825	0.0434207	1	protein_coding	K08027//nuclear receptor subfamily 5 group A member 2	AWP19091.1//putative nuclear receptor subfamily 5 group A member 2-like [Scophthalmus maximus]
SMAX5B_003990	CP026246.1	complement(12365834..12383833)	2.76186	2.27464	4.83877	0.0092772	0.087889	1	protein_coding	K16579//neuronal migration protein doublecortin	XP_035482416.1//neuronal migration protein doublecortin-like isoform X1 [Scophthalmus maximus];XP_035482420.1//neuronal migration protein doublecortin-like isoform X2 [Scophthalmus maximus]
SMAX5B_003264	CP026253.1	9353845..9369618	7.42585	2.27454	4.83845	0.000132094	0.00315987	1	protein_coding	K10396//kinesin family member 5	AWP09456.1//Kinesin-like protein [Scophthalmus maximus]
SMAX5B_019741	CP026244.1	366715..371747	51.6975	2.27144	4.82803	3.5284e-11	3.73407e-09	6.69513e-07	protein_coding	K12803//pyrin;K10651//tripartite motif-containing protein 21 [EC:2.3.2.27];K12015//tripartite motif-containing protein 39 [EC:2.3.2.27]	XP_035470848.1//uncharacterized protein LOC118288647 [Scophthalmus maximus];AWO97222.1//putative E3 ubiquitin-protein ligase TRIM39-like [Scophthalmus maximus];AWO97221.1//putative E3 ubiquitin-protein ligase TRIM39-like [Scophthalmus maximus];KAF0028853.1//hypothetical protein F2P81_017958 [Scophthalmus maximus]
SMAX5B_004593	CP026249.1	944958..970678	6.6623	2.25192	4.76317	4.46868e-05	0.00127728	0.847932	protein_coding	K00850//6-phosphofructokinase 1 [EC:2.7.1.11]	XP_035490902.1//ATP-dependent 6-phosphofructokinase, platelet type-like isoform X2 [Scophthalmus maximus];XP_035490901.1//ATP-dependent 6-phosphofructokinase, platelet type-like isoform X1 [Scophthalmus maximus]
SMAX5B_003548	CP026258.1	complement(8204130..8217851)	1.618	2.23976	4.72319	0.00130042	0.0202272	1	protein_coding	K05502//bone morphogenetic protein 1 [EC:3.4.24.19]	XP_035463338.1//bone morphogenetic protein 1-like isoform X1 [Scophthalmus maximus];XP_035463340.1//bone morphogenetic protein 1-like isoform X2 [Scophthalmus maximus]
SMAX5B_018702	CP026244.1	complement(23082589..23086640)	6.84678	2.22927	4.68898	0.00946273	0.0891416	1	protein_coding	K04687//interferon gamma	KAF0028773.1//hypothetical protein F2P81_017878 [Scophthalmus maximus]
SMAX5B_001466	CP026244.1	5484177..5487809	4.12363	2.22707	4.68182	0.000301012	0.00618331	1	protein_coding	K13172//serine/arginine repetitive matrix protein 2	AWO97579.1//Ribosome biogenesis protein nep1 -like putative [Scophthalmus maximus]
SMAX5B_020536	CP026260.1	20339357..20369047	42.6447	2.20853	4.62205	7.71304e-12	9.1468e-10	1.46355e-07	protein_coding	K22754//E3 ubiquitin-protein ligase RNF213 [EC:2.3.2.27]	XP_035468092.1//LOW QUALITY PROTEIN: E3 ubiquitin-protein ligase rnf213-beta [Scophthalmus maximus];AWP18160.1//putative E3 ubiquitin-protein ligase RNF213-like [Scophthalmus maximus]
SMAX5B_009054	CP026259.1	1507056..1511754	29.2847	2.20108	4.59822	1.51582e-12	2.06065e-10	2.87626e-08	protein_coding	K19989//tumor necrosis factor alpha-induced protein 2;K19987//exocyst complex component 3-like protein;K06110//exocyst complex component 3	XP_035466481.1//exocyst complex component 3-like protein 4 [Scophthalmus maximus];AWP15984.1//putative exocyst complex component 3-like [Scophthalmus maximus]
SMAX5B_007568	CP026250.1	14372456..14379539	29.1619	2.18993	4.56284	2.16554e-12	2.82891e-10	4.10911e-08	protein_coding	K06829//insulin-like growth factor-binding protein 10	XP_035491909.1//LOW QUALITY PROTEIN: CCN family member 1-like [Scophthalmus maximus]
SMAX5B_005477	CP026244.1	13332165..13344664	12.0069	2.18816	4.55723	8.18836e-06	0.000297647	0.155374	protein_coding	K05168//interleukin 17 receptor E;K16608//tubulin monoglycylase TTLL3/8 [EC:6.3.2.-]	AWO97933.1//putative interleukin-17 receptor E-like [Scophthalmus maximus]
SMAX5B_019194	CP026255.1	complement(16670269..16688688)	40.8105	2.17681	4.52153	0.00457318	0.0530292	1	protein_coding	K05764//thymosin, beta 4	AWP12373.1//Thymosin beta [Scophthalmus maximus]
SMAX5B_018692	CP026256.1	15741063..15742255	104.689	2.171	4.50335	3.10104e-10	2.80283e-08	5.88422e-06	protein_coding	K23310//PHD finger protein 6	XP_035507079.1//actin cytoskeleton-regulatory complex protein PAN1 isoform X2 [Scophthalmus maximus];KAF0026626.1//hypothetical protein F2P81_021363 [Scophthalmus maximus]
SMAX5B_014625	CP026253.1	20053527..20058035	9.14435	2.17083	4.50283	7.55249e-05	0.00197629	1	protein_coding	K23089//WNT1-inducible-signaling pathway protein 2	XP_035501920.1//WNT1-inducible-signaling pathway protein 2 [Scophthalmus maximus]
SMAX5B_022472	CP026254.1	complement(11828314..11839329)	179.52	2.16958	4.49894	2.42809e-12	3.09924e-10	4.6073e-08	protein_coding	K10955//mucin-2;K06260//platelet glycoprotein V	XP_035504338.1//platelet glycoprotein V [Scophthalmus maximus];XP_021347135.1//mucin-2-like [Mizuhopecten yessoensis];XP_029285464.1//LOW QUALITY PROTEIN: uncharacterized protein LOC115006973 [Cottoperca gobio];KAF6035700.1//hypothetical protein EB796_005984 [Bugula neritina];AWP10910.1//putative slit -like 2 protein-like [Scophthalmus maximus]
SMAX5B_003991	CP026246.1	15212604..15217363	3.74238	2.1692	4.49774	0.00026294	0.00547658	1	protein_coding	K16499//protocadherin delta 2	XP_031713269.1//uncharacterized protein LOC116389019 [Anarrhichthys ocellatus]
SMAX5B_000403	CP026259.1	complement(10875388..10884865)	5.99209	2.15168	4.44344	0.00497876	0.0561895	1	protein_coding	NA	AWP16522.1//putative proline-rich membrane anchor 1-like [Scophthalmus maximus]
SMAX5B_001657	CP026250.1	complement(19140739..19143433)	1.87678	2.15164	4.44334	0.00979595	0.0913033	1	protein_coding	K19535//synaptonemal complex central element protein 2	XP_035492125.1//synaptonemal complex central element protein 2 [Scophthalmus maximus]
SMAX5B_020736	CP026261.1	14011442..14019460	198.651	2.1284	4.37232	3.00258e-16	7.0713e-14	5.6974e-12	protein_coding	K17341//hemicentin	AWP19115.1//putative hemicentin-1-like [Scophthalmus maximus];XP_035036767.1//hemicentin-1-like [Hippoglossus stenolepis];XP_031168178.1//hemicentin-2-like isoform X1 [Sander lucioperca]
SMAX5B_003482	CP026259.1	complement(13519041..13566330)	1.61786	2.12379	4.35838	0.00843845	0.0825625	1	protein_coding	K12360//ceroid-lipofuscinosis neuronal protein 8;K15008//discs, large-associated protein 1	XP_035466227.1//disks large-associated protein 2 isoform X6 [Scophthalmus maximus];AWP16706.1//putative disks large-associated protein 2 [Scophthalmus maximus]
SMAX5B_021679	CP026256.1	1818616..1821316	6.35736	2.12156	4.35163	0.00410453	0.0490928	1	protein_coding	K07909//Ras-related protein Rab-17	XP_035459980.1//ras-related protein Rab-17-like [Scophthalmus maximus];AWP12718.1//hypothetical protein SMAX5B_021679 [Scophthalmus maximus]
SMAX5B_008396	CP026245.1	2914107..2928937	1.99512	2.11963	4.34583	0.00449484	0.0523751	1	protein_coding	K08623//a disintegrin and metalloproteinase with thrombospondin motifs 8 [EC:3.4.24.-]	AWO98483.1//putative disintegrin and metalloproteinase with thrombospondin motifs 8 [Scophthalmus maximus]
SMAX5B_010411	CP026251.1	17877123..17879474	5.69284	2.11739	4.33908	0.00102914	0.0168379	1	protein_coding	NA	AWP07367.1//Lipoma HMGIC fusion partner-like 2 protein [Scophthalmus maximus]
SMAX5B_004142	CP026246.1	complement(14423676..14425851)	4.44173	2.11553	4.33348	0.0015656	0.0234154	1	protein_coding	K16666//oligodendrocyte myelin glycoprotein	XP_023273933.1//oligodendrocyte-myelin glycoprotein-like [Seriola lalandi dorsalis];XP_035481343.1//oligodendrocyte-myelin glycoprotein-like isoform X3 [Scophthalmus maximus]
SMAX5B_017259	CP026260.1	16694368..16714062	76.0489	2.11518	4.33243	2.57878e-16	6.18882e-14	4.89323e-12	protein_coding	K00995//CDP-diacylglycerol---glycerol-3-phosphate 3-phosphatidyltransferase [EC:2.7.8.5]	AWP17954.1//putative CDP-diacylglycerol--glycerol-3-phosphate 3-phosphatidyltransferase mitochondrial [Scophthalmus maximus]
SMAX5B_010872	CP026251.1	complement(8713171..8765875)	4.90271	2.11182	4.32235	0.00267694	0.0352455	1	protein_coding	K06910//phosphatidylethanolamine-binding protein	AWP06855.1//putative phosphatidylethanolamine-binding protein 4 [Scophthalmus maximus];AWP06858.1//putative phosphatidylethanolamine-binding protein 4 isoform 4 [Scophthalmus maximus];AWP06856.1//putative phosphatidylethanolamine-binding protein 4 isoform 2 [Scophthalmus maximus];AWP06857.1//putative phosphatidylethanolamine-binding protein 4 isoform 3 [Scophthalmus maximus]
SMAX5B_009904	CP026252.1	11796971..11813434	16.6505	2.1069	4.30766	1.26979e-10	1.22024e-08	2.40942e-06	protein_coding	K20163//DENN domain-containing protein 4	AWP08387.1//putative C-myc promoter-binding protein [Scophthalmus maximus];XP_035498662.1//C-myc promoter-binding protein isoform X1 [Scophthalmus maximus];XP_035498664.1//C-myc promoter-binding protein isoform X2 [Scophthalmus maximus]
SMAX5B_017392	CP026260.1	16824275..16828671	3.00439	2.10026	4.28787	0.00746776	0.0755473	1	protein_coding	K04819//5-hydroxytryptamine receptor 3	AWP17966.1//putative 5-hydroxytryptamine receptor 3A-like [Scophthalmus maximus]
SMAX5B_011854	CP026243.1	complement(17387627..17392017)	49.3485	2.09919	4.28469	0.000152807	0.00357355	1	protein_coding	K07375//tubulin beta	NP_942113.1//tubulin beta-5 chain [Danio rerio]
SMAX5B_018720	CP026244.1	complement(23091358..23102405)	6.6398	2.09383	4.2688	0.00326604	0.0408832	1	protein_coding	K05446//interleukin 26;K23573//dentin sialophosphoprotein	AWO98324.1//putative uncharacterized protein LOC103459382 [Scophthalmus maximus];KAF0028772.1//hypothetical protein F2P81_017877 [Scophthalmus maximus];XP_011896280.1//PREDICTED: mucin-19-like, partial [Cercocebus atys]
SMAX5B_016759	CP026254.1	complement(1880993..1881948)	13.6452	2.08696	4.2485	0.000618469	0.0110722	1	protein_coding	K04402//growth arrest and DNA-damage-inducible protein	AWP10502.1//putative growth arrest and DNA damage-inducible protein GADD45 beta [Scophthalmus maximus]
SMAX5B_015995	CP026261.1	complement(19586629..19596001)	14.5825	2.08319	4.23742	1.69879e-07	9.37472e-06	0.00322345	protein_coding	K14480//apolipoprotein L	AWP19449.1//putative apolipoprotein L3-like [Scophthalmus maximus];XP_035471686.1//uncharacterized protein apol [Scophthalmus maximus]
SMAX5B_015619	CP026264.1	complement(1686526..1688379)	274.153	2.07639	4.2175	1.11866e-13	1.90869e-11	2.12266e-09	protein_coding	K02741//20S proteasome subunit beta 9 [EC:3.4.25.1]	XP_035477152.1//proteasome subunit beta type-9 [Scophthalmus maximus];AWP21242.1//Proteasome subunit beta type isoform 2 [Scophthalmus maximus]
SMAX5B_013498	CP026245.1	complement(15207020..15218962)	64.2937	2.07397	4.21044	1.28517e-14	2.52816e-12	2.43862e-10	protein_coding	K22372//E3 ISG15--protein ligase [EC:2.3.2.-]	AWO99109.1//putative E3 ubiquitin-protein ligase HERC6 [Scophthalmus maximus];AWO99110.1//putative E3 ubiquitin-protein ligase HERC6 isoform 2 [Scophthalmus maximus]
SMAX5B_008360	CP026249.1	complement(1108065..1109522)	42.3785	2.07199	4.20466	7.78398e-08	4.7158e-06	0.00147701	protein_coding	K10955//mucin-2;K04377//Myc proto-oncogene protein	AWP03609.1//putative myc proto-oncogene protein-like [Scophthalmus maximus];XP_025758309.1//mucin-2 [Oreochromis niloticus];KAF0046419.1//hypothetical protein F2P81_000052 [Scophthalmus maximus]
SMAX5B_004066	CP026246.1	complement(13184669..13187949)	5.31102	2.06441	4.18262	0.00882729	0.0848521	1	protein_coding	K01540//sodium/potassium-transporting ATPase subunit beta	AWP00200.1//Sodium potassium enzyme subunit beta 2 [Scophthalmus maximus]
SMAX5B_011695	CP026243.1	21052770..21054674	48.7497	2.06294	4.17836	1.92404e-14	3.74092e-12	3.65087e-10	protein_coding	K17924//sorting nexin-10/11	AWO96727.1//putative sorting nexin-10 [Scophthalmus maximus];AWO96729.1//putative sorting nexin-10 isoform 3 [Scophthalmus maximus];AWO96728.1//putative sorting nexin-10 isoform 2 [Scophthalmus maximus]
SMAX5B_020333	CP026260.1	10379527..10382845	7.41197	2.06121	4.17337	0.000294584	0.00606618	1	protein_coding	K05423//granulocyte colony-stimulating factor	XP_035467819.1//uncharacterized protein LOC118287116 isoform X2 [Scophthalmus maximus];XP_035467818.1//uncharacterized protein LOC118287116 isoform X1 [Scophthalmus maximus]
SMAX5B_004510	CP026244.1	complement(885598..888707)	52.7832	2.05852	4.16558	3.27898e-09	2.45865e-07	6.22187e-05	protein_coding	NA	AWO97270.1//Hypothetical protein SMAX5B_004510 [Scophthalmus maximus]
SMAX5B_015655	CP026264.1	complement(7695477..7704158)	5.92385	2.04466	4.12575	0.000343281	0.00691566	1	protein_coding	K06258//MFS transporter, VNT family, synaptic vesicle glycoprotein 2	XP_026204456.1//synaptic vesicle glycoprotein 2A-like [Anabas testudineus];XP_035476547.1//synaptic vesicle glycoprotein 2A-like [Scophthalmus maximus]
SMAX5B_007750	CP026244.1	complement(16789870..16792630)	26.3121	2.0434	4.12216	1.12209e-07	6.58332e-06	0.00212917	protein_coding	K17349//tetraspanin-8	AWO98041.1//Hypothetical protein SMAX5B_007750 [Scophthalmus maximus];XP_035504092.1//uncharacterized protein LOC118318484 [Scophthalmus maximus]
SMAX5B_004934	CP026250.1	25509358..25510639	55.7563	2.04175	4.11746	6.856e-13	1.01451e-10	1.30093e-08	protein_coding	K09028//transcription factor jun-B	KAF0038031.1//hypothetical protein F2P81_010905 [Scophthalmus maximus]
SMAX5B_013274	CP026256.1	complement(21874911..21877685)	44.6281	2.0335	4.09397	8.36901e-15	1.66593e-12	1.58802e-10	protein_coding	K05810//polyphenol oxidase [EC:1.10.3.-]	KAF5162247.1//hypothetical protein HST_G00131280, partial [Hippoglossus stenolepis];XP_035507139.1//purine nucleoside phosphorylase LACC1 [Scophthalmus maximus]
SMAX5B_015625	CP026264.1	1655289..1660328	160.796	2.01343	4.03741	1.55745e-08	1.07169e-06	0.000295526	protein_coding	K06751//MHC class I antigen	AWP21234.1//putative major histocompatibility complex class I-related protein-like [Scophthalmus maximus]
SMAX5B_005928	CP026249.1	15140675..15157399	7.35493	2.01335	4.0372	0.00412866	0.0492758	1	protein_coding	K01528//dynamin 1/3 [EC:3.6.5.5]	XP_022049187.1//dynamin-3-like [Acanthochromis polyacanthus];XP_013131860.1//dynamin-3 [Oreochromis niloticus]
SMAX5B_021694	CP026256.1	complement(1445889..1457236)	44.9457	2.00775	4.02154	2.46589e-16	6.06354e-14	4.67902e-12	protein_coding	K11220//signal transducer and activator of transcription 1	XP_035460424.1//signal transducer and activator of transcription 1-alpha/beta-like isoform X2 [Scophthalmus maximus];AWP12689.1//putative signal transducer and activator of transcription 1-alpha/beta [Scophthalmus maximus]
SMAX5B_018921	CP026255.1	14742782..14746184	87.5244	2.00644	4.01791	2.57076e-10	2.36185e-08	4.87802e-06	protein_coding	K12559//myosin X;K05012//chloride channel 3/4/5;K12665//cytochrome P450 family 26 subfamily C;K04677//mothers against decapentaplegic homolog 6	AWP12271.1//putative regulator of cell cycle RGCC-like [Scophthalmus maximus];XP_029571676.1//filaggrin-2-like isoform X2 [Salmo trutta];XP_029571677.1//filaggrin-2-like isoform X3 [Salmo trutta]
SMAX5B_014590	CP026253.1	17634565..17639176	331.843	1.98989	3.97207	1.04857e-10	1.02533e-08	1.98967e-06	protein_coding	K08807//proto-oncogene serine/threonine-protein kinase Pim-3 [EC:2.7.11.1];K04702//proto-oncogene serine/threonine-protein kinase Pim-1 [EC:2.7.11.1]	AWP09950.1//putative serine/threonine-protein kinase pim-2 [Scophthalmus maximus]
SMAX5B_007229	CP026260.1	complement(21008349..21013693)	40.1054	1.9889	3.96933	2.38926e-14	4.53987e-12	4.53362e-10	protein_coding	K08402//hydroxycarboxylic acid receptor 2/3	AWP18194.1//putative hydroxycarboxylic acid receptor 2-like [Scophthalmus maximus];XP_035469015.1//hydroxycarboxylic acid receptor 2-like [Scophthalmus maximus]
SMAX5B_010432	CP026251.1	20358849..20364670	15.9865	1.97352	3.92726	4.67112e-07	2.29996e-05	0.00886346	protein_coding	K01352//granzyme A [EC:3.4.21.78]	AWP07529.1//hypothetical protein SMAX5B_010432 [Scophthalmus maximus];KAF0034205.1//hypothetical protein F2P81_014271 [Scophthalmus maximus];AWP07528.1//hypothetical protein SMAX5B_010432 [Scophthalmus maximus]
SMAX5B_020240	CP026260.1	7323024..7324043	14.9746	1.97339	3.9269	5.59411e-05	0.00154816	1	protein_coding	K04218//somatostatin receptor 2	XP_035469415.1//somatostatin receptor type 5 [Scophthalmus maximus]
SMAX5B_008682	CP026257.1	16274551..16316417	30.2001	1.9682	3.91279	9.55459e-14	1.64703e-11	1.81298e-09	protein_coding	K19559//latent transforming growth factor beta binding protein 1	XP_035461819.1//latent-transforming growth factor beta-binding protein 1 isoform X4 [Scophthalmus maximus];XP_035461815.1//latent-transforming growth factor beta-binding protein 1 isoform X1 [Scophthalmus maximus];AWP14468.1//putative latent-transforming growth factor beta-binding protein 1 [Scophthalmus maximus]
SMAX5B_008088	CP026258.1	complement(21112182..21115888)	59.5633	1.96701	3.90957	1.57892e-10	1.47493e-08	2.99601e-06	protein_coding	K14709//solute carrier family 39 (zinc transporter), member 1/2/3	XP_035463499.1//zinc transporter ZIP1-like [Scophthalmus maximus]
SMAX5B_022288	CP026254.1	complement(14062228..14068866)	162.188	1.93985	3.83665	1.1999e-10	1.15974e-08	2.27681e-06	protein_coding	K06494//selectin, endothelial cell	XP_035502827.1//E-selectin-like isoform X1 [Scophthalmus maximus]
SMAX5B_004753	CP026256.1	20620904..20636089	7.9932	1.93255	3.8173	4.67057e-05	0.00132592	0.88624	protein_coding	K21109//MAGUK p55 subfamily member 4	AWP13594.1//putative MAGUK p55 subfamily member 4-like [Scophthalmus maximus]
SMAX5B_010264	CP026256.1	complement(21081550..21090017)	147.053	1.91575	3.77309	2.13225e-13	3.46149e-11	4.04595e-09	protein_coding	K23573//dentin sialophosphoprotein	XP_034354108.1//epithelial-stromal interaction protein 1 isoform X1 [Arvicanthis niloticus];XP_017910435.1//PREDICTED: mitogen-activated protein kinase kinase kinase kinase 4 isoform X17 [Capra hircus]
SMAX5B_021439	CP026244.1	complement(9264454..9269946)	91.8087	1.90912	3.75579	4.43806e-13	6.80814e-11	8.42121e-09	protein_coding	K05074//interleukin 15 receptor alpha	AWO97757.1//putative interleukin-15 receptor subunit alpha [Scophthalmus maximus];AWO97758.1//putative interleukin-15 receptor subunit alpha isoform 2 [Scophthalmus maximus]
SMAX5B_005276	CP026258.1	19719347..19761600	105.807	1.90322	3.74048	1.78039e-19	5.51295e-17	3.37829e-15	protein_coding	K01371//cathepsin K [EC:3.4.22.38]	ACC86112.1//cathepsin K [Paralichthys olivaceus];XP_023187411.1//cathepsin K-like [Xiphophorus maculatus];AWP15759.1//Cathepsin K [Scophthalmus maximus]
SMAX5B_000254	CP026259.1	17252819..17257770	296.241	1.90322	3.74047	1.91878e-08	1.29371e-06	0.000364089	protein_coding	K17388//Rho-associated protein kinase 2 [EC:2.7.11.1];K16487//spindle assembly abnormal protein 6;K12478//early endosome antigen 1	XP_035466746.1//putative leucine-rich repeat-containing protein DDB_G0290503 [Scophthalmus maximus];AWP16853.1//Hypothetical protein SMAX5B_000254 [Scophthalmus maximus]
SMAX5B_006966	CP026243.1	9482487..9503101	209.292	1.89759	3.72589	3.40713e-08	2.17906e-06	0.000646504	protein_coding	K11220//signal transducer and activator of transcription 1	XP_035504374.1//LOW QUALITY PROTEIN: signal transducer and activator of transcription 1-alpha/beta-like [Scophthalmus maximus];AHV91019.1//signal transducer and activator of transcription 1 variant 1 [Scophthalmus maximus];AWO95973.1//Signal transducer and activator of transcription [Scophthalmus maximus]
SMAX5B_008954	CP026259.1	complement(2826861..2837775)	1.82329	1.89457	3.71811	0.0080621	0.0800988	1	protein_coding	K08573//calpain-3 [EC:3.4.22.54]	XP_027948570.1//calpain small subunit 2 [Eumetopias jubatus];XP_034431960.1//calpain-3 isoform X1 [Hippoglossus hippoglossus]
SMAX5B_013182	CP026247.1	complement(19810308..19811852)	2.81443	1.89241	3.71255	0.00670902	0.0699386	1	protein_coding	K00699//glucuronosyltransferase [EC:2.4.1.17]	AWP01871.1//putative UDP-glucuronosyltransferase 2C1-like [Scophthalmus maximus]
SMAX5B_009964	CP026252.1	complement(8995862..9017333)	4.25513	1.89023	3.70695	0.00129252	0.0201231	1	protein_coding	K06756//neuronal cell adhesion molecule	XP_019934678.1//PREDICTED: neuronal cell adhesion molecule-like isoform X15 [Paralichthys olivaceus];XP_019934669.1//PREDICTED: neuronal cell adhesion molecule-like isoform X6 [Paralichthys olivaceus];XP_019934668.1//PREDICTED: neuronal cell adhesion molecule-like isoform X5 [Paralichthys olivaceus];XP_019934673.1//PREDICTED: neuronal cell adhesion molecule-like isoform X10 [Paralichthys olivaceu…
SMAX5B_003767	CP026244.1	complement(3719471..3723265)	57.5786	1.8837	3.69021	3.52426e-10	3.15129e-08	6.68729e-06	protein_coding	K08770//ubiquitin C;K11969//ariadne-2 [EC:2.3.2.31];K11968//ariadne-1 [EC:2.3.2.31]	XP_035469288.1//E3 ubiquitin-protein ligase RNF19B-like isoform X2 [Scophthalmus maximus];XP_035469283.1//E3 ubiquitin-protein ligase RNF19B-like isoform X1 [Scophthalmus maximus]
SMAX5B_009007	CP026259.1	4647172..4652186	3.69862	1.87882	3.67775	0.0083924	0.0823046	1	protein_coding	K10433//microtubule-associated protein 7	AWP16175.1//putative ensconsin-like [Scophthalmus maximus];XP_035466369.1//ensconsin-like isoform X1 [Scophthalmus maximus]
SMAX5B_011917	CP026243.1	18450041..18453583	29.1161	1.8756	3.66955	3.5692e-08	2.26063e-06	0.000677256	protein_coding	NA	KAF0045475.1//hypothetical protein F2P81_002004 [Scophthalmus maximus];XP_035493943.1//uncharacterized protein zgc:174888 [Scophthalmus maximus]
SMAX5B_007214	CP026260.1	21201169..21222901	3.53871	1.87373	3.66478	0.00819548	0.0808746	1	protein_coding	K07376//cGMP-dependent protein kinase 1 [EC:2.7.11.12]	XP_029383154.1//cGMP-dependent protein kinase 1-like isoform X1 [Echeneis naucrates];XP_023256801.1//cGMP-dependent protein kinase 1-like [Seriola lalandi dorsalis]
SMAX5B_015174	CP026258.1	complement(6369324..6373444)	104.045	1.86223	3.6357	1.62918e-11	1.82829e-09	3.09137e-07	protein_coding	K15707//RING finger protein 170 [EC:2.3.2.27]	XP_035463908.1//E3 ubiquitin-protein ligase RNF170 [Scophthalmus maximus]
SMAX5B_007835	CP026254.1	complement(21134253..21166866)	8.02019	1.86134	3.63345	0.0002574	0.00538671	1	protein_coding	K10392//kinesin family member 1	XP_035504202.1//kinesin-like protein KIF1A isoform X20 [Scophthalmus maximus];AWP11440.1//Kinesin-like protein [Scophthalmus maximus];AWP11442.1//Kinesin-like protein isoform 3 [Scophthalmus maximus];XP_035504189.1//kinesin-like protein KIF1A isoform X8 [Scophthalmus maximus];XP_035504196.1//kinesin-like protein KIF1A isoform X15 [Scophthalmus maximus];XP_035504181.1//kinesin-like protein KIF1A i…
SMAX5B_020486	CP026254.1	complement(2681372..2682194)	27.6769	1.85935	3.62844	8.30018e-05	0.0021411	1	protein_coding	K16449//regulator of G-protein signaling	XP_035504642.1//regulator of G-protein signaling 16 [Scophthalmus maximus];AWP10537.1//putative regulator of G-protein signaling 5-like [Scophthalmus maximus]
SMAX5B_009655	CP026264.1	11955349..11960021	16.6452	1.85928	3.62827	1.50992e-07	8.52951e-06	0.00286507	protein_coding	K22146//non-syndromic hearing impairment protein 5	AWP21864.1//putative non-syndromic hearing impairment protein 5-like [Scophthalmus maximus]
SMAX5B_001964	CP026263.1	complement(12828101..12840203)	7.55055	1.8592	3.62807	6.25605e-06	0.000235602	0.118708	protein_coding	K18808//toll-like receptor 13	AWP21060.1//Toll-like receptor 22 [Scophthalmus maximus]
SMAX5B_003755	CP026244.1	3811823..3814769	167.935	1.85908	3.62777	3.57653e-14	6.50034e-12	6.78646e-10	protein_coding	K06087//claudin	XP_035475509.1//claudin-15a [Scophthalmus maximus]
SMAX5B_007795	CP026244.1	complement(15992103..16001800)	155.43	1.85694	3.62238	5.50976e-10	4.79569e-08	1.04548e-05	protein_coding	K10955//mucin-2;K10104//ficolin;K05465//angiopoietin 1	XP_035505564.1//fibrinogen-like 2a [Scophthalmus maximus]
SMAX5B_015872	CP026264.1	complement(5402594..5404218)	32.9135	1.85081	3.60704	1.66257e-08	1.13934e-06	0.000315473	protein_coding	NA	AWP21460.1//Hypothetical protein SMAX5B_015872 [Scophthalmus maximus]
SMAX5B_012415	CP026247.1	10067439..10070093	21.4628	1.84926	3.60316	0.000181822	0.00409738	1	protein_coding	K07845//Ras-related associated with diabetes	AWP01437.1//putative GTP-binding protein RAD [Scophthalmus maximus]
SMAX5B_000641	CP026245.1	19504125..19507085	7.81628	1.84261	3.58658	0.0038002	0.0460124	1	protein_coding	K00913//inositol-1,3,4-trisphosphate 5/6-kinase / inositol-tetrakisphosphate 1-kinase [EC:2.7.1.159 2.7.1.134]	XP_018544666.1//PREDICTED: inositol-tetrakisphosphate 1-kinase-like [Lates calcarifer];AWO99299.1//putative inositol-tetrakisphosphate 1-kinase-like [Scophthalmus maximus]
SMAX5B_010366	CP026251.1	complement(19969182..19976309)	197.366	1.83751	3.57392	4.21321e-10	3.70785e-08	7.99456e-06	protein_coding	K09604//adipocyte-derived leucine aminopeptidase [EC:3.4.11.-]	XP_018528142.1//PREDICTED: LOW QUALITY PROTEIN: endoplasmic reticulum aminopeptidase 1-like [Lates calcarifer]
SMAX5B_011856	CP026243.1	complement(22780057..22785651)	8.49616	1.82925	3.55352	1.43156e-05	0.000480147	0.271639	protein_coding	K06732//CUB domain-containing protein 1	AWO96867.1//putative CUB domain-containing protein 1 [Scophthalmus maximus]
SMAX5B_001149	CP026256.1	complement(18985660..19000232)	9.2016	1.82231	3.53647	0.00255735	0.0340729	1	protein_coding	K05762//radixin	XP_029385991.1//radixin [Echeneis naucrates]
SMAX5B_021927	CP026259.1	6658867..6694985	1.02791	1.81825	3.52653	0.00802999	0.0798272	1	protein_coding	K12559//myosin X	AWP16301.1//putative unconventional myosin-X-like [Scophthalmus maximus];XP_035465894.1//unconventional myosin-X isoform X3 [Scophthalmus maximus];XP_035465896.1//unconventional myosin-X isoform X4 [Scophthalmus maximus]
SMAX5B_018095	CP026257.1	5592803..5599392	87.3544	1.81739	3.52442	3.31069e-13	5.22246e-11	6.28203e-09	protein_coding	K18055//hypoxia-inducible factor 1-alpha inhibitor (HIF hydroxylase) [EC:1.14.11.30]	XP_035461571.1//hypoxia-inducible factor 1-alpha inhibitor isoform X2 [Scophthalmus maximus];XP_035461570.1//hypoxia-inducible factor 1-alpha inhibitor isoform X1 [Scophthalmus maximus];XP_020486578.1//hypoxia-inducible factor 1-alpha inhibitor [Labrus bergylta]
SMAX5B_006108	CP026249.1	15966500..15974013	79.7551	1.81092	3.50866	4.42637e-13	6.80814e-11	8.39903e-09	protein_coding	K04398//caspase 8 [EC:3.4.22.61]	XP_035491769.1//caspase-8 [Scophthalmus maximus]
SMAX5B_010625	CP026244.1	21711631..21716298	114.598	1.80614	3.49705	8.9296e-13	1.29836e-10	1.69439e-08	protein_coding	K13172//serine/arginine repetitive matrix protein 2	XP_035476700.1//apoptosis facilitator Bcl-2-like protein 14 [Scophthalmus maximus]
SMAX5B_015760	CP026264.1	1691792..1695154	427.303	1.8049	3.49405	4.52375e-09	3.30313e-07	8.58381e-05	protein_coding	K02739//20S proteasome subunit beta 2 [EC:3.4.25.1]	XP_035477148.1//proteasome 20S subunit beta 13a [Scophthalmus maximus];AWP21247.1//putative proteasome subunit beta type-7-like [Scophthalmus maximus]
SMAX5B_000740	CP026245.1	complement(20814201..20824624)	208.845	1.80245	3.48812	1.60215e-09	1.2818e-07	3.04008e-05	protein_coding	K10798//poly [ADP-ribose] polymerase [EC:2.4.2.30]	KAF0030775.1//hypothetical protein F2P81_017506 [Scophthalmus maximus];XP_034459218.1//von Willebrand factor A domain-containing protein 5A-like isoform X3 [Hippoglossus hippoglossus];XP_030248786.1//von Willebrand factor A domain-containing protein 5A-like isoform X1 [Sparus aurata]
SMAX5B_012302	CP026247.1	complement(8332335..8351287)	8.06778	1.79505	3.47027	0.000926149	0.0154707	1	protein_coding	K22282//fatty acid hydroxylase domain-containing protein 2;K22526//myocardin	XP_025246155.1//tumor necrosis factor alpha-induced protein 8-like protein 3 isoform X2 [Theropithecus gelada]
SMAX5B_004726	CP026247.1	complement(559864..565940)	23.7847	1.79144	3.4616	2.4183e-14	4.54341e-12	4.58872e-10	protein_coding	K22614//NLR family CARD domain-containing protein 3;K14026//SEL1 protein	AWP01030.1//putative verrucotoxin subunit beta-like [Scophthalmus maximus];XP_035484807.1//LOW QUALITY PROTEIN: uncharacterized protein LOC118302618 [Scophthalmus maximus]
SMAX5B_019442	CP026262.1	complement(2903190..2940183)	15.2761	1.7867	3.45026	4.35301e-06	0.000168488	0.0825984	protein_coding	K05157//tumor necrosis factor receptor superfamily member 21	AWP19625.1//putative tumor necrosis factor receptor superfamily member 21 [Scophthalmus maximus];XP_035473790.1//tumor necrosis factor receptor superfamily member 21 [Scophthalmus maximus]
SMAX5B_020368	CP026260.1	complement(9302638..9318631)	10.7275	1.78348	3.44256	2.8226e-06	0.000114278	0.0535588	protein_coding	K23335//glucose-induced degradation protein 4;K17934//NADPH oxidase organizer 1	AWP17416.1//putative NADPH oxidase organizer 1 [Scophthalmus maximus];XP_035469064.1//NADPH oxidase organizer 1-like [Scophthalmus maximus]
SMAX5B_012091	CP026243.1	complement(17335426..17355109)	159.337	1.77593	3.42458	1.29018e-07	7.41341e-06	0.00244811	protein_coding	K01873//valyl-tRNA synthetase [EC:6.1.1.9];K19607//X-linked retinitis pigmentosa GTPase regulator;K11669//INO80 complex subunit E	AWO96360.1//putative valine--tRNA ligase-like [Scophthalmus maximus];XP_035497532.1//uncharacterized protein LOC118314887 [Scophthalmus maximus];AWO96362.1//putative valine--tRNA ligase-like isoform 3 [Scophthalmus maximus];KAF0045548.1//hypothetical protein F2P81_002077 [Scophthalmus maximus];KAF3848322.1//hypothetical protein F7725_014819 [Dissostichus mawsoni];XP_022612291.1//valine--tRNA liga…
SMAX5B_022252	CP026254.1	4429030..4436137	324.101	1.77519	3.42282	4.58121e-11	4.72855e-09	8.69285e-07	protein_coding	K00681//gamma-glutamyltranspeptidase / glutathione hydrolase [EC:2.3.2.2 3.4.19.13];K13624//ceruloplasmin [EC:1.16.3.1]	KAF0041814.1//hypothetical protein F2P81_005346 [Scophthalmus maximus]
SMAX5B_010633	CP026244.1	21043384..21069502	13.2176	1.77507	3.42254	0.00138823	0.0213155	1	protein_coding	K15290//synaptotagmin-1	XP_035472354.1//synaptotagmin-1a isoform X1 [Scophthalmus maximus];XP_035472409.1//synaptotagmin-1a isoform X2 [Scophthalmus maximus]
SMAX5B_014744	CP026253.1	complement(19910082..19931967)	23.5466	1.77454	3.42129	0.00269377	0.0354108	1	protein_coding	K07374//tubulin alpha	AWP10071.1//Tubulin alpha-1B chain [Scophthalmus maximus];XP_028439768.1//tubulin alpha chain-like [Perca flavescens];XP_020505941.1//tubulin alpha chain-like [Labrus bergylta]
SMAX5B_001907	CP026263.1	complement(1901987..1903729)	10.457	1.7745	3.42118	0.00878897	0.0846546	1	protein_coding	NA	XP_018529300.1//PREDICTED: solute carrier family 35 member G2-like [Lates calcarifer];XP_035475675.1//solute carrier family 35 member G2b [Scophthalmus maximus]
SMAX5B_011294	CP026260.1	2585928..2593927	36.6971	1.77311	3.4179	8.63891e-10	7.11582e-08	1.63923e-05	protein_coding	K08180//MFS transporter, MCT family, solute carrier family 16 (monocarboxylic acid transporters), member 3	XP_035468652.1//monocarboxylate transporter 4 [Scophthalmus maximus]
SMAX5B_003049	CP026258.1	846815..847947	10.5753	1.77218	3.4157	0.000200186	0.00441963	1	protein_coding	K13172//serine/arginine repetitive matrix protein 2	XP_035464826.1//LOW QUALITY PROTEIN: immediate early response gene 5-like protein [Scophthalmus maximus]
SMAX5B_019751	CP026244.1	complement(201815..210034)	69.7718	1.77149	3.41406	7.43009e-13	1.08981e-10	1.40986e-08	protein_coding	K15176//RNA polymerase-associated protein CTR9;K18668//ribonuclease ZC3H12 [EC:3.1.-.-];K17498//transcription factor SPN1	AWO97207.1//putative NEDD4-binding protein 1-like [Scophthalmus maximus];XP_035473754.1//LOW QUALITY PROTEIN: protein KHNYN [Scophthalmus maximus]
SMAX5B_014061	CP026248.1	20312038..20315631	172.596	1.75875	3.38405	1.70977e-11	1.89332e-09	3.2443e-07	protein_coding	K13172//serine/arginine repetitive matrix protein 2	AWP03313.1//putative opioid growth factor receptor-like [Scophthalmus maximus];XP_035488115.1//opioid growth factor receptor-like protein 1 [Scophthalmus maximus]
SMAX5B_019974	CP026245.1	complement(7040155..7044012)	27.7854	1.75706	3.38009	4.73256e-05	0.00133897	0.898003	protein_coding	K08670//suppressor of tumorigenicity protein 14 [EC:3.4.21.109]	KAF0030116.1//hypothetical protein F2P81_016847 [Scophthalmus maximus]
SMAX5B_004268	CP026246.1	complement(12514204..12516630)	4.82211	1.75488	3.37497	0.00158072	0.0235993	1	protein_coding	NA	AWP00147.1//putative leucine-rich repeat neuronal protein 4-like [Scophthalmus maximus]
SMAX5B_018467	CP026256.1	complement(10413118..10420202)	64.1776	1.74637	3.35514	8.70313e-16	1.96655e-13	1.65142e-11	protein_coding	K04724//CASP8 and FADD-like apoptosis regulator	AWP12994.1//putative CASP8 and FADD-like apoptosis regulator [Scophthalmus maximus];XP_035460843.1//CASP8 and FADD-like apoptosis regulator isoform X1 [Scophthalmus maximus];XP_035460844.1//CASP8 and FADD-like apoptosis regulator isoform X2 [Scophthalmus maximus]
SMAX5B_003449	CP026259.1	15012129..15014757	361.043	1.74539	3.35286	3.02232e-09	2.2971e-07	5.73486e-05	protein_coding	K13536//MARCKS-related protein	XP_019940731.1//PREDICTED: MARCKS-related protein-like [Paralichthys olivaceus]
SMAX5B_013816	CP026258.1	complement(13579204..13596034)	21.748	1.73973	3.33972	2.3844e-05	0.000748021	0.452439	protein_coding	K10429//microtubule-associated protein 1	AWP15530.1//putative microtubule-associated protein 1B [Scophthalmus maximus]
SMAX5B_000394	CP026259.1	complement(12313443..12322299)	92.4413	1.73692	3.33324	1.16737e-05	0.000400509	0.221508	protein_coding	K16857//thrombospondin 1	KAF1374974.1//hypothetical protein PFLUV_G00234600 [Perca fluviatilis]
SMAX5B_012021	CP026243.1	21611843..21614016	641.124	1.7363	3.33179	1.95262e-07	1.06699e-05	0.0037051	protein_coding	K03115//casein kinase II subunit beta	TDH11938.1//hypothetical protein EPR50_G00066040 [Perca flavescens]
SMAX5B_014058	CP026248.1	complement(15060975..15078280)	50.6974	1.73497	3.32872	0.000464856	0.0088328	1	protein_coding	K17304//melanocyte protein PMEL	XP_031423007.1//melanocyte protein PMEL [Clupea harengus]
SMAX5B_007780	CP026244.1	16059004..16073301	114.278	1.73459	3.32785	6.51913e-14	1.13548e-11	1.237e-09	protein_coding	K03462//nicotinamide phosphoribosyltransferase [EC:2.4.2.12]	XP_013365989.1//PREDICTED: nicotinamide phosphoribosyltransferase [Chinchilla lanigera];XP_020042025.1//nicotinamide phosphoribosyltransferase isoform X1 [Castor canadensis];XP_035505590.1//nicotinamide phosphoribosyltransferase isoform X2 [Scophthalmus maximus];AWO98016.1//putative nicotinamide phosphoribosyltransferase [Scophthalmus maximus]
SMAX5B_014836	CP026253.1	18472797..18488684	19.7603	1.72826	3.31328	0.00204596	0.0288068	1	protein_coding	K06550//L1 cell adhesion molecule	XP_022622531.1//neural cell adhesion molecule L1.1-like isoform X3 [Seriola dumerili];XP_035501879.1//LOW QUALITY PROTEIN: neural cell adhesion molecule L1.1-like [Scophthalmus maximus];XP_022622530.1//neural cell adhesion molecule L1.1-like isoform X2 [Seriola dumerili]
SMAX5B_000737	CP026245.1	complement(19499838..19503645)	286.162	1.7275	3.31153	3.17953e-11	3.45227e-09	6.03316e-07	protein_coding	K02730//20S proteasome subunit alpha 1 [EC:3.4.25.1]	XP_030299458.1//proteasome subunit alpha type-6-like [Sparus aurata]
SMAX5B_002764	CP026251.1	complement(24535948..24536328)	25.6407	1.72483	3.30542	0.000993932	0.0164063	1	protein_coding	K11661//helicase SRCAP [EC:3.6.4.-];K19475//WAS/WASL-interacting protein	AWP07728.1//putative radiation-inducible immediate-early IEX-1 [Scophthalmus maximus]
SMAX5B_011490	CP026250.1	6033038..6037310	52.469	1.72036	3.29519	2.74085e-14	5.09219e-12	5.20076e-10	protein_coding	K23506//apoptogenic protein 1;K13172//serine/arginine repetitive matrix protein 2;K13171//serine/arginine repetitive matrix protein 1;K23829//TNFAIP3-interacting protein 1	AWP05367.1//putative TNFAIP3-interacting protein 2 [Scophthalmus maximus];XP_022594101.1//TNFAIP3-interacting protein 2 isoform X1 [Seriola dumerili]
SMAX5B_011144	CP026261.1	complement(17217025..17243273)	9.16605	1.71895	3.29197	0.00452355	0.0525997	1	protein_coding	K07858//Rho family GTPase 2	XP_035470097.1//rho-related GTP-binding protein RhoN [Scophthalmus maximus]
SMAX5B_008336	CP026262.1	5701145..5703551	391.501	1.71413	3.28099	7.4448e-09	5.25251e-07	0.000141265	protein_coding	K04734//NF-kappa-B inhibitor alpha	XP_035473865.1//nuclear factor of kappa light polypeptide gene enhancer in B-cells inhibitor, alpha a, partial [Scophthalmus maximus];AWP19725.1//I kappa B alpha [Scophthalmus maximus]
SMAX5B_001222	CP026263.1	14165034..14168675	555.576	1.71192	3.27596	6.98477e-07	3.27149e-05	0.0132536	protein_coding	K06697//proteasome activator subunit 2 (PA28 beta)	XP_035475482.1//proteasome activator complex subunit 2 [Scophthalmus maximus];AWP21086.1//Proteasome activator complex subunit 2 isoform 2 [Scophthalmus maximus]
SMAX5B_009809	CP026252.1	complement(9306946..9310782)	72.3122	1.70566	3.26179	1.43371e-09	1.15812e-07	2.72047e-05	protein_coding	K10335//ankyrin repeat and SOCS box protein 13	XP_035498995.1//ankyrin repeat and SOCS box protein 13-like [Scophthalmus maximus]
SMAX5B_002855	CP026262.1	19827106..19828206	4.98603	1.70367	3.25728	0.00657549	0.0688902	1	protein_coding	K08426//G protein-coupled receptor 132	XP_035474139.1//probable G-protein coupled receptor 132b [Scophthalmus maximus]
SMAX5B_017200	CP026245.1	complement(23528626..23529228)	39.709	1.68962	3.22572	9.94445e-06	0.000349571	0.188696	protein_coding	K18626//trichohyalin;K19410//inner nuclear membrane protein Man1;K17346//tetraspanin-33	XP_027901087.1//uncharacterized protein LOC114161736 [Xiphophorus couchianus];AWO99497.1//Hypothetical protein SMAX5B_017200 [Scophthalmus maximus];XP_035477850.1//uncharacterized protein LOC118298111 isoform X1 [Scophthalmus maximus]
SMAX5B_008072	CP026248.1	complement(1274385..1279210)	156.729	1.68716	3.22022	3.79488e-11	3.99083e-09	7.20079e-07	protein_coding	K06700//proteasome inhibitor subunit 1 (PI31)	XP_035486067.1//proteasome inhibitor PI31 subunit [Scophthalmus maximus]
SMAX5B_008194	CP026262.1	complement(4451627..4458869)	54.4217	1.68714	3.22018	0.00845843	0.0826613	1	protein_coding	K12012//tripartite motif-containing protein 35;K04381//stathmin	RVE55955.1//hypothetical protein OJAV_G00231480 [Oryzias javanicus]
SMAX5B_011595	CP026250.1	complement(3683308..3687890)	106.084	1.68705	3.21998	9.4685e-11	9.4804e-09	1.79665e-06	protein_coding	K22614//NLR family CARD domain-containing protein 3	AWP05253.1//putative NACHT LRR and PYD domains-containing protein 10-like [Scophthalmus maximus]
SMAX5B_015461	CP026252.1	23514812..23532789	14.1634	1.68486	3.2151	5.28381e-06	0.000200797	0.10026	protein_coding	K11140//aminopeptidase N [EC:3.4.11.2]	XP_035498418.1//aminopeptidase N-like [Scophthalmus maximus]
SMAX5B_013488	CP026245.1	14123492..14163662	20.6493	1.68191	3.20851	2.43117e-06	9.98811e-05	0.0461315	protein_coding	K05743//LIM domain kinase 1 [EC:2.7.11.1]	XP_035478889.1//LIM domain kinase 1a isoform X1 [Scophthalmus maximus];XP_035478891.1//LIM domain kinase 1a isoform X3 [Scophthalmus maximus]
SMAX5B_004061	CP026246.1	complement(14427895..14430377)	273.103	1.67679	3.19716	3.0038e-18	8.51296e-16	5.6997e-14	protein_coding	NA	AWP00307.1//Hypothetical protein SMAX5B_004061 [Scophthalmus maximus]
SMAX5B_004607	CP026260.1	complement(1760683..1776711)	38.428	1.67327	3.18937	2.35022e-05	0.000740076	0.445954	protein_coding	K15728//phosphatidate phosphatase LPIN [EC:3.1.3.4]	XP_035469085.1//phosphatidate phosphatase LPIN2-like isoform X1 [Scophthalmus maximus];AWP17078.1//putative phosphatidate phosphatase LPIN2-like [Scophthalmus maximus]
SMAX5B_014324	CP026248.1	18594107..18599225	19.3381	1.67112	3.18462	1.84887e-06	7.82659e-05	0.0350824	protein_coding	K14754//interferon-induced GTP-binding protein Mx1	AWP03232.1//Mx type 2 isoform 4 [Scophthalmus maximus];AWP03229.1//Mx type 2 [Scophthalmus maximus];AET87128.1//MxA protein [Dicentrarchus labrax]
SMAX5B_005299	CP026258.1	20612298..20616037	315.509	1.66607	3.17348	9.94364e-11	9.83832e-09	1.88681e-06	protein_coding	K23168//protein MPAN	AWP15818.1//Hypothetical protein SMAX5B_005299 [Scophthalmus maximus]
SMAX5B_005994	CP026261.1	6732854..6748998	1.13768	1.66546	3.17214	0.00864012	0.0838001	1	protein_coding	K17751//myosin heavy chain 6/7	XP_018523304.1//PREDICTED: myosin-16-like [Lates calcarifer];AWP18617.1//hypothetical protein SMAX5B_005994 [Scophthalmus maximus]
SMAX5B_002106	CP026243.1	complement(185177..222994)	7.83204	1.66124	3.16288	1.02068e-06	4.65809e-05	0.0193674	protein_coding	K19017//interphotoreceptor matrix proteoglycan 2	XP_018517497.1//PREDICTED: LOW QUALITY PROTEIN: interphotoreceptor matrix proteoglycan 2-like [Lates calcarifer];XP_035485724.1//interphotoreceptor matrix proteoglycan 2-like [Scophthalmus maximus];XP_027043110.1//uncharacterized protein LOC113671094 [Pocillopora damicornis];AWO95491.1//putative interphotoreceptor matrix proteoglycan 2-like [Scophthalmus maximus]
SMAX5B_020708	CP026261.1	complement(9494371..9498003)	61.2549	1.65922	3.15845	0.00726646	0.0742598	1	protein_coding	K19363//lipopolysaccharide-induced tumor necrosis factor-alpha factor	XP_035471924.1//LITAF domain-containing protein-like [Scophthalmus maximus]
SMAX5B_019136	CP026255.1	complement(18511632..18513476)	9.88012	1.65072	3.13989	0.0018398	0.026543	1	protein_coding	K08270//DNA-damage-inducible transcript 4	AWP12454.1//putative DNA damage-inducible transcript 4-like protein [Scophthalmus maximus]
SMAX5B_006618	CP026249.1	complement(13997275..14002992)	24.6732	1.64957	3.1374	0.00786814	0.0784515	1	protein_coding	K01540//sodium/potassium-transporting ATPase subunit beta	XP_035488974.1//sodium/potassium-transporting ATPase subunit beta-3-like isoform X1 [Scophthalmus maximus]
SMAX5B_005847	CP026249.1	12883503..12955329	21.6506	1.64872	3.13555	0.00435038	0.0510476	1	protein_coding	K22660//calsyntenin 2	AWP04277.1//putative calsyntenin-2-like [Scophthalmus maximus];KAF5164258.1//hypothetical protein HST_G00116200, partial [Hippoglossus stenolepis]
SMAX5B_020047	CP026261.1	complement(20199712..20202556)	198.648	1.64776	3.13347	1.62324e-16	4.11247e-14	3.08011e-12	protein_coding	K23677//MFS transporter, Spinster family, sphingosine-1-phosphate transporter;K23573//dentin sialophosphoprotein;K12160//small ubiquitin-related modifier	AWP19513.1//putative NFATC2-interacting protein [Scophthalmus maximus]
SMAX5B_004219	CP026246.1	complement(15514943..15520723)	21.0432	1.64328	3.12376	0.00204469	0.0288068	1	protein_coding	K13505//vesicle-associated membrane protein 3;K08514//vesicle-associated membrane protein 5;K08805//doublecortin-like kinase 1/2 [EC:2.7.11.1];K13504//vesicle-associated membrane protein 2;K04677//mothers against decapentaplegic homolog 6	XP_001747562.1//uncharacterized protein MONBRDRAFT_33199 [Monosiga brevicollis MX1];XP_035480544.1//vesicle-associated membrane protein 2 [Scophthalmus maximus];XP_001894106.1//Hypothetical 17.1 kDa protein in PUR5 3'region, partial [Brugia malayi]
SMAX5B_002748	CP026253.1	8068450..8157877	1.12474	1.63789	3.11211	0.00212911	0.0297417	1	protein_coding	K04602//cadherin EGF LAG seven-pass G-type receptor 3	XP_034446455.1//cadherin EGF LAG seven-pass G-type receptor 3 isoform X2 [Hippoglossus hippoglossus];AWP09379.1//putative cadherin EGF LAG seven-pass G-type receptor 3 [Scophthalmus maximus]
SMAX5B_021923	CP026259.1	complement(5116404..5126803)	42.7919	1.63588	3.10778	7.33888e-05	0.0019351	1	protein_coding	K05618//solute carrier family 1 (glutamate transporter), member 7	AWP16233.1//Amino acid transporter [Scophthalmus maximus]
SMAX5B_010189	CP026245.1	complement(18429541..18431391)	15.4984	1.6353	3.10652	0.0012653	0.0198101	1	protein_coding	K23573//dentin sialophosphoprotein	XP_035478856.1//secretogranin-2 [Scophthalmus maximus]
SMAX5B_004483	CP026244.1	complement(1375644..1378698)	75.7923	1.63068	3.0966	3.27053e-08	2.10333e-06	0.000620583	protein_coding	K01446//peptidoglycan recognition protein	XP_035506679.1//uncharacterized protein LOC118319988 isoform X4 [Scophthalmus maximus];XP_035506672.1//uncharacterized protein LOC118319988 isoform X3 [Scophthalmus maximus];XP_001742455.1//uncharacterized protein MONBRDRAFT_31054 [Monosiga brevicollis MX1];XP_035506685.1//uncharacterized protein LOC118319988 isoform X5 [Scophthalmus maximus];AWO97326.1//putative lysozyme g-like [Scophthalmus max…
SMAX5B_014508	CP026253.1	19917660..19924345	118.665	1.63028	3.09572	0.00626931	0.0664949	1	protein_coding	K07374//tubulin alpha	XP_017306538.1//PREDICTED: tubulin alpha-1A chain-like [Ictalurus punctatus];XP_034959794.1//tubulin alpha-1A chain-like [Zootoca vivipara];AWP10073.1//Tubulin alpha-1B chain [Scophthalmus maximus]
SMAX5B_012849	CP026261.1	17909064..17914686	37.5511	1.6269	3.08849	4.21216e-06	0.000164176	0.0799257	protein_coding	K10874//RAD52 motif-containing protein 1	XP_035471594.1//RAD52 motif-containing protein 1 isoform X1 [Scophthalmus maximus]
SMAX5B_011105	CP026264.1	complement(13772563..13784282)	285.818	1.62618	3.08695	8.10326e-08	4.85644e-06	0.00153759	protein_coding	K05768//gelsolin	AWP21903.1//putative adseverin-like [Scophthalmus maximus];XP_035476380.1//adseverin [Scophthalmus maximus]
SMAX5B_008569	CP026257.1	16244984..16245319	19.7345	1.62439	3.08312	0.00755876	0.0763224	1	protein_coding	#N/A	#N/A
SMAX5B_018620	CP026256.1	15744931..15748982	81.3522	1.62373	3.0817	2.47816e-13	3.94641e-11	4.70231e-09	protein_coding	K23310//PHD finger protein 6	XP_035507079.1//actin cytoskeleton-regulatory complex protein PAN1 isoform X2 [Scophthalmus maximus];KAF0026626.1//hypothetical protein F2P81_021363 [Scophthalmus maximus];AWP13355.1//putative suppressor protein SRP40-like [Scophthalmus maximus]
SMAX5B_018196	CP026256.1	complement(12984493..12988987)	49.5665	1.61602	3.06527	3.47994e-09	2.59768e-07	6.60319e-05	protein_coding	K04400//caspase 10 [EC:3.4.22.63]	XP_035507180.1//caspase-8 isoform X2 [Scophthalmus maximus]
SMAX5B_012910	CP026246.1	complement(28178160..28192228)	3.23282	1.60956	3.05158	0.00331363	0.0414105	1	protein_coding	K18405//tudor domain-containing protein 1/4/6/7	XP_035482446.1//tudor domain-containing protein 7B isoform X3 [Scophthalmus maximus];AWP00866.1//putative tudor domain-containing protein 7B-like [Scophthalmus maximus]
SMAX5B_014757	CP026253.1	complement(11542340..11544321)	16.1516	1.60701	3.0462	0.000354384	0.0070966	1	protein_coding	K03283//heat shock 70kDa protein 1/2/6/8	XP_035500186.1//heat shock 70 kDa protein 1B [Scophthalmus maximus]
SMAX5B_009037	CP026259.1	complement(2839070..2846875)	53.9955	1.60389	3.03963	1.12801e-12	1.57179e-10	2.1404e-08	protein_coding	K12317//neutral alpha-glucosidase C [EC:3.2.1.20]	XP_018521784.1//PREDICTED: neutral alpha-glucosidase C isoform X1 [Lates calcarifer]
SMAX5B_006770	CP026246.1	complement(6814197..6833603)	9.82897	1.59548	3.02196	1.5793e-07	8.80251e-06	0.00299673	protein_coding	K20632//deleted in liver cancer protein	AWO99922.1//putative stAR-related lipid transfer protein 13-like [Scophthalmus maximus];XP_035481320.1//stAR-related lipid transfer protein 13-like isoform X3 [Scophthalmus maximus];XP_035481319.1//stAR-related lipid transfer protein 13-like isoform X2 [Scophthalmus maximus]
SMAX5B_003587	CP026243.1	15134721..15137747	116.146	1.59219	3.01506	9.10996e-11	9.17636e-09	1.72861e-06	protein_coding	K12799//apoptosis-associated speck-like protein containing a CARD	XP_035494326.1//apoptosis-associated speck-like protein containing a CARD [Scophthalmus maximus]
SMAX5B_015674	CP026264.1	1695597..1698419	334.568	1.59218	3.01504	6.33373e-08	3.87935e-06	0.00120183	protein_coding	K02740//20S proteasome subunit beta 8 [EC:3.4.25.1]	AWP21249.1//Proteasome subunit beta type isoform 2 [Scophthalmus maximus];KAF0024227.1//hypothetical protein F2P81_023029 [Scophthalmus maximus];AWP21248.1//Proteasome subunit beta type [Scophthalmus maximus]
SMAX5B_006329	CP026261.1	complement(6414239..6427028)	136.312	1.59101	3.0126	2.35981e-08	1.56581e-06	0.000447775	protein_coding	K17768//mitochondrial import receptor subunit TOM70;K19870//sperm-associated antigen 1	XP_035470231.1//zinc finger CCCH domain-containing protein 7B-like isoform X2 [Scophthalmus maximus];AWP18587.1//putative zinc finger CCCH domain-containing protein 7B-like [Scophthalmus maximus]
SMAX5B_002998	CP026258.1	complement(800589..803607)	242.147	1.58169	2.99321	1.5155e-09	1.2183e-07	2.87566e-05	protein_coding	K02739//20S proteasome subunit beta 2 [EC:3.4.25.1]	XP_035464281.1//proteasome subunit beta type-10 [Scophthalmus maximus]
SMAX5B_012012	CP026243.1	21609910..21610983	978.872	1.56941	2.96783	4.3479e-06	0.000168488	0.0825014	protein_coding	K18617//allograft inflammatory factor 1	XP_035485211.1//allograft inflammatory factor 1-like [Scophthalmus maximus]
SMAX5B_001868	CP026263.1	9851010..9857051	97.8061	1.56899	2.96698	9.21575e-12	1.0776e-09	1.74869e-07	protein_coding	K04415//mitogen-activated protein kinase kinase kinase 8 [EC:2.7.11.25]	XP_035475066.1//mitogen-activated protein kinase kinase kinase 8 [Scophthalmus maximus]
SMAX5B_019229	CP026255.1	2509587..2518135	18.9581	1.56688	2.96263	0.00326655	0.0408832	1	protein_coding	K15294//complexin-1/2	OMJ71518.1//hypothetical protein SteCoe_30247 [Stentor coeruleus];XP_027705452.1//complexin-1-like [Vombatus ursinus]
SMAX5B_004606	CP026260.1	1717468..1759694	94.214	1.56487	2.9585	1.34346e-06	5.91912e-05	0.0254921	protein_coding	K23113//structural maintenance of chromosomes flexible hinge domain-containing protein 1	XP_035469078.1//structural maintenance of chromosomes flexible hinge domain-containing protein 1 isoform X4 [Scophthalmus maximus];AWP17077.1//putative structural maintenance of chromosomes flexible hinge domain-containing protein 1 isoform 2 [Scophthalmus maximus];AWP17076.1//putative structural maintenance of chromosomes flexible hinge domain-containing protein 1 [Scophthalmus maximus]
SMAX5B_007826	CP026244.1	18654488..18784970	7.3712	1.5648	2.95837	7.75052e-06	0.000283581	0.147066	protein_coding	K04858//voltage-dependent calcium channel alpha-2/delta-1;K16882//protein piccolo	XP_035471536.1//LOW QUALITY PROTEIN: protein piccolo [Scophthalmus maximus];XP_035472066.1//voltage-dependent calcium channel subunit alpha-2/delta-1-like isoform X1 [Scophthalmus maximus];XP_035472083.1//voltage-dependent calcium channel subunit alpha-2/delta-1-like isoform X3 [Scophthalmus maximus];AWO98105.1//putative protein piccolo-like [Scophthalmus maximus]
SMAX5B_011553	CP026250.1	6326032..6349106	5.45153	1.55804	2.94454	4.06474e-05	0.00119031	0.771284	protein_coding	K21952//CASK-interacting protein	XP_028314765.1//caskin-1-like isoform X1 [Gouania willdenowi];AWP05390.1//putative caskin-1-like [Scophthalmus maximus];XP_026159484.1//caskin-1-like isoform X1 [Mastacembelus armatus]
SMAX5B_014064	CP026248.1	complement(18756486..18797544)	4.4056	1.55754	2.94351	1.9069e-05	0.00061436	0.361834	protein_coding	K08624//a disintegrin and metalloproteinase with thrombospondin motifs 9 [EC:3.4.24.-]	AWP03241.1//putative disintegrin and metalloproteinase with thrombospondin motifs 9 [Scophthalmus maximus]
SMAX5B_018166	CP026256.1	5482893..5491604	106.809	1.55682	2.94206	8.08646e-08	4.85644e-06	0.00153441	protein_coding	K15260//poly [ADP-ribose] polymerase 9 [EC:2.4.2.30]	XP_035031168.1//protein mono-ADP-ribosyltransferase PARP9 [Hippoglossus stenolepis];XP_035460346.1//protein mono-ADP-ribosyltransferase PARP9 isoform X1 [Scophthalmus maximus];AWP12807.1//putative poly [Scophthalmus maximus];XP_035460347.1//protein mono-ADP-ribosyltransferase PARP9 isoform X2 [Scophthalmus maximus];AWP12809.1//putative poly isoform 3 [Scophthalmus maximus]
SMAX5B_005112	CP026252.1	5154548..5155719	30.9388	1.55402	2.93635	8.45555e-05	0.00216849	1	protein_coding	NA	XP_035499244.1//uncharacterized protein C11orf96 homolog [Scophthalmus maximus]
SMAX5B_006118	CP026249.1	8001821..8021903	5.847	1.55255	2.93336	2.15514e-05	0.0006864	0.408937	protein_coding	K10352//myosin heavy chain;K12875//apoptotic chromatin condensation inducer in the nucleus;K16464//centrosomal protein CEP250;K20283//golgin subfamily A member 4;K18626//trichohyalin;K10388//plectin;K12478//early endosome antigen 1;K20478//golgin subfamily B member 1	AWP03965.1//putative coiled-coil domain-containing protein 178 [Scophthalmus maximus];AWP03969.1//putative coiled-coil domain-containing protein 178 isoform 5 [Scophthalmus maximus];AWP03968.1//putative coiled-coil domain-containing protein 178 isoform 4 [Scophthalmus maximus];AWP03970.1//putative coiled-coil domain-containing protein 178 isoform 6 [Scophthalmus maximus]
SMAX5B_020346	CP026260.1	7616838..7618987	19.638	1.55149	2.9312	0.000346049	0.00696303	1	protein_coding	K08148//MFS transporter, SP family, solute carrier family 2 (facilitated glucose transporter), member 11	XP_034426664.1//solute carrier family 2, facilitated glucose transporter member 11-like [Hippoglossus hippoglossus];QCL11562.1//glucose transporter 11d [Lateolabrax maculatus];XP_035469471.1//solute carrier family 2, facilitated glucose transporter member 11-like [Scophthalmus maximus]
SMAX5B_019347	CP026251.1	complement(22414719..22419121)	6.1096	1.54801	2.92414	0.00691289	0.0715287	1	protein_coding	K19941//synapsin;K21125//mucin-5AC;K17582//antigen KI-67;K03626//nascent polypeptide-associated complex subunit alpha	XP_035494758.1//cilia- and flagella-associated protein 157-like [Scophthalmus maximus];AWP07627.1//Hypothetical protein SMAX5B_019347 [Scophthalmus maximus]
SMAX5B_020484	CP026254.1	3326541..3328118	228.244	1.54626	2.9206	2.20591e-11	2.41079e-09	4.18572e-07	protein_coding	K16449//regulator of G-protein signaling	AWP10548.1//Regulator of G-protein signaling 1 [Scophthalmus maximus];XP_029285660.1//regulator of G-protein signaling 21-like isoform X1 [Cottoperca gobio]
SMAX5B_011185	CP026261.1	16738524..16740181	19.1156	1.54555	2.91915	0.000338558	0.00683699	1	protein_coding	K23791//sesquipedalian	AWP19290.1//putative sesquipedalian-1-like [Scophthalmus maximus]
SMAX5B_015731	CP026264.1	complement(3738941..3746875)	45.2094	1.54321	2.91443	3.21949e-09	2.42491e-07	6.10898e-05	protein_coding	NA	XP_035476383.1//transmembrane protein 268 [Scophthalmus maximus];AWP21370.1//putative transmembrane protein C9orf91 -like [Scophthalmus maximus]
SMAX5B_021634	CP026244.1	4380062..4381283	67.1868	1.54232	2.91262	9.00495e-05	0.00229881	1	protein_coding	K10030//interleukin 8	XP_035465019.1//interleukin-8-like [Scophthalmus maximus]
SMAX5B_011140	CP026261.1	16668128..16670751	18.6585	1.53752	2.90294	2.9885e-05	0.000917349	0.567067	protein_coding	K07818//perforin 1	AWP19279.1//Perforin-1-like [Scophthalmus maximus]
SMAX5B_020648	CP026260.1	19444671..19451822	127.102	1.53624	2.90038	2.88151e-09	2.20008e-07	5.46767e-05	protein_coding	K21348//calcium-binding and coiled-coil domain-containing protein 2	AWP18092.1//Tax1-binding protein 1 -like B [Scophthalmus maximus]
SMAX5B_005306	CP026258.1	19449163..19452148	27.5357	1.53154	2.89095	6.10584e-05	0.00165471	1	protein_coding	K06707//B- and T-lymphocyte attenuator	AWP15744.1//Hypothetical protein SMAX5B_005306 [Scophthalmus maximus]
SMAX5B_021252	CP026251.1	4000548..4002821	20.6087	1.529	2.88585	0.00112646	0.0181285	1	protein_coding	K06058//deltex [EC:2.3.2.27]	XP_001744502.1//uncharacterized protein MONBRDRAFT_24242 [Monosiga brevicollis MX1];AWP06612.1//putative E3 ubiquitin-protein ligase DTX3L-like [Scophthalmus maximus]
SMAX5B_008133	CP026262.1	8052033..8065068	31.1779	1.52496	2.87778	6.09121e-09	4.37129e-07	0.000115581	protein_coding	K04079//molecular chaperone HtpG	AWP19820.1//Heat shock protein HSP 90-alpha 1 [Scophthalmus maximus]
SMAX5B_014718	CP026253.1	15565153..15571464	86.7026	1.52455	2.87698	4.86095e-14	8.6468e-12	9.22365e-10	protein_coding	K15697//RING finger protein 114 [EC:2.3.2.27]	XP_035500387.1//E3 ubiquitin-protein ligase RNF114 [Scophthalmus maximus]
SMAX5B_001859	CP026263.1	7088777..7118075	592.229	1.52305	2.87399	3.18328e-06	0.000126732	0.0604027	protein_coding	K06696//proteasome activator subunit 1 (PA28 alpha)	AWP20849.1//Proteasome activator complex subunit 1 isoform 3 [Scophthalmus maximus];XP_035474487.1//proteasome activator complex subunit 1 [Scophthalmus maximus]
SMAX5B_011683	CP026243.1	16313296..16332538	14.8011	1.50818	2.8445	0.000396166	0.00772962	1	protein_coding	K06783//cell adhesion molecule 4	XP_033497202.1//cell adhesion molecule 4 isoform X4 [Epinephelus lanceolatus];TMS10363.1//Cell adhesion molecule 4, partial [Larimichthys crocea];XP_028986413.1//cell adhesion molecule 4 isoform X4 [Betta splendens];AWO96290.1//putative cell adhesion molecule 4 [Scophthalmus maximus];XP_019949026.1//PREDICTED: cell adhesion molecule 4 isoform X5 [Paralichthys olivaceus];XP_035489813.1//cell adhes…
SMAX5B_018872	CP026246.1	991439..993233	24.1835	1.50547	2.83917	8.37505e-05	0.00215114	1	protein_coding	K04269//P2Y purinoceptor 2;K04271//P2Y purinoceptor 4	XP_035480396.1//P2Y purinoceptor 3 [Scophthalmus maximus]
SMAX5B_014287	CP026248.1	14670024..14676173	187.847	1.50181	2.83199	5.33174e-07	2.58412e-05	0.010117	protein_coding	K06058//deltex [EC:2.3.2.27]	AWP02984.1//putative E3 ubiquitin-protein ligase DTX3L-like isoform 3 [Scophthalmus maximus];AWP02985.1//putative E3 ubiquitin-protein ligase DTX3L-like isoform 4 [Scophthalmus maximus];AWP02983.1//putative E3 ubiquitin-protein ligase DTX3L-like isoform 2 [Scophthalmus maximus]
SMAX5B_018603	CP026256.1	complement(11527541..11537910)	67.5608	1.49779	2.82409	2.35509e-13	3.78648e-11	4.46878e-09	protein_coding	K12647//interferon-induced helicase C domain-containing protein 1 [EC:3.6.4.13]	AWP13063.1//Melanoma differentiation-associated protein 5 isoform 2 [Scophthalmus maximus];AWP13062.1//Melanoma differentiation-associated protein 5 [Scophthalmus maximus]
SMAX5B_004191	CP026246.1	8825052..8842636	11.3204	1.49667	2.82191	2.84386e-06	0.00011486	0.0539622	protein_coding	K01897//long-chain acyl-CoA synthetase [EC:6.2.1.3]	XP_029303622.1//long-chain-fatty-acid--CoA ligase 6 [Cottoperca gobio]
SMAX5B_008474	CP026245.1	3406623..3459377	73.8478	1.49249	2.81374	1.93387e-12	2.58689e-10	3.66951e-08	protein_coding	K14539//large subunit GTPase 1 [EC:3.6.1.-];K23028//cytospin;K10314//F-box protein 39;K08058//TAP binding protein (tapasin)	XP_035478019.1//smoothelin, like [Scophthalmus maximus];XP_035478020.1//tapasin-related protein [Scophthalmus maximus];AWO98505.1//putative smoothelin-like protein 2 [Scophthalmus maximus]
SMAX5B_015715	CP026264.1	8779777..8781787	80.7961	1.49062	2.81009	4.51816e-08	2.81896e-06	0.00085732	protein_coding	NA	AWP21675.1//putative receptor-transporting protein 4 [Scophthalmus maximus]
SMAX5B_017536	CP026243.1	complement(6005608..6008998)	33.9128	1.47933	2.7882	3.27148e-05	0.000990987	0.620764	protein_coding	K04271//P2Y purinoceptor 4	XP_029311024.1//LOW QUALITY PROTEIN: P2Y purinoceptor 3-like [Cottoperca gobio];AWO95810.1//P2Y purinoceptor 3 [Scophthalmus maximus]
SMAX5B_015981	CP026259.1	19929621..19934919	301.847	1.47872	2.78702	1.47243e-05	0.000490802	0.279393	protein_coding	K01581//ornithine decarboxylase [EC:4.1.1.17]	XP_035466069.1//ornithine decarboxylase [Scophthalmus maximus]
SMAX5B_012818	CP026252.1	18981794..18987551	61.5821	1.47542	2.78065	5.35327e-10	4.68649e-08	1.01578e-05	protein_coding	K15259//poly [ADP-ribose] polymerase 7/11/12/13 [EC:2.4.2.30]	AWP08789.1//putative poly isoform 2 [Scophthalmus maximus];XP_035498505.1//protein mono-ADP-ribosyltransferase PARP12 isoform X1 [Scophthalmus maximus];XP_035498507.1//protein mono-ADP-ribosyltransferase PARP12 isoform X2 [Scophthalmus maximus]
SMAX5B_015957	CP026243.1	complement(12314476..12332944)	26.8156	1.46697	2.7644	1.54046e-05	0.000511072	0.292302	protein_coding	NA	XP_035466758.1//uncharacterized protein si:dkey-16j16.4 [Scophthalmus maximus]
SMAX5B_000099	CP026262.1	complement(18278473..18286103)	160.06	1.45706	2.74547	2.2142e-06	9.14162e-05	0.0420144	protein_coding	K01128//sphingomyelin phosphodiesterase acid-like 3 [EC:3.1.4.-]	XP_035473975.1//acid sphingomyelinase-like phosphodiesterase 3a [Scophthalmus maximus];AWP20405.1//putative acid sphingomyelinase-like phosphodiesterase 3a [Scophthalmus maximus]
SMAX5B_022591	CP026254.1	16871752..16927286	88.8384	1.45298	2.73774	3.49227e-08	2.22031e-06	0.000662659	protein_coding	K10955//mucin-2;K23573//dentin sialophosphoprotein	AWP11178.1//putative protein strawberry notch -like 2 isoform 2 [Scophthalmus maximus];XP_035502453.1//LOW QUALITY PROTEIN: protein strawberry notch homolog 2 [Scophthalmus maximus];XP_019936708.1//PREDICTED: protein strawberry notch homolog 2 isoform X4 [Paralichthys olivaceus]
SMAX5B_011850	CP026243.1	complement(23473386..23482434)	4.12406	1.45193	2.73574	0.00960522	0.089977	1	protein_coding	K13517//lysophospholipid acyltransferase 1/2 [EC:2.3.1.51 2.3.1.-]	XP_035485662.1//lysophospholipid acyltransferase 1 isoform X1 [Scophthalmus maximus]
SMAX5B_022484	CP026254.1	complement(7906994..7924705)	99.8598	1.45122	2.7344	1.09046e-12	1.54522e-10	2.06915e-08	protein_coding	NA	AWP10743.1//putative interferon-induced protein 44-like [Scophthalmus maximus]
SMAX5B_006668	CP026261.1	4981021..4989788	9.22881	1.44792	2.72815	3.11307e-05	0.000951622	0.590706	protein_coding	K05843//transforming growth factor, beta receptor III	AWP18474.1//putative transforming growth factor beta receptor type 3-like [Scophthalmus maximus]
SMAX5B_017390	CP026260.1	complement(15445754..15458838)	9.10554	1.44589	2.7243	0.00276123	0.0362122	1	protein_coding	K08106//N-acetylgalactosamine 4-sulfate 6-O-sulfotransferase [EC:2.8.2.33]	XP_035468202.1//carbohydrate sulfotransferase 15-like [Scophthalmus maximus]
SMAX5B_022734	CP026247.1	complement(24671592..24679041)	12.0858	1.44475	2.72216	6.58876e-05	0.00176273	1	protein_coding	K08452//adhesion G-protein coupled receptor G3	XP_035485100.1//adhesion G protein-coupled receptor G3-like isoform X1 [Scophthalmus maximus];AWP02011.1//putative G-protein coupled receptor 56-like [Scophthalmus maximus];XP_035485101.1//adhesion G protein-coupled receptor G3-like isoform X2 [Scophthalmus maximus]
SMAX5B_014033	CP026248.1	19652544..19661257	21.9022	1.43851	2.71041	1.11191e-06	4.99792e-05	0.0210985	protein_coding	K19014//inter-alpha-trypsin inhibitor heavy chain H1	AWP03265.1//putative inter-alpha-trypsin inhibitor heavy chain H3-like [Scophthalmus maximus];XP_035488400.1//inter-alpha-trypsin inhibitor heavy chain H3-like [Scophthalmus maximus]
SMAX5B_012290	CP026243.1	6300873..6314974	9.48247	1.43358	2.70115	4.4286e-05	0.00127017	0.840327	protein_coding	K05115//AXL receptor tyrosine kinase [EC:2.7.10.1];K05103//Eph receptor A2 [EC:2.7.10.1];K05104//Eph receptor A3 [EC:2.7.10.1]	AWO95831.1//putative tyrosine-protein kinase Mer-like [Scophthalmus maximus];XP_035485641.1//tyrosine-protein kinase receptor TYRO3 isoform X1 [Scophthalmus maximus]
SMAX5B_004226	CP026246.1	complement(16966812..16971019)	128.938	1.43226	2.69869	0.00533491	0.0588398	1	protein_coding	K04455//heat shock protein beta-1	XP_033490310.1//heat shock protein beta-1 [Epinephelus lanceolatus]
SMAX5B_017414	CP026260.1	16639253..16647643	10.2291	1.43207	2.69833	3.6301e-05	0.00108005	0.688812	protein_coding	K06236//collagen, type I, alpha;K03626//nascent polypeptide-associated complex subunit alpha	XP_035469388.1//cerebellar degeneration-related protein 2-like isoform X1 [Scophthalmus maximus]
SMAX5B_000479	CP026259.1	complement(9255281..9284340)	7.62848	1.43127	2.69683	3.21731e-05	0.000979903	0.610485	protein_coding	K10358//myosin VI	XP_022606591.1//unconventional myosin-VI-like [Seriola dumerili]
SMAX5B_004996	CP026243.1	28665063..28669992	60.8558	1.42881	2.69224	2.71909e-07	1.43879e-05	0.00515947	protein_coding	K19721//collagen, type V/XI/XXIV/XXVII, alpha	XP_020623612.1//uncharacterized protein LOC110061116 [Orbicella faveolata]
SMAX5B_008715	CP026261.1	16001449..16005913	54.2446	1.42711	2.68908	9.33608e-09	6.55918e-07	0.000177152	protein_coding	K12649//ATP-dependent RNA helicase DHX58 [EC:3.6.4.13]	AWP19233.1//DExD/H box RNA helicase [Scophthalmus maximus]
SMAX5B_014487	CP026253.1	complement(20623033..20679836)	24.1348	1.42312	2.68164	4.48209e-11	4.68406e-09	8.50477e-07	protein_coding	K19464//pleckstrin homology domain-containing family G member 5	AWP10125.1//putative pleckstrin -likey domain-containing family G member 5 [Scophthalmus maximus];XP_030279964.1//LOW QUALITY PROTEIN: pleckstrin homology domain-containing family G member 5 [Sparus aurata];XP_027144067.1//pleckstrin homology domain-containing family G member 5 isoform X5 [Larimichthys crocea]
SMAX5B_017989	CP026257.1	complement(4286307..4293506)	109.866	1.42279	2.68103	7.47412e-11	7.62041e-09	1.41821e-06	protein_coding	K04390//tumor necrosis factor receptor superfamily member 6	XP_035461411.1//tumor necrosis factor receptor superfamily member 6 [Scophthalmus maximus]
SMAX5B_014127	CP026248.1	19865365..19894136	10.596	1.42088	2.67749	2.682e-06	0.00010938	0.0508909	protein_coding	K10408//dynein heavy chain, axonemal	XP_018535562.1//PREDICTED: LOW QUALITY PROTEIN: dynein heavy chain 1, axonemal-like [Lates calcarifer]
SMAX5B_012715	CP026247.1	complement(9474689..9486710)	39.4228	1.4204	2.67659	2.61997e-08	1.71127e-06	0.000497139	protein_coding	K05464//growth arrest-specific 6	AWP01416.1//putative growth arrest-specific protein 6 [Scophthalmus maximus]
SMAX5B_011215	CP026261.1	17159170..17182315	6.89109	1.41994	2.67575	0.000136189	0.00323347	1	protein_coding	K06560//mannose receptor, C type	AWP19321.1//putative C-type mannose receptor 2 [Scophthalmus maximus]
SMAX5B_020627	CP026260.1	18803345..18830530	54.5909	1.41889	2.67379	2.56114e-08	1.67941e-06	0.000485977	protein_coding	K15592//ets translocation variant 4	XP_028688756.1//mucin-2 [Macaca mulatta];XP_023123694.1//ETS translocation variant 4 isoform X4 [Amphiprion ocellaris]
SMAX5B_005161	CP026248.1	complement(7919697..7930655)	40.0299	1.41798	2.67211	2.79098e-08	1.80884e-06	0.000529589	protein_coding	K10630//RanBP-type and C3HC4-type zinc finger-containing protein 1 [EC:2.3.2.31]	AWP02513.1//RanBP-type and C3HC4-type zinc finger-containing protein 1 isoform 2 [Scophthalmus maximus];AWP02512.1//RanBP-type and C3HC4-type zinc finger-containing protein 1 [Scophthalmus maximus]
SMAX5B_001711	CP026263.1	2219823..2235689	258.387	1.41661	2.66957	1.6093e-06	6.9175e-05	0.0305365	protein_coding	K01880//glycyl-tRNA synthetase [EC:6.1.1.14]	XP_035474760.1//glycine--tRNA ligase-like [Scophthalmus maximus];AWP20605.1//Glycyl-tRNA synthetase [Scophthalmus maximus];KAF0028066.1//hypothetical protein F2P81_019153 [Scophthalmus maximus]
SMAX5B_008352	CP026262.1	complement(9972698..9975361)	71.1845	1.41651	2.66939	1.73255e-07	9.51628e-06	0.00328751	protein_coding	K12012//tripartite motif-containing protein 35	XP_035472563.1//zinc-binding protein A33-like isoform X1 [Scophthalmus maximus];AWP19926.1//putative tripartite motif-containing protein 35-like [Scophthalmus maximus]
SMAX5B_017412	CP026260.1	16625341..16627533	13.8693	1.41298	2.66286	7.79966e-05	0.00203143	1	protein_coding	K12015//tripartite motif-containing protein 39 [EC:2.3.2.27]	KAF0025625.1//hypothetical protein F2P81_022506 [Scophthalmus maximus];AWP17945.1//putative zinc finger protein RFP-like [Scophthalmus maximus]
SMAX5B_011272	CP026248.1	complement(25920124..25942422)	25.2395	1.4115	2.66013	8.43262e-06	0.000303312	0.160009	protein_coding	K03462//nicotinamide phosphoribosyltransferase [EC:2.4.2.12]	AWP03508.1//Nicotinamide phosphoribosyltransferase [Scophthalmus maximus]
SMAX5B_006559	CP026261.1	complement(5106676..5107723)	53.9018	1.41144	2.66003	6.59618e-06	0.000246194	0.125163	protein_coding	K09028//transcription factor jun-B	AWP18483.1//putative transcription factor jun-B-like [Scophthalmus maximus]
SMAX5B_009601	CP026264.1	complement(10869864..10928158)	85.096	1.41032	2.65796	6.0312e-09	4.34688e-07	0.000114442	protein_coding	K04576//calcitonin receptor;K23087//tissue factor pathway inhibitor 2	XP_035476203.1//LOW QUALITY PROTEIN: calcitonin gene-related peptide type 1 receptor [Scophthalmus maximus];AWP21805.1//putative calcitonin gene-related peptide type 1 receptor-like [Scophthalmus maximus];XP_035476204.1//LOW QUALITY PROTEIN: tissue factor pathway inhibitor 2 [Scophthalmus maximus]
SMAX5B_017371	CP026260.1	complement(13917805..13919266)	286.867	1.40679	2.65147	0.00317581	0.0401078	1	protein_coding	K00553//phenylethanolamine N-methyltransferase [EC:2.1.1.28]	AWP17777.1//putative phenylethanolamine N-methyltransferase [Scophthalmus maximus]
SMAX5B_016883	CP026257.1	10993843..11001405	163.14	1.40643	2.65081	3.82209e-07	1.93664e-05	0.00725241	protein_coding	K16195//eukaryotic translation initiation factor 2-alpha kinase 2 [EC:2.7.11.1]	AWP14248.1//DsRNA-dependent protein kinase isoform 2 [Scophthalmus maximus];XP_035461033.1//interferon-induced, double-stranded RNA-activated protein kinase [Scophthalmus maximus];AWP14247.1//DsRNA-dependent protein kinase [Scophthalmus maximus]
SMAX5B_011064	CP026251.1	8247401..8251253	95.1172	1.40634	2.65064	4.34498e-09	3.18651e-07	8.24461e-05	protein_coding	K06676//condensin complex subunit 2;K19194//AT-rich interactive domain-containing protein 4A;K07874//Ras-related protein Rab-1A;K23573//dentin sialophosphoprotein;K00844//hexokinase [EC:2.7.1.1];K19195//AT-rich interactive domain-containing protein 4B	AWP06814.1//putative AT-rich interactive domain-containing protein 5A [Scophthalmus maximus];XP_035495839.1//AT-rich interactive domain-containing protein 5A [Scophthalmus maximus]
SMAX5B_018708	CP026244.1	complement(23054700..23058610)	7.93864	1.40588	2.64979	0.000958171	0.0159102	1	protein_coding	K10298//F-box protein 15	AWO98321.1//putative F-box only protein 15-like [Scophthalmus maximus];KAF0028777.1//hypothetical protein F2P81_017882 [Scophthalmus maximus]
SMAX5B_016823	CP026257.1	11002848..11017832	48.4489	1.40152	2.64179	3.41434e-08	2.17906e-06	0.000647872	protein_coding	K16195//eukaryotic translation initiation factor 2-alpha kinase 2 [EC:2.7.11.1]	XP_035461026.1//interferon-induced, double-stranded RNA-activated protein kinase-like isoform X3 [Scophthalmus maximus];AWP14250.1//Double-stranded RNA-dependent protein kinase [Scophthalmus maximus];XP_035461025.1//interferon-induced, double-stranded RNA-activated protein kinase-like isoform X2 [Scophthalmus maximus]
SMAX5B_001046	CP026254.1	138227..141122	12.6005	1.3986	2.63645	0.00153034	0.0230322	1	protein_coding	K16519//A-kinase anchor protein 2	AWP10421.1//putative paralemmin-1 [Scophthalmus maximus]
SMAX5B_009232	CP026254.1	1401725..1408223	77.7631	1.39505	2.62998	3.4391e-13	5.37432e-11	6.52569e-09	protein_coding	K08601//ubiquitin carboxyl-terminal hydrolase CYLD [EC:3.4.19.12]	XP_034438107.1//ubiquitin carboxyl-terminal hydrolase CYLD isoform X3 [Hippoglossus hippoglossus];AWP10471.1//putative ubiquitin carboxyl-terminal hydrolase CYLD-like [Scophthalmus maximus];XP_035503523.1//ubiquitin carboxyl-terminal hydrolase CYLD [Scophthalmus maximus]
SMAX5B_001935	CP026263.1	10601224..10604615	7.71681	1.38921	2.61936	0.00314236	0.0397153	1	protein_coding	K04179//C-C chemokine receptor type 4;K04178//C-C chemokine receptor type 3	AWP20974.1//putative C-C chemokine receptor type 3-like [Scophthalmus maximus]
SMAX5B_011822	CP026243.1	complement(17701820..17710022)	61.5498	1.3865	2.61444	3.25849e-12	4.00626e-10	6.18298e-08	protein_coding	K03159//lymphotoxin beta receptor TNFR superfamily member 3;K03160//tumor necrosis factor receptor superfamily member 5	AWO96403.1//putative tumor necrosis factor receptor superfamily member 5-like [Scophthalmus maximus];XP_035498457.1//tumor necrosis factor receptor superfamily member 5 [Scophthalmus maximus]
SMAX5B_020795	CP026261.1	12237995..12245388	502.642	1.38476	2.61128	0.00197649	0.0281747	1	protein_coding	K22583//metalloproteinase inhibitor 2	XP_035471533.1//metalloproteinase inhibitor 2b [Scophthalmus maximus]
SMAX5B_015717	CP026264.1	4558550..4568027	152.299	1.38399	2.6099	5.56994e-07	2.69176e-05	0.010569	protein_coding	K01322//prolyl oligopeptidase [EC:3.4.21.26]	XP_035537734.1//prolyl endopeptidase-like [Morone saxatilis]
SMAX5B_011591	CP026250.1	complement(7512753..7520997)	26.8248	1.38301	2.60813	1.04745e-06	4.75933e-05	0.0198753	protein_coding	K04676//mothers against decapentaplegic homolog 1	XP_035493752.1//mothers against decapentaplegic homolog 1 [Scophthalmus maximus]
SMAX5B_003934	CP026243.1	2159399..2180576	90.047	1.38263	2.60744	3.92998e-09	2.90766e-07	7.45714e-05	protein_coding	K07859//Rho family GTPase 3	KAF0046196.1//hypothetical protein F2P81_002725 [Scophthalmus maximus];AWO95617.1//Rho-related GTP-binding protein RhoE [Scophthalmus maximus];XP_035487963.1//rho family GTPase 3a [Scophthalmus maximus]
SMAX5B_007570	CP026250.1	complement(11716629..11766242)	6.00116	1.38257	2.60733	0.00655806	0.0687938	1	protein_coding	K10380//ankyrin	XP_022070508.1//ankyrin-2-like isoform X1 [Acanthochromis polyacanthus];XP_035492841.1//ankyrin-2-like isoform X16 [Scophthalmus maximus];XP_022070509.1//ankyrin-2-like isoform X2 [Acanthochromis polyacanthus];XP_035492825.1//ankyrin-2-like isoform X2 [Scophthalmus maximus];AWP05684.1//UNCoordinated family member (unc-44)-like [Scophthalmus maximus];XP_035492842.1//ankyrin-2-like isoform X17 [Sco…
SMAX5B_002567	CP026243.1	complement(13436564..13438906)	72.9028	1.37972	2.60218	2.91561e-06	0.000117474	0.0553236	protein_coding	K04328//free fatty acid receptor 2	AWO96137.1//putative free fatty acid receptor 2-like [Scophthalmus maximus]
SMAX5B_005165	CP026248.1	6973365..6990278	58.6462	1.37773	2.59858	4.35366e-08	2.73675e-06	0.000826107	protein_coding	K23727//sphingoid base N-palmitoyltransferase [EC:2.3.1.291]	KAF0034583.1//hypothetical protein F2P81_012341 [Scophthalmus maximus];XP_035487525.1//ceramide synthase 5 isoform X2 [Scophthalmus maximus];AWP02476.1//putative ceramide synthase 5 [Scophthalmus maximus];XP_018533303.1//PREDICTED: ceramide synthase 5-like [Lates calcarifer]
SMAX5B_016866	CP026257.1	11811880..11845482	19.3855	1.37522	2.59408	4.74687e-07	2.32764e-05	0.00900719	protein_coding	K07520//actin-binding LIM protein	XP_035463042.1//actin-binding LIM protein 1a isoform X9 [Scophthalmus maximus];XP_023267466.1//actin-binding LIM protein 1 isoform X9 [Seriola lalandi dorsalis];AWP14288.1//putative actin-binding LIM protein 1-like isoform 2 [Scophthalmus maximus];XP_023267462.1//actin-binding LIM protein 1 isoform X5 [Seriola lalandi dorsalis];XP_035463043.1//actin-binding LIM protein 1a isoform X10 [Scophthalmu…
SMAX5B_013075	CP026247.1	22656643..22666899	196.007	1.37084	2.58621	0.000253393	0.00532954	1	protein_coding	K11140//aminopeptidase N [EC:3.4.11.2]	XP_034437011.1//aminopeptidase N-like isoform X1 [Hippoglossus hippoglossus]
SMAX5B_011016	CP026251.1	complement(11621852..11629222)	232.961	1.36835	2.58175	2.79666e-06	0.000113779	0.0530667	protein_coding	K13723//endoplasmic reticulum aminopeptidase 2 [EC:3.4.11.-]	XP_022612733.1//endoplasmic reticulum aminopeptidase 2-like [Seriola dumerili];AWP06985.1//putative endoplasmic reticulum aminopeptidase 2-like isoform 2 [Scophthalmus maximus]
SMAX5B_011882	CP026243.1	complement(20679843..20687674)	107.998	1.36307	2.57231	5.44333e-05	0.00151444	1	protein_coding	K00757//uridine phosphorylase [EC:2.4.2.3]	AWO96678.1//Uridine phosphorylase [Scophthalmus maximus];XP_035493817.1//uridine phosphorylase 1 [Scophthalmus maximus]
SMAX5B_015407	CP026252.1	complement(23686147..23696213)	4.58961	1.35755	2.56249	0.00254785	0.0340004	1	protein_coding	K11140//aminopeptidase N [EC:3.4.11.2]	XP_034444576.1//aminopeptidase N-like [Hippoglossus hippoglossus]
SMAX5B_012720	CP026247.1	8844118..8850595	41.339	1.35652	2.56067	5.48733e-08	3.38574e-06	0.00104122	protein_coding	K14575//AAA family ATPase	AWP01380.1//putative spermatogenesis-associated protein 5-like protein 1 [Scophthalmus maximus];XP_035483252.1//spermatogenesis-associated protein 5-like protein 1 [Scophthalmus maximus];AWP01383.1//putative spermatogenesis-associated protein 5-like protein 1 isoform 4 [Scophthalmus maximus];AWP01382.1//putative spermatogenesis-associated protein 5-like protein 1 isoform 3 [Scophthalmus maximus];…
SMAX5B_016737	CP026244.1	complement(19515153..19671107)	24.2941	1.35532	2.55854	6.08744e-10	5.24681e-08	1.15509e-05	protein_coding	K21413//ankyrin repeat and SAM domain-containing protein 1	XP_035506053.1//LOW QUALITY PROTEIN: ankyrin repeat and sterile alpha motif domain-containing protein 1B [Scophthalmus maximus];XP_023263986.1//ankyrin repeat and sterile alpha motif domain-containing protein 1B isoform X1 [Seriola lalandi dorsalis];XP_031714644.1//ankyrin repeat and sterile alpha motif domain-containing protein 1B isoform X4 [Anarrhichthys ocellatus];AWO98136.1//putative ankyrin…
SMAX5B_019099	CP026255.1	15710033..15717778	551.483	1.3535	2.55532	4.55515e-05	0.00129535	0.86434	protein_coding	K23829//TNFAIP3-interacting protein 1	XP_035505133.1//TNFAIP3-interacting protein 1 isoform X3 [Scophthalmus maximus];XP_035505134.1//TNFAIP3-interacting protein 1 isoform X4 [Scophthalmus maximus];AWP12312.1//putative TNFAIP3-interacting protein 1 [Scophthalmus maximus]
SMAX5B_000673	CP026245.1	complement(20649192..20678421)	64.8359	1.34749	2.54469	1.05394e-06	4.77586e-05	0.0199985	protein_coding	K05766//protein phosphatase slingshot [EC:3.1.3.16 3.1.3.48]	XP_023263925.1//protein phosphatase Slingshot homolog 2 isoform X1 [Seriola lalandi dorsalis];XP_035479107.1//protein phosphatase Slingshot homolog 2 isoform X2 [Scophthalmus maximus];KAF0030767.1//hypothetical protein F2P81_017498 [Scophthalmus maximus];AWO99353.1//putative protein phosphatase Slingshot -like 2-like [Scophthalmus maximus]
SMAX5B_016013	CP026261.1	19810422..19810853	389.703	1.34359	2.53782	1.13035e-09	9.21976e-08	2.14483e-05	protein_coding	K23573//dentin sialophosphoprotein	XP_035471492.1//uncharacterized protein LOC118288982 [Scophthalmus maximus];AWP19476.1//Hypothetical protein SMAX5B_016013 [Scophthalmus maximus]
SMAX5B_010283	CP026251.1	complement(17340686..17345906)	20.5737	1.3409	2.5331	1.05184e-05	0.000367177	0.199586	protein_coding	K01080//phosphatidate phosphatase [EC:3.1.3.4]	XP_035496810.1//phospholipid phosphatase 1-like [Scophthalmus maximus]
SMAX5B_016703	CP026260.1	complement(4045051..4046638)	11.949	1.3395	2.53064	0.0023514	0.0318621	1	protein_coding	K09228//KRAB domain-containing zinc finger protein;K12496//early growth response protein 2	XP_023274623.1//E3 SUMO-protein ligase EGR2 [Seriola lalandi dorsalis]
SMAX5B_006625	CP026261.1	complement(4316716..4447563)	27.8663	1.33829	2.52852	9.31353e-06	0.000331344	0.176724	protein_coding	K09171//nuclear factor I/X	AWP18435.1//Nuclear factor 1 isoform 3 [Scophthalmus maximus];XP_008328866.1//nuclear factor 1 X-type isoform X10 [Cynoglossus semilaevis];XP_018554087.1//PREDICTED: nuclear factor 1 X-type-like isoform X4 [Lates calcarifer];CAA68952.1//transcription factor NfiX [Mus musculus];XP_001568166.1//proteophosphoglycan ppg4 [Leishmania braziliensis MHOM/BR/75/M2904];XP_003722448.1//proteophosphoglycan p…
SMAX5B_009231	CP026254.1	complement(1675418..1677072)	15.3949	1.33613	2.52473	0.00381565	0.046166	1	protein_coding	K23578//insulin-like growth factor-binding protein 1	XP_035502540.1//insulin-like growth factor-binding protein 1 [Scophthalmus maximus]
SMAX5B_018900	CP026243.1	complement(4139030..4153333)	11.0321	1.33317	2.51956	0.00140047	0.0214444	1	protein_coding	K01049//acetylcholinesterase [EC:3.1.1.7]	KAF3697438.1//Acetylcholinesterase [Channa argus];XP_035485954.1//acetylcholinesterase [Scophthalmus maximus]
SMAX5B_001216	CP026263.1	complement(14141298..14149708)	150.164	1.32673	2.50833	7.48604e-06	0.000275714	0.142048	protein_coding	K04693//interferon regulatory factor 9	XP_035475729.1//interferon regulatory factor 9 isoform X2 [Scophthalmus maximus];XP_035475728.1//interferon regulatory factor 9 isoform X1 [Scophthalmus maximus]
SMAX5B_011005	CP026251.1	9432825..9436611	14.5523	1.32606	2.50717	0.000484733	0.00910913	1	protein_coding	K12376//arylsulfatase K [EC:3.1.6.-]	AWP06895.1//putative arylsulfatase K [Scophthalmus maximus]
SMAX5B_007332	CP026250.1	complement(16319746..16325315)	102.912	1.3246	2.50463	2.14038e-10	1.98829e-08	4.06137e-06	protein_coding	K04459//dual specificity MAP kinase phosphatase [EC:3.1.3.16 3.1.3.48]	XP_035494274.1//dual specificity protein phosphatase 5 [Scophthalmus maximus]
SMAX5B_021142	CP026257.1	complement(21721805..21737673)	91.7898	1.32359	2.50289	2.03629e-11	2.24006e-09	3.86387e-07	protein_coding	K04469//nuclear factor of kappa light polypeptide gene enhancer in B-cells 2	XP_018545799.1//PREDICTED: nuclear factor NF-kappa-B p100 subunit isoform X1 [Lates calcarifer];AWP14747.1//NF-kappaB 2 [Scophthalmus maximus]
SMAX5B_010350	CP026251.1	16648314..16649228	88.3141	1.31453	2.48721	2.36958e-05	0.00074477	0.449628	protein_coding	K22017//mucin-4	XP_027725048.1//growth arrest and DNA damage-inducible protein GADD45 gamma [Vombatus ursinus]
SMAX5B_017960	CP026257.1	complement(7200652..7211433)	154.032	1.31187	2.48264	0.000246569	0.00520566	1	protein_coding	K06532//prominin 1	AWP14029.1//putative prominin-1-A-like [Scophthalmus maximus];XP_022619372.1//prominin-1-A-like [Seriola dumerili];XP_019943744.1//PREDICTED: prominin-1-A-like [Paralichthys olivaceus]
SMAX5B_002943	CP026254.1	2083946..2092284	47.2187	1.30239	2.46637	6.16971e-06	0.000232875	0.11707	protein_coding	K09445//interferon regulatory factor 4	AWP10520.1//Interferon regulatory factor 4 [Scophthalmus maximus]
SMAX5B_011481	CP026250.1	3189361..3203171	33.1806	1.30136	2.46461	4.02588e-06	0.000158392	0.0763911	protein_coding	K17386//platelet-derived growth factor subunit B	XP_035493444.1//trithorax group protein osa [Scophthalmus maximus];AWP05226.1//putative platelet-derived growth factor subunit B [Scophthalmus maximus]
SMAX5B_017745	CP026257.1	20106658..20116339	74.1185	1.30123	2.46439	3.13471e-07	1.62781e-05	0.00594811	protein_coding	K06237//collagen, type IV, alpha	XP_018516279.1//PREDICTED: LOW QUALITY PROTEIN: multimerin-2 [Lates calcarifer];CAB3260868.1//unnamed protein product, partial [Arctia plantaginis]
SMAX5B_016284	CP026249.1	22655580..22695913	8.45838	1.29516	2.45404	2.81665e-06	0.000114278	0.053446	protein_coding	K09239//human immunodeficiency virus type I enhancer-binding protein	AWP04814.1//putative transcription factor HIVEP3-like [Scophthalmus maximus];XP_035489261.1//transcription factor HIVEP3 [Scophthalmus maximus]
SMAX5B_021734	CP026249.1	complement(17702851..17710747)	5.00977	1.29112	2.44718	0.0043087	0.0506651	1	protein_coding	K21440//ankyrin repeat domain-containing protein 50;K10661//E3 ubiquitin-protein ligase MARCH6 [EC:2.3.2.27]	XP_035489635.1//ankyrin repeat domain-containing protein 33B-like isoform X1 [Scophthalmus maximus];AWP04610.1//putative ankyrin repeat domain-containing protein 33B-like [Scophthalmus maximus]
SMAX5B_014719	CP026253.1	10033733..10039915	5.01088	1.27591	2.42152	0.00222239	0.0306131	1	protein_coding	NA	XP_035501180.1//tetratricopeptide repeat protein 34 [Scophthalmus maximus]
SMAX5B_018453	CP026256.1	complement(15022082..15033503)	2.12965	1.27427	2.41876	0.00533843	0.0588398	1	protein_coding	K19607//X-linked retinitis pigmentosa GTPase regulator	AWP13291.1//putative X-linked retinitis pigmentosa GTPase regulator-like [Scophthalmus maximus]
SMAX5B_018188	CP026256.1	complement(11520156..11526406)	6.85267	1.27306	2.41673	0.0076807	0.0773203	1	protein_coding	K01278//dipeptidyl-peptidase 4 [EC:3.4.14.5]	XP_018557910.1//PREDICTED: dipeptidyl peptidase 4-like [Lates calcarifer];AWP13061.1//putative dipeptidyl peptidase 4-like [Scophthalmus maximus]
SMAX5B_011172	CP026261.1	16366770..16391280	10.3444	1.2721	2.41512	0.00458596	0.0531406	1	protein_coding	K12558//myosin-binding protein C, fast-type	XP_018527736.1//PREDICTED: myosin-binding protein C, fast-type isoform X2 [Lates calcarifer]
SMAX5B_006548	CP026249.1	16835528..16840694	19.332	1.27169	2.41445	0.000176996	0.00403758	1	protein_coding	K13073//polymeric immunoglobulin receptor	AGN54539.1//polymeric immunoglobulin receptor [Scophthalmus maximus]
SMAX5B_012512	CP026246.1	complement(4677122..4680314)	35.6412	1.27148	2.41409	0.000197309	0.0043698	1	protein_coding	K19607//X-linked retinitis pigmentosa GTPase regulator;K23757	AWO99761.1//putative UPF0769 protein C21orf59 -like [Scophthalmus maximus];XP_035483106.1//cilia- and flagella-associated protein 298 [Scophthalmus maximus]
SMAX5B_021531	CP026246.1	complement(3264534..3266918)	18.056	1.26828	2.40874	0.00104914	0.0170152	1	protein_coding	K15261//poly [ADP-ribose] polymerase 10/14/15 [EC:2.4.2.30];K18626//trichohyalin	XP_035482641.1//GTPase IMAP family member 8-like isoform X1 [Scophthalmus maximus];AWO99731.1//putative GTPase IMAP family member 8-like [Scophthalmus maximus]
SMAX5B_005886	CP026249.1	15959416..15966374	25.0122	1.267	2.4066	7.11478e-06	0.0002632	0.135003	protein_coding	K04398//caspase 8 [EC:3.4.22.61]	AWP04521.1//putative ciliogenesis-associated TTC17-interacting protein [Scophthalmus maximus];XP_035491774.1//caspase-8-like [Scophthalmus maximus]
SMAX5B_000647	CP026245.1	19601067..19615121	6.545	1.26671	2.40612	0.00651447	0.0684068	1	protein_coding	K06057//numb	AWO99305.1//putative protein numb -like [Scophthalmus maximus];XP_035479299.1//numb-like protein isoform X2 [Scophthalmus maximus]
SMAX5B_022423	CP026254.1	16677718..16681012	56.2911	1.2661	2.4051	9.84961e-06	0.000347458	0.186896	protein_coding	K08062//regulatory factor X-associated ankyrin-containing protein	AWP11170.1//putative DNA-binding protein RFXANK isoform 7 [Scophthalmus maximus];XP_035502678.1//DNA-binding protein RFXANK isoform X2 [Scophthalmus maximus];XP_035502677.1//DNA-binding protein RFXANK isoform X1 [Scophthalmus maximus];AWP11171.1//putative DNA-binding protein RFXANK isoform 8 [Scophthalmus maximus];KAF0042305.1//hypothetical protein F2P81_005837 [Scophthalmus maximus]
SMAX5B_007751	CP026244.1	19426190..19435788	131.392	1.26041	2.39564	6.60899e-07	3.12172e-05	0.0125406	protein_coding	K15261//poly [ADP-ribose] polymerase 10/14/15 [EC:2.4.2.30];K15259//poly [ADP-ribose] polymerase 7/11/12/13 [EC:2.4.2.30]	XP_035502501.1//uncharacterized protein si:ch211-244b2.3 isoform X3 [Scophthalmus maximus];XP_035502543.1//zinc finger CCCH-type antiviral protein 1 [Scophthalmus maximus];XP_035502482.1//uncharacterized protein si:ch211-244b2.3 isoform X1 [Scophthalmus maximus];AWO98127.1//Hypothetical protein SMAX5B_007751 [Scophthalmus maximus];XP_035502492.1//uncharacterized protein si:ch211-244b2.3 isoform X…
SMAX5B_007233	CP026260.1	complement(21309534..21317135)	207.144	1.25965	2.39438	4.01102e-07	2.02013e-05	0.0076109	protein_coding	K12314//actin, alpha cardiac muscle;K10354//actin, alpha skeletal muscle;K12313//actin, aortic smooth muscle;K05692//actin beta/gamma 1	XP_017821891.2//actin, cytoplasmic 2-like [Callithrix jacchus];AWP18232.1//Actin alpha cardiac muscle 1 [Scophthalmus maximus]
SMAX5B_010808	CP026251.1	complement(9453854..9464935)	12.6409	1.25809	2.39179	0.00103509	0.0169021	1	protein_coding	K10352//myosin heavy chain;K05175//gamma-aminobutyric acid receptor subunit alpha;K16474//intraflagellar transport protein 88;K23573//dentin sialophosphoprotein;K16469//rootletin;K01027//3-oxoacid CoA-transferase [EC:2.8.3.5]	AWP06898.1//putative protein FAM81B [Scophthalmus maximus]
SMAX5B_003271	CP026253.1	8835830..8874008	10.0102	1.2547	2.38618	0.000870484	0.0146875	1	protein_coding	K18441//cytohesin	XP_018544383.1//PREDICTED: espin [Lates calcarifer];XP_034446801.1//espin isoform X2 [Hippoglossus hippoglossus]
SMAX5B_003644	CP026258.1	7131735..7141771	79.4924	1.25116	2.38033	0.000700297	0.0122872	1	protein_coding	K00503//dopamine beta-monooxygenase [EC:1.14.17.1]	XP_035463633.1//dopamine beta-hydroxylase [Scophthalmus maximus];XP_022624159.1//dopamine beta-hydroxylase [Seriola dumerili]
SMAX5B_013269	CP026256.1	21899453..21916142	4.46079	1.25099	2.38005	0.00840669	0.0823964	1	protein_coding	K08808//protein serine kinase H [EC:2.7.11.1];K16462//centrosomal protein CEP164;K21754//BTB/POZ domain-containing protein KCTD1/15;K09291//nucleoprotein TPR;K23781;K04946//potassium channel subfamily T member 1;K20478//golgin subfamily B member 1	XP_035507138.1//LOW QUALITY PROTEIN: ecto-NOX disulfide-thiol exchanger 1 [Scophthalmus maximus];XP_033474056.1//ecto-NOX disulfide-thiol exchanger 1 isoform X2 [Epinephelus lanceolatus];XP_029702704.1//ecto-NOX disulfide-thiol exchanger 1-like [Takifugu rubripes];AWP13679.1//putative ecto-NOX disulfide-thiol exchanger 1 [Scophthalmus maximus]
SMAX5B_008811	CP026255.1	12808944..12811534	46.3053	1.24834	2.37568	1.45232e-08	1.00765e-06	0.000275578	protein_coding	K05398//toll-like receptor 1	ANS71060.1//tlr1 [Scophthalmus maximus]
SMAX5B_010237	CP026256.1	20897786..20905900	55.6515	1.24682	2.37317	0.00104418	0.0169935	1	protein_coding	K21763//mitogen-activated protein kinase binding protein 1;K14713//solute carrier family 39 (zinc transporter), member 7;K04437//filamin;K22403//zinc finger MIZ domain-containing protein	XP_029571708.1//LIM domain-containing protein A-like isoform X32 [Salmo trutta];TDG99342.1//hypothetical protein EPR50_G00193040 [Perca flavescens];KAF0026900.1//hypothetical protein F2P81_021637 [Scophthalmus maximus]
SMAX5B_001157	CP026256.1	complement(19701375..19704305)	25.2839	1.24405	2.36862	0.00060613	0.0109097	1	protein_coding	K23034//terminal nucleotidyltransferase 5C [EC:2.7.7.19]	XP_032372076.1//terminal nucleotidyltransferase 5C [Etheostoma spectabile]
SMAX5B_011679	CP026243.1	complement(23033120..23035041)	189.098	1.23488	2.35362	1.92295e-06	8.09917e-05	0.036488	protein_coding	K16336//syndecan 2	XP_035485785.1//syndecan-2-like [Scophthalmus maximus];AWO96875.1//putative syndecan-2-like [Scophthalmus maximus]
SMAX5B_003066	CP026250.1	1180403..1187426	84.8027	1.23226	2.34935	6.31653e-06	0.000237345	0.119856	protein_coding	K15113//solute carrier family 25 (mitochondrial iron transporter), member 28/37	AWP05121.1//putative mitoferrin-2-like [Scophthalmus maximus]
SMAX5B_012565	CP026247.1	15474972..15483043	27.4916	1.22697	2.34075	9.54505e-05	0.00241822	1	protein_coding	K09234//Wilms tumor protein 1	XP_008285311.1//PREDICTED: Wilms tumor protein isoform X2 [Stegastes partitus];XP_034437635.1//WT1 transcription factor b isoform X2 [Hippoglossus hippoglossus]
SMAX5B_013308	CP026245.1	12275660..12285969	118.33	1.22575	2.33877	5.64257e-07	2.71119e-05	0.0107068	protein_coding	K09253//transcription factor RelB	XP_035479802.1//transcription factor RelB isoform X5 [Scophthalmus maximus];XP_035479798.1//transcription factor RelB isoform X1 [Scophthalmus maximus]
SMAX5B_004064	CP026246.1	13742759..13746634	8.07885	1.22508	2.33768	0.00606261	0.0647337	1	protein_coding	K09519//DnaJ homolog subfamily B member 13	KAF0038213.1//hypothetical protein F2P81_008697 [Scophthalmus maximus];XP_035481009.1//dnaJ homolog subfamily B member 13 isoform X1 [Scophthalmus maximus];AWP00259.1//putative dnaJ -like subfamily B member 13 [Scophthalmus maximus]
SMAX5B_004706	CP026251.1	24363514..24368808	2.30894	1.22476	2.33716	0.00821756	0.0808746	1	protein_coding	NA	AWP07709.1//Peptidase M10 C domain containing protein [Scophthalmus maximus]
SMAX5B_007598	CP026250.1	complement(13954589..13965319)	21.7437	1.22419	2.33624	0.00046672	0.00884328	1	protein_coding	K18643//katanin p80 WD40 repeat-containing subunit B1;K18598//echinoderm microtubule-associated protein-like 6	XP_035492408.1//cilia- and flagella-associated protein 52 [Scophthalmus maximus];XP_031145275.1//cilia- and flagella-associated protein 52 [Sander lucioperca]
SMAX5B_020126	CP026260.1	11718923..11725110	29.2324	1.22382	2.33564	1.56529e-06	6.74566e-05	0.0297013	protein_coding	K05411//interferon regulatory factor 3	XP_035467560.1//interferon regulatory factor 3 isoform X2 [Scophthalmus maximus]
SMAX5B_018425	CP026256.1	6859756..6890864	104.816	1.22152	2.33192	0.000891021	0.0149736	1	protein_coding	K05717//fibronectin 1	AWP12863.1//putative fibronectin-like [Scophthalmus maximus]
SMAX5B_000655	CP026245.1	20732975..20735102	59.2947	1.21801	2.32626	5.46656e-05	0.00151838	1	protein_coding	NA	XP_035478136.1//uncharacterized protein si:dkey-52l18.4 [Scophthalmus maximus]
SMAX5B_015254	CP026251.1	complement(25104742..25127437)	72.0245	1.21783	2.32597	5.53536e-10	4.79569e-08	1.05033e-05	protein_coding	K06834//disintegrin and metalloproteinase domain-containing protein 9 [EC:3.4.24.-]	AWP07767.1//putative disintegrin and metalloproteinase domain-containing protein 9 [Scophthalmus maximus];XP_003938179.1//PREDICTED: disintegrin and metalloproteinase domain-containing protein 9 [Saimiri boliviensis boliviensis]
SMAX5B_011057	CP026251.1	complement(9597965..9627092)	7.02643	1.21261	2.31757	0.000896044	0.0150429	1	protein_coding	K10728//topoisomerase (DNA) II binding protein 1;K10683//BRCA1-associated RING domain protein 1	AWP06901.1//putative ankyrin repeat domain-containing protein 32 [Scophthalmus maximus];XP_034451193.1//SMC5-SMC6 complex localization factor protein 1 [Hippoglossus hippoglossus]
SMAX5B_021890	CP026259.1	6057683..6071284	230.398	1.21129	2.31544	3.8171e-05	0.00112966	0.724294	protein_coding	K01080//phosphatidate phosphatase [EC:3.1.3.4]	XP_035465653.1//phospholipid phosphatase 2 [Scophthalmus maximus]
SMAX5B_008076	CP026248.1	complement(1886742..1892574)	29.1994	1.21111	2.31515	0.00350585	0.0434207	1	protein_coding	K01307//gamma-glutamyl hydrolase [EC:3.4.19.9]	XP_035488257.1//zgc:171566 isoform X2 [Scophthalmus maximus]
SMAX5B_018378	CP026256.1	complement(15975995..16103363)	5.56948	1.21065	2.31441	0.00677541	0.0704112	1	protein_coding	K10352//myosin heavy chain;K16464//centrosomal protein CEP250;K06835//disintegrin and metalloproteinase domain-containing protein 12 [EC:3.4.24.-]	AWP13365.1//putative filamin A-interacting protein 1-like [Scophthalmus maximus]
SMAX5B_014612	CP026253.1	17026942..17042291	18.5071	1.20891	2.31162	4.12289e-05	0.00120523	0.782319	protein_coding	K06821//plexin B	AWP09912.1//putative plexin-B1-like [Scophthalmus maximus];XP_035501085.1//plexin-B3 [Scophthalmus maximus]
SMAX5B_007523	CP026250.1	17191544..17193934	17.4148	1.20835	2.31073	0.00296306	0.0381118	1	protein_coding	K18631//tektin-4	XP_035492608.1//tektin-4 isoform X2 [Scophthalmus maximus]
SMAX5B_016719	CP026244.1	19768079..19772819	56.3765	1.2073	2.30905	1.34316e-08	9.3579e-07	0.000254864	protein_coding	K18463//WASH complex subunit CCDC53	AWO98149.1//putative WASH complex subunit CCDC53 isoform 2 [Scophthalmus maximus];XP_035469707.1//WASH complex subunit 3 [Scophthalmus maximus]
SMAX5B_020359	CP026260.1	complement(5386801..5417749)	3.90955	1.20498	2.30534	0.00760945	0.0767612	1	protein_coding	K21952//CASK-interacting protein	XP_035469056.1//LOW QUALITY PROTEIN: caskin-2-like [Scophthalmus maximus];AWP17217.1//putative caskin-2-like [Scophthalmus maximus]
SMAX5B_006486	CP026249.1	2749579..2776516	5.87719	1.20364	2.30321	0.00892697	0.0854577	1	protein_coding	K10955//mucin-2;K17341//hemicentin;K18273//alpha-tectorin	AWP03660.1//putative kin of IRRE-like protein 1-like [Scophthalmus maximus]
SMAX5B_018956	CP026255.1	3075285..3096898	155.916	1.20184	2.30032	0.000703758	0.012322	1	protein_coding	K10060//C-type lectin domain family 4 member F	AWP11674.1//putative CD209 antigen-like [Scophthalmus maximus];XP_035506181.1//LOW QUALITY PROTEIN: C-type lectin domain family 4 member M-like [Scophthalmus maximus]
SMAX5B_008097	CP026258.1	21003887..21017776	96.7402	1.19483	2.28918	4.52567e-07	2.24551e-05	0.00858745	protein_coding	K12800//NACHT, LRR and PYD domains-containing protein 3;K22614//NLR family CARD domain-containing protein 3	QHQ71256.1//NLR-C15 [Scophthalmus maximus];XP_018529558.1//PREDICTED: NACHT, LRR and PYD domains-containing protein 3-like isoform X2 [Lates calcarifer];AWP15850.1//PRY domain containing protein [Scophthalmus maximus];XP_035463425.1//LOW QUALITY PROTEIN: NACHT, LRR and PYD domains-containing protein 3-like [Scophthalmus maximus]
SMAX5B_020075	CP026260.1	complement(6309778..6345746)	52.2134	1.1939	2.28771	3.40214e-05	0.00102499	0.645555	protein_coding	K17592//sacsin	AWP17245.1//Hypothetical protein SMAX5B_020075 [Scophthalmus maximus]
SMAX5B_007518	CP026250.1	complement(17673757..17676050)	51.4158	1.19388	2.28766	2.51892e-06	0.000103233	0.0477965	protein_coding	K10293//F-box protein 7	XP_035466668.1//F-box only protein 7 [Scophthalmus maximus]
SMAX5B_007882	CP026254.1	complement(22261154..22263319)	67.9437	1.1933	2.28675	7.57523e-06	0.000278386	0.14374	protein_coding	K04402//growth arrest and DNA-damage-inducible protein	XP_035503034.1//growth arrest and DNA-damage-inducible, alpha, b [Scophthalmus maximus]
SMAX5B_009044	CP026259.1	5020086..5025069	105.735	1.19105	2.28319	4.43508e-06	0.000170873	0.0841556	protein_coding	K10133//tumor protein p53-inducible protein 3 [EC:1.-.-.-]	XP_035466733.1//quinone oxidoreductase PIG3 [Scophthalmus maximus]
SMAX5B_015777	CP026264.1	complement(9820012..9824314)	30.3647	1.19034	2.28207	0.00110418	0.0178387	1	protein_coding	K03663//4-galactosyl-N-acetylglucosaminide 3-alpha-L-fucosyltransferase [EC:2.4.1.152]	AWP21752.1//putative alpha-(1-3)-fucosyltransferase 9-like [Scophthalmus maximus]
SMAX5B_015720	CP026264.1	5125799..5132099	10.224	1.18606	2.2753	0.000230444	0.00494008	1	protein_coding	K18668//ribonuclease ZC3H12 [EC:3.1.-.-]	AWP21450.1//putative ribonuclease ZC3H12A-like [Scophthalmus maximus]
SMAX5B_009236	CP026254.1	complement(447848..453416)	69.0565	1.18469	2.27315	0.00283626	0.036878	1	protein_coding	K14217//interferon-induced protein with tetratricopeptide repeats 1	AWP10440.1//Interferon-inducible protein 56 [Scophthalmus maximus];XP_035503314.1//LOW QUALITY PROTEIN: uncharacterized protein LOC118318087 [Scophthalmus maximus]
SMAX5B_002985	CP026258.1	931492..943552	141.878	1.18065	2.26678	1.61643e-06	6.9244e-05	0.0306718	protein_coding	K11590//methyl-CpG-binding domain protein 2	KAF3835911.1//hypothetical protein F7725_028469 [Dissostichus mawsoni];AWP14874.1//putative methyl-CpG-binding domain protein 2-like [Scophthalmus maximus]
SMAX5B_003062	CP026256.1	21587292..21591681	67.095	1.1789	2.26404	4.00353e-07	2.02013e-05	0.0075967	protein_coding	K06538//cytotoxic T-lymphocyte-associated protein 4	XP_035459903.1//uncharacterized protein LOC118282698 [Scophthalmus maximus]
SMAX5B_008154	CP026262.1	4499259..4508994	70.2731	1.17744	2.26175	1.3851e-05	0.000466	0.262822	protein_coding	K06237//collagen, type IV, alpha;K15503//serine/threonine-protein phosphatase 6 regulatory ankyrin repeat subunit B	XP_034435866.1//EMILIN-1a [Hippoglossus hippoglossus]
SMAX5B_017303	CP026260.1	complement(13395035..13402011)	58.8292	1.17527	2.25834	2.33475e-07	1.25933e-05	0.00443019	protein_coding	K04397//caspase 7 [EC:3.4.22.60]	XP_035467972.1//caspase-7 [Scophthalmus maximus];XP_033468121.1//caspase-7 isoform X3 [Epinephelus lanceolatus];KAF0025464.1//hypothetical protein F2P81_022345 [Scophthalmus maximus]
SMAX5B_005738	CP026249.1	complement(2941417..2945594)	107.801	1.1747	2.25746	5.38686e-08	3.33606e-06	0.00102216	protein_coding	K07983//high affinity immunoglobulin epsilon receptor subunit gamma	AWP03678.1//putative high affinity immunoglobulin epsilon receptor subunit gamma-like isoform 3 [Scophthalmus maximus];AWP03677.1//putative high affinity immunoglobulin epsilon receptor subunit gamma-like isoform 2 [Scophthalmus maximus];AWP03676.1//putative high affinity immunoglobulin epsilon receptor subunit gamma-like [Scophthalmus maximus]
SMAX5B_002277	CP026248.1	10341493..10345291	4.78405	1.1714	2.25231	0.00870518	0.0840625	1	protein_coding	K04626//taste receptor type 1 member 3	AWP02602.1//putative taste receptor type 1 member 3 [Scophthalmus maximus]
SMAX5B_008782	CP026261.1	15831094..15844664	257.229	1.16838	2.2476	0.000318265	0.00648989	1	protein_coding	K04692//signal transducer and activator of transcription 3	XP_035472110.1//signal transducer and activator of transcription 3 isoform X2 [Scophthalmus maximus];XP_035472109.1//signal transducer and activator of transcription 3 isoform X1 [Scophthalmus maximus]
SMAX5B_020926	CP026261.1	complement(12077219..12106352)	84.8923	1.16383	2.24052	0.000578137	0.0105535	1	protein_coding	K22754//E3 ubiquitin-protein ligase RNF213 [EC:2.3.2.27]	XP_035469973.1//E3 ubiquitin-protein ligase rnf213-alpha [Scophthalmus maximus];XP_022608373.1//E3 ubiquitin-protein ligase rnf213-alpha-like [Seriola dumerili];AWP18959.1//putative E3 ubiquitin-protein ligase RNF213 [Scophthalmus maximus];AWP18962.1//putative E3 ubiquitin-protein ligase RNF213 isoform 4 [Scophthalmus maximus]
SMAX5B_005545	CP026243.1	complement(8616046..8627435)	14.1714	1.16209	2.23782	1.19216e-06	5.31574e-05	0.0226212	protein_coding	K17341//hemicentin	AWO95939.1//putative immunoglobulin superfamily member 10-like [Scophthalmus maximus]
SMAX5B_005640	CP026247.1	complement(5431093..5438811)	166.807	1.16178	2.23734	6.00147e-05	0.00164509	1	protein_coding	K19995//secretory carrier-associated membrane protein	KAF0042908.1//hypothetical protein F2P81_004245 [Scophthalmus maximus];XP_035484163.1//secretory carrier membrane protein 2, like [Scophthalmus maximus]
SMAX5B_006013	CP026249.1	2817988..2842939	163.662	1.16076	2.23575	0.000113207	0.00274736	1	protein_coding	K09228//KRAB domain-containing zinc finger protein;K03783//purine-nucleoside phosphorylase [EC:2.4.2.1]	XP_023255044.1//zinc finger protein 260-like [Seriola lalandi dorsalis];XP_025756063.1//zinc finger protein 585A isoform X8 [Oreochromis niloticus];XP_027893258.1//zinc finger protein 585A-like isoform X3 [Xiphophorus couchianus];AWP03667.1//putative gastrula zinc finger protein XlCGF57.1-like [Scophthalmus maximus]
SMAX5B_002994	CP026258.1	878553..882023	73.3277	1.15605	2.22846	0.000136756	0.00323436	1	protein_coding	K05058//leukemia inhibitory factor receptor	AWP14868.1//putative oncostatin-M-specific receptor subunit beta-like [Scophthalmus maximus]
SMAX5B_007175	CP026249.1	1911884..1917648	18.896	1.15365	2.22476	2.99391e-05	0.000917349	0.568095	protein_coding	K10349//Fem-1 homolog b;K12006//tripartite motif-containing protein 16	AWP03631.1//putative tripartite motif-containing protein 16-like [Scophthalmus maximus];XP_035489533.1//LOW QUALITY PROTEIN: tripartite motif-containing protein 16-like [Scophthalmus maximus]
SMAX5B_021485	CP026261.1	complement(2231086..2245409)	63.4324	1.15234	2.22274	1.11859e-07	6.58332e-06	0.00212252	protein_coding	K10585//ubiquitin-conjugating enzyme E2 Z [EC:2.3.2.23]	XP_035470115.1//ubiquitin-conjugating enzyme E2 Z [Scophthalmus maximus]
SMAX5B_010352	CP026251.1	18081593..18083954	22.0809	1.14607	2.21311	0.0051215	0.0572437	1	protein_coding	K04459//dual specificity MAP kinase phosphatase [EC:3.1.3.16 3.1.3.48]	XP_023120223.1//dual specificity protein phosphatase 2 [Amphiprion ocellaris]
SMAX5B_019758	CP026244.1	213853..222015	40.9295	1.14104	2.20541	4.10877e-06	0.00016052	0.0779639	protein_coding	K08847//receptor-interacting serine/threonine-protein kinase 3 [EC:2.7.11.1]	AWO97208.1//putative receptor-interacting serine/threonine-protein kinase 3-like [Scophthalmus maximus];XP_035473892.1//receptor-interacting serine/threonine-protein kinase 3 [Scophthalmus maximus]
SMAX5B_008923	CP026255.1	13373416..13387441	19.5312	1.13965	2.20328	0.00177789	0.0257832	1	protein_coding	K00820//glutamine---fructose-6-phosphate transaminase (isomerizing) [EC:2.6.1.16]	XP_035506174.1//glutamine--fructose-6-phosphate aminotransferase [isomerizing] 2 [Scophthalmus maximus]
SMAX5B_015853	CP026264.1	complement(2476772..2489477)	17.8816	1.13732	2.19972	0.000543498	0.0100307	1	protein_coding	K11973//E3 ubiquitin-protein ligase RNF19B [EC:2.3.2.31]	AWP21287.1//putative E3 ubiquitin-protein ligase RNF19B-like [Scophthalmus maximus]
SMAX5B_018922	CP026255.1	2737643..2744516	73.9047	1.13723	2.19959	4.18935e-07	2.09731e-05	0.0079493	protein_coding	K23573//dentin sialophosphoprotein	XP_006629222.1//PREDICTED: leptin receptor overlapping transcript-like 1 [Lepisosteus oculatus];XP_008324809.1//leptin receptor overlapping transcript-like 1 [Cynoglossus semilaevis];XP_026185780.1//leptin receptor overlapping transcript-like 1 [Mastacembelus armatus]
SMAX5B_020562	CP026260.1	19960575..19973502	8.39341	1.13595	2.19764	0.00448834	0.0523358	1	protein_coding	K23695	AWP18129.1//putative growth factor receptor-bound protein 7-like [Scophthalmus maximus]
SMAX5B_010630	CP026244.1	complement(2963492..2970552)	77.9533	1.13324	2.19351	7.42448e-07	3.45807e-05	0.014088	protein_coding	K15261//poly [ADP-ribose] polymerase 10/14/15 [EC:2.4.2.30]	XP_035461312.1//uncharacterized protein LOC118283447 [Scophthalmus maximus];AWO97418.1//putative GTPase IMAP family member 7-like [Scophthalmus maximus]
SMAX5B_016940	CP026244.1	22049281..22055030	1940.08	1.13101	2.19013	0.0024807	0.0331838	1	protein_coding	K17349//tetraspanin-8	XP_035468494.1//tetraspanin-33-like [Scophthalmus maximus]
SMAX5B_011453	CP026250.1	complement(4043008..4062426)	15.9558	1.12767	2.18505	0.00111712	0.0180302	1	protein_coding	K04346//guanine nucleotide-binding protein subunit alpha-12	XP_035493906.1//guanine nucleotide-binding protein subunit alpha-12a isoform X1 [Scophthalmus maximus]
SMAX5B_005736	CP026249.1	complement(9110528..9115424)	369.168	1.12723	2.18439	9.76612e-05	0.00245194	1	protein_coding	K02731//20S proteasome subunit alpha 4 [EC:3.4.25.1]	AWP04027.1//Proteasome subunit alpha type-7 isoform 3 [Scophthalmus maximus];AWP04026.1//Proteasome subunit alpha type-7 isoform 2 [Scophthalmus maximus];XP_035489772.1//proteasome subunit alpha-type 8 [Scophthalmus maximus]
SMAX5B_003703	CP026258.1	9964524..9968146	646.269	1.12713	2.18424	0.00337197	0.0420452	1	protein_coding	K09490//heat shock 70kDa protein 5	XP_034751556.1//endoplasmic reticulum chaperone BiP isoform X1 [Etheostoma cragini];AWP15332.1//78 kDa glucose-regulated protein [Scophthalmus maximus]
SMAX5B_001751	CP026250.1	20445376..20453242	43.1606	1.1243	2.17996	3.67274e-07	1.87231e-05	0.00696902	protein_coding	K22666//NACHT, LRR and PYD domains-containing protein 14;K20865//NACHT, LRR and PYD domains-containing protein 12	XP_035493742.1//NACHT, LRR and PYD domains-containing protein 14-like [Scophthalmus maximus]
SMAX5B_018410	CP026256.1	12403410..12426414	29.4588	1.12417	2.17975	1.93949e-05	0.000623657	0.368018	protein_coding	K04424//sterile alpha motif and leucine zipper containing kinase AZK [EC:2.7.11.25]	XP_035459693.1//mitogen-activated protein kinase kinase kinase 20 isoform X1 [Scophthalmus maximus]
SMAX5B_017728	CP026257.1	complement(20158207..20163235)	45.3238	1.1208	2.17468	0.0003871	0.00759566	1	protein_coding	NA	AWP14652.1//putative prolyl-tRNA synthetase associated domain-containing protein 1-like [Scophthalmus maximus]
SMAX5B_017448	CP026260.1	complement(13424060..13454187)	24.6284	1.11998	2.17343	9.65649e-07	4.42373e-05	0.0183232	protein_coding	K20705//dynamin-binding protein	AWP17738.1//putative dynamin-binding protein [Scophthalmus maximus];XP_035001204.1//dynamin-binding protein isoform X6 [Hippoglossus stenolepis]
SMAX5B_017026	CP026246.1	23368907..23378559	24.1613	1.11915	2.17219	0.00214981	0.0299558	1	protein_coding	K20910//thioredoxin-interacting protein	AWP00631.1//putative arrestin domain-containing protein 3-like [Scophthalmus maximus];KAE8285488.1//Arrestin domain-containing protein 3 [Larimichthys crocea]
SMAX5B_008607	CP026261.1	15576975..15580489	18.7707	1.11897	2.17193	0.00627962	0.0665408	1	protein_coding	K08448//receptor activity modifying protein 2	XP_035470459.1//receptor activity-modifying protein 2 isoform X1 [Scophthalmus maximus];XP_035470462.1//receptor activity-modifying protein 2 isoform X3 [Scophthalmus maximus]
SMAX5B_002431	CP026243.1	5042546..5050827	19.3051	1.11674	2.16857	3.52971e-05	0.00105393	0.669763	protein_coding	K08617//a disintegrin and metalloproteinase with thrombospondin motifs 1 [EC:3.4.24.-]	AWO95741.1//putative disintegrin and metalloproteinase with thrombospondin motifs 1 [Scophthalmus maximus]
SMAX5B_014172	CP026248.1	complement(14912005..14923328)	35.2392	1.11532	2.16644	1.97234e-06	8.28632e-05	0.0374252	protein_coding	K23334//Ran-binding protein 9/10	XP_035486786.1//SPRY domain-containing protein 3-like [Scophthalmus maximus]
SMAX5B_021635	CP026244.1	complement(4055371..4060019)	1275.52	1.11313	2.16314	0.00243482	0.0326747	1	protein_coding	K03671//thioredoxin 1	XP_035469451.1//thioredoxin-like [Scophthalmus maximus]
SMAX5B_002949	CP026258.1	complement(705696..716756)	188.327	1.10832	2.15594	0.00017901	0.00406689	1	protein_coding	K05060//interleukin 6 signal transducer	AWP14847.1//putative interleukin-6 receptor subunit beta-like [Scophthalmus maximus];XP_035464299.1//interleukin-6 receptor subunit beta isoform X1 [Scophthalmus maximus]
SMAX5B_010096	CP026252.1	complement(13151599..13153471)	156.803	1.10544	2.15165	0.0015797	0.0235993	1	protein_coding	K17198//Ras-related and estrogen-regulated growth inhibitor-like protein	XP_035498376.1//ras-related and estrogen-regulated growth inhibitor-like protein [Scophthalmus maximus];AWP08488.1//Ras domain containing protein isoform 2 [Scophthalmus maximus]
SMAX5B_013878	CP026258.1	10935827..10940723	26.9603	1.10531	2.15145	5.92298e-05	0.00162624	1	protein_coding	K10486//BTB/POZ domain-containing protein 14	KAF0031543.1//hypothetical protein F2P81_016098 [Scophthalmus maximus];XP_035463262.1//nucleus accumbens-associated protein 2 [Scophthalmus maximus]
SMAX5B_012295	CP026247.1	13720523..13741160	321.536	1.10486	2.15078	0.000410548	0.00796378	1	protein_coding	K07249//retinal dehydrogenase [EC:1.2.1.36]	XP_023140974.1//retinal dehydrogenase 2 [Amphiprion ocellaris]
SMAX5B_018742	CP026251.1	3584238..3600342	23.8487	1.10473	2.15058	5.95646e-07	2.83755e-05	0.0113024	protein_coding	K20865//NACHT, LRR and PYD domains-containing protein 12	XP_035496479.1//NACHT, LRR and PYD domains-containing protein 14 isoform X1 [Scophthalmus maximus];XP_035496482.1//NACHT, LRR and PYD domains-containing protein 14 isoform X4 [Scophthalmus maximus]
SMAX5B_007876	CP026254.1	22486024..22498369	16.396	1.10332	2.14848	0.00232875	0.031632	1	protein_coding	K08119//extracellular matrix protein 2	XP_035503846.1//podocan isoform X2 [Scophthalmus maximus];XP_035503845.1//podocan isoform X1 [Scophthalmus maximus]
SMAX5B_020384	CP026260.1	10758205..10759311	336.188	1.10315	2.14823	0.00546122	0.0598016	1	protein_coding	K11275//histone H1/5	XP_035468675.1//histone H5 [Scophthalmus maximus]
SMAX5B_003043	CP026258.1	complement(1810546..1821298)	13.1786	1.10193	2.14641	0.000219799	0.00475462	1	protein_coding	K16628//collagen, type VII, alpha	AWP14907.1//putative cilia- and flagella-associated protein 44 [Scophthalmus maximus]
SMAX5B_007037	CP026245.1	complement(632832..641015)	16.8126	1.09947	2.14276	0.00733149	0.074661	1	protein_coding	K00128//aldehyde dehydrogenase (NAD+) [EC:1.2.1.3]	XP_028429520.1//aldehyde dehydrogenase, dimeric NADP-preferring-like [Perca flavescens]
SMAX5B_013723	CP026243.1	30523591..30529825	29.4498	1.09893	2.14195	1.12764e-07	6.59276e-06	0.0021397	protein_coding	K08727//nucleotide-binding oligomerization domain-containing protein 1	AWO97153.1//Nucleotide-binding oligomerization domain 1 protein [Scophthalmus maximus];XP_022606518.1//nucleotide-binding oligomerization domain-containing protein 1 [Seriola dumerili]
SMAX5B_006538	CP026249.1	16267820..16269822	52.7016	1.09805	2.14065	5.42062e-05	0.00151064	1	protein_coding	K15688//E3 ubiquitin-protein ligase MUL1 [EC:2.3.2.27]	AWP04552.1//putative mitochondrial ubiquitin ligase activator of nfkb 1-A-like [Scophthalmus maximus];XP_035490691.1//mitochondrial ubiquitin ligase activator of nfkb 1-A [Scophthalmus maximus]
SMAX5B_010168	CP026245.1	18398416..18405166	179.804	1.09728	2.13951	0.000205065	0.0045117	1	protein_coding	K16643//glia-derived nexin	XP_035478572.1//glia-derived nexin [Scophthalmus maximus]
SMAX5B_013562	CP026246.1	25092466..25103912	185.668	1.09195	2.13162	2.81104e-05	0.000870433	0.533395	protein_coding	K04552//ubiquitin-conjugating enzyme E2 L3 [EC:2.3.2.23]	XP_035480116.1//ubiquitin-conjugating enzyme E2 L3a [Scophthalmus maximus];AWP00744.1//putative ubiquitin-conjugating enzyme E2 L3-like [Scophthalmus maximus]
SMAX5B_015116	CP026258.1	complement(4149598..4152091)	37.9468	1.09125	2.13058	0.00397822	0.0478216	1	protein_coding	K01047//secretory phospholipase A2 [EC:3.1.1.4]	AWP15003.1//Phospholipase A(2) [Scophthalmus maximus]
SMAX5B_009189	CP026245.1	10961957..10969260	32.5531	1.0905	2.12948	9.12891e-05	0.00232336	1	protein_coding	K09228//KRAB domain-containing zinc finger protein	XP_022615511.1//hypermethylated in cancer 1 protein isoform X1 [Seriola dumerili];XP_022066903.1//hypermethylated in cancer 1 protein isoform X1 [Acanthochromis polyacanthus]
SMAX5B_012753	CP026244.1	complement(10794425..10825741)	30.8306	1.08915	2.12749	4.78583e-05	0.00135175	0.908112	protein_coding	K07855//Ras-related and estrogen-regulated growth inhibitor	XP_026218355.1//ras-related and estrogen-regulated growth inhibitor isoform X1 [Anabas testudineus];AWO97819.1//putative plexin-C1-like isoform 4 [Scophthalmus maximus]
SMAX5B_016634	CP026244.1	8414673..8417008	20.0027	1.0889	2.12713	0.00173138	0.0252621	1	protein_coding	K08852//serine/threonine-protein kinase/endoribonuclease IRE1 [EC:2.7.11.1 3.1.26.-]	XP_035506300.1//serine/threonine-protein kinase ppk4-like isoform X2 [Scophthalmus maximus];AWO97716.1//putative serine/threonine-protein kinase/endoribonuclease IRE1-like [Scophthalmus maximus];XP_035506292.1//uncharacterized protein LOC118319774 isoform X1 [Scophthalmus maximus]
SMAX5B_007436	CP026250.1	complement(16945479..16949023)	102.905	1.08478	2.12105	2.66511e-07	1.41921e-05	0.00505704	protein_coding	K09507//DnaJ homolog subfamily B member 1	XP_035491980.1//dnaJ homolog subfamily B member 1b [Scophthalmus maximus]
SMAX5B_020314	CP026260.1	complement(9624334..9630157)	20.1466	1.0813	2.11594	0.000466433	0.00884328	1	protein_coding	K19755//radial spoke head protein 1	XP_035469850.1//radial spoke head 10 homolog B isoform X1 [Scophthalmus maximus]
SMAX5B_000714	CP026245.1	20918330..20931063	33.2233	1.08056	2.11486	8.35976e-06	0.000302562	0.158626	protein_coding	K23707	AWO99370.1//putative SAM domain-containing protein SAMSN-1-like [Scophthalmus maximus];XP_023152589.1//SAM domain-containing protein SAMSN-1a isoform X2 [Amphiprion ocellaris]
SMAX5B_011049	CP026251.1	11238346..11240521	9.70192	1.07747	2.11033	0.00943724	0.0890519	1	protein_coding	K03914//coagulation factor II (thrombin) receptor;K17308//alpha-1-acid glycoprotein 1	AWP06952.1//Hypothetical protein SMAX5B_011049 [Scophthalmus maximus];AWP06953.1//Hypothetical protein SMAX5B_011049 [Scophthalmus maximus]
SMAX5B_013030	CP026248.1	4196380..4214265	319.817	1.07746	2.11031	0.00211551	0.0296012	1	protein_coding	K10955//mucin-2	PAA48590.1//hypothetical protein BOX15_Mlig003285g2 [Macrostomum lignano]
SMAX5B_017824	CP026252.1	complement(20868090..20873705)	70.8734	1.07696	2.10958	0.000603449	0.0108755	1	protein_coding	K05625//transglutaminase 2 [EC:2.3.2.13]	XP_035521140.1//protein-glutamine gamma-glutamyltransferase 2 [Morone saxatilis];AWP08862.1//Protein-glutamine gamma-glutamyltransferase 2 [Scophthalmus maximus]
SMAX5B_010862	CP026251.1	8251700..8252017	54.2892	1.07264	2.10328	0.00429277	0.0505543	1	protein_coding	NA	XP_035495839.1//AT-rich interactive domain-containing protein 5A [Scophthalmus maximus]
SMAX5B_015763	CP026264.1	9794536..9804921	21.7363	1.07247	2.10304	1.87174e-05	0.000604339	0.355164	protein_coding	K13338//peroxin-1	AWP21749.1//putative peroxisome biogenesis factor 1 [Scophthalmus maximus]
SMAX5B_006248	CP026249.1	complement(14512367..14514107)	67.6469	1.06811	2.09668	0.00019769	0.00437245	1	protein_coding	K16449//regulator of G-protein signaling	XP_035490555.1//regulator of G-protein signaling 21-like [Scophthalmus maximus]
SMAX5B_005166	CP026248.1	complement(7338490..7463198)	41.1295	1.06707	2.09517	0.000873839	0.0147194	1	protein_coding	K04829//acid-sensing ion channel 1	NP_001133456.1//acid-sensing ion channel 1B [Salmo salar];XP_008277490.1//PREDICTED: acid-sensing ion channel 1 isoform X1 [Stegastes partitus];AWP02494.1//Acid-sensing ion channel 1 [Scophthalmus maximus]
SMAX5B_021046	CP026261.1	complement(13763412..13769556)	61.7207	1.06511	2.09232	0.000193718	0.00430167	1	protein_coding	K11150//retinol dehydrogenase 8 [EC:1.1.1.-]	PWA17790.1//hypothetical protein CCH79_00008167 [Gambusia affinis]
SMAX5B_001925	CP026263.1	complement(9473970..9498527)	13.0961	1.06498	2.09214	0.0065924	0.0688947	1	protein_coding	K10056//junction plakoglobin;K02105//catenin beta 1	XP_035475495.1//armadillo repeat-containing protein 4 [Scophthalmus maximus];AWP20946.1//Armadillo repeat-containing protein 4 [Scophthalmus maximus]
SMAX5B_012848	CP026261.1	17891367..17893205	46.7228	1.06485	2.09196	0.0012065	0.0190776	1	protein_coding	K23731	KAF0022258.1//hypothetical protein F2P81_025484 [Scophthalmus maximus]
SMAX5B_001440	CP026244.1	complement(5428961..5432308)	369.99	1.06413	2.09091	0.000211288	0.00460504	1	protein_coding	K23573//dentin sialophosphoprotein	AWO97575.1//putative olfactory receptor 11A1-like [Scophthalmus maximus];AWO97573.1//putative placenta-specific 8 protein-like [Scophthalmus maximus]
SMAX5B_017673	CP026254.1	complement(18828783..18836617)	59.034	1.06386	2.09051	0.000379182	0.00749445	1	protein_coding	K15707//RING finger protein 170 [EC:2.3.2.27]	AWP11323.1//putative E3 ubiquitin-protein ligase RNF170-like isoform 3 [Scophthalmus maximus];XP_035502838.1//RING-HC_RNF170 domain-containing protein isoform X1 [Scophthalmus maximus];AWP11321.1//putative E3 ubiquitin-protein ligase RNF170-like [Scophthalmus maximus]
SMAX5B_004013	CP026246.1	complement(10316958..10324343)	76.957	1.06236	2.08835	3.41604e-06	0.000135354	0.0648193	protein_coding	K11875//proteasome assembly chaperone 1	AWP00076.1//putative proteasome assembly chaperone 1 isoform 2 [Scophthalmus maximus];AWP00075.1//putative proteasome assembly chaperone 1 [Scophthalmus maximus]
SMAX5B_013020	CP026261.1	139205..149011	55.1931	1.05869	2.08304	3.47407e-07	1.77689e-05	0.00659205	protein_coding	K02159//apoptosis regulator BAX	AWP18247.1//putative apoptosis regulator BAX-like isoform 2 [Scophthalmus maximus];AWP18249.1//putative apoptosis regulator BAX-like isoform 4 [Scophthalmus maximus]
SMAX5B_010478	CP026251.1	19422006..19445082	67.6026	1.05242	2.074	0.000694089	0.0122167	1	protein_coding	K00281//glycine dehydrogenase [EC:1.4.4.2]	XP_018526439.1//PREDICTED: glycine dehydrogenase (decarboxylating), mitochondrial [Lates calcarifer]
SMAX5B_019011	CP026255.1	15694813..15704467	28.2862	1.05143	2.07259	0.00475884	0.0543987	1	protein_coding	K17094//annexin A6	XP_035505135.1//annexin A6 isoform X1 [Scophthalmus maximus];XP_035505137.1//annexin A6 isoform X2 [Scophthalmus maximus]
SMAX5B_018388	CP026256.1	complement(12908518..12943598)	11.6125	1.04839	2.06822	0.0037104	0.0454073	1	protein_coding	K08738//cytochrome c;K13298//dual 3',5'-cyclic-AMP and -GMP phosphodiesterase 11 [EC:3.1.4.17 3.1.4.35]	XP_035460279.1//dual 3',5'-cyclic-AMP and -GMP phosphodiesterase 11A [Scophthalmus maximus];KAF0026398.1//hypothetical protein F2P81_021135 [Scophthalmus maximus];AWP13158.1//Dual 3'-5'-cyclic-AMP and -GMP phosphodiesterase 11A [Scophthalmus maximus]
SMAX5B_000683	CP026245.1	complement(20894487..20897785)	20.9934	1.04791	2.06753	0.00468595	0.0538144	1	protein_coding	K13073//polymeric immunoglobulin receptor	AWO99367.1//Hypothetical protein SMAX5B_000683 [Scophthalmus maximus]
SMAX5B_004149	CP026246.1	15857778..15861872	163.414	1.0475	2.06694	0.000154028	0.00358704	1	protein_coding	K21870//barrier-to-autointegration factor	XP_035481823.1//barrier-to-autointegration factor [Scophthalmus maximus]
SMAX5B_010996	CP026251.1	complement(9423410..9431182)	301.256	1.04167	2.05861	0.00287629	0.0373115	1	protein_coding	K20910//thioredoxin-interacting protein	XP_035494639.1//arrestin domain-containing protein 3a [Scophthalmus maximus];XP_020450207.1//arrestin domain-containing protein 3 isoform X2 [Monopterus albus]
SMAX5B_002262	CP026248.1	11066884..11071013	94.6515	1.0404	2.0568	0.000962596	0.0159678	1	protein_coding	K09283//high mobility group AT-hook protein 2	XP_035486388.1//high mobility group protein HMGI-C [Scophthalmus maximus]
SMAX5B_003752	CP026244.1	complement(3622229..3624532)	21.2632	1.03978	2.05591	0.000542492	0.0100232	1	protein_coding	K10652//tripartite motif-containing protein 25 [EC:2.3.2.27]	AWO97477.1//Hypothetical protein SMAX5B_003752 [Scophthalmus maximus]
SMAX5B_018641	CP026256.1	10319262..10338412	13.6453	1.03849	2.05408	7.37266e-05	0.00193834	1	protein_coding	K17592//sacsin	XP_035460824.1//sacsin isoform X1 [Scophthalmus maximus];AWP12989.1//putative sacsin-like [Scophthalmus maximus];AWP12990.1//putative sacsin-like isoform 2 [Scophthalmus maximus]
SMAX5B_015525	CP026264.1	9577093..9582937	41.3378	1.03762	2.05284	0.0037612	0.0457587	1	protein_coding	K23713;K02360//a component of the cytoplasm (encore);K04437//filamin	XP_035476377.1//cAMP-regulated phosphoprotein 21 [Scophthalmus maximus];CDQ96316.1//unnamed protein product, partial [Oncorhynchus mykiss];AWP21723.1//putative cAMP-regulated phosphoprotein 21 [Scophthalmus maximus]
SMAX5B_009272	CP026255.1	7585275..7590305	17.1926	1.03639	2.05109	0.0010202	0.0167737	1	protein_coding	K22733//magnesium transporter	XP_035505636.1//magnesium transporter NIPA2 [Scophthalmus maximus]
SMAX5B_005848	CP026249.1	complement(5266910..5282359)	1021.08	1.03585	2.05033	0.00587546	0.0631385	1	protein_coding	K08057//calreticulin	XP_035489011.1//calreticulin 3b [Scophthalmus maximus]
SMAX5B_013944	CP026258.1	12774098..12783099	22.5369	1.034	2.0477	0.00513946	0.0573678	1	protein_coding	K00509//prostaglandin-endoperoxide synthase 1 [EC:1.14.99.1]	XP_019937703.1//PREDICTED: prostaglandin G/H synthase 1-like isoform X1 [Paralichthys olivaceus]
SMAX5B_005623	CP026247.1	6042833..6060027	8.27003	1.0336	2.04713	0.00985354	0.0915848	1	protein_coding	K01245//ADP-ribosylarginine hydrolase [EC:3.2.2.19];K19953//TBC1 domain family member 6	XP_018539310.1//PREDICTED: protein ADP-ribosylarginine hydrolase-like protein 1 isoform X2 [Lates calcarifer];AWP01271.1//putative growth hormone-regulated TBC protein 1 [Scophthalmus maximus];KAF0042931.1//hypothetical protein F2P81_004268 [Scophthalmus maximus]
SMAX5B_014298	CP026248.1	16107596..16111259	410.425	1.03124	2.04378	0.000320728	0.00653214	1	protein_coding	K02729//20S proteasome subunit alpha 5 [EC:3.4.25.1]	TMS18786.1//Proteasome subunit alpha type-5 [Larimichthys crocea]
SMAX5B_020944	CP026261.1	complement(12577071..12577935)	119.153	1.02912	2.04077	0.00280244	0.036552	1	protein_coding	K06553//pre-B lymphocyte gene	KAF0032767.1//hypothetical protein F2P81_015057 [Scophthalmus maximus]
SMAX5B_018780	CP026251.1	complement(1391420..1398857)	34.0278	1.02476	2.03463	0.00023578	0.00502344	1	protein_coding	K01509//adenosinetriphosphatase [EC:3.6.1.3]	AWP06502.1//putative ectonucleoside triphosphate diphosphohydrolase 2-like [Scophthalmus maximus];AWP06503.1//putative ectonucleoside triphosphate diphosphohydrolase 2-like isoform 2 [Scophthalmus maximus]
SMAX5B_017572	CP026254.1	17288797..17292716	18.2865	1.02351	2.03287	0.0080149	0.0797247	1	protein_coding	K22257//mitochondria-eating protein	AWP11207.1//putative mitochondria-eating protein [Scophthalmus maximus]
SMAX5B_005448	CP026244.1	13076116..13085396	53.4877	1.02171	2.03032	6.34526e-05	0.00171404	1	protein_coding	K20161//DENN domain-containing protein 2	AWO97921.1//putative DENN domain-containing protein 2A-like [Scophthalmus maximus]
SMAX5B_002836	CP026262.1	complement(10599373..10601736)	22.4498	1.02125	2.02968	0.00263707	0.0350169	1	protein_coding	K04379//proto-oncogene protein c-fos	AWP19982.1//Proto-oncogene protein c-Fos [Scophthalmus maximus]
SMAX5B_003599	CP026258.1	9774291..9785945	109.351	1.02115	2.02954	7.11846e-07	3.3248e-05	0.0135073	protein_coding	K03173//TNF receptor-associated factor 2 [EC:2.3.2.27]	XP_035464621.1//TNF receptor-associated factor 2 [Scophthalmus maximus]
SMAX5B_012671	CP026247.1	13943422..13966744	43.6306	1.01977	2.0276	3.50028e-05	0.00105077	0.664177	protein_coding	K10591//E3 ubiquitin-protein ligase NEDD4 [EC:2.3.2.26]	XP_035483948.1//E3 ubiquitin-protein ligase NEDD4a isoform X2 [Scophthalmus maximus]
SMAX5B_015774	CP026264.1	complement(2092902..2093824)	33.9673	1.01576	2.02196	0.00497539	0.0561895	1	protein_coding	K00543//acetylserotonin O-methyltransferase [EC:2.1.1.4]	AWP21277.1//Hypothetical protein SMAX5B_015774 [Scophthalmus maximus];KAF3838918.1//hypothetical protein F7725_010686 [Dissostichus mawsoni]
SMAX5B_009418	CP026255.1	complement(10373587..10377511)	126.783	1.01347	2.01876	0.000463101	0.00880946	1	protein_coding	K16817//HRAS-like suppressor 3 [EC:3.1.1.32 3.1.1.4]	AWP11981.1//Retinoic acid receptor responder 3 isoform 2 [Scophthalmus maximus];AWP11980.1//Retinoic acid receptor responder 3 [Scophthalmus maximus]
SMAX5B_013145	CP026247.1	22669371..22679380	68.4245	1.01326	2.01846	0.00168283	0.024683	1	protein_coding	K11140//aminopeptidase N [EC:3.4.11.2]	KAF0043526.1//hypothetical protein F2P81_004863 [Scophthalmus maximus];XP_018553001.1//PREDICTED: aminopeptidase Ey-like [Lates calcarifer]
SMAX5B_016837	CP026257.1	11246373..11251654	84.1154	1.01266	2.01763	1.69277e-05	0.000556088	0.321204	protein_coding	K22989//integral membrane protein GPR137	AWP14262.1//putative integral membrane protein GPR137B-like [Scophthalmus maximus];XP_035461136.1//G protein-coupled receptor 137Ba [Scophthalmus maximus]
SMAX5B_014290	CP026248.1	complement(16159957..16163093)	43.9576	1.00849	2.0118	6.38745e-05	0.00172265	1	protein_coding	NA	AWP03096.1//putative bcl-2-like protein 15 [Scophthalmus maximus]
SMAX5B_018046	CP026257.1	complement(8899181..8902894)	10.4554	1.00843	2.01172	0.00709741	0.0730312	1	protein_coding	K13523//lysophosphatidic acid acyltransferase / lysophosphatidylinositol acyltransferase [EC:2.3.1.51 2.3.1.-]	TKS85442.1//1-acyl-sn-glycerol-3-phosphate acyltransferase delta [Collichthys lucidus];XP_030298053.1//1-acyl-sn-glycerol-3-phosphate acyltransferase delta isoform X2 [Sparus aurata]
SMAX5B_006154	CP026249.1	complement(5331691..5334930)	26.5205	1.00751	2.01043	0.00244648	0.0328048	1	protein_coding	K18626//trichohyalin	AWP03801.1//Hypothetical protein SMAX5B_006154 [Scophthalmus maximus]
SMAX5B_015586	CP026264.1	complement(4202463..4246449)	24.8805	1.0073	2.01015	0.00154052	0.0231438	1	protein_coding	K05465//angiopoietin 1	XP_035476714.1//angiopoietin-1 isoform X1 [Scophthalmus maximus]
SMAX5B_002951	CP026258.1	543597..547179	35.8962	1.0066	2.00917	0.00309763	0.0392985	1	protein_coding	K05468//lymphotoxin alpha (TNF superfamily, member 1);K04389//tumor necrosis factor ligand superfamily member 6;K05478//tumor necrosis factor ligand superfamily member 15	AWP14830.1//Hypothetical protein SMAX5B_002951 [Scophthalmus maximus];XP_035463303.1//uncharacterized protein LOC118284582 [Scophthalmus maximus]
SMAX5B_012165	CP026243.1	16184430..16195117	402.29	1.00553	2.00768	0.000911992	0.01528	1	protein_coding	K06578//Lutheran blood group glycoprotein;K06534//melanoma cell adhesion molecule	AWO96289.1//Ig 2 domain containing protein [Scophthalmus maximus];XP_035504003.1//uncharacterized protein si:ch211-79k12.1 [Scophthalmus maximus]
SMAX5B_019405	CP026246.1	8435714..8470299	31.2111	1.00446	2.00619	4.93375e-05	0.00138651	0.93618	protein_coding	K08011//neutrophil cytosolic factor 1	AWO99984.1//putative SH3 and PX domain-containing protein 2B [Scophthalmus maximus];XP_035480105.1//LOW QUALITY PROTEIN: SH3 and PX domain-containing protein 2B [Scophthalmus maximus]
SMAX5B_003719	CP026258.1	complement(7943815..7949117)	174.739	-1.00137	-2.00189	0.00035148	0.00704688	1	protein_coding	K08148//MFS transporter, SP family, solute carrier family 2 (facilitated glucose transporter), member 11	XP_019937450.1//PREDICTED: solute carrier family 2, facilitated glucose transporter member 11-like [Paralichthys olivaceus]
SMAX5B_019069	CP026255.1	complement(15684717..15689981)	40.3377	-1.00223	-2.0031	0.000783393	0.0134764	1	protein_coding	K13864//solute carrier family 7 (cationic amino acid transporter), member 2	XP_035506374.1//cationic amino acid transporter 2-like [Scophthalmus maximus]
SMAX5B_004554	CP026245.1	9273485..9318024	9.06031	-1.00292	-2.00405	0.00288886	0.0374454	1	protein_coding	K13675//UDP-glucose:O-linked fucose beta-1,3-glucosyltransferase [EC:2.4.1.-]	XP_005926493.1//PREDICTED: beta-1,3-glucosyltransferase [Haplochromis burtoni];XP_033486944.1//beta 3-glucosyltransferase a isoform X1 [Epinephelus lanceolatus];KAF3847494.1//hypothetical protein F7725_020522 [Dissostichus mawsoni]
SMAX5B_005091	CP026252.1	5244948..5267446	28.2453	-1.00583	-2.0081	0.00161253	0.0239673	1	protein_coding	K17253//lactadherin	XP_028286015.1//lactadherin-like isoform X2 [Parambassis ranga];XP_035497574.1//milk fat globule EGF and factor V/VIII domain containing b isoform X2 [Scophthalmus maximus];XP_035497573.1//milk fat globule EGF and factor V/VIII domain containing b isoform X1 [Scophthalmus maximus]
SMAX5B_000146	CP026262.1	complement(18519123..18521061)	53.6306	-1.00898	-2.01248	0.00211806	0.0296121	1	protein_coding	K23490//cytochrome b5	AWP20415.1//Hypothetical protein SMAX5B_000146 [Scophthalmus maximus]
SMAX5B_009126	CP026259.1	complement(2514506..2537818)	32.4036	-1.01041	-2.01448	4.44846e-06	0.000170995	0.0844095	protein_coding	K12484//Rab11 family-interacting protein 1/2/5	XP_035465530.1//rab11 family-interacting protein 1 isoform X2 [Scophthalmus maximus];AWP16030.1//putative rab11 family-interacting protein 5-like [Scophthalmus maximus];KAF0043849.1//hypothetical protein F2P81_003007 [Scophthalmus maximus];XP_035465533.1//rab11 family-interacting protein 5 isoform X4 [Scophthalmus maximus];XP_035465529.1//rab11 family-interacting protein 1 isoform X1 [Scophthalmu…
SMAX5B_004162	CP026246.1	complement(16196181..16200273)	28.0659	-1.01142	-2.01589	0.000134865	0.0032078	1	protein_coding	NA	AWP00389.1//DUF1907 domain containing protein isoform 2 [Scophthalmus maximus];AWP00388.1//DUF1907 domain containing protein [Scophthalmus maximus]
SMAX5B_012797	CP026252.1	complement(18987607..18993962)	47.3418	-1.01227	-2.01708	0.00025794	0.00539126	1	protein_coding	K01832//thromboxane-A synthase [EC:5.3.99.5]	XP_035498508.1//thromboxane-A synthase [Scophthalmus maximus]
SMAX5B_006313	CP026261.1	6305842..6317109	19.2094	-1.01358	-2.01891	0.00143954	0.0218745	1	protein_coding	NA	AWP18575.1//putative cdc42 effector protein 1 [Scophthalmus maximus]
SMAX5B_006149	CP026249.1	complement(12225000..12230743)	39.1057	-1.01596	-2.02225	0.000256673	0.00538453	1	protein_coding	K08533//RAR-related orphan receptor beta	XP_035489189.1//RAR-related orphan receptor C b [Scophthalmus maximus];AWP04232.1//putative nuclear receptor ROR-beta-like [Scophthalmus maximus]
SMAX5B_005612	CP026247.1	5755474..5761540	40.9459	-1.01833	-2.02557	0.000207146	0.00455149	1	protein_coding	K12359//ceroid-lipofuscinosis neuronal protein 6	XP_029310941.1//ceroid-lipofuscinosis neuronal protein 6 [Cottoperca gobio];AWP01254.1//putative ceroid-lipofuscinosis neuronal protein 6 [Scophthalmus maximus]
SMAX5B_015295	CP026247.1	28490248..28495297	120.335	-1.01934	-2.02699	0.000833088	0.0141422	1	protein_coding	K12494//PH and SEC7 domain-containing protein;K14361//organic solute transporter subunit beta	XP_035484979.1//uncharacterized protein si:cabz01068815.1 [Scophthalmus maximus]
SMAX5B_011459	CP026250.1	6556399..6563105	125.513	-1.01951	-2.02723	0.000421298	0.00812517	1	protein_coding	NA	XP_035493891.1//transmembrane protein 154 isoform X1 [Scophthalmus maximus];XP_035493892.1//transmembrane protein 154 isoform X2 [Scophthalmus maximus]
SMAX5B_015045	CP026248.1	26875996..27004439	5.62787	-1.02	-2.02792	0.00230195	0.0313699	1	protein_coding	K06821//plexin B	XP_019942028.1//PREDICTED: plexin-B1-like [Paralichthys olivaceus]
SMAX5B_000096	CP026262.1	16783486..16798554	175.106	-1.02021	-2.02821	4.06439e-05	0.00119031	0.771219	protein_coding	K10366//dystrophin;K14756//klotho [EC:3.2.1.31]	XP_030260924.1//dystrobrevin beta-like isoform X2 [Sparus aurata];XP_030260919.1//dystrobrevin beta-like isoform X1 [Sparus aurata];AWP20327.1//putative dystrobrevin beta-like [Scophthalmus maximus];CDQ59595.1//unnamed protein product [Oncorhynchus mykiss];KAB0375468.1//hypothetical protein FD755_012111, partial [Muntiacus reevesi]
SMAX5B_001380	CP026261.1	1162347..1171692	23.0426	-1.02176	-2.0304	0.00666057	0.0695202	1	protein_coding	K17294//tetraspanin-4	XP_035471253.1//tetraspanin-4 [Scophthalmus maximus]
SMAX5B_002988	CP026258.1	1985864..2000521	19.3255	-1.02228	-2.03113	0.00423928	0.0503087	1	protein_coding	K05080//growth hormone receptor	AWP14918.1//Growth factor receptor-2 [Scophthalmus maximus];KAF0031237.1//hypothetical protein F2P81_015792 [Scophthalmus maximus]
SMAX5B_003817	CP026245.1	16326242..16349856	23.9024	-1.02278	-2.03184	8.34193e-05	0.00214593	1	protein_coding	K18283//cGMP-dependent 3',5'-cyclic phosphodiesterase [EC:3.1.4.17]	AWO99157.1//putative cGMP-dependent 3'-5'-cyclic phosphodiesterase, partial [Scophthalmus maximus];XP_033486972.1//cGMP-dependent 3',5'-cyclic phosphodiesterase isoform X2 [Epinephelus lanceolatus]
SMAX5B_013175	CP026247.1	18499160..18503777	95.3833	-1.02361	-2.033	0.000588128	0.0106844	1	protein_coding	K12804//proline-serine-threonine phosphatase interacting protein 1	XP_035484496.1//proline-serine-threonine phosphatase-interacting protein 1-like [Scophthalmus maximus];AWP01825.1//putative proline-serine-threonine phosphatase-interacting protein 1-like [Scophthalmus maximus]
SMAX5B_011059	CP026251.1	9740173..9860932	11.8134	-1.02486	-2.03477	0.0037122	0.0454073	1	protein_coding	K08492//syntaxin 18	TMS03350.1//Protein FAM172A [Larimichthys crocea];AWP06903.1//putative protein FAM172A [Scophthalmus maximus]
SMAX5B_004402	CP026246.1	complement(30206322..30209598)	31.1588	-1.02562	-2.03584	0.00114604	0.0183552	1	protein_coding	K00799//glutathione S-transferase [EC:2.5.1.18]	XP_035482555.1//microsomal glutathione S-transferase 1-like [Scophthalmus maximus]
SMAX5B_019952	CP026245.1	complement(5490714..5515048)	15.5895	-1.02665	-2.03729	0.000105524	0.00261402	1	protein_coding	K05115//AXL receptor tyrosine kinase [EC:2.7.10.1]	AWO98611.1//putative tyrosine-protein kinase receptor UFO [Scophthalmus maximus]
SMAX5B_012071	CP026243.1	complement(19183080..19186723)	1277.79	-1.02675	-2.03744	0.00366192	0.0448907	1	protein_coding	K23771;K23761	AWO96565.1//putative ictacalcin-like [Scophthalmus maximus]
SMAX5B_001738	CP026250.1	complement(20958792..20963472)	17.4394	-1.02795	-2.03913	0.00847594	0.0826617	1	protein_coding	K06471//platelet/endothelial cell adhesion molecule	AWP06295.1//putative platelet endothelial cell adhesion molecule-like [Scophthalmus maximus]
SMAX5B_016382	CP026253.1	23034215..23045369	258.852	-1.02849	-2.03989	0.000274564	0.00568894	1	protein_coding	K00036//glucose-6-phosphate 1-dehydrogenase [EC:1.1.1.49 1.1.1.363]	AWP10268.1//glucose-6-phosphate dehydrogenase-like [Scophthalmus maximus]
SMAX5B_007942	CP026254.1	complement(20492229..20494680)	54.0445	-1.0294	-2.04117	0.00353784	0.0437223	1	protein_coding	K01109//inositol polyphosphate-4-phosphatase [EC:3.1.3.66];K01239//purine nucleosidase [EC:3.2.2.1]	XP_035502962.1//inosine-uridine preferring nucleoside hydrolase [Scophthalmus maximus]
SMAX5B_021431	CP026244.1	9113894..9119103	198.138	-1.03023	-2.04234	0.000268351	0.00557404	1	protein_coding	K00477//phytanoyl-CoA hydroxylase [EC:1.14.11.18]	AWO97744.1//putative phytanoyl-CoA dioxygenase peroxisomal [Scophthalmus maximus];XP_035466499.1//phytanoyl-CoA dioxygenase, peroxisomal [Scophthalmus maximus]
SMAX5B_006065	CP026261.1	complement(6219711..6227202)	17.6661	-1.0304	-2.04259	0.000136557	0.00323424	1	protein_coding	K19948//MICAL-like protein 1	AWP18570.1//putative MICAL-like protein 1 [Scophthalmus maximus];XP_035470850.1//MICAL-like protein 1 isoform X1 [Scophthalmus maximus]
SMAX5B_018223	CP026256.1	complement(10709214..10714828)	50.9313	-1.03043	-2.04263	9.70563e-06	0.00034383	0.184164	protein_coding	K12309//beta-galactosidase [EC:3.2.1.23]	XP_022596669.1//beta-galactosidase-like isoform X1 [Seriola dumerili]
SMAX5B_013922	CP026258.1	12330138..12346437	28.3643	-1.03132	-2.04389	0.00018713	0.00419436	1	protein_coding	K00746//chondroitin sulfate N-acetylgalactosaminyltransferase 1/2 [EC:2.4.1.174 2.4.1.175]	AWP15431.1//putative chondroitin sulfate N-acetylgalactosaminyltransferase 1 [Scophthalmus maximus];XP_033501928.1//chondroitin sulfate N-acetylgalactosaminyltransferase 1-like [Epinephelus lanceolatus];XP_021074733.1//chondroitin sulfate N-acetylgalactosaminyltransferase 1 [Mus pahari]
SMAX5B_000645	CP026245.1	19535641..19541898	34.1978	-1.03272	-2.04587	0.00889754	0.0853561	1	protein_coding	K14382//solute carrier family 5 (sodium/glucose cotransporter), member 2	XP_035478985.1//sodium/glucose cotransporter 2 isoform X1 [Scophthalmus maximus]
SMAX5B_018561	CP026256.1	complement(15511671..15516590)	17.6342	-1.03301	-2.04629	0.0011655	0.0186135	1	protein_coding	K22017//mucin-4;K21125//mucin-5AC	AWP13338.1//DUF4592 domain containing protein [Scophthalmus maximus]
SMAX5B_009875	CP026252.1	complement(16035566..16046977)	29.971	-1.03432	-2.04815	1.75529e-05	0.000574144	0.333066	protein_coding	K19464//pleckstrin homology domain-containing family G member 5;K16681//protein crumbs	XP_035499506.1//pleckstrin homology domain-containing family G member 7 isoform X2 [Scophthalmus maximus];XP_035499505.1//pleckstrin homology domain-containing family G member 7 isoform X1 [Scophthalmus maximus]
SMAX5B_022355	CP026254.1	complement(16148118..16189044)	281.791	-1.03544	-2.04974	0.00383366	0.0463504	1	protein_coding	K01319//cathepsin G [EC:3.4.21.20];K06840//semaphorin 3;K23011//serine protease 57 [EC:3.4.21.-];K01015//alcohol sulfotransferase [EC:2.8.2.2]	KAB0340318.1//hypothetical protein FD755_024760, partial [Muntiacus reevesi];AWP11146.1//putative serine protease 57 [Scophthalmus maximus];XP_035504316.1//mast cell protease 1A-like [Scophthalmus maximus];XP_035504313.1//granzyme B-like isoform X1 [Scophthalmus maximus]
SMAX5B_018500	CP026256.1	15705558..15738847	37.0562	-1.03599	-2.05052	0.000748842	0.0130025	1	protein_coding	K20685//guanine nucleotide exchange factor MCF2	XP_035031157.1//guanine nucleotide exchange factor DBS-like isoform X3 [Hippoglossus stenolepis];XP_034429330.1//guanine nucleotide exchange factor DBS-like isoform X3 [Hippoglossus hippoglossus];XP_034429333.1//guanine nucleotide exchange factor DBS-like isoform X6 [Hippoglossus hippoglossus];XP_034429328.1//guanine nucleotide exchange factor DBS-like isoform X1 [Hippoglossus hippoglossus];XP_02…
SMAX5B_022419	CP026254.1	complement(6988463..7001526)	22.3249	-1.03759	-2.0528	6.43652e-05	0.00173083	1	protein_coding	K16342//cytosolic phospholipase A2 [EC:3.1.1.4]	AWP10695.1//putative cytosolic phospholipase A2 [Scophthalmus maximus]
SMAX5B_003107	CP026264.1	complement(681621..697203)	24.1299	-1.03946	-2.05545	0.0040339	0.0483519	1	protein_coding	K01122//ectonucleotide pyrophosphatase/phosphodiesterase family member 2 [EC:3.1.4.39]	XP_035475854.1//ectonucleotide pyrophosphatase/phosphodiesterase family member 2 isoform X1 [Scophthalmus maximus];TDH03690.1//hypothetical protein EPR50_G00144610 [Perca flavescens]
SMAX5B_010369	CP026251.1	19230195..19235526	19.4801	-1.0401	-2.05637	0.00488499	0.0554527	1	protein_coding	K00699//glucuronosyltransferase [EC:2.4.1.17]	XP_022621011.1//UDP-glucuronosyltransferase 2A2-like [Seriola dumerili]
SMAX5B_003546	CP026258.1	complement(8076834..8086347)	25.5339	-1.04067	-2.05719	6.90708e-06	0.000256499	0.131062	protein_coding	K00789//S-adenosylmethionine synthetase [EC:2.5.1.6]	AWP15197.1//S-adenosylmethionine synthase [Scophthalmus maximus]
SMAX5B_011442	CP026250.1	complement(5354717..5361833)	5.9551	-1.04135	-2.05815	0.00930276	0.0880813	1	protein_coding	K11653//AT-rich interactive domain-containing protein 1;K14026//SEL1 protein;K11647//SWI/SNF-related matrix-associated actin-dependent regulator of chromatin subfamily A member 2/4 [EC:3.6.4.-]	AWP05334.1//putative storkhead-box protein 2 [Scophthalmus maximus];XP_035493167.1//storkhead-box protein 2 isoform X2 [Scophthalmus maximus]
SMAX5B_009317	CP026255.1	complement(9990655..10002407)	24.57	-1.0422	-2.05936	0.00619607	0.0658643	1	protein_coding	K14943//muscleblind	AWP11941.1//putative muscleblind-like protein 3 [Scophthalmus maximus];XP_035506589.1//muscleblind-like protein 3 isoform X8 [Scophthalmus maximus];XP_035506583.1//muscleblind-like protein 3 isoform X2 [Scophthalmus maximus];XP_035506588.1//muscleblind-like protein 3 isoform X7 [Scophthalmus maximus];XP_035506585.1//muscleblind-like protein 3 isoform X4 [Scophthalmus maximus];XP_023263101.1//musc…
SMAX5B_011705	CP026243.1	complement(26124732..26131733)	30.0836	-1.04404	-2.062	0.000956366	0.015896	1	protein_coding	K01015//alcohol sulfotransferase [EC:2.8.2.2]	XP_035485761.1//sulfotransferase family 2, cytosolic sulfotransferase 3 isoform X1 [Scophthalmus maximus];XP_035485763.1//sulfotransferase family 2, cytosolic sulfotransferase 3 isoform X2 [Scophthalmus maximus]
SMAX5B_011012	CP026251.1	11730919..11734266	379.934	-1.04405	-2.06201	0.00401568	0.048168	1	protein_coding	K00002//alcohol dehydrogenase (NADP+) [EC:1.1.1.2]	AWP06995.1//putative alcohol dehydrogenase isoform 2 [Scophthalmus maximus];AWP06994.1//putative alcohol dehydrogenase [Scophthalmus maximus];XP_022614602.1//alcohol dehydrogenase [NADP(+)] A-like isoform X1 [Seriola dumerili]
SMAX5B_011959	CP026243.1	complement(22009374..22013356)	33.8985	-1.04564	-2.06429	8.85061e-06	0.000316897	0.16794	protein_coding	K06771//myelin associated glycoprotein	AWO96813.1//putative sialoadhesin-like [Scophthalmus maximus];AWO96815.1//putative sialoadhesin-like isoform 3 [Scophthalmus maximus];AWO96816.1//putative sialoadhesin-like isoform 4 [Scophthalmus maximus];AWO96814.1//putative sialoadhesin-like isoform 2 [Scophthalmus maximus]
SMAX5B_008599	CP026257.1	16588920..16610040	36.3253	-1.0469	-2.06608	0.000114171	0.00276275	1	protein_coding	K13159//heterogeneous nuclear ribonucleoprotein L	XP_026210172.1//heterogeneous nuclear ribonucleoprotein L-like [Anabas testudineus];AWP14481.1//putative heterogeneous nuclear ribonucleoprotein L-like [Scophthalmus maximus]
SMAX5B_005664	CP026247.1	complement(5772624..5829661)	3.3302	-1.04888	-2.06893	0.00845125	0.0826394	1	protein_coding	K08622//a disintegrin and metalloproteinase with thrombospondin motifs 7 [EC:3.4.24.-]	AWP01257.1//putative disintegrin and metalloproteinase with thrombospondin motifs 7 [Scophthalmus maximus]
SMAX5B_007584	CP026250.1	complement(16425143..16457686)	137.755	-1.04933	-2.06957	0.000535472	0.00990446	1	protein_coding	K18622//adducin	XP_035492303.1//adducin 3 (gamma) a isoform X2 [Scophthalmus maximus];XP_035492305.1//adducin 3 (gamma) a isoform X4 [Scophthalmus maximus]
SMAX5B_008917	CP026255.1	12921111..12924753	1072.26	-1.04993	-2.07042	0.0087998	0.0846619	1	protein_coding	K01623//fructose-bisphosphate aldolase, class I [EC:4.1.2.13]	XP_008325304.1//fructose-bisphosphate aldolase B [Cynoglossus semilaevis]
SMAX5B_004055	CP026246.1	16208073..16216430	321.037	-1.05001	-2.07054	0.00144033	0.0218745	1	protein_coding	K01437//aspartoacylase [EC:3.5.1.15]	XP_035480303.1//aspartoacylase [Scophthalmus maximus]
SMAX5B_009883	CP026252.1	complement(11611710..11630240)	15.394	-1.05017	-2.07077	0.00361848	0.0445542	1	protein_coding	K04677//mothers against decapentaplegic homolog 6	XP_035497622.1//mothers against decapentaplegic homolog 6b [Scophthalmus maximus]
SMAX5B_009432	CP026255.1	7061364..7071522	65.3563	-1.05067	-2.07149	0.000110567	0.00270291	1	protein_coding	K23503//sideroflexin-5	XP_035505697.1//sideroflexin-5b [Scophthalmus maximus]
SMAX5B_000440	CP026259.1	complement(10953973..10975827)	27.7968	-1.0509	-2.07182	0.000179668	0.00407228	1	protein_coding	K17581//consortin	AWP16541.1//putative nutritionally-regulated adipose and cardiac enriched protein -like [Scophthalmus maximus];TMS21371.1//Consortin [Larimichthys crocea];XP_020500879.1//uncharacterized protein LOC109992550 isoform X3 [Labrus bergylta]
SMAX5B_019046	CP026255.1	complement(18233512..18244577)	11.7864	-1.05151	-2.07269	0.00998205	0.0924438	1	protein_coding	K20028//palmitoyltransferase ZDHHC2/15/20 [EC:2.3.1.225]	XP_035505364.1//palmitoyltransferase ZDHHC2 [Scophthalmus maximus]
SMAX5B_012045	CP026243.1	complement(15973090..15980639)	266.719	-1.0532	-2.07513	0.00485031	0.0551339	1	protein_coding	K07426//cytochrome P450 family 4 subfamily B polypeptide 1 [EC:1.14.14.1]	AWO96276.1//Cytochrome P450 [Scophthalmus maximus];XP_035479900.1//cytochrome P450 4B1-like [Scophthalmus maximus]
SMAX5B_017558	CP026243.1	5948143..5953379	81.2962	-1.05353	-2.0756	7.52467e-05	0.0019721	1	protein_coding	K04439//beta-arrestin	AWO95802.1//putative beta-arrestin-2 [Scophthalmus maximus];XP_035495338.1//arrestin, beta 2b isoform X1 [Scophthalmus maximus]
SMAX5B_016910	CP026259.1	complement(18852830..18884412)	20.5288	-1.05757	-2.08142	0.00467909	0.0538144	1	protein_coding	K11141//glutamyl aminopeptidase [EC:3.4.11.7]	XP_035466602.1//glutamyl aminopeptidase [Scophthalmus maximus]
SMAX5B_004023	CP026246.1	complement(12406424..12415324)	30.125	-1.05816	-2.08228	0.000180146	0.00407228	1	protein_coding	K05077//interleukin 13 receptor alpha-2	AWP00141.1//putative interleukin-13 receptor subunit alpha-2-like isoform 2 [Scophthalmus maximus];AWP00142.1//putative interleukin-13 receptor subunit alpha-2-like isoform 3 [Scophthalmus maximus];AWP00140.1//putative interleukin-13 receptor subunit alpha-2-like [Scophthalmus maximus]
SMAX5B_017538	CP026243.1	complement(6198320..6209340)	19.9341	-1.0587	-2.08305	0.00011095	0.00270784	1	protein_coding	K06706//CD248 antigen, endosialin	AWO95825.1//putative endosialin-like [Scophthalmus maximus]
SMAX5B_000488	CP026259.1	complement(11580206..11587215)	73.386	-1.06043	-2.08556	0.00141262	0.0215318	1	protein_coding	K17517//C-type lectin domain family 12 member B;K17513//C-type lectin superfamily 17 member A;K06721//C-type lectin domain family 10 member A	AWP16586.1//putative CD209 antigen-like protein 2 [Scophthalmus maximus];XP_035467304.1//LOW QUALITY PROTEIN: C-type lectin domain family 4 member M-like [Scophthalmus maximus]
SMAX5B_011259	CP026248.1	24520028..24551294	135.089	-1.06066	-2.08588	0.000385762	0.00757971	1	protein_coding	K00289//formyltetrahydrofolate dehydrogenase [EC:1.5.1.6]	AWP03465.1//putative cytosolic 10-formyltetrahydrofolate dehydrogenase-like isoform 3 [Scophthalmus maximus];AWP03464.1//putative cytosolic 10-formyltetrahydrofolate dehydrogenase-like isoform 2 [Scophthalmus maximus]
SMAX5B_022211	CP026262.1	complement(2797099..2800460)	27.8862	-1.06088	-2.0862	6.79619e-05	0.00180954	1	protein_coding	K12561//myristoylated alanine-rich C-kinase substrate	XP_035474051.1//myristoylated alanine-rich C-kinase substrate-like [Scophthalmus maximus]
SMAX5B_013833	CP026258.1	complement(13357288..13363298)	45.4653	-1.06097	-2.08633	8.66341e-06	0.00031086	0.164388	protein_coding	K00816//kynurenine---oxoglutarate transaminase / cysteine-S-conjugate beta-lyase / glutamine---phenylpyruvate transaminase [EC:2.6.1.7 4.4.1.13 2.6.1.64]	XP_035464748.1//kynurenine--oxoglutarate transaminase 1 [Scophthalmus maximus]
SMAX5B_018531	CP026256.1	3696885..3745486	53.892	-1.06127	-2.08677	3.22693e-06	0.000128165	0.0612309	protein_coding	K18080//tensin	XP_035506938.1//tensin-1 isoform X11 [Scophthalmus maximus];XP_035506949.1//tensin-1 isoform X20 [Scophthalmus maximus];AWP12770.1//putative tensin-1-like, partial [Scophthalmus maximus]
SMAX5B_010534	CP026259.1	complement(865945..867694)	36.5243	-1.06175	-2.08747	0.00202454	0.0286399	1	protein_coding	K06115//spectrin beta	AWP15960.1//putative spectrin beta chain non-erythrocytic 5-like [Scophthalmus maximus]
SMAX5B_010565	CP026244.1	complement(21445531..21461536)	198.97	-1.06392	-2.0906	0.000512534	0.00955415	1	protein_coding	K13215//nuclear receptor-interacting protein 2	XP_035467466.1//nuclear receptor-interacting protein 2 [Scophthalmus maximus]
SMAX5B_016131	CP026247.1	2529163..2536140	21.0848	-1.06449	-2.09143	0.00365171	0.0447984	1	protein_coding	K08214//MFS transporter, OCT family, solute carrier family 22 (organic cation transporter), member 18	AWP01160.1//putative solute carrier family 22 member 18 [Scophthalmus maximus]
SMAX5B_014326	CP026248.1	14379339..14411227	12.299	-1.06461	-2.09161	3.52228e-05	0.00105393	0.668352	protein_coding	K05637//laminin, alpha 1/2;K23222//nuclease HARBI1 [EC:3.1.-.-];K01904//4-coumarate--CoA ligase [EC:6.2.1.12]	XP_019942183.1//PREDICTED: disco-interacting protein 2 homolog B-A isoform X2 [Paralichthys olivaceus];XP_035004097.1//disco-interacting protein 2 homolog B-A isoform X4 [Hippoglossus stenolepis];XP_018528970.1//PREDICTED: disco-interacting protein 2 homolog B-A-like isoform X4 [Lates calcarifer];XP_018581137.2//disco-interacting protein 2 homolog B-A isoform X3 [Scleropages formosus];XP_03548679…
SMAX5B_001918	CP026263.1	complement(7131276..7132265)	49.1036	-1.06508	-2.09229	0.00604913	0.0647045	1	protein_coding	K05307//thiamine-triphosphatase [EC:3.6.1.28]	XP_035474488.1//thiamine-triphosphatase [Scophthalmus maximus]
SMAX5B_015650	CP026264.1	complement(10387842..10396847)	18.0636	-1.06829	-2.09694	0.000200352	0.00441963	1	protein_coding	K00710//polypeptide N-acetylgalactosaminyltransferase [EC:2.4.1.41]	XP_035536723.1//polypeptide N-acetylgalactosaminyltransferase 12 [Morone saxatilis];AWP21783.1//putative polypeptide N-acetylgalactosaminyltransferase 12 [Scophthalmus maximus]
SMAX5B_015583	CP026264.1	complement(6405675..6408500)	74.4502	-1.07131	-2.10133	0.000125262	0.00301735	1	protein_coding	K01489//cytidine deaminase [EC:3.5.4.5];K02939//large subunit ribosomal protein L9;K08574//calpain-5 [EC:3.4.22.-]	XP_035477231.1//39S ribosomal protein L9, mitochondrial [Scophthalmus maximus];AWP21547.1//Hypothetical protein SMAX5B_015583 [Scophthalmus maximus]
SMAX5B_021498	CP026246.1	complement(3016581..3020544)	21.4528	-1.07175	-2.10198	0.000489574	0.00918762	1	protein_coding	K09870//aquaporin-11	XP_035482617.1//aquaporin-11-like [Scophthalmus maximus]
SMAX5B_014689	CP026253.1	17400366..17436537	4.20752	-1.07215	-2.10256	0.00922694	0.0875616	1	protein_coding	K08867//WNK lysine deficient protein kinase [EC:2.7.11.1]	XP_019951727.1//PREDICTED: serine/threonine-protein kinase WNK2-like isoform X5 [Paralichthys olivaceus];XP_035500776.1//serine/threonine-protein kinase WNK2-like isoform X10 [Scophthalmus maximus];AWP09933.1//putative serine/threonine-protein kinase WNK2 [Scophthalmus maximus];XP_035500764.1//serine/threonine-protein kinase WNK2-like isoform X1 [Scophthalmus maximus]
SMAX5B_019706	CP026262.1	13037950..13070975	4.95212	-1.07232	-2.10281	0.000365395	0.0072822	1	protein_coding	K22017//mucin-4;K22016//mucin-3/17	AWP20110.1//putative fibronectin type III domain-containing protein 1 [Scophthalmus maximus];XP_035473403.1//LOW QUALITY PROTEIN: fibronectin type III domain-containing protein 1 [Scophthalmus maximus]
SMAX5B_000615	CP026245.1	complement(20573709..20584356)	24.2894	-1.07278	-2.10349	0.00115404	0.0184657	1	protein_coding	K23573//dentin sialophosphoprotein	KAF0030762.1//hypothetical protein F2P81_017493 [Scophthalmus maximus];AWO99349.1//Hypothetical protein SMAX5B_000615 [Scophthalmus maximus]
SMAX5B_003563	CP026258.1	complement(6897678..6908485)	16.5644	-1.07563	-2.10764	0.00645147	0.0679313	1	protein_coding	K16549//myomegalin	AWP15108.1//putative golgin subfamily A member 5-like [Scophthalmus maximus];XP_035488515.1//uncharacterized protein si:ch73-95l15.5 [Scophthalmus maximus]
SMAX5B_018763	CP026251.1	1471904..1475197	43.9325	-1.0778	-2.11081	0.00162553	0.0241176	1	protein_coding	K15612//rhombotin-2;K23691//serine/threonine-protein kinase N2 [EC:2.7.11.13];K21958//extracellular serine/threonine protein kinase FAM20C [EC:2.7.11.1]	EZA47853.1//F-box only protein [Ooceraea biroi];AWP06507.1//LIM domain transcription factor LMO4 [Scophthalmus maximus]
SMAX5B_004927	CP026250.1	23716008..23730156	51.7855	-1.07965	-2.11353	0.0022473	0.0308514	1	protein_coding	K17341//hemicentin	AWP06397.1//putative von Willebrand factor A domain-containing protein 7-like [Scophthalmus maximus];XP_023277909.1//von Willebrand factor A domain-containing protein 7-like [Seriola lalandi dorsalis]
SMAX5B_015155	CP026258.1	complement(2792099..2797977)	97.9005	-1.08055	-2.11485	3.22716e-05	0.000981114	0.612353	protein_coding	K14687//solute carrier family 31 (copper transporter), member 2	AWP14962.1//putative low affinity copper uptake protein 2 [Scophthalmus maximus]
SMAX5B_019916	CP026245.1	complement(7329969..7398438)	40.4432	-1.08289	-2.11827	2.0116e-05	0.000644366	0.3817	protein_coding	K00700//1,4-alpha-glucan branching enzyme [EC:2.4.1.18]	XP_035478688.1//1,4-alpha-glucan-branching enzyme [Scophthalmus maximus]
SMAX5B_018387	CP026256.1	complement(11947662..11984741)	52.2687	-1.08449	-2.12063	0.0030621	0.0389364	1	protein_coding	K06233//low density lipoprotein-related protein 2	AWP13087.1//putative low-density lipoprotein receptor-related protein 2 [Scophthalmus maximus];XP_035459878.1//LOW QUALITY PROTEIN: low-density lipoprotein receptor-related protein 2a [Scophthalmus maximus]
SMAX5B_011888	CP026243.1	complement(16836939..16844647)	451.692	-1.08619	-2.12313	0.0055297	0.0602752	1	protein_coding	K06499//carcinoembryonic antigen-related cell adhesion molecule	AWO96335.1//putative carcinoembryonic antigen-related cell adhesion molecule 5-like [Scophthalmus maximus];AWO96336.1//putative carcinoembryonic antigen-related cell adhesion molecule 5-like isoform 2 [Scophthalmus maximus]
SMAX5B_019059	CP026255.1	complement(19960564..19973608)	36.8815	-1.0897	-2.12829	1.34889e-05	0.000455653	0.255952	protein_coding	K17336//plastin-3	XP_035506072.1//plastin-3-like [Scophthalmus maximus];AWP12512.1//putative plastin-2-like isoform 2 [Scophthalmus maximus]
SMAX5B_020448	CP026260.1	complement(10476403..10489035)	8.97755	-1.09054	-2.12954	0.00417499	0.0497223	1	protein_coding	K17277//epidermal growth factor receptor kinase substrate 8	AWP17500.1//Epidermal growth factor receptor kinase substrate 8-like protein 1 [Scophthalmus maximus];XP_034427472.1//epidermal growth factor receptor kinase substrate 8-like protein 1 isoform X2 [Hippoglossus hippoglossus];XP_035468374.1//epidermal growth factor receptor kinase substrate 8-like protein 1 isoform X1 [Scophthalmus maximus];AWP17501.1//Epidermal growth factor receptor kinase substr…
SMAX5B_021057	CP026261.1	complement(8515168..8519859)	54.6661	-1.0926	-2.13257	3.56934e-05	0.00106387	0.677282	protein_coding	K12015//tripartite motif-containing protein 39 [EC:2.3.2.27]	XP_035470182.1//E3 ubiquitin-protein ligase TRIM69 isoform X1 [Scophthalmus maximus]
SMAX5B_005903	CP026249.1	10844180..10944071	8.33927	-1.09352	-2.13395	0.00517437	0.0576174	1	protein_coding	K05110//Eph receptor B1 [EC:2.7.10.1]	XP_018532268.1//PREDICTED: ephrin type-B receptor 1-B isoform X3 [Lates calcarifer];XP_029930275.1//ephrin type-B receptor 1-B isoform X2 [Myripristis murdjan]
SMAX5B_009960	CP026252.1	complement(11017096..11027448)	72.006	-1.09671	-2.13867	4.51302e-06	0.000173078	0.0856345	protein_coding	K06508//CD81 antigen	XP_035498322.1//CD81 antigen-like isoform X1 [Scophthalmus maximus];XP_035498323.1//CD81 antigen-like isoform X2 [Scophthalmus maximus]
SMAX5B_009755	CP026252.1	complement(13943153..13961811)	15.9451	-1.09974	-2.14317	0.000112051	0.00272724	1	protein_coding	K03900//von Willebrand factor	XP_022610185.1//von Willebrand factor isoform X1 [Seriola dumerili];AWP08514.1//putative von Willebrand factor isoform 2 [Scophthalmus maximus];AWP08513.1//putative von Willebrand factor [Scophthalmus maximus]
SMAX5B_004895	CP026250.1	23358275..23365790	87.0492	-1.10005	-2.14362	1.23482e-05	0.000421897	0.234307	protein_coding	K08805//doublecortin-like kinase 1/2 [EC:2.7.11.1];K09229//KRAB and SCAN domains-containing zinc finger protein;K11835//ubiquitin carboxyl-terminal hydrolase 4/11 [EC:3.4.19.12];K16340//PH domain and leucine-rich repeat-containing protein phosphatase [EC:3.1.3.16]	CDQ75208.1//unnamed protein product [Oncorhynchus mykiss];XP_001746082.1//uncharacterized protein MONBRDRAFT_32556, partial [Monosiga brevicollis MX1]
SMAX5B_001867	CP026263.1	4980994..4992635	149.855	-1.10156	-2.14587	0.000934262	0.0155751	1	protein_coding	K00814//alanine transaminase [EC:2.6.1.2]	XP_035474684.1//alanine aminotransferase 2-like [Scophthalmus maximus];AWP20763.1//Alanine aminotransferase 2-like isoform 2 [Scophthalmus maximus]
SMAX5B_002357	CP026248.1	complement(13858870..13863773)	65.4933	-1.10292	-2.14789	4.58831e-08	2.85209e-06	0.000870632	protein_coding	K05755//actin related protein 2/3 complex, subunit 4	XP_029357008.1//actin-related protein 2/3 complex subunit 4-like [Echeneis naucrates];AWP02904.1//Actin-related protein 2/3 complex subunit 4 isoform 2 [Scophthalmus maximus]
SMAX5B_011199	CP026261.1	16891574..16903556	35.484	-1.10352	-2.14878	2.98601e-05	0.000917349	0.566596	protein_coding	K05659//ATP-binding cassette, subfamily B (MDR/TAP), member 4 [EC:7.6.2.2];K12482//RUN and FYVE domain-containing protein 1	XP_029364294.1//RUN domain-containing protein 3A-like isoform X1 [Echeneis naucrates];XP_035470761.1//RUN domain-containing protein 3A isoform X2 [Scophthalmus maximus]
SMAX5B_016295	CP026249.1	24122384..24134974	15.8214	-1.1048	-2.15069	0.00044726	0.00860602	1	protein_coding	K13198//KH domain-containing, RNA-binding, signal transduction-associated protein 1	AWP04859.1//Khdrbs1 P62 Sam68 [Scophthalmus maximus]
SMAX5B_019098	CP026255.1	complement(19304495..19317881)	51.0339	-1.10608	-2.1526	1.23635e-05	0.000421897	0.234597	protein_coding	K19875//myotilin	AWP12498.1//putative myotilin [Scophthalmus maximus];XP_023279123.1//myotilin isoform X1 [Seriola lalandi dorsalis];XP_035506151.1//LOW QUALITY PROTEIN: palladin [Scophthalmus maximus]
SMAX5B_012734	CP026247.1	complement(8688832..8746505)	47.0644	-1.1079	-2.15532	0.000243688	0.00517751	1	protein_coding	K06825//fibrillin 1	AWP01367.1//putative fibrillin-1 [Scophthalmus maximus]
SMAX5B_000210	CP026262.1	complement(18521515..18524820)	116.352	-1.10906	-2.15706	4.22846e-05	0.0012275	0.80235	protein_coding	K23116//hepatocyte cell adhesion molecule;K18061//myotubularin-related protein 5/13;K23490//cytochrome b5	XP_035472856.1//uncharacterized protein LOC118289853 [Scophthalmus maximus];XP_035472855.1//uncharacterized protein LOC118289852 [Scophthalmus maximus];AWP20416.1//Hypothetical protein SMAX5B_000210 [Scophthalmus maximus]
SMAX5B_011030	CP026251.1	7018378..7024089	260.412	-1.11203	-2.16149	0.00321944	0.0405668	1	protein_coding	K14640//solute carrier family 20 (sodium-dependent phosphate transporter)	XP_035495864.1//LOW QUALITY PROTEIN: sodium-dependent phosphate transporter 1-A [Scophthalmus maximus]
SMAX5B_017845	CP026252.1	complement(21552711..21569808)	103.096	-1.11326	-2.16334	4.4063e-06	0.000170156	0.0836095	protein_coding	K01338//ATP-dependent Lon protease [EC:3.4.21.53]	XP_035498028.1//LOW QUALITY PROTEIN: lon protease homolog 2, peroxisomal [Scophthalmus maximus]
SMAX5B_010543	CP026244.1	complement(21077420..21096389)	30.1073	-1.11403	-2.1645	1.14916e-05	0.000396187	0.218053	protein_coding	K00326//cytochrome-b5 reductase [EC:1.6.2.2]	AWO98216.1//putative liprin-beta-1-like [Scophthalmus maximus];XP_035477478.1//liprin-beta-1-like [Scophthalmus maximus]
SMAX5B_012187	CP026243.1	complement(21998458..22002970)	10.9487	-1.11532	-2.16643	0.00507503	0.0569035	1	protein_coding	K20168//TBC1 domain family member 15	XP_035480918.1//TBC1 domain family member 15 [Scophthalmus maximus];AWO96811.1//putative TBC1 domain family member 15-like [Scophthalmus maximus]
SMAX5B_005693	CP026247.1	complement(5211171..5334960)	3.45812	-1.11873	-2.17156	0.00820714	0.0808746	1	protein_coding	K06766//neogenin	AWP01240.1//putative neogenin-like [Scophthalmus maximus];XP_023282474.1//neogenin isoform X9 [Seriola lalandi dorsalis];XP_018538972.1//PREDICTED: neogenin isoform X9 [Lates calcarifer];XP_018538966.1//PREDICTED: neogenin isoform X4 [Lates calcarifer];XP_035483973.1//neogenin 1a isoform X4 [Scophthalmus maximus]
SMAX5B_012301	CP026247.1	complement(7458470..7466284)	18.222	-1.11999	-2.17345	0.00785287	0.0783927	1	protein_coding	K16794//platelet-activating factor acetylhydrolase IB subunit alpha	AWP01295.1//putative WD repeat SAM and U-box domain-containing protein 1-like [Scophthalmus maximus];XP_035485020.1//WD repeat, SAM and U-box domain-containing protein 1 isoform X2 [Scophthalmus maximus]
SMAX5B_017557	CP026243.1	5972646..5981610	63.8508	-1.12002	-2.1735	1.75804e-05	0.000574144	0.333588	protein_coding	K00460//arachidonate 15-lipoxygenase [EC:1.13.11.33];K00458//arachidonate 12-lipoxygenase [EC:1.13.11.31]	KAF5154991.1//hypothetical protein HST_G00225680 [Hippoglossus stenolepis];XP_035004062.1//arachidonate 12-lipoxygenase, 12S-type isoform X2 [Hippoglossus stenolepis]
SMAX5B_009141	CP026259.1	complement(1041681..1051351)	18.9933	-1.12102	-2.175	0.00223018	0.0306668	1	protein_coding	K08551//estrogen receptor beta	AWP15965.1//zf-C4 multi-domain protein [Scophthalmus maximus]
SMAX5B_010779	CP026243.1	complement(7213267..7241738)	7.06011	-1.12245	-2.17717	0.00280728	0.0365866	1	protein_coding	K10421//CAP-Gly domain-containing linker protein 1	XP_035488590.1//CAP-Gly domain-containing linker protein 1 isoform X1 [Scophthalmus maximus];AWO95890.1//putative CAP-Gly domain-containing linker protein 1-like [Scophthalmus maximus]
SMAX5B_003413	CP026259.1	complement(15519998..15562925)	33.7762	-1.124	-2.1795	0.00108558	0.017555	1	protein_coding	K00654//serine palmitoyltransferase [EC:2.3.1.50];K00121//S-(hydroxymethyl)glutathione dehydrogenase / alcohol dehydrogenase [EC:1.1.1.284 1.1.1.1]	XP_022606511.1//serine palmitoyltransferase 2-like [Seriola dumerili];AWP16797.1//putative serine palmitoyltransferase 2-like [Scophthalmus maximus]
SMAX5B_021632	CP026244.1	4172047..4196638	16.2312	-1.12578	-2.18219	0.000610059	0.0109686	1	protein_coding	K08841//testis-specific kinase 1 [EC:2.7.12.1]	AWO97540.1//putative dual specificity testis-specific protein kinase 2-like [Scophthalmus maximus]
SMAX5B_004720	CP026247.1	complement(206349..224357)	4.7601	-1.12607	-2.18263	0.000753611	0.0130582	1	protein_coding	K23860	XP_035483614.1//uncharacterized protein plekhg4 isoform X4 [Scophthalmus maximus];AWP01017.1//putative puratrophin-1-like [Scophthalmus maximus]
SMAX5B_001088	CP026248.1	2725691..2731850	65.7586	-1.13114	-2.19032	9.9513e-06	0.000349571	0.188826	protein_coding	K10955//mucin-2;K01317//acrosin [EC:3.4.21.10]	AWP02270.1//Hypothetical protein SMAX5B_001088 [Scophthalmus maximus];XP_035486046.1//adhesive plaque matrix protein-like isoform X3 [Scophthalmus maximus];XP_035486045.1//adhesive plaque matrix protein-like isoform X2 [Scophthalmus maximus];AWP02269.1//Hypothetical protein SMAX5B_001088 [Scophthalmus maximus]
SMAX5B_011485	CP026250.1	10102412..10113686	42.391	-1.13324	-2.19351	6.07344e-05	0.00165471	1	protein_coding	K14463//microsomal triglyceride transfer protein large subunit	XP_035515760.1//microsomal triglyceride transfer protein large subunit [Morone saxatilis]
SMAX5B_003661	CP026258.1	8071041..8075882	348.943	-1.13661	-2.19863	0.000429678	0.00827724	1	protein_coding	K12382//saposin	AWP15196.1//putative prosaposin-like isoform 3 [Scophthalmus maximus];AWP15194.1//putative prosaposin-like [Scophthalmus maximus];AWP15195.1//putative prosaposin-like isoform 2 [Scophthalmus maximus]
SMAX5B_002645	CP026253.1	complement(6441835..6443605)	22.4074	-1.13693	-2.19912	0.00746844	0.0755473	1	protein_coding	NA	AWP09306.1//putative small integral membrane protein 1 [Scophthalmus maximus]
SMAX5B_018529	CP026256.1	10775709..10779250	25.3889	-1.13705	-2.19931	0.00346468	0.0430088	1	protein_coding	K12160//small ubiquitin-related modifier;K04437//filamin	XP_035507512.1//PTTG1 interacting protein b [Scophthalmus maximus]
SMAX5B_021007	CP026261.1	8551165..8560472	46.9948	-1.1376	-2.20015	4.98366e-07	2.4366e-05	0.0094565	protein_coding	K07914//Ras-related protein Rab-37	XP_035470564.1//ras-related protein Rab-37 isoform X1 [Scophthalmus maximus]
SMAX5B_022029	CP026243.1	complement(10309395..10312956)	98.1616	-1.13787	-2.20056	4.04459e-05	0.00118857	0.767461	protein_coding	K07605//type II keratin, basic	XP_035485629.1//intermediate filament protein ON3-like isoform X3 [Scophthalmus maximus];AWO96024.1//putative keratin type II cytoskeletal 8-like [Scophthalmus maximus];XP_035485628.1//intermediate filament protein ON3-like isoform X2 [Scophthalmus maximus]
SMAX5B_020103	CP026260.1	complement(11840764..11854573)	142.67	-1.13812	-2.20094	0.00113276	0.0181949	1	protein_coding	K06462//integrin alpha X;K06461//integrin alpha M	XP_035467882.1//integrin alpha-M-like isoform X1 [Scophthalmus maximus];AWP17632.1//putative integrin alpha-M-like [Scophthalmus maximus]
SMAX5B_006946	CP026249.1	complement(25787689..25793371)	173.292	-1.13847	-2.20147	0.00148329	0.0224453	1	protein_coding	K05334//solute carrier family 6 (neurotransmitter transporter) member 19	XP_026156499.1//sodium-dependent neutral amino acid transporter B(0)AT1-like [Mastacembelus armatus]
SMAX5B_018452	CP026256.1	complement(7079791..7135459)	18.6452	-1.14064	-2.20479	1.81073e-05	0.000587909	0.343587	protein_coding	K10356//myosin I	XP_018560334.1//PREDICTED: unconventional myosin-Ib isoform X2 [Lates calcarifer];XP_023135820.1//unconventional myosin-Ib isoform X3 [Amphiprion ocellaris];XP_018560338.1//PREDICTED: unconventional myosin-Ib isoform X6 [Lates calcarifer]
SMAX5B_011995	CP026243.1	20601871..20636378	10.5879	-1.14199	-2.20685	0.000588499	0.0106844	1	protein_coding	K06584//integrin alpha 8	AWO96674.1//putative integrin alpha-8 [Scophthalmus maximus];XP_029215625.1//SAG-related sequence [Besnoitia besnoiti]
SMAX5B_008800	CP026257.1	complement(13796552..13881555)	21.7429	-1.14633	-2.2135	0.000827756	0.0140803	1	protein_coding	K01106//inositol-1,4,5-trisphosphate 5-phosphatase [EC:3.1.3.56]	XP_028323495.1//type I inositol 1,4,5-trisphosphate 5-phosphatase isoform X2 [Gouania willdenowi];XP_011601156.1//type I inositol 1,4,5-trisphosphate 5-phosphatase isoform X1 [Takifugu rubripes]
SMAX5B_017751	CP026257.1	complement(19861664..19868357)	23.6669	-1.14706	-2.21463	0.000933167	0.0155723	1	protein_coding	K22523//sulfotransferase 6B1 [EC:2.8.2.-]	AWP14641.1//putative sulfotransferase 6B1 [Scophthalmus maximus];XP_032209597.1//sulfotransferase 6B1 [Mustela erminea]
SMAX5B_008974	CP026259.1	complement(4667119..4672302)	5.55106	-1.15143	-2.22133	0.00586355	0.0630511	1	protein_coding	K10571//de-etiolated-1;K14636//MFS transporter, DHA1 family, solute carrier family 18 (vesicular acetylcholine transporter), member 3;K08155//MFS transporter, DHA1 family, solute carrier family 18 (vesicular amine transporter), member 1/2	XP_026181596.1//MFS-type transporter SLC18B1 [Mastacembelus armatus];AWP16183.1//putative MFS-type transporter SLC18B1 [Scophthalmus maximus];AWP16185.1//putative MFS-type transporter SLC18B1 isoform 3 [Scophthalmus maximus]
SMAX5B_013502	CP026245.1	complement(11120845..11146431)	140.835	-1.15264	-2.2232	0.000660325	0.0116963	1	protein_coding	K01389//neprilysin [EC:3.4.24.11]	XP_033488006.1//neprilysin-like isoform X1 [Epinephelus lanceolatus];AWO98887.1//putative neprilysin [Scophthalmus maximus]
SMAX5B_015494	CP026259.1	19004849..19012710	231.603	-1.15285	-2.22352	0.00112378	0.0181028	1	protein_coding	K22210//D-glutamate cyclase [EC:4.2.1.48]	XP_035465797.1//D-glutamate cyclase, mitochondrial isoform X2 [Scophthalmus maximus];XP_008819962.1//D-glutamate cyclase, mitochondrial [Nannospalax galili];AWP16916.1//putative UPF0317 protein C14orf159 -like mitochondrial isoform 2 [Scophthalmus maximus]
SMAX5B_010158	CP026245.1	16733081..16748005	13.2787	-1.15439	-2.22591	0.00847346	0.0826617	1	protein_coding	NA	AWO99184.1//putative PTB-containing cubilin and LRP1-interacting protein [Scophthalmus maximus];XP_033085855.1//PTB-containing, cubilin and LRP1-interacting protein isoform X4 [Trachypithecus francoisi]
SMAX5B_007645	CP026259.1	20990652..20999411	121.313	-1.15822	-2.23182	1.7689e-05	0.000576354	0.335649	protein_coding	K13912//deleted in malignant brain tumors 1 protein;K15212//TATA box-binding protein-associated factor RNA polymerase I subunit A	XP_019958621.1//PREDICTED: HHIP-like protein 1 [Paralichthys olivaceus]
SMAX5B_016538	CP026251.1	complement(14942986..14953023)	13.526	-1.16139	-2.23673	0.00118688	0.0188648	1	protein_coding	K04497//groucho	XP_035496400.1//transducin-like enhancer protein 1 isoform X4 [Scophthalmus maximus];XP_035496399.1//transducin-like enhancer protein 1 isoform X3 [Scophthalmus maximus];XP_035496397.1//transducin-like enhancer protein 1 isoform X1 [Scophthalmus maximus]
SMAX5B_012454	CP026246.1	complement(5212798..5219735)	174.603	-1.16211	-2.23784	6.09253e-05	0.00165471	1	protein_coding	K00128//aldehyde dehydrogenase (NAD+) [EC:1.2.1.3]	XP_034462873.1//aldehyde dehydrogenase family 3 member A2b isoform X1 [Hippoglossus hippoglossus]
SMAX5B_000183	CP026262.1	16357615..16368601	24.3519	-1.16252	-2.23849	0.00040774	0.00791849	1	protein_coding	K08551//estrogen receptor beta	AWP20310.1//ERbeta N multi-domain protein [Scophthalmus maximus]
SMAX5B_021220	CP026247.1	complement(29050122..29062595)	10.9204	-1.16309	-2.23936	0.000448454	0.00860918	1	protein_coding	K07611//lamin B;K12641//lamin A/C	AWP02154.1//putative lamin-L(III)-like [Scophthalmus maximus];AWP02157.1//putative lamin-L(III)-like isoform 4 [Scophthalmus maximus];AWP02159.1//putative lamin-L(III)-like isoform 6 [Scophthalmus maximus];AWP02156.1//putative lamin-L(III)-like isoform 3 [Scophthalmus maximus];AWP02155.1//putative lamin-L(III)-like isoform 2 [Scophthalmus maximus]
SMAX5B_014119	CP026248.1	complement(16851172..16870968)	17.789	-1.16502	-2.24236	2.53762e-05	0.000790159	0.481513	protein_coding	K23860	AWP03134.1//pleckstrin -likey domain containing family G (with RhoGef domain) member 4 [Scophthalmus maximus];XP_035486881.1//uncharacterized protein KIAA1755-like isoform X1 [Scophthalmus maximus]
SMAX5B_020936	CP026261.1	complement(12484080..12488052)	15.0385	-1.16648	-2.24464	0.000501719	0.00940498	1	protein_coding	K12006//tripartite motif-containing protein 16	AWP18991.1//putative tripartite motif-containing protein 16-like [Scophthalmus maximus]
SMAX5B_019185	CP026255.1	complement(2966453..3072368)	2.02818	-1.16907	-2.24867	0.00102305	0.0167874	1	protein_coding	K16669//protocadherin Fat 4	AWP11673.1//putative protocadherin Fat 4 [Scophthalmus maximus]
SMAX5B_012167	CP026243.1	complement(22645699..22654438)	36.9253	-1.17024	-2.25049	4.7153e-06	0.00018001	0.0894728	protein_coding	K03145//transcription elongation factor S-II	XP_035491745.1//transcription elongation factor A protein 3 isoform X3 [Scophthalmus maximus];AWO96853.1//putative transcription elongation factor A protein 3 isoform 2 [Scophthalmus maximus];AWO96854.1//putative transcription elongation factor A protein 3 isoform 3 [Scophthalmus maximus];XP_035491771.1//transcription elongation factor A protein 3 isoform X6 [Scophthalmus maximus];AWO96852.1//put…
SMAX5B_018189	CP026256.1	16729847..16829382	7.30466	-1.17361	-2.25576	0.00277645	0.0362979	1	protein_coding	K10955//mucin-2;K12875//apoptotic chromatin condensation inducer in the nucleus	XP_035506853.1//dachshund d isoform X5 [Scophthalmus maximus];AWP13414.1//putative dachshund -like 1 [Scophthalmus maximus];KAF0026674.1//hypothetical protein F2P81_021411 [Scophthalmus maximus]
SMAX5B_006455	CP026249.1	16203326..16210792	125.884	-1.17716	-2.26132	6.69764e-05	0.00178614	1	protein_coding	K05857//phosphatidylinositol phospholipase C, delta [EC:3.1.4.11]	XP_018533001.1//PREDICTED: 1-phosphatidylinositol 4,5-bisphosphate phosphodiesterase delta-1-like isoform X2 [Lates calcarifer];XP_019960064.1//PREDICTED: 1-phosphatidylinositol 4,5-bisphosphate phosphodiesterase delta-1-like isoform X1 [Paralichthys olivaceus];XP_019960073.1//PREDICTED: 1-phosphatidylinositol 4,5-bisphosphate phosphodiesterase delta-1-like isoform X2 [Paralichthys olivaceus];XP_…
SMAX5B_006439	CP026249.1	complement(7630856..7698505)	4.72427	-1.1779	-2.26247	0.00143685	0.0218613	1	protein_coding	K12491//Arf-GAP with GTPase, ANK repeat and PH domain-containing protein 1/3/4/5/6/9/11	XP_035489085.1//arf-GAP with GTPase, ANK repeat and PH domain-containing protein 3 isoform X3 [Scophthalmus maximus];AWP03950.1//putative arf-GAP with GTPase ANK repeat and PH domain-containing protein 3 [Scophthalmus maximus];XP_035489082.1//arf-GAP with GTPase, ANK repeat and PH domain-containing protein 3 isoform X1 [Scophthalmus maximus];XP_035489086.1//uncharacterized protein agap3 isoform X…
SMAX5B_010344	CP026251.1	complement(19944391..19950502)	27.8906	-1.17874	-2.26379	0.00445593	0.0520518	1	protein_coding	K10955//mucin-2	KYQ90812.1//hypothetical protein DLAC_07681 [Tieghemostelium lacteum];XP_027043110.1//uncharacterized protein LOC113671094 [Pocillopora damicornis]
SMAX5B_020145	CP026260.1	complement(11899226..11903973)	75.0783	-1.18184	-2.26866	0.00016133	0.00372596	1	protein_coding	K11394//hydroxyproline dehydrogenase [EC:1.5.5.3]	AWP17640.1//putative proline dehydrogenase 2 isoform 2 [Scophthalmus maximus];AWP17639.1//putative proline dehydrogenase 2 [Scophthalmus maximus]
SMAX5B_000023	CP026262.1	16453542..16463723	8.1454	-1.18194	-2.26881	0.00473829	0.0542663	1	protein_coding	K03626//nascent polypeptide-associated complex subunit alpha	AWP20315.1//putative GRB2-associated and regulator of MAPK protein-like [Scophthalmus maximus]
SMAX5B_000385	CP026259.1	11504672..11507461	35.3233	-1.18219	-2.26921	0.000100954	0.00251948	1	protein_coding	K01800//maleylacetoacetate isomerase [EC:5.2.1.2]	AWP16565.1//Maleylacetoacetate isomerase [Scophthalmus maximus];AWP16567.1//Maleylacetoacetate isomerase isoform 3 [Scophthalmus maximus];AWP16566.1//Maleylacetoacetate isomerase isoform 2 [Scophthalmus maximus]
SMAX5B_013930	CP026258.1	complement(15786979..15793893)	10.9397	-1.18297	-2.27043	0.00665715	0.0695202	1	protein_coding	K05075//interleukin 21 receptor	AWP15616.1//putative interleukin-21 receptor-like [Scophthalmus maximus];XP_035464596.1//interleukin 21 receptor, tandem duplicate 1 [Scophthalmus maximus]
SMAX5B_014649	CP026253.1	complement(11806824..11808549)	144.076	-1.18465	-2.27308	4.53949e-05	0.0012931	0.861369	protein_coding	NA	AWP09588.1//Hypothetical protein SMAX5B_014649 [Scophthalmus maximus]
SMAX5B_016286	CP026249.1	25026559..25034765	32.6607	-1.18673	-2.27636	0.000224262	0.00483232	1	protein_coding	K12343//3-oxo-5-alpha-steroid 4-dehydrogenase 1 [EC:1.3.1.22]	AWP04888.1//putative 3-oxo-5-alpha-steroid 4-dehydrogenase 1 isoform 3 [Scophthalmus maximus];XP_035490314.1//3-oxo-5-alpha-steroid 4-dehydrogenase 1 [Scophthalmus maximus]
SMAX5B_009745	CP026252.1	14008271..14017987	9.77294	-1.18772	-2.27793	0.00980616	0.0913475	1	protein_coding	K16910//receptor-type tyrosine-protein phosphatase Q [EC:3.1.3.48]	AWP08523.1//putative phosphatidylinositol phosphatase PTPRQ [Scophthalmus maximus]
SMAX5B_003415	CP026259.1	complement(14054302..14061748)	71.5293	-1.18795	-2.27828	0.00142212	0.0216569	1	protein_coding	K00683//glutaminyl-peptide cyclotransferase [EC:2.3.2.5]	AWP16720.1//putative glutaminyl-peptide cyclotransferase [Scophthalmus maximus]
SMAX5B_005700	CP026251.1	553425..581427	8.37103	-1.18933	-2.28047	0.00538573	0.0592855	1	protein_coding	K00280//lysyl oxidase-like protein 2/3/4 [EC:1.4.3.-]	KAF0033732.1//hypothetical protein F2P81_013798 [Scophthalmus maximus];XP_018525051.1//PREDICTED: lysyl oxidase homolog 2 [Lates calcarifer];XP_019949108.1//PREDICTED: lysyl oxidase homolog 2 isoform X1 [Paralichthys olivaceus]
SMAX5B_022130	CP026262.1	111068..112234	36.5512	-1.19131	-2.2836	0.00145703	0.0220879	1	protein_coding	K07372//gap junction alpha-1 protein	XP_035473976.1//gap junction alpha-1 protein [Scophthalmus maximus]
SMAX5B_004459	CP026244.1	811083..821202	106.673	-1.19368	-2.28736	9.08808e-07	4.18628e-05	0.0172446	protein_coding	K05681//ATP-binding cassette, subfamily G (WHITE), member 2	AWO97261.1//putative ATP-binding cassette sub-family G member 2-like [Scophthalmus maximus];XP_035462612.1//broad substrate specificity ATP-binding cassette transporter ABCG2-like [Scophthalmus maximus]
SMAX5B_005980	CP026249.1	complement(9381653..9403260)	29.235	-1.19485	-2.28922	0.000477341	0.00901626	1	protein_coding	K07200//5'-AMP-activated protein kinase, regulatory gamma subunit	AWP04039.1//putative 5'-AMP-activated protein kinase subunit gamma-1-like [Scophthalmus maximus]
SMAX5B_009885	CP026252.1	complement(15925986..15928737)	27.5938	-1.19937	-2.29639	0.000219803	0.00475462	1	protein_coding	K14648//poly(U)-specific endoribonuclease [EC:3.1.-.-]	XP_035497696.1//poly(U)-specific endoribonuclease-C isoform X2 [Scophthalmus maximus];KAF0041266.1//hypothetical protein F2P81_007164 [Scophthalmus maximus]
SMAX5B_008200	CP026262.1	8712981..8723432	73.1349	-1.20526	-2.30579	8.25614e-07	3.81356e-05	0.015666	protein_coding	K08869//aarF domain-containing kinase	XP_035473826.1//atypical kinase COQ8A, mitochondrial [Scophthalmus maximus]
SMAX5B_002762	CP026251.1	complement(24454000..24456495)	29.1959	-1.2067	-2.3081	0.00264506	0.0350737	1	protein_coding	K17917//sorting nexin-1/2	XP_034451237.1//sorting nexin-2 isoform X2 [Hippoglossus hippoglossus];XP_035495835.1//sorting nexin-2 [Scophthalmus maximus];AWP07723.1//Sorting nexin-2, partial [Scophthalmus maximus]
SMAX5B_018085	CP026257.1	6349840..6357320	54.2896	-1.20724	-2.30895	9.36559e-05	0.00237641	1	protein_coding	K00461//arachidonate 5-lipoxygenase [EC:1.13.11.34]	XP_018533734.1//PREDICTED: arachidonate 5-lipoxygenase [Lates calcarifer]
SMAX5B_006732	CP026256.1	complement(3498038..3502750)	30.3482	-1.20752	-2.3094	0.00858343	0.083347	1	protein_coding	K00546//histamine N-methyltransferase [EC:2.1.1.8];K22437//carnosine N-methyltransferase [EC:2.1.1.22]	AWP12763.1//putative histamine N-methyltransferase A-like isoform 3 [Scophthalmus maximus];AWP12761.1//putative histamine N-methyltransferase A-like [Scophthalmus maximus]
SMAX5B_001557	CP026263.1	complement(10070551..10109713)	26.9065	-1.2089	-2.31161	9.20221e-06	0.000328081	0.174612	protein_coding	K20636//Rho GTPase-activating protein 12/27	XP_035475329.1//rho GTPase-activating protein 12b isoform X2 [Scophthalmus maximus];XP_018529155.1//PREDICTED: LOW QUALITY PROTEIN: rho GTPase-activating protein 12 [Lates calcarifer];XP_035475331.1//rho GTPase-activating protein 12b isoform X4 [Scophthalmus maximus];XP_035475330.1//rho GTPase-activating protein 12b isoform X3 [Scophthalmus maximus];XP_035475328.1//rho GTPase-activating protein 1…
SMAX5B_012441	CP026247.1	11242913..11246152	106.124	-1.2099	-2.31321	1.14197e-07	6.63016e-06	0.00216689	protein_coding	K00008//L-iditol 2-dehydrogenase [EC:1.1.1.14]	XP_035483587.1//sorbitol dehydrogenase isoform X1 [Scophthalmus maximus]
SMAX5B_005771	CP026249.1	complement(14781604..14787306)	36.9743	-1.21289	-2.31801	1.99381e-06	8.33461e-05	0.0378325	protein_coding	K00149//aldehyde dehydrogenase family 9 member A1 [EC:1.2.1.47 1.2.1.3]	XP_018532823.1//PREDICTED: aldehyde dehydrogenase family 9 member A1-B-like isoform X1 [Lates calcarifer]
SMAX5B_016591	CP026251.1	complement(12815316..12818643)	45.9528	-1.21371	-2.31933	2.43353e-05	0.000762004	0.461762	protein_coding	K13347//peroxisomal membrane protein 2	AWP07076.1//putative peroxisomal membrane protein 2 isoform 3 [Scophthalmus maximus];AWP07075.1//putative peroxisomal membrane protein 2 isoform 2 [Scophthalmus maximus];XP_035494971.1//peroxisomal membrane protein 2 [Scophthalmus maximus]
SMAX5B_022686	CP026243.1	complement(8190290..8202855)	23.1418	-1.21655	-2.3239	0.00551743	0.0602199	1	protein_coding	K23575//insulin-like growth factor-binding protein 2	AWO95911.1//putative insulin-like growth factor-binding protein 2 [Scophthalmus maximus]
SMAX5B_019335	CP026251.1	complement(23835938..23942825)	15.8924	-1.21841	-2.3269	0.0013595	0.0210045	1	protein_coding	K23379//extracelluar matrix protein FRAS1	XP_018529185.1//PREDICTED: extracellular matrix protein FRAS1 isoform X2 [Lates calcarifer];AWP07675.1//putative extracellular matrix protein FRAS1 [Scophthalmus maximus]
SMAX5B_021033	CP026261.1	complement(10666420..10680771)	24.5189	-1.21972	-2.32901	6.42694e-06	0.000240953	0.121951	protein_coding	K02602//cytoplasmic polyadenylation element-binding protein;K23573//dentin sialophosphoprotein	AWP18880.1//DUF2404 domain containing protein [Scophthalmus maximus]
SMAX5B_000279	CP026259.1	12520859..12557985	10.5954	-1.22044	-2.33017	8.531e-05	0.00218449	1	protein_coding	K10367//formin 1	AWP16640.1//putative formin-1-like [Scophthalmus maximus];XP_035024493.1//LOW QUALITY PROTEIN: formin-like [Hippoglossus stenolepis];XP_035465434.1//formin-1-like isoform X2 [Scophthalmus maximus];XP_033498775.1//formin-like isoform X2 [Epinephelus lanceolatus]
SMAX5B_007120	CP026256.1	complement(137381..141784)	8.63672	-1.2224	-2.33334	0.00720108	0.0737802	1	protein_coding	K09573//FK506-binding protein 7 [EC:5.2.1.8]	XP_035460610.1//peptidyl-prolyl cis-trans isomerase FKBP7 [Scophthalmus maximus]
SMAX5B_001895	CP026250.1	18101456..18121100	331.724	-1.22308	-2.33444	0.000599164	0.0108309	1	protein_coding	K07604//type I keratin, acidic	XP_023277755.1//keratin, type I cytoskeletal 13-like [Seriola lalandi dorsalis];AWP06134.1//putative keratin type I cytoskeletal 14-like isoform 3 [Scophthalmus maximus];AWP06132.1//putative keratin type I cytoskeletal 14-like [Scophthalmus maximus];AWP06133.1//putative keratin type I cytoskeletal 14-like isoform 2 [Scophthalmus maximus]
SMAX5B_006506	CP026249.1	complement(9293376..9338083)	38.3957	-1.22343	-2.33501	0.000153928	0.00358704	1	protein_coding	K06240//laminin, alpha 3/5	XP_022624427.1//laminin subunit alpha-3 [Seriola dumerili];XP_035490125.1//laminin subunit alpha-3-like isoform X3 [Scophthalmus maximus];KAF0046927.1//hypothetical protein F2P81_000560 [Scophthalmus maximus]
SMAX5B_018553	CP026256.1	5961782..5965849	106.648	-1.22359	-2.33528	0.000108379	0.00266893	1	protein_coding	NA	XP_035459993.1//putative methyltransferase DDB_G0268948 isoform X1 [Scophthalmus maximus]
SMAX5B_010345	CP026251.1	18409587..18417051	35.9882	-1.22442	-2.33661	1.49976e-05	0.000498558	0.284579	protein_coding	K04557//septin 5	AWP07401.1//Hypothetical protein SMAX5B_010345 [Scophthalmus maximus];XP_033947387.1//septin 5a isoform X1 [Pseudochaenichthys georgianus];XP_026076075.1//septin-5 isoform X2 [Carassius auratus]
SMAX5B_018545	CP026256.1	complement(10627233..10635517)	18.8276	-1.22779	-2.34207	0.000138962	0.00327266	1	protein_coding	K07514//enoyl-CoA hydratase / 3-hydroxyacyl-CoA dehydrogenase / 3,2-trans-enoyl-CoA isomerase [EC:4.2.1.17 1.1.1.35 5.3.3.8]	AWP13011.1//putative peroxisomal bifunctional enzyme [Scophthalmus maximus]
SMAX5B_019525	CP026253.1	23400770..23463217	6.63724	-1.23332	-2.35108	0.000780607	0.0134424	1	protein_coding	K06825//fibrillin 1	XP_029974041.1//signal peptide, CUB and EGF-like domain-containing protein 3 isoform X2 [Salarias fasciatus];XP_023262034.1//signal peptide, CUB and EGF-like domain-containing protein 3 isoform X1 [Seriola lalandi dorsalis];AWP10290.1//putative signal peptide CUB and EGF-like domain-containing protein 3, partial [Scophthalmus maximus];XP_034066885.1//signal peptide, CUB and EGF-like domain-contai…
SMAX5B_007149	CP026252.1	complement(4597440..4638785)	43.2898	-1.23467	-2.35328	1.70222e-06	7.22405e-05	0.0322996	protein_coding	K03068//low density lipoprotein receptor-related protein 5/6	AWP07977.1//putative low-density lipoprotein receptor-related protein 5 [Scophthalmus maximus]
SMAX5B_013612	CP026246.1	24974897..24989135	170.556	-1.23531	-2.35432	0.000112527	0.00273482	1	protein_coding	K16302//metal transporter CNNM	AWP00739.1//putative metal transporter CNNM3 [Scophthalmus maximus];XP_035481376.1//metal transporter CNNM3 isoform X1 [Scophthalmus maximus];AWP00740.1//putative metal transporter CNNM3 isoform 2 [Scophthalmus maximus]
SMAX5B_018945	CP026255.1	15237997..15240509	5.33933	-1.23532	-2.35433	0.00572911	0.062057	1	protein_coding	K04205//neuropeptide Y receptor type 2	AWP12288.1//putative neuropeptide Y receptor type 2-like [Scophthalmus maximus]
SMAX5B_011412	CP026250.1	complement(7567521..7598077)	19.9526	-1.23658	-2.3564	7.25429e-05	0.00191929	1	protein_coding	K06231//hedgehog interacting protein	XP_035493445.1//hedgehog-interacting protein isoform X1 [Scophthalmus maximus]
SMAX5B_008126	CP026262.1	4191205..4192839	17.4045	-1.24105	-2.3637	0.00124469	0.019616	1	protein_coding	K03907//thrombomodulin	XP_035473415.1//thrombomodulin [Scophthalmus maximus]
SMAX5B_008576	CP026257.1	complement(14521162..14525789)	124.259	-1.24159	-2.36458	1.05075e-05	0.000367177	0.19938	protein_coding	K00452//3-hydroxyanthranilate 3,4-dioxygenase [EC:1.13.11.6]	XP_035461860.1//3-hydroxyanthranilate 3,4-dioxygenase [Scophthalmus maximus]
SMAX5B_003690	CP026258.1	complement(8058932..8064501)	994.796	-1.24224	-2.36565	0.00639615	0.0674338	1	protein_coding	K10788//eosinophil peroxidase [EC:1.11.1.7]	KAF0031416.1//hypothetical protein F2P81_015971 [Scophthalmus maximus];AWP15193.1//putative eosinophil peroxidase-like isoform 2 [Scophthalmus maximus]
SMAX5B_006795	CP026246.1	complement(7046573..7050408)	212.942	-1.24228	-2.36571	6.64831e-05	0.00177582	1	protein_coding	K20735//arachidonate 5-lipoxygenase-activating protein	AWO99937.1//putative arachidonate 5-lipoxygenase-activating protein [Scophthalmus maximus]
SMAX5B_000720	CP026245.1	complement(21228868..21248620)	41.4965	-1.24321	-2.36724	0.000104791	0.00260359	1	protein_coding	K12309//beta-galactosidase [EC:3.2.1.23]	AWO99389.1//putative beta-galactosidase-1-like protein 2 [Scophthalmus maximus];AWO99390.1//putative beta-galactosidase-1-like protein 2 isoform 2 [Scophthalmus maximus]
SMAX5B_008915	CP026255.1	13130823..13139505	120.254	-1.24356	-2.36782	0.000785908	0.0135058	1	protein_coding	K14683//solute carrier family 34 (sodium-dependent phosphate cotransporter)	AWP12160.1//putative sodium-dependent phosphate transport protein 2A [Scophthalmus maximus]
SMAX5B_003668	CP026258.1	8034618..8040459	30.7498	-1.2464	-2.37249	3.4597e-05	0.00104046	0.656478	protein_coding	K10106//vitamin K-dependent gamma-carboxylase [EC:4.1.1.90]	XP_035463169.1//vitamin K-dependent gamma-carboxylase [Scophthalmus maximus]
SMAX5B_001162	CP026256.1	18325709..18339799	15.9391	-1.24809	-2.37527	0.000164996	0.00378968	1	protein_coding	K14637//solute carrier family 15 (oligopeptide transporter), member 2	XP_035507405.1//LOW QUALITY PROTEIN: solute carrier family 15 member 2 [Scophthalmus maximus];AWP13488.1//putative solute carrier family 15 member 2 [Scophthalmus maximus];AWP13489.1//putative solute carrier family 15 member 2 isoform 2 [Scophthalmus maximus]
SMAX5B_014146	CP026248.1	18152704..18156523	20.6831	-1.25556	-2.3876	4.4563e-05	0.00127592	0.845583	protein_coding	K16605//tubulin polyglutamylase complex subunit 2	AWP03194.1//putative tubulin polyglutamylase complex subunit 2 [Scophthalmus maximus]
SMAX5B_021526	CP026246.1	complement(3200822..3207009)	64.708	-1.25639	-2.38898	6.99122e-10	5.93402e-08	1.32658e-05	protein_coding	K05090//macrophage colony-stimulating factor 1 receptor [EC:2.7.10.1]	AWO99725.1//putative macrophage colony-stimulating factor 1 receptor 2-like [Scophthalmus maximus]
SMAX5B_013904	CP026258.1	complement(15574156..15611141)	129.462	-1.25674	-2.38954	9.36577e-05	0.00237641	1	protein_coding	K03841//fructose-1,6-bisphosphatase I [EC:3.1.3.11]	XP_006796920.1//fructose-1,6-bisphosphatase 1b [Neolamprologus brichardi];XP_035464906.1//fructose-1,6-bisphosphatase 1-like [Scophthalmus maximus];AWP15595.1//Fructose-1-6-bisphosphatase 1b isoform 4 [Scophthalmus maximus];XP_019937543.1//PREDICTED: fructose-1,6-bisphosphatase 1-like [Paralichthys olivaceus]
SMAX5B_013940	CP026258.1	13909980..14002703	10.9012	-1.2593	-2.39379	0.00397179	0.0477786	1	protein_coding	K10955//mucin-2;K10104//ficolin;K06252//tenascin	XP_026153685.1//ficolin-2 isoform X1 [Mastacembelus armatus];XP_035236347.1//fibrinogen C domain-containing protein 1-like [Anguilla anguilla]
SMAX5B_011585	CP026250.1	complement(6385514..6393845)	44.1639	-1.26352	-2.4008	0.000246043	0.00520111	1	protein_coding	K07750//methylsterol monooxygenase [EC:1.14.18.9]	KAF0037229.1//hypothetical protein F2P81_010103 [Scophthalmus maximus]
SMAX5B_016637	CP026244.1	8106487..8156059	3.18907	-1.26462	-2.40264	0.000238192	0.00506718	1	protein_coding	K15191//La-related protein 7;K22614//NLR family CARD domain-containing protein 3	XP_018546219.1//PREDICTED: ADAMTS-like protein 1 isoform X1 [Lates calcarifer];AWO97697.1//putative ADAMTS-like protein 1 [Scophthalmus maximus];KAF0029370.1//hypothetical protein F2P81_018475 [Scophthalmus maximus]
SMAX5B_012277	CP026244.1	23750146..23770500	55.7077	-1.26464	-2.40266	1.67574e-05	0.000551576	0.317972	protein_coding	K19013//stabilin-2	AWO98390.1//putative stabilin-2-like [Scophthalmus maximus];XP_035472208.1//stabilin-2 [Scophthalmus maximus]
SMAX5B_001264	CP026249.1	20180570..20188139	84.5303	-1.26995	-2.41154	1.2791e-10	1.22216e-08	2.4271e-06	protein_coding	K19625//retinaldehyde-binding protein 1	AWP04711.1//putative alpha-tocopherol transfer protein [Scophthalmus maximus]
SMAX5B_011723	CP026243.1	23375054..23378267	58.9559	-1.27098	-2.41325	7.77484e-06	0.00028385	0.147528	protein_coding	K06563//C-type lectin domain family 4 member M;K17513//C-type lectin superfamily 17 member A	XP_035490518.1//CD209 antigen-like protein E [Scophthalmus maximus]
SMAX5B_003559	CP026258.1	complement(8329504..8337315)	115.975	-1.27162	-2.41432	2.71642e-07	1.43879e-05	0.00515441	protein_coding	K18592//gamma-glutamyltranspeptidase / glutathione hydrolase / leukotriene-C4 hydrolase [EC:2.3.2.2 3.4.19.13 3.4.19.14]	XP_022617924.1//glutathione hydrolase 1 proenzyme-like [Seriola dumerili]
SMAX5B_004235	CP026246.1	13033351..13036672	70.4213	-1.27237	-2.41558	1.49424e-07	8.46954e-06	0.00283532	protein_coding	K15117//solute carrier family 25, member 34/35	XP_035479978.1//solute carrier family 25 member 35 [Scophthalmus maximus]
SMAX5B_019321	CP026251.1	24202374..24209572	40.3201	-1.27548	-2.42079	0.000231347	0.00494674	1	protein_coding	K00799//glutathione S-transferase [EC:2.5.1.18]	AWP07696.1//Glutathione S-transferase theta 1b [Scophthalmus maximus]
SMAX5B_022438	CP026254.1	complement(10648276..10661806)	20.5841	-1.2757	-2.42117	6.03686e-05	0.00165208	1	protein_coding	K19475//WAS/WASL-interacting protein;K13171//serine/arginine repetitive matrix protein 1	KAF0042047.1//hypothetical protein F2P81_005579 [Scophthalmus maximus];AWP10856.1//Hypothetical protein SMAX5B_022438 [Scophthalmus maximus];XP_035503777.1//uncharacterized protein LOC118318343 isoform X1 [Scophthalmus maximus];AWP10855.1//Hypothetical protein SMAX5B_022438 [Scophthalmus maximus]
SMAX5B_007203	CP026260.1	21248852..21254334	19.9647	-1.27571	-2.42117	0.00255571	0.0340729	1	protein_coding	K11810//MFS transporter, MCT family, solute carrier family 16 (monocarboxylic acid transporters), member 12	XP_035468117.1//monocarboxylate transporter 12-B isoform X5 [Scophthalmus maximus];XP_035468119.1//monocarboxylate transporter 12-B isoform X7 [Scophthalmus maximus];XP_035468115.1//monocarboxylate transporter 12-B isoform X4 [Scophthalmus maximus]
SMAX5B_012206	CP026243.1	complement(16798968..16800732)	36.7396	-1.27844	-2.42576	1.87218e-05	0.000604339	0.355247	protein_coding	K04188//C-X-C chemokine receptor type 3	AWO96329.1//putative C-X-C chemokine receptor type 3-like [Scophthalmus maximus];XP_035485507.1//C-X-C chemokine receptor type 3-2 [Scophthalmus maximus]
SMAX5B_008750	CP026257.1	complement(13017496..13041443)	47.1938	-1.27927	-2.42715	0.00011016	0.0026969	1	protein_coding	K23293//regulator of microtubule dynamics protein 3	XP_035462201.1//regulator of microtubule dynamics protein 2 [Scophthalmus maximus];XP_023281453.1//regulator of microtubule dynamics protein 2-like [Seriola lalandi dorsalis]
SMAX5B_014843	CP026253.1	complement(10328460..10382961)	16.5715	-1.28033	-2.42894	0.000756742	0.0130988	1	protein_coding	K06762//contactin 4	XP_031700928.1//contactin-4-like isoform X2 [Anarrhichthys ocellatus];XP_034446768.1//contactin-4 isoform X1 [Hippoglossus hippoglossus]
SMAX5B_017596	CP026254.1	17869268..17886149	25.2558	-1.28547	-2.43762	4.11326e-07	2.0654e-05	0.0078049	protein_coding	K20174//oxysterol-binding protein-related protein 1/2	XP_019935988.1//PREDICTED: oxysterol-binding protein-related protein 1-like isoform X2 [Paralichthys olivaceus];AWP11247.1//putative oxysterol-binding protein-related protein 1-like [Scophthalmus maximus];XP_018525836.1//PREDICTED: oxysterol-binding protein-related protein 1-like isoform X4 [Lates calcarifer];XP_018525832.1//PREDICTED: oxysterol-binding protein-related protein 1-like isoform X1 […
SMAX5B_003214	CP026247.1	complement(24778696..24784138)	96.5053	-1.29086	-2.44673	1.36665e-09	1.10931e-07	2.59322e-05	protein_coding	K00213//7-dehydrocholesterol reductase [EC:1.3.1.21]	XP_031146564.1//7-dehydrocholesterol reductase [Sander lucioperca]
SMAX5B_008515	CP026257.1	11973404..12007018	29.4903	-1.29186	-2.44843	2.26156e-05	0.000717562	0.429131	protein_coding	K05093//fibroblast growth factor receptor 2 [EC:2.7.10.1]	AWP14297.1//Fibroblast growth factor receptor [Scophthalmus maximus];XP_035462522.1//fibroblast growth factor receptor 2 isoform X5 [Scophthalmus maximus];XP_035462519.1//fibroblast growth factor receptor 2 isoform X2 [Scophthalmus maximus];XP_035462517.1//fibroblast growth factor receptor 2 isoform X1 [Scophthalmus maximus];XP_035462520.1//fibroblast growth factor receptor 2 isoform X3 [Scophtha…
SMAX5B_022663	CP026254.1	complement(12157141..12206792)	15.2104	-1.29311	-2.45056	1.36609e-06	5.97969e-05	0.0259216	protein_coding	K23342//fibrillin 2/3	XP_035503625.1//LOW QUALITY PROTEIN: fibrillin-2b [Scophthalmus maximus];AWP10931.1//putative fibrillin-2-like [Scophthalmus maximus]
SMAX5B_013095	CP026247.1	19843599..19872710	40.9888	-1.29421	-2.45243	1.0643e-06	4.80977e-05	0.0201951	protein_coding	K22653//neuroplastin	XP_035483394.1//neuroplastin b isoform X2 [Scophthalmus maximus];XP_035483391.1//neuroplastin b isoform X1 [Scophthalmus maximus];XP_023130698.1//neuroplastin b isoform X3 [Amphiprion ocellaris]
SMAX5B_006963	CP026243.1	9719336..9729939	7.53725	-1.29828	-2.45935	0.000450427	0.00862851	1	protein_coding	K20066//SH3 domain-binding protein 4	XP_035006624.1//SH3 domain-binding protein 4-A [Hippoglossus stenolepis]
SMAX5B_021475	CP026261.1	2787070..2793727	47.8117	-1.30157	-2.46496	0.000479368	0.00903665	1	protein_coding	NA	KAF0032239.1//hypothetical protein F2P81_014529 [Scophthalmus maximus]
SMAX5B_012602	CP026247.1	complement(9593701..9595599)	16.6862	-1.30246	-2.46649	0.000346601	0.00696576	1	protein_coding	K04245//chemokine-like receptor 1	AWP01425.1//putative C3a anaphylatoxin chemotactic receptor-like [Scophthalmus maximus]
SMAX5B_005983	CP026249.1	16674442..16746521	2.91158	-1.30353	-2.46833	0.00459397	0.0531965	1	protein_coding	K20493//leucine-rich repeat-containing protein 16	AWP04583.1//putative leucine-rich repeat-containing protein 16B-like [Scophthalmus maximus];XP_030608249.1//capping protein, Arp2/3 and myosin-I linker protein 3 isoform X4 [Archocentrus centrarchus];XP_035491047.1//capping protein, Arp2/3 and myosin-I linker protein 3 isoform X2 [Scophthalmus maximus];AWP04584.1//putative leucine-rich repeat-containing protein 16B-like isoform 2 [Scophthalmus ma…
SMAX5B_011880	CP026243.1	complement(18724259..18737658)	92.7986	-1.30359	-2.46843	2.37726e-07	1.27814e-05	0.00451084	protein_coding	K12406//pyruvate kinase isozymes R/L [EC:2.7.1.40];K00497//steroid 11beta-monooxygenase [EC:1.14.15.4];K00873//pyruvate kinase [EC:2.7.1.40]	XP_022612265.1//cytochrome P450 11B, mitochondrial-like [Seriola dumerili];KAF1387993.1//hypothetical protein PFLUV_G00085660 [Perca fluviatilis]
SMAX5B_007910	CP026254.1	21182681..21188002	40.4116	-1.30386	-2.46889	0.000384752	0.00757767	1	protein_coding	K01466//allantoinase [EC:3.5.2.5]	AWP11445.1//putative allantoinase-like [Scophthalmus maximus]
SMAX5B_010332	CP026251.1	complement(21186027..21200983)	31.487	-1.30539	-2.47151	0.00136675	0.0210631	1	protein_coding	K23080//cytosolic arginine sensor for mTORC1 subunit 1	AWP07560.1//Hypothetical protein SMAX5B_010332 [Scophthalmus maximus];XP_034781204.1//cytosolic arginine sensor for mTORC1 subunit 1-like [Acipenser ruthenus];XP_035495580.1//cytosolic arginine sensor for mTORC1 subunit 1 isoform X2 [Scophthalmus maximus]
SMAX5B_005500	CP026244.1	complement(14306452..14336192)	40.341	-1.31	-2.47941	2.11251e-06	8.7869e-05	0.0400849	protein_coding	K10395//kinesin family member 4/21/27	AWO97957.1//putative kinesin-like protein KIF21A [Scophthalmus maximus];XP_035504199.1//kinesin-like protein KIF21A isoform X3 [Scophthalmus maximus];XP_035504188.1//kinesin-like protein KIF21A isoform X2 [Scophthalmus maximus]
SMAX5B_004321	CP026246.1	complement(13811382..13814265)	63.3192	-1.31354	-2.48551	9.50147e-06	0.000337312	0.18029	protein_coding	K00911//1D-myo-inositol-triphosphate 3-kinase [EC:2.7.1.127]	AWP00270.1//putative inositol-trisphosphate 3-kinase C-like [Scophthalmus maximus]
SMAX5B_007828	CP026244.1	19233827..19243114	7.98213	-1.31432	-2.48686	0.00499123	0.0562767	1	protein_coding	K12388//sortilin	AWO98118.1//putative sortilin-like [Scophthalmus maximus]
SMAX5B_019557	CP026253.1	23886766..23903376	8.52124	-1.31453	-2.48721	0.000648125	0.0115168	1	protein_coding	K10955//mucin-2;K05762//radixin;K05763//moesin;K06082//FERM, RhoGEF and pleckstrin domain protein 2	XP_023262025.1//FERM domain-containing protein 4B isoform X2 [Seriola lalandi dorsalis];XP_035501284.1//FERM domain-containing protein 4B-like isoform X2 [Scophthalmus maximus];XP_023262024.1//FERM domain-containing protein 4B isoform X1 [Seriola lalandi dorsalis];AWP10313.1//putative FERM domain-containing protein 4B-like [Scophthalmus maximus]
SMAX5B_007870	CP026254.1	complement(20977786..20996440)	75.9002	-1.31488	-2.48782	2.605e-06	0.000106499	0.0494299	protein_coding	K14345//solute carrier organic anion transporter family, member 2A	XP_035504123.1//solute carrier organic anion transporter family member 2A1 [Scophthalmus maximus]
SMAX5B_011751	CP026243.1	16805110..16809387	2.61973	-1.31781	-2.49287	0.00937355	0.0886009	1	protein_coding	K18808//toll-like receptor 13	AWO96331.1//Toll-like receptor 21 [Scophthalmus maximus]
SMAX5B_013539	CP026243.1	11582031..11595599	164.002	-1.31872	-2.49445	3.29433e-07	1.70014e-05	0.006251	protein_coding	K07906//Ras-related protein Rab-25	XP_035495734.1//ras-related protein Rab-25b isoform X2 [Scophthalmus maximus];XP_035495725.1//ras-related protein Rab-25b isoform X1 [Scophthalmus maximus]
SMAX5B_011967	CP026243.1	16177629..16179466	47.4527	-1.32154	-2.49934	0.0016281	0.0241203	1	protein_coding	K07925//Ras-related protein Rab-39B	XP_035504130.1//ras-related protein Rab-42b [Scophthalmus maximus]
SMAX5B_019132	CP026255.1	complement(18710115..18722927)	118.97	-1.32223	-2.50052	0.00169778	0.0248152	1	protein_coding	K01373//cathepsin F [EC:3.4.22.41];K15025//probable RNA-binding protein EIF1AD	AWP12467.1//Cathepsin F [Scophthalmus maximus];KAF0039667.1//hypothetical protein F2P81_007902 [Scophthalmus maximus];XP_035505110.1//cathepsin F [Scophthalmus maximus];XP_034740206.1//cathepsin F [Etheostoma cragini];XP_022074393.1//cathepsin L-like [Acanthochromis polyacanthus]
SMAX5B_013204	CP026247.1	17660393..17664266	30.2557	-1.32329	-2.50236	0.000263004	0.00547658	1	protein_coding	K22190//membrane-spanning 4-domains subfamily A member 3/4/8/12/15/18	XP_035485117.1//uncharacterized protein LOC118302785 [Scophthalmus maximus];AWP01790.1//Hypothetical protein SMAX5B_013204 [Scophthalmus maximus]
SMAX5B_006994	CP026245.1	complement(76520..89901)	15.8925	-1.32453	-2.50451	0.00495837	0.0560954	1	protein_coding	K07525//neuronal guanine nucleotide exchange factor	AWO98407.1//putative ephexin-1 [Scophthalmus maximus]
SMAX5B_020967	CP026261.1	complement(11390371..11414812)	10.7124	-1.32704	-2.50887	0.00118827	0.018869	1	protein_coding	K08049//adenylate cyclase 9 [EC:4.6.1.1]	XP_035471500.1//adenylate cyclase type 9-like isoform X1 [Scophthalmus maximus];AWP18935.1//putative adenylate cyclase type 9 [Scophthalmus maximus]
SMAX5B_004534	CP026245.1	complement(10421356..10460867)	6.55343	-1.32757	-2.50979	0.000457584	0.00873431	1	protein_coding	K22656//immunoglobulin superfamily member 9B	AWO98830.1//putative protein turtle -like B-like [Scophthalmus maximus];XP_035479272.1//protein turtle homolog B isoform X1 [Scophthalmus maximus];XP_035479274.1//protein turtle homolog B isoform X3 [Scophthalmus maximus];XP_035479273.1//protein turtle homolog B isoform X2 [Scophthalmus maximus]
SMAX5B_021210	CP026247.1	28767375..28774307	68.0683	-1.32768	-2.50998	0.00377691	0.0457985	1	protein_coding	K18543//choriolysin H [EC:3.4.24.67]	AWP02139.1//Metalloendopeptidase [Scophthalmus maximus]
SMAX5B_004274	CP026246.1	11473613..11477915	1022.44	-1.3325	-2.51839	0.000405775	0.00789868	1	protein_coding	K08203//MFS transporter, OCT family, solute carrier family 22 (organic anion transporter), member 6	XP_035480758.1//solute carrier family 22 member 6 [Scophthalmus maximus]
SMAX5B_001016	CP026253.1	24138743..24139360	47.6592	-1.33297	-2.51921	0.000762579	0.0131696	1	protein_coding	K20395//CO300B/D/F antigen	AWP10340.1//putative CMRF35-like molecule 3 [Scophthalmus maximus];XP_035501368.1//CMRF35-like molecule 7 [Scophthalmus maximus]
SMAX5B_002264	CP026248.1	complement(11551524..11578955)	14.8427	-1.33754	-2.5272	0.000159448	0.00368865	1	protein_coding	K07526//SLIT-ROBO Rho GTPase activating protein	XP_035486900.1//SLIT-ROBO Rho GTPase-activating protein 3-like isoform X2 [Scophthalmus maximus];XP_035486899.1//SLIT-ROBO Rho GTPase-activating protein 3-like isoform X1 [Scophthalmus maximus]
SMAX5B_010864	CP026251.1	7330915..7332594	1258.74	-1.3398	-2.53116	0.00182794	0.0264403	1	protein_coding	K04525//serpin A	XP_035495072.1//hibernation-specific plasma protein HP-55-like [Scophthalmus maximus]
SMAX5B_004506	CP026244.1	complement(790401..793272)	9.88576	-1.34355	-2.53776	0.000174748	0.00399174	1	protein_coding	K18808//toll-like receptor 13	AWO97257.1//putative toll-like receptor 13-like [Scophthalmus maximus]
SMAX5B_020388	CP026260.1	complement(6373991..6397736)	9.50085	-1.3457	-2.54154	3.16139e-05	0.000964627	0.599874	protein_coding	K14376//poly(A) polymerase [EC:2.7.7.19]	XP_035469098.1//ras-associating and dilute domain-containing protein-like isoform X5 [Scophthalmus maximus];AWP17250.1//putative ras-associating and dilute domain-containing protein-like [Scophthalmus maximus];XP_019938739.1//PREDICTED: ras-associating and dilute domain-containing protein-like [Paralichthys olivaceus]
SMAX5B_002527	CP026243.1	13568093..13577369	9.94156	-1.34577	-2.54165	0.0054681	0.0598332	1	protein_coding	NA	XP_035018999.1//uncharacterized protein LOC118113400 isoform X2 [Hippoglossus stenolepis];XP_035018998.1//uncharacterized protein LOC118113400 isoform X1 [Hippoglossus stenolepis]
SMAX5B_001914	CP026263.1	4785742..4793539	162.147	-1.34584	-2.54178	8.33254e-06	0.000302231	0.15811	protein_coding	K00451//homogentisate 1,2-dioxygenase [EC:1.13.11.5]	XP_035474766.1//homogentisate 1,2-dioxygenase [Scophthalmus maximus]
SMAX5B_011787	CP026243.1	complement(20643017..20646281)	9.37717	-1.34849	-2.54645	0.000733551	0.0127635	1	protein_coding	K23616//ataxin 1/1L	XP_023258911.1//ataxin-1-like [Seriola lalandi dorsalis];XP_003392429.1//hypothetical protein, unlikely [Leishmania infantum JPCM5];AWO96675.1//putative ataxin-1-like [Scophthalmus maximus]
SMAX5B_007278	CP026250.1	complement(17105343..17115571)	113.562	-1.35027	-2.54961	1.88018e-06	7.93902e-05	0.0356764	protein_coding	K13577//solute carrier family 25 (mitochondrial dicarboxylate transporter), member 10	AWP06030.1//Mitochondrial dicarboxylate carrier [Scophthalmus maximus]
SMAX5B_008621	CP026257.1	19084840..19107019	17.9991	-1.35359	-2.55548	3.32257e-05	0.00100283	0.630458	protein_coding	K06803//cadherin 11, type 2, OB-cadherin	XP_035462118.1//cadherin-11 [Scophthalmus maximus]
SMAX5B_004835	CP026246.1	complement(19131511..19147758)	150.361	-1.35433	-2.55679	6.43846e-05	0.00173083	1	protein_coding	K05849//solute carrier family 8 (sodium/calcium exchanger)	AWP00533.1//putative sodium/calcium exchanger 2-like [Scophthalmus maximus];XP_035482862.1//sodium/calcium exchanger 2-like isoform X2 [Scophthalmus maximus]
SMAX5B_016558	CP026251.1	13787043..13833988	14.4274	-1.35834	-2.56389	1.26588e-05	0.000429581	0.240201	protein_coding	K08654//proprotein convertase subtilisin/kexin type 5 [EC:3.4.21.-]	AWP07185.1//putative proprotein convertase subtilisin/kexin type 5 [Scophthalmus maximus];KAF0033910.1//hypothetical protein F2P81_013976 [Scophthalmus maximus];XP_029295186.1//proprotein convertase subtilisin/kexin type 5 isoform X2 [Cottoperca gobio];XP_034397155.1//LOW QUALITY PROTEIN: proprotein convertase subtilisin/kexin type 5b [Cyclopterus lumpus];XP_029295185.1//proprotein convertase sub…
SMAX5B_013855	CP026258.1	complement(13704493..13801728)	6.68031	-1.36008	-2.56699	0.000227827	0.00490283	1	protein_coding	K06247//laminin, gamma 3	AWP15535.1//putative laminin subunit gamma-3-like [Scophthalmus maximus]
SMAX5B_010544	CP026244.1	3287656..3290710	54.6788	-1.36275	-2.57175	5.73787e-06	0.000217558	0.108876	protein_coding	K11206//deaminated glutathione amidase [EC:3.5.1.128]	AWO97441.1//putative nitrilase -like 1 [Scophthalmus maximus];XP_035463938.1//LOW QUALITY PROTEIN: deaminated glutathione amidase [Scophthalmus maximus]
SMAX5B_000120	CP026262.1	complement(18546343..18552507)	57.4923	-1.36341	-2.57292	7.42622e-06	0.000274115	0.140913	protein_coding	NA	AWP20418.1//Hypothetical protein SMAX5B_000120 [Scophthalmus maximus];XP_035473807.1//uncharacterized protein LOC118290322 [Scophthalmus maximus]
SMAX5B_007930	CP026254.1	21188970..21192460	341.857	-1.366	-2.57755	1.47349e-05	0.000490802	0.279595	protein_coding	K00830//alanine-glyoxylate transaminase / serine-glyoxylate transaminase / serine-pyruvate transaminase [EC:2.6.1.44 2.6.1.45 2.6.1.51]	KAF0042576.1//hypothetical protein F2P81_006108 [Scophthalmus maximus]
SMAX5B_020028	CP026246.1	20243129..20313013	9.19843	-1.36646	-2.57838	0.000256487	0.00538453	1	protein_coding	K13762//cGMP-specific 3',5'-cyclic phosphodiesterase [EC:3.1.4.35]	XP_026186710.1//cGMP-specific 3',5'-cyclic phosphodiesterase isoform X1 [Mastacembelus armatus];XP_018529834.1//PREDICTED: cGMP-specific 3',5'-cyclic phosphodiesterase isoform X2 [Lates calcarifer]
SMAX5B_014784	CP026253.1	complement(16321223..16339732)	83.2128	-1.36821	-2.58151	7.4851e-07	3.47662e-05	0.014203	protein_coding	K05039//solute carrier family 6 (neurotransmitter transporter, taurine) member 6	AWP09852.1//Transporter [Scophthalmus maximus];XP_035502057.1//sodium- and chloride-dependent taurine transporter-like [Scophthalmus maximus]
SMAX5B_008400	CP026245.1	3082931..3112133	126.866	-1.36844	-2.58191	0.00818479	0.0808746	1	protein_coding	K23593//alpha-2-macroglobulin-like protein	XP_034459867.1//alpha-2-macroglobulin isoform X1 [Hippoglossus hippoglossus];AWO98489.1//putative alpha-2-macroglobulin-like [Scophthalmus maximus];AWO98491.1//putative alpha-2-macroglobulin-like isoform 3 [Scophthalmus maximus]
SMAX5B_008314	CP026262.1	4186847..4188511	19.4696	-1.36853	-2.58207	0.000183003	0.00411842	1	protein_coding	K03907//thrombomodulin	AWP19672.1//putative thrombomodulin-like [Scophthalmus maximus]
SMAX5B_018280	CP026256.1	complement(5455125..5467563)	11.0546	-1.37181	-2.58796	0.000321845	0.00654693	1	protein_coding	K15261//poly [ADP-ribose] polymerase 10/14/15 [EC:2.4.2.30];K17598//synaptotagmin-like protein;K19513//protein CLEC16A	AWP12805.1//putative extended synaptotagmin-3-like [Scophthalmus maximus]
SMAX5B_010928	CP026251.1	7008565..7012345	23.9001	-1.3724	-2.589	0.0011684	0.0186298	1	protein_coding	K10955//mucin-2;K11661//helicase SRCAP [EC:3.6.4.-]	XP_035495865.1//vestigial like 4 like [Scophthalmus maximus]
SMAX5B_008267	CP026262.1	complement(9063802..9066887)	6.66639	-1.37426	-2.59235	0.00524889	0.0582007	1	protein_coding	K23033//terminal nucleotidyltransferase 5A/B [EC:2.7.7.-]	AWP19873.1//DUF1693 domain containing protein [Scophthalmus maximus]
SMAX5B_001540	CP026263.1	complement(9796293..9803693)	5.07704	-1.37692	-2.59714	0.00211273	0.0296012	1	protein_coding	K23573//dentin sialophosphoprotein;K19607//X-linked retinitis pigmentosa GTPase regulator	AWP20950.1//putative junctional protein associated with coronary artery disease [Scophthalmus maximus]
SMAX5B_020405	CP026260.1	complement(10092417..10108517)	13.7291	-1.37846	-2.5999	0.000107076	0.00264074	1	protein_coding	K01283//peptidyl-dipeptidase A [EC:3.4.15.1]	AWP17473.1//Angiotensin-converting enzyme [Scophthalmus maximus]
SMAX5B_004227	CP026246.1	16766719..16771140	105.123	-1.37858	-2.60012	0.000136331	0.00323347	1	protein_coding	K00457//4-hydroxyphenylpyruvate dioxygenase [EC:1.13.11.27]	XP_035480926.1//4-hydroxyphenylpyruvate dioxygenase isoform X1 [Scophthalmus maximus];AWP00427.1//4-hydroxyphenylpyruvate dioxygenase [Scophthalmus maximus]
SMAX5B_002004	CP026263.1	8086610..8092154	219.932	-1.3817	-2.60576	4.88383e-05	0.00137479	0.926707	protein_coding	K08010//neutrophil cytosolic factor 2	AWP20894.1//putative neutrophil cytosol factor 2 [Scophthalmus maximus];XP_035474476.1//neutrophil cytosol factor 2 [Scophthalmus maximus]
SMAX5B_014485	CP026253.1	12364754..12393995	6.14263	-1.38196	-2.60623	0.0037625	0.0457587	1	protein_coding	K08046//adenylate cyclase 6 [EC:4.6.1.1]	AWP09641.1//putative adenylate cyclase type 6-like [Scophthalmus maximus];XP_013874863.1//PREDICTED: adenylate cyclase type 6-like isoform X2 [Austrofundulus limnaeus]
SMAX5B_009029	CP026259.1	complement(3783790..3792194)	360.657	-1.38609	-2.61369	0.000677638	0.0119397	1	protein_coding	K00688//glycogen phosphorylase [EC:2.4.1.1]	XP_019953732.1//PREDICTED: glycogen phosphorylase, liver form [Paralichthys olivaceus]
SMAX5B_018772	CP026251.1	3777359..3784730	9.58114	-1.38921	-2.61936	0.00158371	0.0236228	1	protein_coding	K16519//A-kinase anchor protein 2;K23819	AWP06601.1//Hypothetical protein SMAX5B_018772 [Scophthalmus maximus]
SMAX5B_016717	CP026244.1	complement(19835065..19836512)	14.2934	-1.38939	-2.61968	0.00819601	0.0808746	1	protein_coding	K09440//transcription factor Spi-C	AWO98155.1//putative transcription factor PU.1-like [Scophthalmus maximus]
SMAX5B_010381	CP026251.1	17782344..17788237	41.0164	-1.3938	-2.62769	8.94931e-06	0.000319747	0.169813	protein_coding	K00456//cysteine dioxygenase [EC:1.13.11.20]	AWP07362.1//putative cysteine dioxygenase type 1 [Scophthalmus maximus]
SMAX5B_006257	CP026249.1	complement(6316224..6325022)	6.03132	-1.40216	-2.64297	0.00777735	0.0779647	1	protein_coding	K04193//XC chemokine receptor 1	XP_035490794.1//chemokine XC receptor 1-like [Scophthalmus maximus];AWP03871.1//putative chemokine XC receptor 1-like [Scophthalmus maximus]
SMAX5B_006583	CP026249.1	8304764..8308936	142.599	-1.40672	-2.65133	2.47352e-05	0.000771637	0.46935	protein_coding	K00814//alanine transaminase [EC:2.6.1.2]	XP_035489612.1//alanine aminotransferase 1-like [Scophthalmus maximus];AWP03991.1//putative alanine aminotransferase 2-like [Scophthalmus maximus]
SMAX5B_008540	CP026257.1	12184744..12325370	1.86314	-1.40718	-2.65218	0.00064125	0.0114068	1	protein_coding	K06813//cadherin 23	XP_035519297.1//cadherin-23 isoform X1 [Morone saxatilis];XP_023267596.1//cadherin-23 [Seriola lalandi dorsalis];XP_035519298.1//cadherin-23 isoform X2 [Morone saxatilis]
SMAX5B_009895	CP026252.1	complement(15019804..15132402)	2.40044	-1.40816	-2.65398	0.00188435	0.0270922	1	protein_coding	K15009//SH3 and multiple ankyrin repeat domains protein	AWP08593.1//putative SH3 and multiple ankyrin repeat domains protein 3-like [Scophthalmus maximus];XP_035498363.1//LOW QUALITY PROTEIN: SH3 and multiple ankyrin repeat domains protein 3 [Scophthalmus maximus];XP_018519337.1//PREDICTED: SH3 and multiple ankyrin repeat domains protein 3-like isoform X3 [Lates calcarifer];KAF0041211.1//hypothetical protein F2P81_007109 [Scophthalmus maximus];XP_0185…
SMAX5B_017133	CP026260.1	1126814..1135899	16.3671	-1.41546	-2.66744	0.00190748	0.0273919	1	protein_coding	NA	AWP17054.1//putative PX domain-containing protein 1-like [Scophthalmus maximus]
SMAX5B_000760	CP026245.1	21019866..21021815	135.752	-1.41933	-2.67462	3.24331e-08	2.09388e-06	0.000615419	protein_coding	K08130//tsukushi (leucine-rich repeat-containing protein 54)	AWO99376.1//putative tsukushin [Scophthalmus maximus]
SMAX5B_001317	CP026252.1	3743809..3756649	15.0469	-1.42248	-2.68046	4.38664e-05	0.00126143	0.832365	protein_coding	K19987//exocyst complex component 3-like protein	XP_022624283.1//exocyst complex component 3-like protein [Seriola dumerili];XP_035013683.1//exocyst complex component 3-like protein isoform X3 [Hippoglossus stenolepis];AWP07934.1//putative exocyst complex component 3-like protein [Scophthalmus maximus]
SMAX5B_011303	CP026250.1	complement(9477132..9479954)	51.4945	-1.42381	-2.68293	2.51041e-08	1.65916e-06	0.000476351	protein_coding	K19977//ADP-ribosyltransferase 5 [EC:2.4.2.31]	XP_035492214.1//GPI-linked NAD(P)(+)--arginine ADP-ribosyltransferase 1 [Scophthalmus maximus]
SMAX5B_012618	CP026247.1	complement(8060355..8064852)	68.0296	-1.42898	-2.69256	1.35696e-06	5.95533e-05	0.0257484	protein_coding	K06853//hyaluronan and proteoglycan link protein 4;K10477//BTB/POZ domain-containing protein 1/2	AWP01337.1//putative transmembrane 6 superfamily member 1 isoform 3 [Scophthalmus maximus];AWP01336.1//putative transmembrane 6 superfamily member 1 isoform 2 [Scophthalmus maximus];AWP01335.1//putative transmembrane 6 superfamily member 1 [Scophthalmus maximus]
SMAX5B_018875	CP026246.1	1021279..1026705	165.396	-1.42947	-2.69348	0.000484774	0.00910913	1	protein_coding	K03983//alpha-2-antiplasmin	XP_035480373.1//alpha-2-antiplasmin isoform X1 [Scophthalmus maximus]
SMAX5B_004732	CP026247.1	546684..555729	46.7031	-1.43149	-2.69725	1.67785e-06	7.13874e-05	0.0318371	protein_coding	K17092//annexin A2	XP_035483651.1//annexin A2-A-like isoform X1 [Scophthalmus maximus]
SMAX5B_010484	CP026251.1	complement(17192188..17196598)	15.9697	-1.43454	-2.70297	0.000170992	0.00392202	1	protein_coding	K15281//solute carrier family 35	XP_028434408.1//UDP-N-acetylglucosamine/UDP-glucose/GDP-mannose transporter-like isoform X1 [Perca flavescens];KAF0034025.1//hypothetical protein F2P81_014091 [Scophthalmus maximus]
SMAX5B_000798	CP026249.1	complement(19396965..19423067)	28.8554	-1.43462	-2.7031	1.13226e-07	6.5967e-06	0.00214846	protein_coding	K00207//dihydropyrimidine dehydrogenase (NADP+) [EC:1.3.1.2]	XP_023146632.1//dihydropyrimidine dehydrogenase [NADP(+)] [Amphiprion ocellaris];XP_035490670.1//protein odr-4 homolog [Scophthalmus maximus]
SMAX5B_020477	CP026254.1	3591547..3599327	255.154	-1.43564	-2.70501	0.00396756	0.0477621	1	protein_coding	K04004//complement factor H	AWP10563.1//putative complement factor H-like isoform 2 [Scophthalmus maximus];AWP10562.1//putative complement factor H-like [Scophthalmus maximus];AWP10565.1//putative complement factor H-like isoform 4 [Scophthalmus maximus];AWP10564.1//putative complement factor H-like isoform 3 [Scophthalmus maximus]
SMAX5B_013869	CP026258.1	complement(13503617..13506007)	6.05203	-1.43891	-2.71116	0.00277386	0.0362924	1	protein_coding	K16513//carboxyl-terminal PDZ ligand of neuronal nitric oxide synthase protein	AWP15521.1//putative carboxyl-terminal PDZ ligand of neuronal nitric oxide synthase protein-like [Scophthalmus maximus]
SMAX5B_020646	CP026260.1	18191488..18193307	21.1874	-1.43936	-2.71201	0.00267701	0.0352455	1	protein_coding	K08052//neurofibromin 1;K15717//prostamide/prostaglandin F2alpha synthase [EC:1.11.1.20]	AWP18027.1//AhpC-TSA 2 domain containing protein [Scophthalmus maximus];XP_035469333.1//peroxiredoxin-like 2A isoform X1 [Scophthalmus maximus]
SMAX5B_015658	CP026264.1	6210258..6212645	17.2044	-1.44338	-2.71958	0.00104679	0.0169935	1	protein_coding	NA	AWP21531.1//putative E3 ubiquitin-protein ligase bre1-like [Scophthalmus maximus]
SMAX5B_006696	CP026249.1	complement(13324208..13330739)	141.489	-1.44363	-2.72004	1.52692e-07	8.56767e-06	0.00289733	protein_coding	K08767//angiopoietin-like 4	XP_035490470.1//angiopoietin-related protein 4 [Scophthalmus maximus]
SMAX5B_010481	CP026251.1	complement(17181051..17184400)	9.18626	-1.44501	-2.72264	0.00834749	0.0819287	1	protein_coding	K19019//intracellular hyaluronan-binding protein 4	AWP07324.1//putative intracellular hyaluronan-binding protein 4-like [Scophthalmus maximus]
SMAX5B_001876	CP026250.1	complement(18959042..18964901)	74.3238	-1.44956	-2.73124	4.51227e-11	4.68632e-09	8.56204e-07	protein_coding	K16738//nuclear distribution protein NudE	XP_035493487.1//nuclear distribution protein nudE homolog 1-A-like [Scophthalmus maximus]
SMAX5B_020733	CP026261.1	8453395..8461645	43.3067	-1.45279	-2.73737	8.94714e-11	9.06698e-09	1.69772e-06	protein_coding	K06471//platelet/endothelial cell adhesion molecule	AWP18709.1//putative platelet endothelial cell adhesion molecule-like [Scophthalmus maximus];AWP18710.1//putative platelet endothelial cell adhesion molecule-like isoform 2 [Scophthalmus maximus];AWP18711.1//putative platelet endothelial cell adhesion molecule-like isoform 3 [Scophthalmus maximus]
SMAX5B_012026	CP026243.1	15980854..15983976	25.3515	-1.45478	-2.74115	5.9109e-05	0.00162559	1	protein_coding	K15135//mediator of RNA polymerase II transcription subunit 18	XP_033878436.1//mediator of RNA polymerase II transcription subunit 18 [Acipenser ruthenus];XP_035479904.1//uncharacterized protein LOC118299961 isoform X1 [Scophthalmus maximus];AWO96279.1//Hypothetical protein SMAX5B_012026 [Scophthalmus maximus]
SMAX5B_018544	CP026256.1	complement(16420135..16421093)	24.4437	-1.4555	-2.74252	0.00870739	0.0840625	1	protein_coding	NA	KAF0026656.1//hypothetical protein F2P81_021393 [Scophthalmus maximus];XP_035460719.1//p53-induced death domain-containing protein 1 [Scophthalmus maximus]
SMAX5B_013176	CP026247.1	complement(22363601..22367292)	319.127	-1.45968	-2.75047	0.000130588	0.00313279	1	protein_coding	K07408//cytochrome P450 family 1 subfamily A polypeptide 1 [EC:1.14.14.1]	ADC35580.1//CYP1A [Lateolabrax japonicus]
SMAX5B_018494	CP026256.1	complement(11673328..11684241)	35.3079	-1.46053	-2.7521	0.000178847	0.00406689	1	protein_coding	K23696	XP_022596751.1//growth factor receptor-bound protein 14 isoform X1 [Seriola dumerili];XP_035459889.1//cordon-bleu protein-like 1b isoform X3 [Scophthalmus maximus];XP_035459890.1//cordon-bleu protein-like 1b isoform X4 [Scophthalmus maximus];XP_035460058.1//LOW QUALITY PROTEIN: growth factor receptor-bound protein 14 [Scophthalmus maximus]
SMAX5B_001019	CP026253.1	24139884..24140288	45.9787	-1.46076	-2.75254	0.00267638	0.0352455	1	protein_coding	#N/A	#N/A
SMAX5B_020633	CP026260.1	complement(20246880..20270265)	7.16566	-1.46169	-2.75431	0.0082136	0.0808746	1	protein_coding	K04433//mitogen-activated protein kinase kinase 6 [EC:2.7.12.2]	XP_011789320.1//PREDICTED: dual specificity mitogen-activated protein kinase kinase 6 [Colobus angolensis palliatus];KAF4072754.1//hypothetical protein AMELA_G00251300 [Ameiurus melas];AWP18151.1//hypothetical protein SMAX5B_020633 [Scophthalmus maximus]
SMAX5B_011249	CP026248.1	complement(25878689..25894367)	3.95567	-1.47461	-2.77908	0.00427064	0.0504679	1	protein_coding	K06244//laminin, beta 3	AWP03505.1//putative laminin subunit beta-3 [Scophthalmus maximus];XP_035488402.1//laminin subunit beta-3-like [Scophthalmus maximus]
SMAX5B_015885	CP026264.1	2967703..2970178	80.3569	-1.47576	-2.78131	7.86695e-07	3.64386e-05	0.0149275	protein_coding	K14620//riboflavin transporter 2	XP_035477203.1//riboflavin transporter 2 [Scophthalmus maximus]
SMAX5B_001485	CP026244.1	complement(6022330..6037243)	5.1423	-1.47585	-2.78147	0.00427207	0.0504679	1	protein_coding	K09631//hepatocyte growth factor activator [EC:3.4.21.-]	AWO97627.1//putative hepatocyte growth factor activator [Scophthalmus maximus]
SMAX5B_017311	CP026260.1	complement(13800883..13804844)	5.2902	-1.47805	-2.78572	0.00968753	0.0905451	1	protein_coding	K16821//FERM domain-containing protein 1	XP_035468718.1//FERM domain-containing protein 6-like isoform X1 [Scophthalmus maximus]
SMAX5B_019081	CP026255.1	complement(15185662..15220163)	23.9913	-1.4823	-2.79394	1.52155e-07	8.56627e-06	0.00288714	protein_coding	K05097//FMS-like tyrosine kinase 4 [EC:2.7.10.1]	AWP12286.1//putative vascular endothelial growth factor receptor 3 [Scophthalmus maximus]
SMAX5B_011986	CP026243.1	complement(18837134..18861226)	23.2209	-1.48577	-2.80066	7.09788e-08	4.33152e-06	0.00134682	protein_coding	K23369//ADAMTS-like protein 4	AWO96535.1//putative ADAMTS-like protein 4-like [Scophthalmus maximus]
SMAX5B_009820	CP026252.1	10564583..10573027	166.401	-1.49527	-2.81917	1.02238e-06	4.65809e-05	0.0193996	protein_coding	K08746//solute carrier family 27 (fatty acid transporter), member 2 [EC:6.2.1.- 6.2.1.3]	XP_023266877.1//very long-chain acyl-CoA synthetase-like [Seriola lalandi dorsalis]
SMAX5B_013549	CP026243.1	complement(11720255..11725682)	63.462	-1.49737	-2.82327	6.0861e-05	0.00165471	1	protein_coding	K17515//C-type lectin domain family 9 member A;K17513//C-type lectin superfamily 17 member A	XP_035485742.1//C-type lectin domain family 4 member A-like isoform X2 [Scophthalmus maximus]
SMAX5B_008905	CP026255.1	13889154..13892731	10.5806	-1.50051	-2.82943	0.00477661	0.0545558	1	protein_coding	K23500//sideroflexin-1/3	XP_029967675.1//sideroflexin-1 [Salarias fasciatus]
SMAX5B_007055	CP026244.1	1645229..1651687	15.8882	-1.5049	-2.83804	0.000134079	0.0031982	1	protein_coding	K17477//FERM, RhoGEF and pleckstrin domain-containing protein 1	AWO97344.1//putative FERM domain-containing protein 7 [Scophthalmus maximus];XP_012873565.1//PREDICTED: FERM domain-containing protein 7 isoform X1 [Dipodomys ordii]
SMAX5B_004299	CP026246.1	14774295..14853323	1.99511	-1.50777	-2.84369	0.00265337	0.0351382	1	protein_coding	K06753//roundabout, axon guidance receptor 1	XP_035482366.1//LOW QUALITY PROTEIN: roundabout homolog 1-like [Scophthalmus maximus];AWP00319.1//putative roundabout -like 1-like isoform 2 [Scophthalmus maximus];AWP00318.1//putative roundabout -like 1-like [Scophthalmus maximus]
SMAX5B_001668	CP026250.1	complement(20945100..20957728)	26.9332	-1.51149	-2.85104	2.16839e-05	0.00068931	0.411453	protein_coding	K06471//platelet/endothelial cell adhesion molecule	AWP06293.1//putative platelet endothelial cell adhesion molecule-like isoform 2 [Scophthalmus maximus];XP_035493461.1//platelet endothelial cell adhesion molecule isoform X2 [Scophthalmus maximus];AWP06294.1//putative platelet endothelial cell adhesion molecule-like isoform 3 [Scophthalmus maximus];XP_035493464.1//platelet endothelial cell adhesion molecule isoform X5 [Scophthalmus maximus]
SMAX5B_014460	CP026253.1	11440092..11445566	188.862	-1.51322	-2.85446	1.43289e-05	0.000480147	0.271891	protein_coding	K01672//carbonic anhydrase [EC:4.2.1.1]	XP_018521658.1//PREDICTED: carbonic anhydrase 6 [Lates calcarifer];AWP09543.1//putative carbonic anhydrase 6 [Scophthalmus maximus];XP_035500097.1//uncharacterized protein ca6 [Scophthalmus maximus]
SMAX5B_001212	CP026263.1	14250575..14251943	12.5395	-1.51331	-2.85465	0.000824463	0.0140507	1	protein_coding	K15705//E3 ubiquitin-protein ligase RNF152 [EC:2.3.2.27]	XP_035474935.1//E3 ubiquitin-protein ligase rnf152 [Scophthalmus maximus]
SMAX5B_000614	CP026245.1	22471454..22488989	7.21456	-1.5134	-2.85482	0.00813472	0.0807244	1	protein_coding	K06786//junctional adhesion molecule 4	XP_035009365.1//immunoglobulin superfamily member 5 isoform X1 [Hippoglossus stenolepis];AWO99436.1//putative immunoglobulin superfamily member 5-like [Scophthalmus maximus]
SMAX5B_018906	CP026243.1	4119253..4126238	54.433	-1.51484	-2.85766	6.42463e-10	5.48093e-08	1.21907e-05	protein_coding	K22190//membrane-spanning 4-domains subfamily A member 3/4/8/12/15/18	XP_035485241.1//uncharacterized protein LOC118302857 [Scophthalmus maximus]
SMAX5B_019770	CP026250.1	complement(21238464..21242103)	8.12873	-1.51531	-2.8586	0.00635614	0.067139	1	protein_coding	K18669//dual specificity tyrosine-phosphorylation-regulated kinase 2/3/4 [EC:2.7.12.1]	AWP06301.1//putative dual specificity tyrosine-phosphorylation-regulated kinase 4-like [Scophthalmus maximus]
SMAX5B_021222	CP026247.1	28754276..28759550	3292.67	-1.52017	-2.86825	0.000837156	0.0141968	1	protein_coding	K18543//choriolysin H [EC:3.4.24.67]	AWP02136.1//putative high choriolytic enzyme 1-like isoform 8 [Scophthalmus maximus];AWP02132.1//putative high choriolytic enzyme 1-like isoform 4 [Scophthalmus maximus];AWP02130.1//putative high choriolytic enzyme 1-like isoform 2 [Scophthalmus maximus];AWP02134.1//putative high choriolytic enzyme 1-like isoform 6 [Scophthalmus maximus];AWP02131.1//putative high choriolytic enzyme 1-like isoform…
SMAX5B_007771	CP026244.1	18510384..18519526	22.201	-1.52195	-2.87179	1.372e-06	5.98989e-05	0.0260338	protein_coding	K17199//Ras and EF-hand domain-containing protein	XP_035460195.1//ras and EF-hand domain-containing protein homolog isoform X3 [Scophthalmus maximus];AWO98093.1//putative ras and EF-hand domain-containing protein-like [Scophthalmus maximus]
SMAX5B_017637	CP026254.1	complement(18852322..18861331)	51.7349	-1.52858	-2.88501	8.58918e-08	5.12927e-06	0.0016298	protein_coding	K07418//cytochrome P450 family 2 subfamily J [EC:1.14.14.1 1.14.14.73 1.14.14.74 1.14.14.75];K17852//cytochrome P450 family 2 subfamily AA/AD;K17856//cytochrome P450 family 2 subfamily N	XP_035503549.1//cytochrome P450 2J2-like isoform X1 [Scophthalmus maximus];XP_035503546.1//cytochrome P450 2J2-like [Scophthalmus maximus];AWP11326.1//putative cytochrome P450 2J2-like [Scophthalmus maximus]
SMAX5B_019663	CP026262.1	complement(12976637..13035247)	5.42594	-1.53173	-2.89132	1.98597e-05	0.000637377	0.376837	protein_coding	K19949//otoferlin	XP_035473398.1//otoferlin isoform X1 [Scophthalmus maximus];AWP20109.1//putative otoferlin-like [Scophthalmus maximus];XP_035473399.1//otoferlin isoform X2 [Scophthalmus maximus]
SMAX5B_004550	CP026245.1	complement(10391617..10407670)	13.7343	-1.53417	-2.89623	7.83137e-08	4.72738e-06	0.001486	protein_coding	K20647//Rho GTPase-activating protein 32	XP_035478883.1//rho GTPase-activating protein 32 isoform X1 [Scophthalmus maximus];AWO98829.1//putative rho GTPase-activating protein 32-like [Scophthalmus maximus]
SMAX5B_001251	CP026252.1	4125636..4129546	38.7538	-1.53795	-2.90381	3.05878e-07	1.59686e-05	0.00580404	protein_coding	K07127//5-hydroxyisourate hydrolase [EC:3.5.2.17]	AWP07965.1//putative 5-hydroxyisourate hydrolase-like isoform 3 [Scophthalmus maximus];XP_035497864.1//5-hydroxyisourate hydrolase b isoform X1 [Scophthalmus maximus]
SMAX5B_016967	CP026246.1	complement(24338534..24359432)	9.13616	-1.54583	-2.91972	0.00441986	0.0517292	1	protein_coding	K00315//dimethylglycine dehydrogenase [EC:1.5.8.4]	XP_035481999.1//dimethylglycine dehydrogenase, mitochondrial [Scophthalmus maximus]
SMAX5B_004172	CP026246.1	13087758..13093874	5.71329	-1.55112	-2.93045	0.00828405	0.0814331	1	protein_coding	K10251//17beta-estradiol 17-dehydrogenase / very-long-chain 3-oxoacyl-CoA reductase [EC:1.1.1.62 1.1.1.330]	XP_035480783.1//very-long-chain 3-oxoacyl-CoA reductase-B [Scophthalmus maximus]
SMAX5B_005495	CP026244.1	13253944..13256851	96.4463	-1.55133	-2.93088	4.67666e-07	2.29996e-05	0.00887397	protein_coding	K00251//3-oxo-5-beta-steroid 4-dehydrogenase [EC:1.3.1.3]	XP_035003344.1//aldo-keto reductase family 1 member D1-like [Hippoglossus stenolepis];XP_035470042.1//aldo-keto reductase family 1 member D1-like [Scophthalmus maximus]
SMAX5B_004967	CP026250.1	23668591..23674537	123.372	-1.5532	-2.93467	1.63147e-09	1.29288e-07	3.09572e-05	protein_coding	K10060//C-type lectin domain family 4 member F	XP_035492935.1//CD209 antigen-like [Scophthalmus maximus]
SMAX5B_016971	CP026246.1	22992284..23012838	25.9329	-1.5588	-2.94608	4.54493e-07	2.24839e-05	0.008624	protein_coding	K13885//scavenger receptor class B, member 1	XP_035481197.1//scavenger receptor class B member 1 isoform X2 [Scophthalmus maximus];XP_034458705.1//scavenger receptor class B member 1 isoform X1 [Hippoglossus hippoglossus];XP_019938115.1//PREDICTED: scavenger receptor class B member 1 isoform X4 [Paralichthys olivaceus];XP_018549919.1//PREDICTED: scavenger receptor class B member 1 isoform X1 [Lates calcarifer];XP_035481202.1//scavenger rece…
SMAX5B_003931	CP026243.1	1462657..1470736	19.4384	-1.55934	-2.94719	2.94914e-06	0.000118255	0.0559599	protein_coding	K18623//protein cordon-bleu	AWO95582.1//putative cordon-bleu protein-like 1 [Scophthalmus maximus];XP_035483653.1//cordon-bleu protein-like 1 isoform X3 [Scophthalmus maximus];XP_035483677.1//cordon-bleu protein-like 1 isoform X5 [Scophthalmus maximus]
SMAX5B_012682	CP026247.1	16152986..16163398	38.3461	-1.55965	-2.94783	3.02077e-10	2.74512e-08	5.73191e-06	protein_coding	K00844//hexokinase [EC:2.7.1.1]	AWP01716.1//putative hexokinase HKDC1 [Scophthalmus maximus]
SMAX5B_009617	CP026264.1	complement(11086257..11093694)	80.0972	-1.56317	-2.95502	6.21314e-14	1.09358e-11	1.17894e-09	protein_coding	K00898//pyruvate dehydrogenase kinase 2/3/4 [EC:2.7.11.2]	XP_018522698.1//PREDICTED: pyruvate dehydrogenase kinase, isozyme 4 isoform X2 [Lates calcarifer];XP_035476258.1//pyruvate dehydrogenase kinase, isozyme 4 [Scophthalmus maximus];KAF0024709.1//hypothetical protein F2P81_023511 [Scophthalmus maximus];XP_018522693.1//PREDICTED: pyruvate dehydrogenase kinase, isozyme 4 isoform X1 [Lates calcarifer]
SMAX5B_003539	CP026258.1	9180972..9183369	17.9837	-1.56477	-2.9583	0.00579783	0.0624247	1	protein_coding	K17303//melanoma antigen recognized by T-cells 1	XP_035463325.1//LOW QUALITY PROTEIN: melanoma antigen recognized by T-cells 1 [Scophthalmus maximus]
SMAX5B_017802	CP026252.1	20887472..20892538	31.1848	-1.56618	-2.9612	9.96339e-05	0.00249398	1	protein_coding	K17858//cytochrome P450 family 2 subfamily X	AWP08864.1//putative cytochrome P450 2F2-like [Scophthalmus maximus];AWP08863.1//putative cytochrome P450 2F2 [Scophthalmus maximus]
SMAX5B_001400	CP026261.1	complement(1419236..1420976)	6.1102	-1.57039	-2.96985	0.00744427	0.0754398	1	protein_coding	K16938//septin 3/9/12	AWP18313.1//Hypothetical protein SMAX5B_001400 [Scophthalmus maximus]
SMAX5B_002395	CP026248.1	13850067..13861261	36.4055	-1.57207	-2.9733	2.88768e-12	3.60335e-10	5.47937e-08	protein_coding	K19030//6-phosphofructo-2-kinase / fructose-2,6-biphosphatase 4 [EC:2.7.1.105 3.1.3.46]	XP_022601269.1//6-phosphofructo-2-kinase/fructose-2,6-bisphosphatase 4-like isoform X3 [Seriola dumerili];XP_034440522.1//6-phosphofructo-2-kinase/fructose-2,6-bisphosphatase 4b isoform X4 [Hippoglossus hippoglossus];XP_034440519.1//6-phosphofructo-2-kinase/fructose-2,6-bisphosphatase 4b isoform X1 [Hippoglossus hippoglossus];XP_022601267.1//6-phosphofructo-2-kinase/fructose-2,6-bisphosphatase 4-…
SMAX5B_010493	CP026251.1	19377577..19384965	7.65594	-1.57895	-2.98752	0.000381003	0.00752156	1	protein_coding	K05081//prolactin receptor	XP_035497061.1//prolactin receptor b isoform X1 [Scophthalmus maximus]
SMAX5B_007858	CP026254.1	19927238..19937143	40.7642	-1.58499	-3.00006	5.25101e-07	2.55239e-05	0.0099638	protein_coding	K12394//AP-1 complex subunit sigma 1/2	XP_030429466.1//AP-1 complex subunit sigma-2 isoform X5 [Gopherus evgoodei];KAF5162075.1//hypothetical protein HST_G00145330 [Hippoglossus stenolepis]
SMAX5B_006714	CP026256.1	3436138..3453174	6.79098	-1.58743	-3.00513	0.00302731	0.038641	1	protein_coding	K16657//neurexophilin-2	AWP12760.1//putative neurexophilin-2 [Scophthalmus maximus]
SMAX5B_001635	CP026263.1	complement(1596995..1630571)	16.562	-1.58891	-3.00823	3.47494e-07	1.77689e-05	0.00659369	protein_coding	K13645//procollagen-lysine,2-oxoglutarate 5-dioxygenase 2 [EC:1.14.11.4]	XP_022622944.1//procollagen-lysine,2-oxoglutarate 5-dioxygenase 2 isoform X2 [Seriola dumerili];XP_022622943.1//procollagen-lysine,2-oxoglutarate 5-dioxygenase 2 isoform X1 [Seriola dumerili];XP_010751776.2//procollagen-lysine,2-oxoglutarate 5-dioxygenase 2 isoform X2 [Larimichthys crocea]
SMAX5B_002254	CP026248.1	complement(10395415..10406214)	6.93222	-1.59317	-3.01711	0.000697631	0.0122532	1	protein_coding	K08635//neprilysin [EC:3.4.24.11]	XP_026205935.1//membrane metallo-endopeptidase-like 1 [Anabas testudineus];KAF5172169.1//hypothetical protein HST_G00025450 [Hippoglossus stenolepis]
SMAX5B_022398	CP026254.1	complement(6805157..6844155)	6.94922	-1.59376	-3.01834	0.000523487	0.00970424	1	protein_coding	K23413//anosmin-1	AWP10689.1//putative anosmin-1-like [Scophthalmus maximus]
SMAX5B_007262	CP026250.1	14541058..14586065	81.0447	-1.5957	-3.02242	8.43492e-06	0.000303312	0.160053	protein_coding	K10352//myosin heavy chain;K04431//mitogen-activated protein kinase kinase 7 [EC:2.7.12.2]	AYN79348.1//MKK7 [Ctenopharyngodon idella];XP_028456601.1//dual specificity mitogen-activated protein kinase kinase 7 isoform X1 [Perca flavescens];XP_034543874.1//dual specificity mitogen-activated protein kinase kinase 7 isoform X2 [Notolabrus celidotus];XP_027138789.1//myosin-9 isoform X1 [Larimichthys crocea];XP_027138790.1//myosin-9 isoform X2 [Larimichthys crocea]
SMAX5B_016870	CP026257.1	complement(9824669..9832397)	29.1936	-1.59933	-3.03002	1.13345e-05	0.00039239	0.215072	protein_coding	K02599//Notch 1	XP_018515606.1//PREDICTED: oncoprotein-induced transcript 3 protein [Lates calcarifer];AWP14182.1//putative oncoprotein-induced transcript 3 protein [Scophthalmus maximus]
SMAX5B_005800	CP026261.1	complement(5690114..5736078)	8.69844	-1.59949	-3.03036	1.56904e-05	0.000519524	0.297726	protein_coding	K10352//myosin heavy chain	XP_026181169.1//myosin-10 isoform X2 [Mastacembelus armatus];XP_029014290.1//myosin-10 isoform X5 [Betta splendens];XP_019121493.2//myosin-10 isoform X1 [Larimichthys crocea]
SMAX5B_014713	CP026253.1	14351372..14358415	15.384	-1.60722	-3.04664	3.52772e-05	0.00105393	0.669384	protein_coding	K08118//biglycan	XP_018523617.1//PREDICTED: biglycan [Lates calcarifer]
SMAX5B_018648	CP026256.1	complement(4821357..4836216)	11.8455	-1.60917	-3.05077	0.000897857	0.0150582	1	protein_coding	K19387//polymerase I and transcript release factor	XP_035507167.1//caveolae-associated protein 2a [Scophthalmus maximus]
SMAX5B_010840	CP026251.1	7147412..7148762	42.4565	-1.61289	-3.05863	4.06709e-06	0.000159264	0.0771731	protein_coding	K04174//apelin receptor	XP_035496790.1//apelin receptor A [Scophthalmus maximus]
SMAX5B_020042	CP026261.1	20209399..20210713	46.9052	-1.6175	-3.06843	0.000636471	0.0113459	1	protein_coding	K19607//X-linked retinitis pigmentosa GTPase regulator;K23573//dentin sialophosphoprotein;K15626//nuclear protein, 1	XP_033367707.1//uncharacterized protein DDB_G0271670-like, partial [Parus major];AWP19515.1//putative nuclear protein 1-like [Scophthalmus maximus];PUA85553.1//DNA mismatch repair protein, C-terminal domain-containing protein [Toxoplasma gondii TgCATBr9]
SMAX5B_010428	CP026251.1	16586752..16609454	11.2356	-1.62552	-3.08553	9.67977e-05	0.00244413	1	protein_coding	K05080//growth hormone receptor	XP_035496335.1//growth hormone receptor a [Scophthalmus maximus]
SMAX5B_000443	CP026259.1	complement(11589484..11599857)	80.9645	-1.62986	-3.09483	3.20614e-11	3.4587e-09	6.08365e-07	protein_coding	K10061//C-type lectin superfamily 4 member G;K10059//C-type lectin domain family 4 member E;K06721//C-type lectin domain family 10 member A;K17513//C-type lectin superfamily 17 member A	XP_035467306.1//C-type lectin domain family 4 member G-like isoform X2 [Scophthalmus maximus];XP_035467307.1//CD209 antigen-like protein C isoform X3 [Scophthalmus maximus];XP_035467309.1//LOW QUALITY PROTEIN: CD209 antigen-like [Scophthalmus maximus];AWP16587.1//putative C-type lectin domain family 4 member M-like [Scophthalmus maximus];KAF0044432.1//hypothetical protein F2P81_003590 [Scophthalm…
SMAX5B_005030	CP026243.1	28908302..29003324	2.38934	-1.62987	-3.09485	0.00543824	0.0596281	1	protein_coding	K17442//zinc finger protein ZFPM2	AWO97079.1//putative zinc finger protein ZFPM2 [Scophthalmus maximus];XP_035461357.1//zinc finger protein ZFPM2a isoform X3 [Scophthalmus maximus]
SMAX5B_012135	CP026243.1	16846694..16871157	2.52905	-1.63151	-3.09837	0.00154865	0.0232396	1	protein_coding	K06770//myelin protein zero;K06081//poliovirus receptor-related protein 1;K06499//carcinoembryonic antigen-related cell adhesion molecule	AWO96337.1//putative carcinoembryonic antigen-related cell adhesion molecule 5-like [Scophthalmus maximus];XP_018527776.1//PREDICTED: carcinoembryonic antigen-related cell adhesion molecule 5-like [Lates calcarifer]
SMAX5B_000010	CP026262.1	complement(15410946..15447470)	2.52278	-1.63768	-3.11166	0.00919292	0.0874871	1	protein_coding	K15008//discs, large-associated protein 1;K23573//dentin sialophosphoprotein	AWP20246.1//putative disks large-associated protein 2-like [Scophthalmus maximus];XP_032440897.1//disks large-associated protein 2-like isoform X1 [Xiphophorus hellerii];XP_020483744.2//disks large-associated protein 2-like [Labrus bergylta];XP_034383576.1//disks large-associated protein 2-like [Cyclopterus lumpus]
SMAX5B_018680	CP026256.1	5970509..5975175	225.054	-1.63843	-3.11328	1.05671e-05	0.000368109	0.200511	protein_coding	K18162//NADH dehydrogenase [ubiquinone] 1 alpha subcomplex assembly factor 5 [EC:2.1.1.-];K05929//phosphoethanolamine N-methyltransferase [EC:2.1.1.103]	AWP12838.1//putative methyltransferase DDB G0268948 isoform 2 [Scophthalmus maximus];AWP12841.1//putative methyltransferase DDB G0268948 isoform 5 [Scophthalmus maximus];AWP12839.1//putative methyltransferase DDB G0268948 isoform 3 [Scophthalmus maximus];AWP12840.1//putative methyltransferase DDB G0268948 isoform 4 [Scophthalmus maximus];XP_035459992.1//putative methyltransferase DDB_G0268948 [Sc…
SMAX5B_006378	CP026261.1	complement(7252526..7315421)	2.46311	-1.64175	-3.12044	1.99043e-06	8.33461e-05	0.0377684	protein_coding	K10361//myosin XV	AWP18662.1//putative unconventional myosin-XV-like [Scophthalmus maximus]
SMAX5B_021819	CP026248.1	complement(23771991..23794873)	213.19	-1.64305	-3.12326	1.02267e-08	7.15484e-07	0.000194052	protein_coding	K15122//solute carrier family 41	KAF0035379.1//hypothetical protein F2P81_013137 [Scophthalmus maximus];XP_026162766.1//solute carrier family 41 member 1-like [Mastacembelus armatus];AWP03445.1//Solute carrier 41 isoform 3 [Scophthalmus maximus]
SMAX5B_019090	CP026255.1	3907508..3990471	9.04143	-1.64437	-3.12611	4.0484e-06	0.000158904	0.0768184	protein_coding	K06084//F-box protein 20	XP_034453682.1//LIM and calponin homology domains-containing protein 1-like isoform X11 [Hippoglossus hippoglossus];XP_035506663.1//LIM and calponin homology domains-containing protein 1-like [Scophthalmus maximus];XP_034453679.1//LIM and calponin homology domains-containing protein 1-like isoform X9 [Hippoglossus hippoglossus];AWP11698.1//putative LIM and calponin -likey domains-containing prote…
SMAX5B_008854	CP026255.1	12998819..13008861	20.0925	-1.64776	-3.13347	7.21513e-10	6.06253e-08	1.36907e-05	protein_coding	K05090//macrophage colony-stimulating factor 1 receptor [EC:2.7.10.1]	XP_035506128.1//macrophage colony-stimulating factor 1 receptor isoform X1 [Scophthalmus maximus];XP_035506129.1//macrophage colony-stimulating factor 1 receptor isoform X2 [Scophthalmus maximus]
SMAX5B_013575	CP026246.1	complement(25221222..25222620)	15.499	-1.6532	-3.1453	0.00201232	0.0285153	1	protein_coding	K09565//peptidyl-prolyl isomerase F (cyclophilin D) [EC:5.2.1.8]	AWP00753.1//putative peptidyl-prolyl cis-trans isomerase F mitochondrial-like [Scophthalmus maximus]
SMAX5B_003754	CP026244.1	complement(3627961..3630993)	27.3581	-1.65523	-3.14974	0.00222704	0.0306489	1	protein_coding	K02310//DNA fragmentation factor, 45 kD, alpha subunit;K01092//myo-inositol-1(or 4)-monophosphatase [EC:3.1.3.25]	XP_035469338.1//cell death activator CIDE-B [Scophthalmus maximus]
SMAX5B_014155	CP026248.1	complement(14639753..14644493)	38.718	-1.6645	-3.17004	2.73418e-07	1.44222e-05	0.00518811	protein_coding	K17920//sorting nexin-5/6/32	XP_035486284.1//sorting nexin-32 [Scophthalmus maximus]
SMAX5B_006555	CP026249.1	7859993..7862200	10.7235	-1.67357	-3.19003	9.69116e-05	0.00244413	1	protein_coding	K05706//snail 2	XP_015812224.1//PREDICTED: zinc finger protein SNAI2 [Nothobranchius furzeri]
SMAX5B_020020	CP026246.1	19911572..19954747	3.36181	-1.68502	-3.21546	0.000993688	0.0164063	1	protein_coding	K12388//sortilin	AWP00583.1//putative VPS10 domain-containing receptor SorCS2, partial [Scophthalmus maximus]
SMAX5B_018090	CP026257.1	4830376..4831498	21.2545	-1.6862	-3.21809	0.000134728	0.0032078	1	protein_coding	K13073//polymeric immunoglobulin receptor	AWP13909.1//putative polymeric immunoglobulin receptor-like [Scophthalmus maximus]
SMAX5B_014905	CP026253.1	20064872..20065834	19.4482	-1.69114	-3.22911	0.000402572	0.00784546	1	protein_coding	K04270//P2Y purinoceptor 1	XP_035501927.1//P2Y purinoceptor 1-like [Scophthalmus maximus]
SMAX5B_005685	CP026247.1	complement(4925168..5044633)	8.03202	-1.69326	-3.23387	0.00162436	0.0241176	1	protein_coding	K17294//tetraspanin-4	XP_035484888.1//tetraspanin-4a isoform X3 [Scophthalmus maximus];XP_035484886.1//tetraspanin-4a isoform X1 [Scophthalmus maximus]
SMAX5B_008975	CP026259.1	complement(2018435..2022848)	6.32439	-1.69803	-3.24457	0.00296814	0.0381185	1	protein_coding	K14786//protein KRI1	XP_035465311.1//uncharacterized protein ky [Scophthalmus maximus];KAF0043829.1//hypothetical protein F2P81_002987 [Scophthalmus maximus]
SMAX5B_010129	CP026252.1	12204956..12218784	18.6371	-1.7082	-3.26752	1.03463e-07	6.13478e-06	0.00196321	protein_coding	K08654//proprotein convertase subtilisin/kexin type 5 [EC:3.4.21.-];K09662//N-acetylglucosaminyltransferase 3, mucin type [EC:2.4.1.-]	AWP08433.1//putative proprotein convertase subtilisin/kexin type 5-like [Scophthalmus maximus];XP_023278199.1//proprotein convertase subtilisin/kexin type 5-like isoform X1 [Seriola lalandi dorsalis]
SMAX5B_007185	CP026249.1	2128211..2133764	9.04164	-1.71495	-3.28286	0.000941029	0.0156567	1	protein_coding	K05044//solute carrier family 6 (neurotransmitter transporter, GABA) member 11	KAF0046718.1//hypothetical protein F2P81_000351 [Scophthalmus maximus]
SMAX5B_011873	CP026243.1	complement(26228761..26234936)	53.6845	-1.71656	-3.28652	1.89105e-09	1.47071e-07	3.58826e-05	protein_coding	K08665//hepsin [EC:3.4.21.106]	XP_035501417.1//serine protease hepsin isoform X1 [Scophthalmus maximus];XP_035502190.1//serine protease hepsin isoform X2 [Scophthalmus maximus]
SMAX5B_015787	CP026264.1	complement(9298089..9334507)	3.85063	-1.71759	-3.28886	0.00132996	0.0206101	1	protein_coding	K04929//potassium voltage-gated channel KQT-like subfamily member 4	XP_034154690.1//potassium voltage-gated channel subfamily KQT member 4 isoform X1 [Pangasianodon hypophthalmus];XP_029022482.1//potassium voltage-gated channel subfamily KQT member 4 isoform X1 [Betta splendens];XP_035477310.1//potassium voltage-gated channel subfamily KQT member 4 isoform X7 [Scophthalmus maximus];AWP21709.1//putative potassium voltage-gated channel subfamily KQT member 4-like […
SMAX5B_022275	CP026254.1	14808451..14812906	20.4366	-1.72137	-3.29749	3.02434e-06	0.000120692	0.0573869	protein_coding	K01059//lipoprotein lipase [EC:3.1.1.34]	AWP11060.1//Lipoprotein lipase [Scophthalmus maximus]
SMAX5B_009937	CP026252.1	complement(14198394..14220170)	8.2803	-1.72246	-3.29999	7.56837e-08	4.60184e-06	0.0014361	protein_coding	K19398//Bardet-Biedl syndrome 9 protein	AWP08545.1//putative kielin/chordin-like protein [Scophthalmus maximus];XP_035499032.1//kielin/chordin-like protein isoform X2 [Scophthalmus maximus]
SMAX5B_019900	CP026245.1	8492481..8612863	2.26336	-1.72526	-3.30639	0.000161749	0.00372906	1	protein_coding	K06753//roundabout, axon guidance receptor 1	XP_035479142.1//roundabout homolog 1 isoform X1 [Scophthalmus maximus];XP_035479148.1//roundabout homolog 1 isoform X5 [Scophthalmus maximus];AWO98757.1//putative roundabout -like 1 [Scophthalmus maximus];XP_035479144.1//roundabout homolog 1 isoform X2 [Scophthalmus maximus]
SMAX5B_011393	CP026250.1	7654602..7683825	9.28185	-1.72848	-3.31378	2.2973e-12	2.97776e-10	4.35912e-08	protein_coding	K23383//FRAS1-related extracellular matrix protein 3	XP_034437234.1//FRAS1-related extracellular matrix protein 3 [Hippoglossus hippoglossus]
SMAX5B_006066	CP026249.1	complement(13030383..13044642)	48.2935	-1.73102	-3.31962	2.31194e-06	9.52166e-05	0.043869	protein_coding	K15116//solute carrier family 25, member 33/36	XP_021028483.1//solute carrier family 25 member 36 [Mus caroli];KAF0047107.1//hypothetical protein F2P81_000740 [Scophthalmus maximus];XP_035489986.1//solute carrier family 25 member 36-A [Scophthalmus maximus]
SMAX5B_010930	CP026251.1	complement(11137761..11155195)	54.5427	-1.73219	-3.32232	1.24391e-11	1.42462e-09	2.36032e-07	protein_coding	K20910//thioredoxin-interacting protein;K08886//activated CDC42 kinase 1 [EC:2.7.10.2 2.7.11.1];K20493//leucine-rich repeat-containing protein 16;K02324//DNA polymerase epsilon subunit 1 [EC:2.7.7.7]	XP_035494899.1//arrestin domain-containing protein 4-like [Scophthalmus maximus];AWP06943.1//putative arrestin domain-containing protein 3-like [Scophthalmus maximus];AWP06944.1//putative arrestin domain-containing protein 3-like isoform 2 [Scophthalmus maximus]
SMAX5B_018371	CP026256.1	complement(14440457..14455372)	5.28404	-1.73524	-3.32935	0.00344748	0.042859	1	protein_coding	K06556//CD200 antigen	KAF0026546.1//hypothetical protein F2P81_021283 [Scophthalmus maximus];XP_033965326.1//OX-2 membrane glycoprotein [Pseudochaenichthys georgianus];AWP13256.1//putative poliovirus receptor -like [Scophthalmus maximus]
SMAX5B_012909	CP026246.1	28483072..28495899	3.64182	-1.73535	-3.32959	0.00375733	0.0457587	1	protein_coding	K19985//exocyst complex component 6;K10609//cullin 4	AWP00882.1//putative heat shock 70 kDa protein 12B [Scophthalmus maximus]
SMAX5B_009614	CP026264.1	11574278..11579701	16.7766	-1.74295	-3.34718	1.94263e-08	1.30453e-06	0.000368614	protein_coding	K19475//WAS/WASL-interacting protein	XP_034455988.1//WAS/WASL-interacting protein family member 3 [Hippoglossus hippoglossus];AWP21845.1//putative WAS/WASL-interacting protein family member 3-like [Scophthalmus maximus];XP_029938177.1//WAS/WASL-interacting protein family member 3-like isoform X2 [Salarias fasciatus];XP_035476514.1//WAS/WASL-interacting protein family member 3 isoform X4 [Scophthalmus maximus]
SMAX5B_011914	CP026243.1	22111821..22137159	111.329	-1.75356	-3.3719	6.43219e-09	4.57671e-07	0.000122051	protein_coding	K04245//chemokine-like receptor 1	AWO96828.1//putative C3a anaphylatoxin chemotactic receptor-like [Scophthalmus maximus];AWO96827.1//putative chemokine-like receptor 1 [Scophthalmus maximus]
SMAX5B_012358	CP026247.1	complement(16744478..16812270)	0.938809	-1.75508	-3.37545	0.00420677	0.0499939	1	protein_coding	K10404//kinesin family member 26	XP_035483518.1//LOW QUALITY PROTEIN: kinesin-like protein KIF26B [Scophthalmus maximus];AWP01770.1//putative kinesin-like protein KIF26B [Scophthalmus maximus]
SMAX5B_008169	CP026262.1	9954160..9955648	40.4876	-1.76753	-3.40471	1.20673e-06	5.36642e-05	0.0228977	protein_coding	K09072//musculin (activated B-cell factor-1)	XP_035472568.1//transcription factor 21 [Scophthalmus maximus]
SMAX5B_007994	CP026247.1	complement(1516327..1534630)	1.38266	-1.76815	-3.40616	0.00885901	0.0850842	1	protein_coding	K06792//aggrecan 1	AWP01096.1//putative aggrecan core protein-like [Scophthalmus maximus]
SMAX5B_005787	CP026249.1	complement(9918945..9922828)	612.344	-1.77013	-3.41085	3.06556e-07	1.59686e-05	0.00581691	protein_coding	K00830//alanine-glyoxylate transaminase / serine-glyoxylate transaminase / serine-pyruvate transaminase [EC:2.6.1.44 2.6.1.45 2.6.1.51]	AWP04090.1//Serine--pyruvate aminotransferase isoform 2 [Scophthalmus maximus];AWP04089.1//Serine--pyruvate aminotransferase [Scophthalmus maximus]
SMAX5B_002315	CP026248.1	complement(11107899..11113278)	31.8426	-1.77889	-3.43162	0.00376283	0.0457587	1	protein_coding	K13937//hexose-6-phosphate dehydrogenase [EC:1.1.1.47 3.1.1.31]	KAF0034827.1//hypothetical protein F2P81_012585 [Scophthalmus maximus]
SMAX5B_019968	CP026245.1	5529508..5534224	68.386	-1.7809	-3.4364	2.98198e-10	2.72468e-08	5.6583e-06	protein_coding	K17859//cytochrome P450 family 2 subfamily Y	XP_031141015.1//cytochrome P450 2F3-like isoform X1 [Sander lucioperca];XP_019943606.1//PREDICTED: cytochrome P450 2G1-like [Paralichthys olivaceus]
SMAX5B_000700	CP026245.1	complement(20689362..20712343)	25.7497	-1.78777	-3.4528	2.66496e-07	1.41921e-05	0.00505676	protein_coding	K05037//solute carrier family 6 (neurotransmitter transporter, serotonin) member 4	XP_029923553.1//sodium-dependent serotonin transporter [Myripristis murdjan];XP_021583815.1//sodium-dependent serotonin transporter [Ictidomys tridecemlineatus]
SMAX5B_021917	CP026259.1	complement(6816477..6820652)	10.865	-1.78945	-3.45684	5.07582e-07	2.47442e-05	0.00963137	protein_coding	K20177//vacuolar protein sorting-associated protein 3	AWP16313.1//putative transforming growth factor-beta receptor-associated protein 1-like [Scophthalmus maximus];XP_035466840.1//transforming growth factor-beta receptor-associated protein 1 isoform X1 [Scophthalmus maximus]
SMAX5B_003545	CP026258.1	complement(7144482..7176431)	18.4099	-1.79126	-3.46117	1.66609e-09	1.30792e-07	3.1614e-05	protein_coding	K00314//sarcosine dehydrogenase [EC:1.5.8.3]	AWP15128.1//putative sarcosine dehydrogenase mitochondrial [Scophthalmus maximus];XP_035523772.1//sarcosine dehydrogenase, mitochondrial [Morone saxatilis]
SMAX5B_009294	CP026255.1	9566391..9588898	14.1888	-1.79427	-3.46839	1.49626e-06	6.49845e-05	0.0283916	protein_coding	K12010//tripartite motif-containing protein 29;K01124//glycerophosphoinositol inositolphosphodiesterase [EC:3.1.4.43];K20632//deleted in liver cancer protein	XP_035505948.1//glycerophosphoinositol inositolphosphodiesterase GDPD2 isoform X4 [Scophthalmus maximus];AWP11911.1//hypothetical protein SMAX5B_009294 [Scophthalmus maximus];XP_035505949.1//glycerophosphoinositol inositolphosphodiesterase GDPD2 isoform X5 [Scophthalmus maximus];XP_035505952.1//START domain containing 14 isoform X2 [Scophthalmus maximus]
SMAX5B_001898	CP026263.1	complement(10217572..10221272)	10.7974	-1.8068	-3.49865	7.34876e-05	0.0019351	1	protein_coding	K11182//diamine oxidase [EC:1.4.3.22]	AWP20965.1//putative amiloride-sensitive amine oxidase [Scophthalmus maximus]
SMAX5B_010131	CP026252.1	15808896..15817728	23.8537	-1.80874	-3.50337	1.27102e-05	0.000430216	0.241176	protein_coding	K01251//adenosylhomocysteinase [EC:3.3.1.1]	XP_019935097.1//PREDICTED: adenosylhomocysteinase 2-like isoform X3 [Paralichthys olivaceus];AWP08630.1//Adenosylhomocysteinase [Scophthalmus maximus]
SMAX5B_015277	CP026243.1	complement(2559397..2563768)	27.5863	-1.81135	-3.50972	6.82296e-07	3.21371e-05	0.0129466	protein_coding	K00515//beta-carotene 15,15'-dioxygenase [EC:1.13.11.63]	XP_035487532.1//beta-carotene oxygenase 1, like [Scophthalmus maximus]
SMAX5B_003140	CP026264.1	complement(419252..426882)	84.7265	-1.81344	-3.5148	1.84332e-09	1.44029e-07	3.4977e-05	protein_coding	K06771//myelin associated glycoprotein;K12460//ankyrin repeat-rich membrane spanning protein	AWP21143.1//putative myelin-associated glycoprotein-like [Scophthalmus maximus];XP_035477377.1//sialoadhesin [Scophthalmus maximus]
SMAX5B_018068	CP026257.1	6193228..6201965	291.633	-1.8238	-3.54011	1.42674e-07	8.14217e-06	0.00270724	protein_coding	K00789//S-adenosylmethionine synthetase [EC:2.5.1.6]	XP_022045789.1//S-adenosylmethionine synthase isoform X1 [Acanthochromis polyacanthus];XP_035461085.1//S-adenosylmethionine synthase isoform X1 [Scophthalmus maximus]
SMAX5B_003785	CP026244.1	complement(3496444..3577716)	18.8597	-1.83042	-3.55642	2.82871e-14	5.19768e-12	5.36748e-10	protein_coding	K17495//CUB and sushi domain-containing protein	AWO97474.1//putative sushi von Willebrand factor type A EGF and pentraxin domain-containing protein 1 [Scophthalmus maximus];XP_035469095.1//LOW QUALITY PROTEIN: sushi, von Willebrand factor type A, EGF and pentraxin domain-containing protein 1 [Scophthalmus maximus]
SMAX5B_000381	CP026259.1	12508720..12519229	6.84729	-1.83116	-3.55823	0.00165867	0.0244357	1	protein_coding	K10367//formin 1	AWP16639.1//hypothetical protein SMAX5B_000381 [Scophthalmus maximus]
SMAX5B_002311	CP026248.1	complement(12873695..12914530)	13.5527	-1.83458	-3.56667	2.98915e-06	0.000119573	0.0567191	protein_coding	K19558//neuroblastoma suppressor of tumorigenicity 1;K11448//lysine-specific demethylase 6B [EC:1.14.11.68]	AWP02835.1//putative von Willebrand factor A domain-containing protein 1 [Scophthalmus maximus];KFM60995.1//hypothetical protein X975_04887, partial [Stegodyphus mimosarum];XP_035487114.1//transmembrane protein 88 [Scophthalmus maximus]
SMAX5B_004436	CP026244.1	612576..613259	44.8181	-1.84494	-3.59238	6.2731e-07	2.9799e-05	0.0119032	protein_coding	K04197//endothelin receptor type A	AWO97240.1//putative endothelin-1 receptor-like [Scophthalmus maximus]
SMAX5B_011021	CP026251.1	9511822..9594735	8.32255	-1.84874	-3.60186	3.54021e-06	0.000139943	0.0671756	protein_coding	K17630//Ras GTPase-activating protein 4;K19475//WAS/WASL-interacting protein;K17632//RAS protein activator-like 1;K19938//rabphilin-3A	AWP06900.1//putative multiple C2 and transmembrane domain-containing protein 1 [Scophthalmus maximus];XP_035496087.1//multiple C2 and transmembrane domain-containing protein 1 isoform X1 [Scophthalmus maximus];XP_035496093.1//multiple C2 and transmembrane domain-containing protein 1 isoform X7 [Scophthalmus maximus];XP_035496088.1//multiple C2 and transmembrane domain-containing protein 1 isoform…
SMAX5B_022506	CP026254.1	complement(16131671..16137975)	3.43047	-1.85897	-3.62749	0.00191915	0.027498	1	protein_coding	K15680//corticosteroid 11-beta-dehydrogenase isozyme 1 [EC:1.1.1.146]	XP_035504417.1//hydroxysteroid 11-beta-dehydrogenase 1-like protein [Scophthalmus maximus]
SMAX5B_008819	CP026255.1	13818089..13827263	7.08628	-1.86275	-3.63699	0.000219141	0.0047526	1	protein_coding	K04136//adrenergic receptor alpha-1B	XP_035506370.1//alpha-1A adrenergic receptor-like [Scophthalmus maximus]
SMAX5B_021502	CP026246.1	complement(3278538..3287298)	7.00613	-1.87345	-3.66408	0.000565379	0.0103432	1	protein_coding	K18439//Arf-GAP with Rho-GAP domain, ANK repeat and PH domain-containing protein 1	XP_035481545.1//arf-GAP with Rho-GAP domain, ANK repeat and PH domain-containing protein 1 [Scophthalmus maximus];AWO99733.1//putative arf-GAP with Rho-GAP domain ANK repeat and PH domain-containing protein 1-like [Scophthalmus maximus]
SMAX5B_012100	CP026243.1	22107752..22111797	25.4144	-1.87382	-3.665	0.000105207	0.00261004	1	protein_coding	K04245//chemokine-like receptor 1	AWO96827.1//putative chemokine-like receptor 1 [Scophthalmus maximus]
SMAX5B_007596	CP026250.1	complement(14882130..14890829)	31.9438	-1.87497	-3.66795	5.86686e-07	2.80285e-05	0.0111324	protein_coding	K17517//C-type lectin domain family 12 member B;K06721//C-type lectin domain family 10 member A	XP_035492780.1//uncharacterized protein LOC118312358 [Scophthalmus maximus];AWP05888.1//putative CD209 antigen-like [Scophthalmus maximus]
SMAX5B_012418	CP026247.1	8080858..8107153	6.21977	-1.87734	-3.67397	0.000763193	0.0131696	1	protein_coding	K15010//homer	XP_008308697.1//homer protein homolog 2 isoform X1 [Cynoglossus semilaevis];XP_035538181.1//homer protein homolog 2 [Morone saxatilis];XP_035484248.1//homer protein homolog 2 isoform X2 [Scophthalmus maximus]
SMAX5B_020922	CP026261.1	complement(13122244..13124281)	5.06014	-1.88177	-3.68528	0.00540072	0.0594115	1	protein_coding	K12015//tripartite motif-containing protein 39 [EC:2.3.2.27]	XP_035469989.1//nuclear factor 7, brain [Scophthalmus maximus]
SMAX5B_009443	CP026255.1	complement(9913438..9915957)	2.48686	-1.88363	-3.69001	0.00816761	0.0808746	1	protein_coding	K09627//serine protease 23 [EC:3.4.21.-]	KAF0039832.1//hypothetical protein F2P81_008067 [Scophthalmus maximus];AWP11935.1//putative serine protease 23-like [Scophthalmus maximus]
SMAX5B_021966	CP026259.1	5550288..5557106	70.0905	-1.88447	-3.69216	6.23088e-10	5.3429e-08	1.18231e-05	protein_coding	K07593//MFS transporter, SP family, solute carrier family 2 (facilitated glucose transporter), member 2	XP_035529715.1//solute carrier family 2, facilitated glucose transporter member 2 [Morone saxatilis];XP_034433038.1//solute carrier family 2, facilitated glucose transporter member 2 [Hippoglossus hippoglossus]
SMAX5B_004460	CP026244.1	613557..617377	43.4104	-1.88523	-3.69412	2.19707e-07	1.19276e-05	0.00416893	protein_coding	K04197//endothelin receptor type A	XP_023254874.1//endothelin receptor type B-like [Seriola lalandi dorsalis];KAF0028982.1//hypothetical protein F2P81_018087 [Scophthalmus maximus]
SMAX5B_006762	CP026246.1	complement(6230253..6243925)	5.64929	-1.88801	-3.70125	6.57409e-05	0.00176273	1	protein_coding	K06702//CDW93 antigen;K06706//CD248 antigen, endosialin	XP_035482523.1//endosialin-like isoform X2 [Scophthalmus maximus];AWO99890.1//putative endosialin [Scophthalmus maximus];AWO99891.1//putative endosialin isoform 2 [Scophthalmus maximus]
SMAX5B_002129	CP026243.1	289875..293233	31.3956	-1.89803	-3.72705	0.00347417	0.0430628	1	protein_coding	K01314//coagulation factor X [EC:3.4.21.6];K01320//coagulation factor VII [EC:3.4.21.21]	XP_035500830.1//protein Z, vitamin K-dependent plasma glycoprotein b [Scophthalmus maximus]
SMAX5B_020198	CP026260.1	6371378..6373976	17.1567	-1.89824	-3.72758	0.000109123	0.00267542	1	protein_coding	K16949//amine sulfotransferase [EC:2.8.2.3]	XP_035469099.1//amine sulfotransferase-like [Scophthalmus maximus]
SMAX5B_001039	CP026254.1	complement(209959..219940)	55.7973	-1.90957	-3.75698	0.00140467	0.0214694	1	protein_coding	K16724//SCL-interrupting locus protein;K03911//antithrombin III	AWP10429.1//putative antithrombin-III [Scophthalmus maximus]
SMAX5B_015087	CP026258.1	complement(2850111..2858296)	6.44255	-1.91126	-3.76138	0.00197956	0.0281944	1	protein_coding	K01509//adenosinetriphosphatase [EC:3.6.1.3]	XP_035463844.1//ectonucleoside triphosphate diphosphohydrolase 2 [Scophthalmus maximus]
SMAX5B_006293	CP026249.1	8556724..8563663	41.5281	-1.9148	-3.77063	1.81222e-08	1.2318e-06	0.000343869	protein_coding	K08606//meprin B [EC:3.4.24.63]	AWP04004.1//putative meprin A subunit beta [Scophthalmus maximus]
SMAX5B_000212	CP026262.1	17916551..17926694	297.934	-1.92142	-3.78796	0.00325697	0.0408245	1	protein_coding	K01315//plasminogen [EC:3.4.21.7]	AWP20378.1//plg wu:fb70e09 isoform 4 [Scophthalmus maximus];AWP20375.1//plg wu:fb70e09 [Scophthalmus maximus]
SMAX5B_009880	CP026252.1	9451272..9458044	233.471	-1.92874	-3.80724	6.56017e-09	4.64799e-07	0.000124479	protein_coding	K01745//histidine ammonia-lyase [EC:4.3.1.3]	AWP08205.1//Histidine ammonia-lyase [Scophthalmus maximus]
SMAX5B_015726	CP026264.1	6179175..6181775	6.92908	-1.93001	-3.81058	0.00821444	0.0808746	1	protein_coding	K09878//aquaporin-10	XP_035475972.1//aquaporin-10b isoform X1 [Scophthalmus maximus]
SMAX5B_006075	CP026249.1	complement(5725047..5739399)	1508.35	-1.93184	-3.8154	2.12313e-05	0.000677496	0.402863	protein_coding	NA	AWP03829.1//Hypothetical protein SMAX5B_006075 [Scophthalmus maximus];AWP03831.1//Hypothetical protein SMAX5B_006075 [Scophthalmus maximus];AWP03827.1//Hypothetical protein SMAX5B_006075 [Scophthalmus maximus]
SMAX5B_013447	CP026245.1	complement(14384298..14389488)	76.0785	-1.93747	-3.83035	0.00171937	0.0251088	1	protein_coding	K06251//vitronectin	AWO99076.1//putative vitronectin [Scophthalmus maximus]
SMAX5B_022707	CP026243.1	8557198..8562108	134.707	-1.93807	-3.83193	1.47728e-12	2.02472e-10	2.80314e-08	protein_coding	K04008//CD59 antigen	AWO95935.1//putative three finger toxin MALT0070C-like [Scophthalmus maximus]
SMAX5B_019676	CP026262.1	13827660..13842631	0.906311	-1.94115	-3.84011	0.00426509	0.0504679	1	protein_coding	K14462//apolipoprotein B	AWP20153.1//putative apolipoprotein B-100-like [Scophthalmus maximus]
SMAX5B_008855	CP026255.1	13248731..13341421	6.63499	-1.94369	-3.84689	9.15339e-08	5.44676e-06	0.00173686	protein_coding	K08618//a disintegrin and metalloproteinase with thrombospondin motifs 2 [EC:3.4.24.14]	XP_022045204.1//A disintegrin and metalloproteinase with thrombospondin motifs 2-like isoform X1 [Acanthochromis polyacanthus];AWP12163.1//putative disintegrin and metalloproteinase with thrombospondin motifs 2-like [Scophthalmus maximus];KAF0039408.1//hypothetical protein F2P81_007643 [Scophthalmus maximus]
SMAX5B_008578	CP026257.1	12914975..12929136	9.11074	-1.9446	-3.84932	0.00038569	0.00757971	1	protein_coding	K23379//extracelluar matrix protein FRAS1;K14566//U3 small nucleolar RNA-associated protein 24	XP_035461004.1//brorin [Scophthalmus maximus];KAF0027219.1//hypothetical protein F2P81_019960 [Scophthalmus maximus]
SMAX5B_018525	CP026256.1	11764897..11770706	2.44096	-1.94724	-3.85636	0.00712457	0.0732207	1	protein_coding	K00710//polypeptide N-acetylgalactosaminyltransferase [EC:2.4.1.41]	XP_022596283.1//polypeptide N-acetylgalactosaminyltransferase 3 [Seriola dumerili];AWP13071.1//Polypeptide N-acetylgalactosaminyltransferase [Scophthalmus maximus]
SMAX5B_001353	CP026252.1	8577389..8652938	5.49065	-1.9474	-3.85679	2.93092e-06	0.000117808	0.0556143	protein_coding	K09609//a disintegrin and metalloproteinase with thrombospondin motifs 20 [EC:3.4.24.-]	AWP08154.1//putative disintegrin and metalloproteinase with thrombospondin motifs 20 [Scophthalmus maximus];XP_023256050.1//A disintegrin and metalloproteinase with thrombospondin motifs 20-like [Seriola lalandi dorsalis]
SMAX5B_012068	CP026243.1	19754665..19768043	198.599	-1.949	-3.86108	6.57595e-07	3.11491e-05	0.0124779	protein_coding	K05658//ATP-binding cassette, subfamily B (MDR/TAP), member 1 [EC:7.6.2.2]	AWO96609.1//hypothetical protein SMAX5B_012068 [Scophthalmus maximus];XP_035482908.1//ATP-binding cassette, sub-family B (MDR/TAP), member 4 [Scophthalmus maximus]
SMAX5B_013563	CP026246.1	complement(25040164..25050747)	9.03646	-1.9556	-3.87877	0.00616509	0.0656601	1	protein_coding	K01019//galactosylceramide sulfotransferase [EC:2.8.2.11];K19625//retinaldehyde-binding protein 1;K17981//mitochondrial fission process protein 1	XP_035482929.1//SEC14-like protein 2 [Scophthalmus maximus]
SMAX5B_019638	CP026262.1	11287368..11291842	8.72551	-1.96407	-3.9016	0.000108996	0.00267542	1	protein_coding	K05228//proopiomelanocortin	KAF0023541.1//hypothetical protein F2P81_024171 [Scophthalmus maximus]
SMAX5B_009779	CP026252.1	complement(11151476..11158730)	74.4481	-1.96719	-3.91006	3.27453e-15	7.01967e-13	6.21342e-11	protein_coding	K16816//patatin-like phospholipase domain-containing protein 2 [EC:3.1.1.3]	AWP08345.1//Adipose triglyceride lipase [Scophthalmus maximus]
SMAX5B_020656	CP026243.1	complement(29634708..29643689)	2.14941	-1.98469	-3.95778	0.00771927	0.0775685	1	protein_coding	K09275//transcription factor CP2 and related proteins	AWO97116.1//putative grainyhead-like protein 2 -like [Scophthalmus maximus];XP_035491552.1//grainyhead-like protein 2 homolog isoform X1 [Scophthalmus maximus]
SMAX5B_010483	CP026251.1	20090340..20091140	8.22942	-1.98502	-3.95868	0.00215432	0.0299574	1	protein_coding	K06232//growth arrest-specific 1	XP_035496741.1//growth arrest-specific protein 1a [Scophthalmus maximus]
SMAX5B_014150	CP026248.1	19914325..19923614	154.079	-1.98846	-3.96814	3.73787e-08	2.35853e-06	0.000709262	protein_coding	K19030//6-phosphofructo-2-kinase / fructose-2,6-biphosphatase 4 [EC:2.7.1.105 3.1.3.46]	XP_032369244.1//6-phosphofructo-2-kinase/fructose-2,6-bisphosphatase 4-like isoform X1 [Etheostoma spectabile];XP_031134432.1//6-phosphofructo-2-kinase/fructose-2,6-bisphosphatase 4a isoform X3 [Sander lucioperca];XP_032369246.1//6-phosphofructo-2-kinase/fructose-2,6-bisphosphatase 4-like isoform X3 [Etheostoma spectabile];XP_031134440.1//6-phosphofructo-2-kinase/fructose-2,6-bisphosphatase 4a is…
SMAX5B_007297	CP026250.1	complement(11833473..11867732)	0.937462	-1.99049	-3.97371	0.00776327	0.0778702	1	protein_coding	K16498//protocadherin delta 1	AWP05693.1//putative protocadherin-7-like [Scophthalmus maximus]
SMAX5B_014372	CP026248.1	13872098..13874771	4.07293	-1.9923	-3.9787	0.00658541	0.0688947	1	protein_coding	K10955//mucin-2;K05466//angiopoietin 2	XP_035488669.1//fibroleukin [Scophthalmus maximus]
SMAX5B_001628	CP026263.1	3220242..3361273	8.3489	-2.02041	-4.05698	1.97779e-12	2.62465e-10	3.75286e-08	protein_coding	K17588//phosphatidylinositol 3,4,5-trisphosphate-dependent Rac exchanger 2 protein;K23573//dentin sialophosphoprotein;K17442//zinc finger protein ZFPM2	AWP20697.1//Phosphatidylinositol 3-4-5-trisphosphate-dependent Rac exchanger 2 protein isoform 2 [Scophthalmus maximus];AWP20696.1//Phosphatidylinositol 3-4-5-trisphosphate-dependent Rac exchanger 2 protein [Scophthalmus maximus];XP_035475614.1//uncharacterized protein C8orf34 homolog isoform X2 [Scophthalmus maximus];XP_035475246.1//phosphatidylinositol 3,4,5-trisphosphate-dependent Rac exchange…
SMAX5B_006656	CP026249.1	complement(5873763..5877828)	11.264	-2.02853	-4.07989	7.00647e-05	0.00185666	1	protein_coding	NA	AWP03842.1//putative transmembrane protein 236-like [Scophthalmus maximus];KAF0046778.1//hypothetical protein F2P81_000411 [Scophthalmus maximus]
SMAX5B_005405	CP026244.1	12518822..12527319	12.7366	-2.0338	-4.09481	2.15269e-09	1.66644e-07	4.08474e-05	protein_coding	K05723//FYVE, RhoGEF and PH domain containing 4	XP_035476244.1//FYVE, RhoGEF and PH domain-containing protein 4-like isoform X1 [Scophthalmus maximus]
SMAX5B_015141	CP026258.1	complement(5820773..5825624)	2.47983	-2.03781	-4.10621	0.0072906	0.0743464	1	protein_coding	K08486//syntaxin 1B/2/3	XP_035464885.1//syntaxin-2-like isoform X2 [Scophthalmus maximus];AWP15073.1//putative syntaxin-2-like isoform 5 [Scophthalmus maximus];XP_035464884.1//syntaxin-2-like isoform X1 [Scophthalmus maximus]
SMAX5B_022606	CP026254.1	6903583..6976525	3.22929	-2.03916	-4.11007	1.71093e-08	1.16769e-06	0.00032465	protein_coding	K17341//hemicentin	AWP10692.1//putative hemicentin-1 [Scophthalmus maximus]
SMAX5B_008453	CP026245.1	2214492..2237991	22.2716	-2.04148	-4.11667	1.54571e-06	6.69583e-05	0.0293299	protein_coding	K00306//sarcosine oxidase / L-pipecolate oxidase [EC:1.5.3.1 1.5.3.7]	XP_035479407.1//peroxisomal sarcosine oxidase isoform X1 [Scophthalmus maximus]
SMAX5B_001761	CP026250.1	complement(18407133..18420066)	2.73944	-2.04512	-4.12708	0.00429323	0.0505543	1	protein_coding	K16861//inactive phospholipase D5	AWP06165.1//putative inactive phospholipase D5-like [Scophthalmus maximus];XP_033479541.1//inactive phospholipase D5 [Epinephelus lanceolatus];XP_035494183.1//inactive phospholipase D5 isoform X1 [Scophthalmus maximus]
SMAX5B_008248	CP026262.1	9390312..9396916	4.35568	-2.0469	-4.13216	0.000603582	0.0108755	1	protein_coding	K00649//glyceronephosphate O-acyltransferase [EC:2.3.1.42]	AWP19898.1//putative dihydroxyacetone phosphate acyltransferase [Scophthalmus maximus]
SMAX5B_008282	CP026262.1	complement(9399775..9421427)	13.026	-2.05021	-4.14165	7.47804e-10	6.22091e-08	1.41896e-05	protein_coding	K20045//intersectin	XP_032398387.1//intersectin-2 isoform X9 [Etheostoma spectabile];AWP19900.1//putative intersectin-2 [Scophthalmus maximus];XP_035473799.1//LOW QUALITY PROTEIN: intersectin-2-like [Scophthalmus maximus]
SMAX5B_004462	CP026244.1	1308412..1314222	82.646	-2.05722	-4.16184	0.00595368	0.063856	1	protein_coding	K00512//steroid 17alpha-monooxygenase / 17alpha-hydroxyprogesterone deacetylase [EC:1.14.14.19 1.14.14.32]	AWO97316.1//CYP17II 17-alpha-hydroxylase [Scophthalmus maximus]
SMAX5B_013406	CP026245.1	11412489..11416761	2.78199	-2.06427	-4.18222	0.00116875	0.0186298	1	protein_coding	K04298//P2Y purinoceptor 12	AWO98898.1//putative P2Y purinoceptor 12-like [Scophthalmus maximus];XP_035478049.1//P2Y purinoceptor 12 [Scophthalmus maximus]
SMAX5B_007152	CP026252.1	complement(4525995..4537324)	40.2286	-2.06504	-4.18447	5.76754e-07	2.76329e-05	0.0109439	protein_coding	K11153//retinol dehydrogenase 12 [EC:1.1.1.300];K13368//17beta-estradiol 17-dehydrogenase / 3alpha(17beta)-hydroxysteroid dehydrogenase (NAD+) [EC:1.1.1.62 1.1.1.239];K00079//carbonyl reductase 1 [EC:1.1.1.184 1.1.1.189 1.1.1.197];K08802//SNF related kinase [EC:2.7.11.1]	XP_035497518.1//uncharacterized oxidoreductase C663.09c [Scophthalmus maximus]
SMAX5B_014270	CP026248.1	20619054..20630006	2.4566	-2.07651	-4.21787	0.00266516	0.035173	1	protein_coding	K08601//ubiquitin carboxyl-terminal hydrolase CYLD [EC:3.4.19.12];K00681//gamma-glutamyltranspeptidase / glutathione hydrolase [EC:2.3.2.2 3.4.19.13]	AWP03331.1//putative ubiquitin carboxyl-terminal hydrolase CYLD [Scophthalmus maximus]
SMAX5B_006177	CP026249.1	complement(14467001..14473354)	61.9096	-2.08707	-4.24884	0.00473734	0.0542663	1	protein_coding	K03906//coagulation factor XIII B polypeptide;K04004//complement factor H	XP_035489405.1//complement factor H-like isoform X1 [Scophthalmus maximus];AWP04409.1//putative complement factor H-like isoform 2 [Scophthalmus maximus];XP_035489406.1//complement factor H-like isoform X2 [Scophthalmus maximus]
SMAX5B_011386	CP026250.1	6178210..6180573	2.76273	-2.09079	-4.25982	0.00168822	0.0247187	1	protein_coding	K10159//toll-like receptor 2	AWP05374.1//putative toll-like receptor 2 [Scophthalmus maximus]
SMAX5B_011748	CP026243.1	complement(18737760..18744753)	67.3484	-2.09314	-4.26677	0.000804246	0.0137926	1	protein_coding	K00497//steroid 11beta-monooxygenase [EC:1.14.15.4]	XP_022612265.1//cytochrome P450 11B, mitochondrial-like [Seriola dumerili]
SMAX5B_016624	CP026244.1	8310113..8321561	18.9569	-2.09512	-4.27262	4.27587e-05	0.00123483	0.811347	protein_coding	K14286//ethanolamine-phosphate phospho-lyase [EC:4.2.3.2]	AWO97705.1//putative ethanolamine-phosphate phospho-lyase isoform 2 [Scophthalmus maximus];AWO97704.1//putative ethanolamine-phosphate phospho-lyase [Scophthalmus maximus]
SMAX5B_001596	CP026263.1	complement(11974568..11997921)	31.5074	-2.10548	-4.30342	1.62397e-11	1.82829e-09	3.08148e-07	protein_coding	K14616//cubilin	AWP21017.1//putative cubilin-like [Scophthalmus maximus]
SMAX5B_016853	CP026257.1	10155598..10169043	2.2272	-2.10705	-4.3081	0.00309422	0.0392851	1	protein_coding	K03853//calpain-2 [EC:3.4.22.53]	AWP14209.1//putative calpain-2 catalytic subunit-like isoform 2 [Scophthalmus maximus];AWP14208.1//putative calpain-2 catalytic subunit-like [Scophthalmus maximus]
SMAX5B_002960	CP026258.1	361958..367380	6.90996	-2.10761	-4.30976	0.00393866	0.0474483	1	protein_coding	K20520//drebrin-like protein	AWP14811.1//putative drebrin-like protein A [Scophthalmus maximus];XP_019963247.1//PREDICTED: drebrin-like protein B [Paralichthys olivaceus]
SMAX5B_008600	CP026257.1	complement(17514848..17606326)	2.12581	-2.11021	-4.31755	0.00327839	0.0410007	1	protein_coding	K05849//solute carrier family 8 (sodium/calcium exchanger)	AWP14536.1//putative sodium/calcium exchanger 1-like [Scophthalmus maximus];XP_026215100.1//sodium/calcium exchanger 1-like isoform X16 [Anabas testudineus]
SMAX5B_017182	CP026245.1	complement(23433097..23440657)	6.81655	-2.11098	-4.31986	0.00303212	0.0386729	1	protein_coding	K03992//mannan-binding lectin serine protease 1 [EC:3.4.21.-]	XP_035477767.1//LOW QUALITY PROTEIN: mannan-binding lectin serine protease 1-like [Scophthalmus maximus];AWO99485.1//putative mannan-binding lectin serine protease 1 [Scophthalmus maximus]
SMAX5B_014321	CP026248.1	complement(16097581..16106225)	2.50158	-2.11999	-4.34692	0.00261332	0.0347632	1	protein_coding	K13073//polymeric immunoglobulin receptor	AWP03089.1//putative matrix-remodeling-associated protein 8-like [Scophthalmus maximus]
SMAX5B_002536	CP026243.1	complement(13454767..13466411)	2.23998	-2.12289	-4.35564	0.00298806	0.0383154	1	protein_coding	K06499//carcinoembryonic antigen-related cell adhesion molecule	AWO96138.1//Hypothetical protein SMAX5B_002536 [Scophthalmus maximus]
SMAX5B_012210	CP026243.1	complement(16455522..16457827)	828.363	-2.13608	-4.39565	1.24884e-07	7.22556e-06	0.00236968	protein_coding	K04524//apolipoprotein E;K08760//apolipoprotein A-IV	XP_035488445.1//apolipoprotein Eb [Scophthalmus maximus]
SMAX5B_001365	CP026252.1	complement(8912319..8938319)	44.2825	-2.14221	-4.41438	7.18369e-10	6.06253e-08	1.36311e-05	protein_coding	K06759//contactin 1	XP_018540096.1//PREDICTED: LOW QUALITY PROTEIN: contactin-1a-like [Lates calcarifer];AWP08163.1//putative contactin-1a-like [Scophthalmus maximus]
SMAX5B_003681	CP026258.1	8564002..8573590	10.5348	-2.14512	-4.42328	2.96576e-07	1.55945e-05	0.00562753	protein_coding	K23820	XP_018526847.1//PREDICTED: sushi domain-containing protein 2-like [Lates calcarifer];XP_019937770.1//PREDICTED: sushi domain-containing protein 2 [Paralichthys olivaceus]
SMAX5B_020724	CP026261.1	12230096..12232387	105.559	-2.14585	-4.42552	2.05606e-13	3.37052e-11	3.90137e-09	protein_coding	K17300//galectin-3-binding protein	XP_019957401.1//PREDICTED: galectin-3-binding protein [Paralichthys olivaceus];XP_035471031.1//galectin-3-binding protein A-like [Scophthalmus maximus]
SMAX5B_005936	CP026261.1	complement(4609891..4650001)	3.936	-2.14851	-4.43369	0.00293853	0.0378837	1	protein_coding	K19581//lipid phosphate phosphatase-related protein type 1/2/5	XP_035469937.1//phospholipid phosphatase-related protein type 2a isoform X2 [Scophthalmus maximus];KAF3854442.1//hypothetical protein F7725_022497 [Dissostichus mawsoni]
SMAX5B_018004	CP026257.1	complement(6612188..6623985)	3.69462	-2.14908	-4.43544	0.000728967	0.0127102	1	protein_coding	K02222//secreted frizzled-related protein 5	XP_035462639.1//secreted frizzled-related protein 5 [Scophthalmus maximus]
SMAX5B_007325	CP026250.1	14224930..14314196	9.33752	-2.15235	-4.44551	7.74342e-06	0.000283581	0.146931	protein_coding	K09661//mannosyl alpha-1,6-glycoprotein beta-1,6-N-acetyl-glucosaminyltransferase, isozyme B [EC:2.4.1.-]	XP_035493952.1//alpha-1,6-mannosylglycoprotein 6-beta-N-acetylglucosaminyltransferase B-like isoform X2 [Scophthalmus maximus];XP_035493953.1//alpha-1,6-mannosylglycoprotein 6-beta-N-acetylglucosaminyltransferase B-like isoform X3 [Scophthalmus maximus];XP_035493954.1//alpha-1,6-mannosylglycoprotein 6-beta-N-acetylglucosaminyltransferase B-like isoform X4 [Scophthalmus maximus]
SMAX5B_015239	CP026251.1	24996618..25045276	43.683	-2.15304	-4.44765	0.000390948	0.00764567	1	protein_coding	K16770//centriolin;K18626//trichohyalin;K03994//complement component 5;K00699//glucuronosyltransferase [EC:2.4.1.17]	XP_035495360.1//trichohyalin-like isoform X13 [Scophthalmus maximus];XP_035495357.1//centriolin-like isoform X10 [Scophthalmus maximus];EFN77814.1//hypothetical protein EAI_06930, partial [Harpegnathos saltator];XP_035495363.1//centriolin-like isoform X15 [Scophthalmus maximus];XP_018549111.1//PREDICTED: centriolin isoform X5 [Lates calcarifer];XP_035021179.1//UDP-glucuronosyltransferase 2A2-like…
SMAX5B_004689	CP026263.1	complement(963942..975749)	311.118	-2.18146	-4.53613	8.24975e-10	6.82891e-08	1.56539e-05	protein_coding	K06560//mannose receptor, C type	XP_018549156.1//PREDICTED: LOW QUALITY PROTEIN: macrophage mannose receptor 1 [Lates calcarifer];XP_035475240.1//macrophage mannose receptor 1 isoform X2 [Scophthalmus maximus]
SMAX5B_011410	CP026250.1	6427958..6448776	6.42099	-2.18657	-4.55221	0.00605702	0.0647153	1	protein_coding	K06532//prominin 1	XP_023265278.1//prominin-1 isoform X3 [Seriola lalandi dorsalis];XP_033480393.1//prominin 1 b isoform X9 [Epinephelus lanceolatus];KAF1395414.1//hypothetical protein PFLUV_G00011270 [Perca fluviatilis]
SMAX5B_011803	CP026243.1	complement(19859839..19863307)	4.04687	-2.19936	-4.59275	0.000621977	0.0111112	1	protein_coding	K13302//serum/glucocorticoid-regulated kinase 1 [EC:2.7.11.1]	AWO96626.1//putative serine/threonine-protein kinase Sgk1-like [Scophthalmus maximus]
SMAX5B_015327	CP026255.1	complement(20692206..20700024)	57.6216	-2.21022	-4.62745	2.04545e-14	3.93126e-12	3.88124e-10	protein_coding	K22644//voltage-gated hydrogen channel 1	XP_035505500.1//voltage-gated hydrogen channel 1 isoform X1 [Scophthalmus maximus];AWP12533.1//putative voltage-gated hydrogen channel 1 isoform 3 [Scophthalmus maximus];AWP12531.1//putative voltage-gated hydrogen channel 1 [Scophthalmus maximus]
SMAX5B_007640	CP026259.1	21286944..21314501	2.22866	-2.21034	-4.62785	0.00158987	0.0236936	1	protein_coding	K19326//nesprin-1	AWP16995.1//putative calmin [Scophthalmus maximus];XP_035466926.1//uncharacterized protein clmn [Scophthalmus maximus]
SMAX5B_020939	CP026261.1	complement(12116766..12133243)	5.25163	-2.21661	-4.648	1.65546e-05	0.000545976	0.314124	protein_coding	K00967//ethanolamine-phosphate cytidylyltransferase [EC:2.7.7.14]	AWP18966.1//putative ethanolamine-phosphate cytidylyltransferase-like [Scophthalmus maximus]
SMAX5B_011796	CP026243.1	21595313..21604716	29.7391	-2.22066	-4.66105	0.0016286	0.0241203	1	protein_coding	K00513//steroid 21-monooxygenase [EC:1.14.14.16];K06252//tenascin	AWO96762.1//putative tenascin-X [Scophthalmus maximus];XP_035496815.1//tenascin isoform X1 [Scophthalmus maximus]
SMAX5B_000375	CP026259.1	complement(11360698..11378516)	3.45146	-2.22972	-4.69043	0.00027876	0.00575449	1	protein_coding	K15288//solute carrier family 35, member F3/4	XP_035467128.1//solute carrier family 35 member F4 isoform X1 [Scophthalmus maximus];AWP16556.1//putative solute carrier family 35 member F4 [Scophthalmus maximus]
SMAX5B_009927	CP026252.1	15237291..15243124	76.5366	-2.23024	-4.69212	2.2587e-15	5.0357e-13	4.28589e-11	protein_coding	K08765//carnitine O-palmitoyltransferase 1, liver isoform [EC:2.3.1.21]	XP_022610328.1//carnitine O-palmitoyltransferase 1, liver isoform-like isoform X2 [Seriola dumerili]
SMAX5B_005815	CP026249.1	8706969..8709763	25.4307	-2.23038	-4.69256	2.74597e-05	0.000851863	0.521049	protein_coding	K23578//insulin-like growth factor-binding protein 1	XP_035489418.1//insulin-like growth factor-binding protein 1 [Scophthalmus maximus]
SMAX5B_008410	CP026245.1	complement(3691314..3723255)	7.14777	-2.2381	-4.71774	1.16888e-05	0.000400509	0.221795	protein_coding	K09610//endothelin-converting enzyme-like 1 [EC:3.4.24.-]	XP_035478244.1//endothelin-converting enzyme-like 1 isoform X2 [Scophthalmus maximus];XP_028276101.1//endothelin-converting enzyme-like 1 [Parambassis ranga]
SMAX5B_022112	CP026252.1	complement(1874578..1879403)	4.82451	-2.24265	-4.73267	0.00700931	0.0723027	1	protein_coding	K10955//mucin-2;K19012//lymphatic vessel endothelial hyaluronan receptor 1	AWP07869.1//putative lymphatic vessel endothelial hyaluronic acid receptor 1-like [Scophthalmus maximus];XP_029114867.1//mucin-2-like, partial [Scleropages formosus]
SMAX5B_006421	CP026249.1	3039224..3043861	4.72155	-2.24446	-4.73859	0.000299582	0.00616151	1	protein_coding	K04297//leukotriene B4 receptor 2	AWP03686.1//putative leukotriene B4 receptor 1-like [Scophthalmus maximus];XP_035489746.1//leukotriene B4 receptor 2b [Scophthalmus maximus]
SMAX5B_014515	CP026253.1	complement(11774211..11795034)	2.09193	-2.2452	-4.74104	0.00492674	0.0558131	1	protein_coding	K08181//MFS transporter, MCT family, solute carrier family 16 (monocarboxylic acid transporters), member 4	AWP09585.1//putative monocarboxylate transporter 5 [Scophthalmus maximus]
SMAX5B_012831	CP026252.1	18474494..18484148	1.86488	-2.2516	-4.7621	0.00965405	0.0903489	1	protein_coding	K15122//solute carrier family 41	XP_022610252.1//solute carrier family 41 member 2-like isoform X1 [Seriola dumerili]
SMAX5B_011439	CP026250.1	9643629..9646507	25.7495	-2.26257	-4.79846	0.00131349	0.0204116	1	protein_coding	K16627//superoxide dismutase, Cu-Zn family [EC:1.15.1.1]	AWP05545.1//putative extracellular superoxide dismutase [Scophthalmus maximus]
SMAX5B_018438	CP026256.1	4056515..4069224	175.129	-2.27595	-4.84318	1.10121e-12	1.54733e-10	2.08954e-08	protein_coding	K23577//insulin-like growth factor-binding protein 5	XP_035506977.1//insulin-like growth factor-binding protein 5 [Scophthalmus maximus]
SMAX5B_018991	CP026255.1	complement(2177021..2180117)	33.4649	-2.27885	-4.85292	0.00681931	0.0707356	1	protein_coding	K15049//endonuclease domain-containing 1 protein	XP_035506694.1//uncharacterized protein LOC118320020 isoform X1 [Scophthalmus maximus];KAF0040116.1//hypothetical protein F2P81_008351 [Scophthalmus maximus]
SMAX5B_005723	CP026251.1	complement(144757..157294)	29.4493	-2.27984	-4.85626	0.00051367	0.00955783	1	protein_coding	K00021//hydroxymethylglutaryl-CoA reductase (NADPH) [EC:1.1.1.34]	XP_022609114.1//3-hydroxy-3-methylglutaryl-coenzyme A reductase-like [Seriola dumerili];XP_035496234.1//3-hydroxy-3-methylglutaryl-CoA reductase a [Scophthalmus maximus]
SMAX5B_012661	CP026247.1	complement(15720501..15972123)	4.68606	-2.29545	-4.90908	6.26447e-09	4.47642e-07	0.000118868	protein_coding	K17495//CUB and sushi domain-containing protein	XP_022597400.1//CUB and sushi domain-containing protein 1-like [Seriola dumerili];XP_034433433.1//CUB and sushi domain-containing protein 1-like isoform X1 [Hippoglossus hippoglossus]
SMAX5B_021871	CP026263.1	complement(15069592..15070972)	31.6759	-2.29872	-4.9202	1.73582e-07	9.51628e-06	0.00329372	protein_coding	K07189//protein phosphatase 1 regulatory subunit 3A/B/C/D/E;K23490//cytochrome b5	AWP21112.1//putative protein phosphatase 1 regulatory subunit 3G, partial [Scophthalmus maximus]
SMAX5B_009991	CP026252.1	14406670..14427661	2.79737	-2.30428	-4.9392	0.000322576	0.00655382	1	protein_coding	K06840//semaphorin 3	XP_023259750.1//semaphorin-3D [Seriola lalandi dorsalis]
SMAX5B_018550	CP026256.1	complement(10218495..10233202)	1.20772	-2.32164	-4.999	0.000269965	0.0056006	1	protein_coding	K10955//mucin-2	XP_026151223.1//matrix-remodeling-associated protein 5-like isoform X1 [Mastacembelus armatus]
SMAX5B_004317	CP026246.1	complement(12061540..12078584)	5.80443	-2.34505	-5.08079	0.000250898	0.00529038	1	protein_coding	K19895//GDNF family receptor alpha 1	AWP00123.1//putative GDNF family receptor alpha-4-like [Scophthalmus maximus]
SMAX5B_003241	CP026247.1	complement(27151185..27172769)	1.30223	-2.34563	-5.08284	0.00534171	0.0588398	1	protein_coding	K04512//dishevelled associated activator of morphogenesis	AWP02071.1//putative disheveled-associated activator of morphogenesis 1-like [Scophthalmus maximus]
SMAX5B_019760	CP026244.1	97534..105828	3.43768	-2.3534	-5.11026	0.00851662	0.0827464	1	protein_coding	K04297//leukotriene B4 receptor 2;K04296//leukotriene B4 receptor 1	KAF0028831.1//hypothetical protein F2P81_017936 [Scophthalmus maximus];AWO97198.1//putative leukotriene B4 receptor 1-like [Scophthalmus maximus]
SMAX5B_010982	CP026251.1	complement(8878714..8886214)	569.314	-2.37195	-5.1764	1.31064e-11	1.49083e-09	2.48693e-07	protein_coding	K01487//guanine deaminase [EC:3.5.4.3]	XP_035022265.1//guanine deaminase [Hippoglossus stenolepis];XP_035496182.1//guanine deaminase [Scophthalmus maximus]
SMAX5B_009501	CP026252.1	23940099..23948108	3.32334	-2.38301	-5.21622	0.00140399	0.0214694	1	protein_coding	K08397//relaxin family peptide receptor 3	XP_030587711.1//relaxin-3 receptor 1-like [Archocentrus centrarchus];AWP09016.1//putative relaxin-3 receptor 1-like [Scophthalmus maximus]
SMAX5B_012628	CP026247.1	complement(10771713..10802072)	5.62975	-2.38966	-5.24035	0.000369918	0.00734609	1	protein_coding	K12568//myosin-binding protein C, cardiac-type	XP_023280137.1//myosin-binding protein C, cardiac-type isoform X1 [Seriola lalandi dorsalis];XP_034428522.1//myosin-binding protein C, cardiac-type isoform X3 [Hippoglossus hippoglossus];XP_023280139.1//myosin-binding protein C, cardiac-type isoform X3 [Seriola lalandi dorsalis];XP_033966270.1//myosin-binding protein C, cardiac-type isoform X6 [Pseudochaenichthys georgianus];XP_033966254.1//myosi…
SMAX5B_021250	CP026251.1	complement(4621420..4623573)	24.9561	-2.3903	-5.24267	0.000100393	0.00250923	1	protein_coding	K19867//LIM domain-binding protein 3;K21853//dedicator of cytokinesis protein 9/10/11	XP_035496957.1//Golgi-associated plant pathogenesis-related protein 1 [Scophthalmus maximus]
SMAX5B_006736	CP026256.1	complement(3427127..3432106)	60.6799	-2.41002	-5.31483	6.01776e-13	9.06514e-11	1.14187e-08	protein_coding	K00699//glucuronosyltransferase [EC:2.4.1.17]	XP_022597085.1//UDP-glucuronosyltransferase 1-1 [Seriola dumerili]
SMAX5B_005143	CP026248.1	complement(7550051..7566469)	3.17965	-2.4262	-5.37476	0.00725157	0.0741612	1	protein_coding	K17620//eyes absent homolog 2 [EC:3.1.3.48]	XP_035487852.1//eyes absent homolog 2 [Scophthalmus maximus]
SMAX5B_015543	CP026264.1	7761200..7775839	4.69478	-2.43398	-5.40383	6.07995e-05	0.00165471	1	protein_coding	K09275//transcription factor CP2 and related proteins	XP_035476476.1//grainyhead-like transcription factor 2b isoform X1 [Scophthalmus maximus]
SMAX5B_000935	CP026247.1	complement(1893169..1895110)	20.0803	-2.4506	-5.46643	0.0036376	0.0446909	1	protein_coding	K06560//mannose receptor, C type;K17513//C-type lectin superfamily 17 member A	AWP01117.1//putative C-type lectin galactose-binding [Scophthalmus maximus]
SMAX5B_021652	CP026256.1	complement(1493397..1499835)	61.5914	-2.46268	-5.51241	3.36373e-23	1.44218e-20	6.38268e-19	protein_coding	K14685//solute carrier family 40 (iron-regulated transporter), member 1	AWP12693.1//putative solute carrier family 40 member 1 [Scophthalmus maximus]
SMAX5B_019842	CP026245.1	8200729..8203035	21.5412	-2.48131	-5.58405	0.00384223	0.0464205	1	protein_coding	K10522//diablo	XP_035479833.1//diablo homolog, mitochondrial-like isoform X1 [Scophthalmus maximus];XP_035479834.1//diablo homolog, mitochondrial-like isoform X2 [Scophthalmus maximus]
SMAX5B_015786	CP026264.1	complement(9224515..9233076)	2.39738	-2.49196	-5.62541	0.00951463	0.0893787	1	protein_coding	K10137//zinc finger, matrin type 3;K06467//CD22 antigen;K04224//tachykinin receptor 3;K23225//DNA-binding protein SATB1	XP_035002966.1//receptor-type tyrosine-protein phosphatase zeta isoform X2 [Hippoglossus stenolepis];XP_035476697.1//LOW QUALITY PROTEIN: zinc finger protein 385D-like [Scophthalmus maximus];AWP21701.1//putative zinc finger protein 385D-like [Scophthalmus maximus];XP_035002967.1//receptor-type tyrosine-protein phosphatase zeta isoform X3 [Hippoglossus stenolepis]
SMAX5B_020375	CP026260.1	complement(10124084..10145196)	1.65649	-2.51304	-5.70823	0.00483191	0.0549621	1	protein_coding	K06103//calcium/calmodulin-dependent serine protein kinase [EC:2.7.11.1]	XP_035514550.1//MAGUK p55 subfamily member 2b isoform X1 [Morone saxatilis];XP_035469312.1//MAGUK p55 subfamily member 2b isoform X1 [Scophthalmus maximus]
SMAX5B_011847	CP026243.1	complement(26105677..26112361)	16.799	-2.51504	-5.71614	4.8122e-11	4.93649e-09	9.13114e-07	protein_coding	K06491//neural cell adhesion molecule	XP_034468249.1//neural cell adhesion molecule 1-like isoform X1 [Hippoglossus hippoglossus];XP_035494261.1//neural cell adhesion molecule 1 isoform X2 [Scophthalmus maximus]
SMAX5B_012376	CP026246.1	4873378..4879507	6.48277	-2.5247	-5.75453	2.04762e-05	0.000654653	0.388537	protein_coding	K05740//diaphanous 1;K05741//diaphanous 2	AWO99770.1//putative FH2 domain-containing protein 1-like [Scophthalmus maximus]
SMAX5B_019070	CP026255.1	15266562..15271397	16.4211	-2.58326	-5.99293	1.96461e-08	1.31401e-06	0.000372784	protein_coding	K14752//docking protein 1;K20234//docking protein 2	AWP12292.1//putative docking protein 3 [Scophthalmus maximus]
SMAX5B_014762	CP026253.1	complement(20118280..20119178)	18.3765	-2.58755	-6.01077	0.00061734	0.0110638	1	protein_coding	K13221//methylosome protein 50	XP_035500341.1//G0/G1 switch protein 2 [Scophthalmus maximus]
SMAX5B_008457	CP026245.1	4130219..4133608	9.756	-2.58888	-6.01631	1.29035e-06	5.72306e-05	0.0244844	protein_coding	K19607//X-linked retinitis pigmentosa GTPase regulator	KOF96884.1//hypothetical protein OCBIM_22033038mg [Octopus bimaculoides]
SMAX5B_008896	CP026255.1	complement(13669520..13672738)	9.3538	-2.58933	-6.01818	0.0051622	0.0575448	1	protein_coding	NA	AWP12188.1//Hypothetical protein SMAX5B_008896 [Scophthalmus maximus]
SMAX5B_020969	CP026261.1	complement(13165838..13171461)	19.9045	-2.59342	-6.03526	4.86641e-09	3.52257e-07	9.23402e-05	protein_coding	K10258//very-long-chain enoyl-CoA reductase [EC:1.3.1.93]	XP_018560146.1//PREDICTED: LOW QUALITY PROTEIN: very-long-chain enoyl-CoA reductase-like [Lates calcarifer]
SMAX5B_018583	CP026256.1	complement(9480106..9609670)	1.85053	-2.59483	-6.04117	0.00017202	0.0039402	1	protein_coding	K05085//receptor tyrosine-protein kinase erbB-4 [EC:2.7.10.1]	XP_022597072.1//receptor tyrosine-protein kinase erbB-4-like [Seriola dumerili];AWP12960.1//v-erb-a erythroblastic leukemia viral oncogene -like 4-like [Scophthalmus maximus];XP_035460041.1//receptor tyrosine-protein kinase erbB-4-like isoform X2 [Scophthalmus maximus]
SMAX5B_016842	CP026257.1	10928654..10946578	17.2646	-2.6257	-6.17182	1.26034e-07	7.26697e-06	0.0023915	protein_coding	K21125//mucin-5AC;K23574//cochlin	XP_035029172.1//vitrin isoform X2 [Hippoglossus stenolepis];XP_027644439.1//vitrin isoform X3 [Falco peregrinus];XP_029087981.1//vitrin isoform X1 [Monodon monoceros]
SMAX5B_001847	CP026250.1	18091005..18095427	43.0462	-2.626	-6.17312	3.71092e-05	0.00110018	0.704148	protein_coding	K07604//type I keratin, acidic	AWP06130.1//putative keratin type I cytoskeletal 19-like isoform 2 [Scophthalmus maximus];AWP06131.1//putative keratin type I cytoskeletal 19-like isoform 3 [Scophthalmus maximus];AWP06129.1//putative keratin type I cytoskeletal 19-like [Scophthalmus maximus]
SMAX5B_003232	CP026247.1	27023155..27082294	1.47132	-2.62628	-6.17433	0.00357525	0.0441194	1	protein_coding	K04322//cysteinyl leukotriene receptor 1;K10955//mucin-2;K22017//mucin-4;K08631//a disintegrin and metalloproteinase with thrombospondin motifs 17 [EC:3.4.24.-]	AWP02067.1//putative UPF0258 protein KIAA1024 -like [Scophthalmus maximus];KAF0043660.1//hypothetical protein F2P81_004997 [Scophthalmus maximus]
SMAX5B_021673	CP026256.1	complement(1837217..1839072)	10.9232	-2.63596	-6.2159	0.00126901	0.0198471	1	protein_coding	K22235//melanophilin	AWP12721.1//putative melanophilin-like [Scophthalmus maximus]
SMAX5B_021138	CP026247.1	complement(1000762..1011280)	16.8616	-2.64635	-6.26083	0.00672915	0.0700337	1	protein_coding	K00029//malate dehydrogenase (oxaloacetate-decarboxylating)(NADP+) [EC:1.1.1.40];K13912//deleted in malignant brain tumors 1 protein	XP_035483456.1//uncharacterized protein LOC118301896 isoform X1 [Scophthalmus maximus]
SMAX5B_009838	CP026252.1	14223016..14230208	2.44807	-2.65045	-6.27865	0.000188588	0.00421013	1	protein_coding	K16505//cadherin-related family member 5	AWP08546.1//putative cadherin-related family member 5-like [Scophthalmus maximus]
SMAX5B_018645	CP026256.1	complement(14298460..14299617)	5.36739	-2.65436	-6.29567	0.000164745	0.00378914	1	protein_coding	K07614//gap junction alpha-5 protein	XP_035507153.1//gap junction protein, alpha 5a [Scophthalmus maximus]
SMAX5B_011659	CP026252.1	complement(3321353..3374872)	4.88785	-2.66574	-6.34553	4.41512e-07	2.20374e-05	0.00837769	protein_coding	K01197//hyaluronoglucosaminidase [EC:3.2.1.35]	AWP07919.1//Hyaluronidase [Scophthalmus maximus]
SMAX5B_006051	CP026249.1	5292246..5296146	2.25924	-2.67213	-6.37371	0.00190847	0.0273919	1	protein_coding	K05614//solute carrier family 1 (glial high affinity glutamate transporter), member 3	AWP03798.1//putative excitatory amino acid transporter 1-like [Scophthalmus maximus]
SMAX5B_005337	CP026247.1	complement(2084732..2092109)	307.063	-2.69194	-6.4618	0.00818485	0.0808746	1	protein_coding	K18543//choriolysin H [EC:3.4.24.67];K13046//tolkin [EC:3.4.24.-];K08076//astacin [EC:3.4.24.21]	AWP01133.1//putative low choriolytic enzyme-like isoform 2 [Scophthalmus maximus]
SMAX5B_006521	CP026249.1	16164052..16166055	4.24605	-2.70521	-6.52152	0.00643549	0.0678058	1	protein_coding	K23026//LIM domain and actin-binding protein 1;K23573//dentin sialophosphoprotein	AWP04542.1//Hypothetical protein SMAX5B_006521 [Scophthalmus maximus];XP_035025392.1//uncharacterized protein LOC118117344 [Hippoglossus stenolepis]
SMAX5B_018594	CP026256.1	8340648..8346401	1.87205	-2.70745	-6.53165	0.0049714	0.0561895	1	protein_coding	K10321//F-box protein 47	XP_035459513.1//F-box only protein 47-like isoform X2 [Scophthalmus maximus]
SMAX5B_000758	CP026245.1	complement(21075546..21080425)	88.1282	-2.70815	-6.53483	0.00959666	0.089977	1	protein_coding	K05970//sialate O-acetylesterase [EC:3.1.1.53]	AWO99382.1//putative sialate O-acetylesterase [Scophthalmus maximus];AWO99383.1//putative sialate O-acetylesterase isoform 2 [Scophthalmus maximus]
SMAX5B_002052	CP026263.1	4686604..4694654	70.9498	-2.71766	-6.57805	4.70918e-06	0.00018001	0.0893567	protein_coding	K14360//organic solute transporter subunit alpha	AWP20744.1//putative organic solute transporter subunit alpha-like [Scophthalmus maximus];AWP20745.1//putative organic solute transporter subunit alpha-like isoform 2 [Scophthalmus maximus];KAF1372939.1//hypothetical protein PFLUV_G00255160 [Perca fluviatilis]
SMAX5B_020554	CP026260.1	complement(20096062..20097276)	32.5035	-2.73722	-6.66784	0.00639396	0.0674338	1	protein_coding	NA	AWP18137.1//putative cytolysin RTX-A-like [Scophthalmus maximus]
SMAX5B_018064	CP026257.1	4826082..4829362	44.944	-2.73885	-6.67537	1.58775e-13	2.65488e-11	3.01276e-09	protein_coding	K20395//CO300B/D/F antigen;K15040//voltage-dependent anion channel protein 2;K13073//polymeric immunoglobulin receptor	AWP13908.1//putative CMRF35-like molecule 1 [Scophthalmus maximus]
SMAX5B_001266	CP026249.1	20289805..20295202	3.36497	-2.7529	-6.74069	0.000137772	0.00324921	1	protein_coding	K16519//A-kinase anchor protein 2	AWP04717.1//putative palmdelphin-like [Scophthalmus maximus]
SMAX5B_002671	CP026253.1	complement(3781443..3783072)	2.91809	-2.75533	-6.75206	0.00290811	0.0375784	1	protein_coding	K03334//L-amino-acid oxidase [EC:1.4.3.2]	KAF0036643.1//hypothetical protein F2P81_011955 [Scophthalmus maximus]
SMAX5B_008116	CP026262.1	complement(8480443..8495871)	105.228	-2.75708	-6.76026	1.35853e-05	0.000457985	0.257782	protein_coding	NA	XP_035473667.1//liver-enriched gene 1, tandem duplicate 1 isoform X1 [Scophthalmus maximus]
SMAX5B_015538	CP026264.1	7727105..7729503	1364.05	-2.76784	-6.81087	0.00842619	0.0824908	1	protein_coding	K08758//apolipoprotein A-II	XP_035476200.1//type-4 ice-structuring protein-like [Scophthalmus maximus]
SMAX5B_001470	CP026244.1	complement(5695103..5699823)	69.8604	-2.78228	-6.87938	0.000368766	0.00733192	1	protein_coding	K03908//protein S;K05464//growth arrest-specific 6	AWO97596.1//Sex hormone binding globulin [Scophthalmus maximus]
SMAX5B_015634	CP026264.1	6074398..6075639	29.2371	-2.79464	-6.93859	0.00973354	0.0908228	1	protein_coding	K23765	AWP21510.1//putative protein S100-A13-like [Scophthalmus maximus]
SMAX5B_016219	CP026249.1	complement(24069770..24076692)	15.0512	-2.81022	-7.01391	1.61571e-07	8.96331e-06	0.00306582	protein_coding	K11651//SWI/SNF-related matrix-associated actin-dependent regulator of chromatin subfamily E, member 1	XP_035490592.1//transmembrane protein 54b isoform X1 [Scophthalmus maximus];AWP04853.1//putative transmembrane protein 54-like [Scophthalmus maximus]
SMAX5B_015954	CP026261.1	complement(18495151..18497193)	6.28909	-2.81973	-7.06032	0.00113168	0.0181949	1	protein_coding	K16143//C-reactive protein	AWP19398.1//putative pentraxin fusion protein-like [Scophthalmus maximus]
SMAX5B_005368	CP026257.1	complement(3058746..3065108)	94.8225	-2.82406	-7.08153	0.000359728	0.0071864	1	protein_coding	K09821//angiotensinogen	AWP13831.1//Liver angiotensinogen [Scophthalmus maximus];XP_035462225.1//angiotensinogen [Scophthalmus maximus]
SMAX5B_008486	CP026257.1	complement(17759308..17764612)	3.00482	-2.82837	-7.10271	0.00571004	0.0619181	1	protein_coding	K19657//nephrocystin-1	XP_033094698.1//myelin and lymphocyte protein isoform X1 [Trachypithecus francoisi]
SMAX5B_016361	CP026254.1	complement(19236511..19251566)	6.38079	-2.82955	-7.10853	0.00577242	0.0622312	1	protein_coding	K07597//desmoglein 2	XP_035504225.1//desmoglein-2.1 isoform X1 [Scophthalmus maximus];AWP11356.1//putative desmoglein-2-like [Scophthalmus maximus];XP_035504226.1//desmoglein-2.1 isoform X2 [Scophthalmus maximus]
SMAX5B_006790	CP026246.1	6541005..6546221	76.8162	-2.83698	-7.14523	0.00966842	0.090417	1	protein_coding	K01321//coagulation factor IX (Christmas factor) [EC:3.4.21.22]	XP_031136604.1//coagulation factor IXb [Sander lucioperca];AWO99907.1//putative coagulation factor IX-like [Scophthalmus maximus]
SMAX5B_020592	CP026260.1	complement(20097590..20098695)	30.3569	-2.84485	-7.18432	0.00576542	0.0622309	1	protein_coding	K10955//mucin-2;K08464//adhesion G-protein coupled receptor G7	TKS89424.1//DELTA-sagatoxin-Srs1a [Collichthys lucidus]
SMAX5B_022225	CP026254.1	5045283..5052377	29.0114	-2.85134	-7.21671	3.32149e-05	0.00100283	0.630253	protein_coding	K23409//alpha-2-HS-glycoprotein	AWP10632.1//Hypothetical protein SMAX5B_022225 [Scophthalmus maximus]
SMAX5B_017861	CP026254.1	complement(4281052..4287343)	399.026	-2.85457	-7.23289	0.00724108	0.0740992	1	protein_coding	K03898//kininogen	XP_035503140.1//kininogen-1 [Scophthalmus maximus]
SMAX5B_020281	CP026260.1	8151292..8164972	1.62508	-2.86724	-7.29667	0.000130997	0.0031381	1	protein_coding	K02374//tyrosine-protein phosphatase non-receptor type 13	XP_035469663.1//FERM and PDZ domain-containing protein 2 isoform X1 [Scophthalmus maximus];AWP17333.1//putative FERM and PDZ domain-containing protein 2 [Scophthalmus maximus]
SMAX5B_021398	CP026244.1	complement(10400165..10402637)	133.173	-2.87706	-7.34649	0.00480381	0.0547543	1	protein_coding	K16628//collagen, type VII, alpha;K19511//peroxidase [EC:1.11.1.7]	XP_035476080.1//fish-egg lectin-like [Scophthalmus maximus]
SMAX5B_022447	CP026254.1	complement(7054115..7061927)	44.0685	-2.8815	-7.36916	8.31036e-05	0.0021411	1	protein_coding	K06251//vitronectin	AWP10700.1//putative proteoglycan 4 [Scophthalmus maximus]
SMAX5B_015344	CP026255.1	20985490..20999753	9.1582	-2.90447	-7.48742	1.06757e-07	6.3077e-06	0.00202571	protein_coding	K01637//isocitrate lyase [EC:4.1.3.1];K01638//malate synthase [EC:2.3.3.9]	XP_035505456.1//malate synthase-like isoform X2 [Scophthalmus maximus];XP_035505455.1//malate synthase-like isoform X1 [Scophthalmus maximus]
SMAX5B_003011	CP026258.1	complement(1976776..1983948)	46.3751	-2.91254	-7.52943	0.00114356	0.0183507	1	protein_coding	K03996//complement component 7	XP_035463067.1//complement component C7 [Scophthalmus maximus];XP_018558012.1//PREDICTED: LOW QUALITY PROTEIN: complement component C7-like [Lates calcarifer]
SMAX5B_014723	CP026253.1	complement(20066239..20076705)	23.1258	-2.91696	-7.55252	5.37582e-12	6.42065e-10	1.02006e-07	protein_coding	K00699//glucuronosyltransferase [EC:2.4.1.17]	XP_019963666.1//PREDICTED: UDP-glucuronosyltransferase 2B20-like isoform X1 [Paralichthys olivaceus];XP_035501906.1//UDP-glucuronosyltransferase 2B20-like [Scophthalmus maximus]
SMAX5B_008390	CP026245.1	3310036..3344079	339.625	-2.93788	-7.66283	0.00450919	0.0525056	1	protein_coding	K22449//tubulin-specific chaperone cofactor E-like protein;K23593//alpha-2-macroglobulin-like protein	XP_018548787.1//PREDICTED: LOW QUALITY PROTEIN: alpha-2-macroglobulin-like [Lates calcarifer];XP_026154857.1//tubulin-specific chaperone cofactor E-like protein isoform X1 [Mastacembelus armatus]
SMAX5B_003123	CP026264.1	998396..1007978	296.025	-2.94052	-7.67687	0.00296608	0.0381185	1	protein_coding	K23573//dentin sialophosphoprotein	XP_035477057.1//clumping factor B-like isoform X1 [Scophthalmus maximus];XP_035477059.1//surface protein-like isoform X3 [Scophthalmus maximus];AWP21186.1//Hypothetical protein SMAX5B_003123 [Scophthalmus maximus];AWP21187.1//Hypothetical protein SMAX5B_003123 [Scophthalmus maximus];XP_035477065.1//clumping factor B-like isoform X9 [Scophthalmus maximus]
SMAX5B_020010	CP026247.1	28312202..28318062	3.88471	-2.94191	-7.68426	0.0006959	0.0122357	1	protein_coding	K19876//metalloreductase STEAP4 [EC:1.16.1.-];K11262//acetyl-CoA carboxylase / biotin carboxylase 1 [EC:6.4.1.2 6.3.4.14 2.1.3.15];K04613//vomeronasal 2 receptor;K12006//tripartite motif-containing protein 16	TKS70413.1//Cortexin-2 [Collichthys lucidus];CBN81175.1//Pol polyprotein [Dicentrarchus labrax]
SMAX5B_013672	CP026243.1	complement(30471208..30479024)	14.2101	-2.94272	-7.68861	0.000602903	0.0108755	1	protein_coding	K08660//cytosolic nonspecific dipeptidase [EC:3.4.13.18]	XP_035485287.1//cytosolic non-specific dipeptidase [Scophthalmus maximus]
SMAX5B_022746	CP026247.1	23925474..24000519	0.610253	-2.95883	-7.77493	0.00356603	0.0440381	1	protein_coding	K08632//a disintegrin and metalloproteinase with thrombospondin motifs 18 [EC:3.4.24.-]	AWP01998.1//putative disintegrin and metalloproteinase with thrombospondin motifs 18 [Scophthalmus maximus]
SMAX5B_020213	CP026260.1	12259860..12288421	48.1509	-2.99118	-7.95121	0.00605214	0.0647045	1	protein_coding	K18273//alpha-tectorin	AWP17688.1//Alpha-tectorin [Scophthalmus maximus]
SMAX5B_002105	CP026243.1	280357..283797	38.8667	-3.01006	-8.05598	0.00552848	0.0602752	1	protein_coding	K01344//protein C (activated) [EC:3.4.21.69];K01320//coagulation factor VII [EC:3.4.21.21]	XP_035485866.1//LOW QUALITY PROTEIN: uncharacterized protein LOC118308402 [Scophthalmus maximus]
SMAX5B_000668	CP026245.1	19233301..19235071	2.2771	-3.01251	-8.06966	0.00694272	0.0717486	1	protein_coding	K09405//forkhead box protein L	XP_035479674.1//forkhead box protein L2a [Scophthalmus maximus]
SMAX5B_015890	CP026264.1	complement(5481705..5484029)	48.9472	-3.01511	-8.08421	0.00398309	0.0478457	1	protein_coding	K04524//apolipoprotein E	AWP21466.1//putative apolipoprotein Eb-like [Scophthalmus maximus]
SMAX5B_021247	CP026251.1	4053247..4074305	2.25391	-3.03301	-8.18517	0.0047596	0.0543987	1	protein_coding	K12325//atrial natriuretic peptide clearance receptor	XP_035496865.1//atrial natriuretic peptide receptor 3 [Scophthalmus maximus]
SMAX5B_004255	CP026246.1	complement(12968259..12969726)	3.16428	-3.03967	-8.22304	0.00216634	0.0300609	1	protein_coding	K06514//Thy-1 cell surface antigen	AWP00176.1//Thy-1 [Scophthalmus maximus];RVE63715.1//hypothetical protein OJAV_G00139140 [Oryzias javanicus]
SMAX5B_012723	CP026247.1	9623727..9690692	4.07351	-3.05426	-8.30664	0.000367323	0.00731191	1	protein_coding	K08111//glypican 5	XP_035484612.1//glypican-5a isoform X2 [Scophthalmus maximus];AWP01427.1//putative glypican-5-like [Scophthalmus maximus]
SMAX5B_000703	CP026245.1	20911813..20913114	120.539	-3.05691	-8.32189	0.00278974	0.0364148	1	protein_coding	K06846//lymphocyte antigen 6 complex locus protein D/E/G6/H	XP_035478792.1//lymphocyte antigen 6D [Scophthalmus maximus];AWO99369.1//putative lymphocyte antigen 6D-like [Scophthalmus maximus];KAF0030782.1//hypothetical protein F2P81_017513 [Scophthalmus maximus]
SMAX5B_002688	CP026253.1	4050880..4055986	91.6496	-3.06202	-8.3514	6.91831e-06	0.000256499	0.131275	protein_coding	K07605//type II keratin, basic	XP_034731816.1//keratin, type II cytoskeletal 8 isoform X6 [Etheostoma cragini];XP_026224390.1//keratin, type II cytoskeletal 5 [Anabas testudineus]
SMAX5B_020483	CP026254.1	complement(2623494..2630323)	280.743	-3.06872	-8.39031	0.00782654	0.0782188	1	protein_coding	K10955//mucin-2;K23411//fetuin-B;K23410//histidine-rich glycoprotein	AWP10533.1//Fetuin B [Scophthalmus maximus];XP_026028044.1//mucin-2 [Astatotilapia calliptera]
SMAX5B_013866	CP026258.1	15474883..15482516	4.05948	-3.07868	-8.44842	0.00420198	0.0499725	1	protein_coding	K19194//AT-rich interactive domain-containing protein 4A	AWP15584.1//ARID domain containing protein [Scophthalmus maximus];XP_035464640.1//AT-rich interaction domain 6 [Scophthalmus maximus]
SMAX5B_007320	CP026250.1	complement(10795420..10802328)	95.8745	-3.07931	-8.45208	0.00041673	0.00804635	1	protein_coding	K04001//C1 inhibitor	AWP05608.1//C1 inhibitor [Scophthalmus maximus];XP_035493307.1//plasma protease C1 inhibitor [Scophthalmus maximus]
SMAX5B_010640	CP026244.1	21294615..21308642	8.1448	-3.09104	-8.52111	0.00102479	0.0167996	1	protein_coding	K05459//insulin-like growth factor 1	XP_033470072.1//insulin-like growth factor I isoform X2 [Epinephelus lanceolatus];XP_035474340.1//insulin-like growth factor I isoform X1 [Scophthalmus maximus]
SMAX5B_022463	CP026254.1	6538679..6543110	10.7387	-3.09824	-8.56374	0.00575552	0.0621693	1	protein_coding	NA	XP_035504236.1//cornifelin homolog B-like [Scophthalmus maximus]
SMAX5B_017556	CP026243.1	6020893..6063607	6.59459	-3.11964	-8.69171	2.13689e-06	8.86625e-05	0.0405475	protein_coding	K18273//alpha-tectorin	AWO95813.1//putative zonadhesin-like isoform 2 [Scophthalmus maximus]
SMAX5B_018752	CP026251.1	958314..961741	8.47153	-3.13231	-8.76836	0.0061744	0.0657174	1	protein_coding	K07818//perforin 1	AWP06481.1//C2 domain protein isoform 2 [Scophthalmus maximus]
SMAX5B_011564	CP026250.1	complement(4731102..4736098)	108.033	-3.1344	-8.78112	0.00702844	0.0724553	1	protein_coding	K07818//perforin 1	AWP05307.1//putative perforin-1-like isoform 2 [Scophthalmus maximus];XP_035491865.1//perforin-1-like [Scophthalmus maximus]
SMAX5B_021744	CP026249.1	17377429..17381389	74.0602	-3.14031	-8.81713	8.28015e-05	0.00213991	1	protein_coding	K11455//chromobox protein 8;K08026//one cut domain, family member 1, hepatocyte nuclear factor 6;K14443//protein Tob/BTG;K09215//odd-skipped	AWP04602.1//putative selenoprotein Pb-like [Scophthalmus maximus];XP_035488986.1//selenoprotein Pb [Scophthalmus maximus]
SMAX5B_007894	CP026254.1	22209753..22215695	25.7669	-3.14496	-8.84559	0.000621564	0.0111112	1	protein_coding	K05768//gelsolin	XP_022615096.1//adseverin-like [Seriola dumerili]
SMAX5B_012433	CP026247.1	13381067..13388683	5.4179	-3.14783	-8.86322	0.00168181	0.024683	1	protein_coding	K08542//hepatocyte nuclear factor 4-beta	AWP01588.1//putative hepatocyte nuclear factor 4-beta-like [Scophthalmus maximus]
SMAX5B_021643	CP026256.1	complement(1827298..1834589)	15.3584	-3.14825	-8.86577	6.10225e-05	0.00165471	1	protein_coding	K22235//melanophilin	AWP12720.1//putative melanophilin-like [Scophthalmus maximus]
SMAX5B_020255	CP026260.1	complement(7188159..7191810)	1.99474	-3.15613	-8.91435	0.00769105	0.0773314	1	protein_coding	K22156//protein Jade-3;K01027//3-oxoacid CoA-transferase [EC:2.8.3.5]	XP_035469749.1//PI-PLC X domain-containing protein 1-like [Scophthalmus maximus];KAF0025109.1//hypothetical protein F2P81_021990 [Scophthalmus maximus]
SMAX5B_017315	CP026260.1	12897669..12900355	571.291	-3.16604	-8.97582	9.13075e-07	4.19437e-05	0.0173256	protein_coding	K18271//retinol-binding protein 4	AWP17714.1//RBP4 [Scophthalmus maximus];XP_035468897.1//retinol-binding protein 4 [Scophthalmus maximus]
SMAX5B_014196	CP026248.1	complement(21397679..21400821)	3.20246	-3.17114	-9.00756	0.000874133	0.0147194	1	protein_coding	NA	XP_035488143.1//2-epi-5-epi-valiolone synthase [Scophthalmus maximus]
SMAX5B_003647	CP026243.1	complement(15437758..15441657)	1.99689	-3.17472	-9.02998	0.00146462	0.0221828	1	protein_coding	K06771//myelin associated glycoprotein;K06549//sialic acid binding Ig-like lectin 5/14	AWO96245.1//putative sialoadhesin-like [Scophthalmus maximus];XP_022620062.1//sialoadhesin-like isoform X1 [Seriola dumerili]
SMAX5B_010348	CP026251.1	19181914..19190006	1.59339	-3.18023	-9.0645	0.00698707	0.0721177	1	protein_coding	K09375//LIM homeobox protein 6/8	AWP07459.1//putative LIM/homeobox protein Lhx6-like [Scophthalmus maximus]
SMAX5B_009591	CP026260.1	complement(3409325..3415796)	805.861	-3.18478	-9.09314	3.21626e-12	3.98364e-10	6.10286e-08	protein_coding	K01092//myo-inositol-1(or 4)-monophosphatase [EC:3.1.3.25]	XP_035467875.1//inositol monophosphatase 1-like isoform X1 [Scophthalmus maximus];XP_035467876.1//inositol monophosphatase 1-like isoform X2 [Scophthalmus maximus];AWP17140.1//Inositol monophosphatase 1 [Scophthalmus maximus];AWP17141.1//Inositol monophosphatase 1 isoform 2 [Scophthalmus maximus]
SMAX5B_006435	CP026249.1	15236322..15267566	39.6131	-3.21119	-9.26111	0.000159494	0.00368865	1	protein_coding	K20054//disabled homolog 1;K03998//complement component 8 subunit beta	XP_023277714.1//disabled homolog 1 isoform X2 [Seriola lalandi dorsalis];AWP04474.1//Complement component C8 beta chain [Scophthalmus maximus];XP_035489271.1//LOW QUALITY PROTEIN: complement component C8 beta chain-like [Scophthalmus maximus];KAF0047267.1//hypothetical protein F2P81_000900 [Scophthalmus maximus]
SMAX5B_009387	CP026255.1	complement(8187104..8239811)	4.20102	-3.23755	-9.43192	8.0443e-06	0.000293048	0.152641	protein_coding	K16499//protocadherin delta 2	XP_023253834.1//protocadherin-19 isoform X1 [Seriola lalandi dorsalis];XP_033488925.1//protocadherin-19 isoform X1 [Epinephelus lanceolatus];AWP11828.1//putative protocadherin-19 [Scophthalmus maximus]
SMAX5B_019990	CP026245.1	complement(7603211..7604604)	16.7718	-3.2694	-9.64244	0.00103237	0.0168742	1	protein_coding	K06087//claudin	KAF0030093.1//hypothetical protein F2P81_016824 [Scophthalmus maximus]
SMAX5B_002478	CP026255.1	11935439..11942536	82.3332	-3.27976	-9.71198	6.55525e-33	5.21954e-30	1.24386e-28	protein_coding	K08230//MFS transporter, LAT3 family, solute carrier family 43, member 3	XP_035506023.1//solute carrier family 43 member 3b isoform X1 [Scophthalmus maximus];XP_035506025.1//solute carrier family 43 member 3b isoform X2 [Scophthalmus maximus];AWP12047.1//putative solute carrier family 43 member 3 [Scophthalmus maximus];AWP12048.1//putative solute carrier family 43 member 3 isoform 2 [Scophthalmus maximus]
SMAX5B_019302	CP026251.1	complement(23827265..23831803)	9.51361	-3.31962	-9.98401	0.00148797	0.0224958	1	protein_coding	K17089//annexin A3	AWP07674.1//putative annexin A3-like [Scophthalmus maximus];XP_035497017.1//annexin A3a isoform X2 [Scophthalmus maximus]
SMAX5B_010161	CP026245.1	17416125..17473739	14.0216	-3.32252	-10.0041	1.69631e-05	0.000556156	0.321874	protein_coding	K12047//maltase-glucoamylase [EC:3.2.1.20 3.2.1.3]	AWO99215.1//putative maltase-glucoamylase intestinal-like [Scophthalmus maximus]
SMAX5B_002881	CP026252.1	complement(7381546..7386326)	2.05003	-3.32591	-10.0276	0.000882875	0.0148517	1	protein_coding	K00251//3-oxo-5-beta-steroid 4-dehydrogenase [EC:1.3.1.3]	AWP08103.1//3-oxo-5-beta-steroid 4-dehydrogenase isoform 2 [Scophthalmus maximus];AWP08104.1//3-oxo-5-beta-steroid 4-dehydrogenase isoform 3 [Scophthalmus maximus];AWP08107.1//3-oxo-5-beta-steroid 4-dehydrogenase isoform 6 [Scophthalmus maximus];AWP08106.1//3-oxo-5-beta-steroid 4-dehydrogenase isoform 5 [Scophthalmus maximus];AWP08102.1//3-oxo-5-beta-steroid 4-dehydrogenase [Scophthalmus maximus]
SMAX5B_016740	CP026244.1	19455697..19457612	5.86081	-3.39882	-10.5474	0.00175631	0.025559	1	protein_coding	K03663//4-galactosyl-N-acetylglucosaminide 3-alpha-L-fucosyltransferase [EC:2.4.1.152]	AWO98131.1//putative alpha-(1-3)-fucosyltransferase 9-like [Scophthalmus maximus]
SMAX5B_016047	CP026261.1	complement(19852042..19859691)	29.0394	-3.40615	-10.6011	0.00222261	0.0306131	1	protein_coding	K09640//transmembrane protease serine 9 [EC:3.4.21.-]	AWP19482.1//putative transmembrane protease serine 9-like [Scophthalmus maximus]
SMAX5B_015576	CP026264.1	3797373..3803390	27.2037	-3.40704	-10.6077	0.00293431	0.0378585	1	protein_coding	K19894//sperm acrosome membrane-associated protein 4	KAF0024353.1//hypothetical protein F2P81_023155 [Scophthalmus maximus];AWP21377.1//Hypothetical protein SMAX5B_015576 [Scophthalmus maximus]
SMAX5B_000773	CP026251.1	22130749..22137868	9.15973	-3.41124	-10.6386	5.61083e-05	0.00154816	1	protein_coding	K16500//protocadherin-15;K23757	AWP07606.1//putative GRAM domain-containing protein 3 [Scophthalmus maximus];XP_019968266.1//PREDICTED: GRAM domain-containing protein 3-like, partial [Paralichthys olivaceus];AWP07607.1//putative GRAM domain-containing protein 3 isoform 2 [Scophthalmus maximus]
SMAX5B_008813	CP026255.1	complement(13773931..13778295)	59.3282	-3.41929	-10.6981	7.59643e-33	5.77363e-30	1.44142e-28	protein_coding	K06767//Down syndrome cell adhesion molecule	KFM60995.1//hypothetical protein X975_04887, partial [Stegodyphus mimosarum];XP_035505958.1//Down syndrome cell adhesion molecule homolog isoform X2 [Scophthalmus maximus];XP_035505957.1//Down syndrome cell adhesion molecule-like isoform X1 [Scophthalmus maximus]
SMAX5B_021703	CP026256.1	2523439..2535792	12.7562	-3.41967	-10.7009	9.22931e-13	1.33037e-10	1.75126e-08	protein_coding	K09275//transcription factor CP2 and related proteins	XP_035507069.1//transcription factor CP2-like protein 1 isoform X2 [Scophthalmus maximus]
SMAX5B_019965	CP026245.1	6394285..6415081	9.08886	-3.44075	-10.8585	1.10222e-05	0.00038237	0.209146	protein_coding	K22652//transmembrane protein 25;K09186//[histone H3]-lysine4 N-trimethyltransferase MLL1 [EC:2.1.1.354]	AWO98664.1//putative tetratricopeptide repeat protein 36 [Scophthalmus maximus]
SMAX5B_010201	CP026245.1	complement(18066743..18131858)	6.51312	-3.44219	-10.8693	4.52285e-07	2.24551e-05	0.0085821	protein_coding	K04882//potassium voltage-gated channel Shaker-related subfamily A, beta member 1	XP_019950726.1//PREDICTED: voltage-gated potassium channel subunit beta-1 isoform X3 [Paralichthys olivaceus];XP_030629215.1//voltage-gated potassium channel subunit beta-2-like isoform X1 [Chanos chanos]
SMAX5B_000783	CP026256.1	complement(92..6306)	6.65128	-3.46533	-11.0451	9.83964e-06	0.000347458	0.186707	protein_coding	K22235//melanophilin	AWP12617.1//putative melanophilin-like, partial [Scophthalmus maximus]
SMAX5B_005318	CP026258.1	complement(20503645..20512635)	1.95805	-3.48571	-11.2022	0.000222424	0.00479891	1	protein_coding	K05048//solute carrier family 6 (neurotransmitter transporter, amino acid/orphan) member 15/16/17/18/20	XP_035463449.1//sodium- and chloride-dependent transporter XTRP3A-like [Scophthalmus maximus];XP_035527464.1//sodium- and chloride-dependent transporter XTRP3A-like [Morone saxatilis]
SMAX5B_021260	CP026251.1	4324157..4334176	7.60478	-3.4993	-11.3082	0.000415951	0.0080406	1	protein_coding	K08027//nuclear receptor subfamily 5 group A member 2	XP_035496569.1//steroidogenic factor 1-like [Scophthalmus maximus]
SMAX5B_021590	CP026250.1	1014035..1021581	7.56052	-3.52568	-11.5169	1.6428e-05	0.000542872	0.311722	protein_coding	K15014//solute carrier family 29 (equilibrative nucleoside transporter), member 1/2/3	XP_035494196.1//equilibrative nucleoside transporter 1-like isoform X3 [Scophthalmus maximus];XP_035494195.1//equilibrative nucleoside transporter 1-like isoform X2 [Scophthalmus maximus]
SMAX5B_015679	CP026264.1	5488476..5489799	2.57316	-3.56466	-11.8323	0.00619499	0.0658643	1	protein_coding	K08760//apolipoprotein A-IV	XP_035476766.1//apolipoprotein A-I-like [Scophthalmus maximus]
SMAX5B_011508	CP026250.1	7985937..7992031	15.5351	-3.59325	-12.0691	5.81734e-13	8.84289e-11	1.10384e-08	protein_coding	K15103//solute carrier family 25 (mitochondrial uncoupling protein), member 8/9	XP_035491884.1//mitochondrial brown fat uncoupling protein 1 isoform X1 [Scophthalmus maximus]
SMAX5B_021121	CP026258.1	complement(18712608..18713956)	110.668	-3.59595	-12.0917	0.000462652	0.00880946	1	protein_coding	K23772;K23758	XP_035465130.1//protein S100-A1-like [Scophthalmus maximus]
SMAX5B_005101	CP026252.1	complement(5287127..5298824)	1.4639	-3.61343	-12.2392	0.000210571	0.0046025	1	protein_coding	K06792//aggrecan 1	AWP08008.1//putative aggrecan core protein [Scophthalmus maximus];XP_035499238.1//LOW QUALITY PROTEIN: aggrecan core protein [Scophthalmus maximus];KAF0040536.1//hypothetical protein F2P81_006434 [Scophthalmus maximus]
SMAX5B_000713	CP026245.1	complement(19798581..19800890)	5021.24	-3.66873	-12.7174	0.00174462	0.025411	1	protein_coding	K08757//apolipoprotein A-I	XP_035478339.1//apolipoprotein A-I-like isoform X1 [Scophthalmus maximus]
SMAX5B_021282	CP026250.1	complement(171407..174157)	44.0418	-3.67157	-12.7424	0.00322847	0.040603	1	protein_coding	K10955//mucin-2	KAF3688093.1//Keratin-associated protein 16-1 [Channa argus]
SMAX5B_017764	CP026257.1	complement(20687247..20689259)	37.7725	-3.68904	-12.8977	5.8702e-06	0.000222072	0.111387	protein_coding	NA	XP_035462835.1//uncharacterized protein si:ch1073-126c3.2 [Scophthalmus maximus];AWP14678.1//Hypothetical protein SMAX5B_017764 [Scophthalmus maximus];AWP14680.1//Hypothetical protein SMAX5B_017764 [Scophthalmus maximus]
SMAX5B_019007	CP026255.1	complement(16649878..16666952)	0.980013	-3.71039	-13.0899	0.00266402	0.035173	1	protein_coding	K00714//wingless-type MMTV integration site family, member 8;K09401//forkhead box protein I	AWP12372.1//Protein Wnt [Scophthalmus maximus];XP_035505675.1//forkhead box protein I3b [Scophthalmus maximus]
SMAX5B_015206	CP026258.1	5677793..5679639	23.2785	-3.71233	-13.1076	0.000228283	0.00490633	1	protein_coding	K06087//claudin	XP_035463644.1//claudin-23 [Scophthalmus maximus]
SMAX5B_014781	CP026253.1	complement(16423848..16426036)	1.41271	-3.79142	-13.8462	0.00903734	0.0862027	1	protein_coding	K14427//solute carrier family 12 (potassium/chloride transporter), member 4/5/6;K06580//ammonium transporter Rh	KAF0036144.1//hypothetical protein F2P81_011456 [Scophthalmus maximus]
SMAX5B_006986	CP026243.1	9745608..9758393	15.7561	-3.81331	-14.0579	2.62135e-32	1.90572e-29	4.97402e-28	protein_coding	K00157//aldehyde oxidase [EC:1.2.3.1]	XP_018516824.1//PREDICTED: aldehyde oxidase [Lates calcarifer]
SMAX5B_007097	CP026244.1	complement(2630754..2633785)	20.2353	-3.95405	-15.4985	0.000235835	0.00502344	1	protein_coding	K09628//serine protease 27 [EC:3.4.21.-];K09640//transmembrane protease serine 9 [EC:3.4.21.-]	AWO97393.1//putative serine protease 27-like [Scophthalmus maximus];XP_035463688.1//tryptase-like [Scophthalmus maximus]
SMAX5B_009675	CP026264.1	complement(11250038..11251715)	3.36341	-3.96279	-15.5926	0.000676772	0.011937	1	protein_coding	K18489//homeobox protein DLX5	AWP21823.1//putative homeobox protein DLX-5 [Scophthalmus maximus]
SMAX5B_002287	CP026248.1	11052121..11062261	39.3622	-4.00106	-16.0118	1.8203e-05	0.000589869	0.345402	protein_coding	K23441//hepatocyte growth factor-like protein	XP_035486377.1//hepatocyte growth factor-like protein isoform X1 [Scophthalmus maximus];AWP02652.1//putative hepatocyte growth factor-like protein-like [Scophthalmus maximus]
SMAX5B_017671	CP026254.1	complement(17888048..17903130)	0.332447	-4.00248	-16.0275	0.00545138	0.059733	1	protein_coding	K06240//laminin, alpha 3/5;K01365//cathepsin L [EC:3.4.22.15]	AWP11248.1//putative laminin subunit alpha-3-like [Scophthalmus maximus];XP_035504674.1//cathepsin L1 [Scophthalmus maximus]
SMAX5B_007411	CP026250.1	12529479..12533481	254.024	-4.00575	-16.0639	0.000832552	0.0141422	1	protein_coding	NA	AWP05718.1//Hypothetical protein SMAX5B_007411 [Scophthalmus maximus];AWP05719.1//Hypothetical protein SMAX5B_007411 [Scophthalmus maximus];AWP05723.1//Hypothetical protein SMAX5B_007411 [Scophthalmus maximus];AWP05720.1//Hypothetical protein SMAX5B_007411 [Scophthalmus maximus];AWP05722.1//Hypothetical protein SMAX5B_007411 [Scophthalmus maximus];AWP05721.1//Hypothetical protein SMAX5B_007411 [S…
SMAX5B_021179	CP026247.1	987373..995045	318.189	-4.11046	-17.2732	9.88e-05	0.00247681	1	protein_coding	K10955//mucin-2;K13912//deleted in malignant brain tumors 1 protein	AWP01050.1//CUB/zona pellucida-like domains 1-like protein-like [Scophthalmus maximus];XP_034424530.1//uncharacterized protein LOC117751752 [Hippoglossus hippoglossus]
SMAX5B_012619	CP026247.1	complement(13693814..13701284)	17.3983	-4.11067	-17.2757	0.000151538	0.00354882	1	protein_coding	K22283//hepatic triacylglycerol lipase [EC:3.1.1.3]	KAF0043218.1//hypothetical protein F2P81_004555 [Scophthalmus maximus]
SMAX5B_005849	CP026249.1	complement(14057688..14059920)	19.1473	-4.11311	-17.3049	0.000466995	0.00884328	1	protein_coding	K13023//carboxypeptidase N regulatory subunit	AWP04369.1//putative carboxypeptidase N subunit 2-like [Scophthalmus maximus]
SMAX5B_012591	CP026247.1	11832063..11835193	5.90865	-4.12209	-17.4129	0.000616068	0.0110529	1	protein_coding	K07419//vitamin D 25-hydroxylase [EC:1.14.14.24]	XP_035485169.1//vitamin D 25-hydroxylase isoform X2 [Scophthalmus maximus]
SMAX5B_000329	CP026259.1	12383843..12386501	1.85002	-4.14488	-17.6902	0.00325157	0.040818	1	protein_coding	K10104//ficolin;K05466//angiopoietin 2	AWP16636.1//putative fibrinogen-like protein 1 [Scophthalmus maximus]
SMAX5B_018072	CP026257.1	complement(6705763..6725008)	1.62241	-4.16538	-17.9433	0.00303709	0.0386772	1	protein_coding	K00280//lysyl oxidase-like protein 2/3/4 [EC:1.4.3.-]	XP_035462628.1//lysyl oxidase homolog 4 [Scophthalmus maximus]
SMAX5B_020470	CP026254.1	3316009..3321842	6.59867	-4.17445	-18.0566	0.000101985	0.00254141	1	protein_coding	K16449//regulator of G-protein signaling	XP_035503733.1//regulator of G-protein signaling 21-like [Scophthalmus maximus]
SMAX5B_017202	CP026245.1	complement(23878132..23882813)	66.9817	-4.20303	-18.4178	4.26175e-06	0.000165723	0.0808667	protein_coding	K06087//claudin	XP_035477908.1//claudin-1-like [Scophthalmus maximus]
SMAX5B_019860	CP026245.1	5619682..5623487	17.6624	-4.25158	-19.0482	0.00018712	0.00419436	1	protein_coding	K06087//claudin	AWO98624.1//putative claudin-4-like [Scophthalmus maximus]
SMAX5B_014477	CP026253.1	complement(11061833..11063229)	2.14626	-4.31617	-19.9203	0.00873357	0.0842181	1	protein_coding	K09405//forkhead box protein L	AWP09533.1//putative forkhead box protein L2-like [Scophthalmus maximus];XP_035502153.1//forkhead domain-containing protein [Scophthalmus maximus]
SMAX5B_018429	CP026256.1	18080383..18084606	616.506	-4.34161	-20.2747	6.5787e-05	0.00176273	1	protein_coding	K21125//mucin-5AC;K18977//hemopexin	QKE53087.1//wap65-1 [Micropterus salmoides];ACU86959.1//warm temperature acclimation-related 65 kDa protein [Paralichthys olivaceus];XP_029991464.1//mucin-5AC-like [Sphaeramia orbicularis];XP_035531906.1//hemopexin [Morone saxatilis]
SMAX5B_002207	CP026248.1	13590214..13605651	2.94323	-4.34816	-20.367	0.00120711	0.0190776	1	protein_coding	K13576//solute carrier family 38 (sodium-coupled neutral amino acid transporter), member 3	XP_035488110.1//sodium-coupled neutral amino acid transporter 3-like isoform X1 [Scophthalmus maximus];XP_035488113.1//sodium-coupled neutral amino acid transporter 3-like isoform X2 [Scophthalmus maximus]
SMAX5B_018258	CP026256.1	13870262..13875324	17.4764	-4.37084	-20.6897	1.17132e-06	5.23679e-05	0.0222257	protein_coding	K08470//ocular albinism type 1 protein	AWP13218.1//putative G-protein coupled receptor 143 [Scophthalmus maximus]
SMAX5B_019759	CP026244.1	256347..261472	98.9908	-4.46739	-22.1216	3.67655e-05	0.00109193	0.697626	protein_coding	K21125//mucin-5AC	XP_035474004.1//mucin-5AC-like [Scophthalmus maximus]
SMAX5B_007969	CP026254.1	complement(22590701..22601322)	1.46489	-4.54723	-23.3805	0.00401225	0.0481614	1	protein_coding	K08606//meprin B [EC:3.4.24.63]	AWP11510.1//putative meprin A subunit beta-like [Scophthalmus maximus]
SMAX5B_013646	CP026246.1	complement(25611050..25613677)	3.20365	-4.63408	-24.8312	0.000611279	0.0109787	1	protein_coding	K01109//inositol polyphosphate-4-phosphatase [EC:3.1.3.66];K01239//purine nucleosidase [EC:3.2.2.1]	AWP00784.1//putative inosine-uridine preferring nucleoside hydrolase-like [Scophthalmus maximus]
SMAX5B_000355	CP026259.1	complement(10911687..10913711)	121.831	-4.74471	-26.8102	1.61441e-09	1.28546e-07	3.06335e-05	protein_coding	K04525//serpin A	AWP16534.1//Protein Z-dependent protease inhibitor isoform 3 [Scophthalmus maximus]
SMAX5B_011580	CP026250.1	complement(9969130..9984536)	15.2903	-4.75277	-26.9604	2.86993e-09	2.20008e-07	5.44569e-05	protein_coding	K04224//tachykinin receptor 3	AWP05556.1//putative neuromedin-K receptor [Scophthalmus maximus]
SMAX5B_021015	CP026261.1	14349038..14352072	51.7809	-4.79706	-27.8009	1.35663e-13	2.29134e-11	2.57421e-09	protein_coding	K17256//insulin-like growth factor-binding protein complex acid labile subunit	KAF0032877.1//hypothetical protein F2P81_015167 [Scophthalmus maximus]
SMAX5B_009580	CP026260.1	3447395..3450438	10.3488	-4.80545	-27.9631	2.14592e-06	8.88167e-05	0.0407189	protein_coding	K01242//ADP-ribosyl cyclase 1 [EC:3.2.2.6 2.4.99.20]	AWP17147.1//ADP-ribosyl cyclase 1 [Scophthalmus maximus]
SMAX5B_007282	CP026250.1	complement(13969588..13974603)	1.88092	-4.83107	-28.4641	0.00102725	0.0168234	1	protein_coding	K21841//TBC1 domain family member 24	AWP05833.1//putative TBC1 domain family member 24-like [Scophthalmus maximus]
SMAX5B_017201	CP026245.1	23429296..23432677	38.7614	-4.87715	-29.3879	1.30686e-07	7.48354e-06	0.00247976	protein_coding	K23573//dentin sialophosphoprotein	XP_027132235.1//uncharacterized protein DDB_G0271670, partial [Larimichthys crocea];XP_031644174.1//uncharacterized protein DDB_G0271670-like, partial [Oncorhynchus kisutch]
SMAX5B_001575	CP026250.1	complement(20848677..20853039)	7.67498	-4.89802	-29.8162	6.64555e-06	0.000247484	0.126099	protein_coding	K01047//secretory phospholipase A2 [EC:3.1.1.4]	AWP06278.1//Group XIIB secretory phospholipase A2-like protein [Scophthalmus maximus];AWP06279.1//Group XIIB secretory phospholipase A2-like protein isoform 2 [Scophthalmus maximus]
SMAX5B_005781	CP026249.1	complement(4311889..4320422)	391.536	-4.90592	-29.9798	4.39104e-08	2.74991e-06	0.000833199	protein_coding	K04008//CD59 antigen	XP_035489840.1//secreted seminal-vesicle Ly-6 protein 1 [Scophthalmus maximus]
SMAX5B_011700	CP026243.1	complement(16820539..16834707)	20.4968	-4.92839	-30.4505	4.69989e-05	0.00133198	0.891804	protein_coding	K06499//carcinoembryonic antigen-related cell adhesion molecule	AWO96334.1//putative carcinoembryonic antigen-related cell adhesion molecule 5-like [Scophthalmus maximus];XP_019948219.1//PREDICTED: carcinoembryonic antigen-related cell adhesion molecule 5-like [Paralichthys olivaceus]
SMAX5B_016443	CP026248.1	complement(37801..42176)	25.492	-4.93933	-30.6822	2.38125e-10	2.19983e-08	4.51842e-06	protein_coding	K01596//phosphoenolpyruvate carboxykinase (GTP) [EC:4.1.1.32]	KAF0035585.1//hypothetical protein F2P81_013343 [Scophthalmus maximus]
SMAX5B_006019	CP026249.1	complement(15267879..15273675)	38.1402	-4.94004	-30.6972	2.20857e-07	1.19513e-05	0.00419076	protein_coding	K03997//complement component 8 subunit alpha	AWP04475.1//putative complement component C8 alpha chain [Scophthalmus maximus]
SMAX5B_020215	CP026260.1	7340270..7342590	11.159	-4.9438	-30.7774	1.11002e-06	4.99792e-05	0.0210627	protein_coding	K04218//somatostatin receptor 2	XP_035469405.1//somatostatin receptor type 2-like [Scophthalmus maximus]
SMAX5B_007693	CP026244.1	complement(11379438..11397696)	4.50511	-4.95043	-30.9191	5.00159e-05	0.00140322	0.949052	protein_coding	K00693//glycogen synthase [EC:2.4.1.11]	XP_023274543.1//glycogen [starch] synthase, liver [Seriola lalandi dorsalis]
SMAX5B_004863	CP026246.1	18251933..18282283	3.01017	-4.95712	-31.0629	0.00193865	0.0277535	1	protein_coding	K11160//diacylglycerol O-acyltransferase 2 [EC:2.3.1.20 2.3.1.75]	XP_022050627.1//diacylglycerol O-acyltransferase 2 [Acanthochromis polyacanthus]
SMAX5B_020043	CP026261.1	complement(20024543..20038987)	9.96112	-4.96719	-31.2804	5.63817e-07	2.71119e-05	0.0106984	protein_coding	K07604//type I keratin, acidic	AWP19500.1//putative keratin type I cytoskeletal 13-like [Scophthalmus maximus]
SMAX5B_004119	CP026246.1	10187734..10190659	3.59877	-4.98131	-31.5882	0.000133777	0.00319556	1	protein_coding	NA	XP_035480554.1//uncharacterized protein LOC118300353 isoform X1 [Scophthalmus maximus]
SMAX5B_018845	CP026252.1	complement(993931..1013247)	11.9547	-5.03261	-32.7315	3.26214e-07	1.68874e-05	0.00618991	protein_coding	K00894//ethanolamine kinase [EC:2.7.1.82]	XP_034444920.1//ethanolamine kinase 1 [Hippoglossus hippoglossus]
SMAX5B_012995	CP026250.1	complement(1683030..1708807)	48.9527	-5.11038	-34.5444	3.65322e-10	3.24923e-08	6.93198e-06	protein_coding	K03990//complement component 3	AWP05156.1//complement component c3b tandem duplicate 1 precursor [Scophthalmus maximus];XP_035492634.1//complement C3-like [Scophthalmus maximus]
SMAX5B_000635	CP026245.1	21383680..21387966	4.50016	-5.37863	-41.6035	0.000127687	0.00306761	1	protein_coding	K04995//potassium inwardly-rectifying channel subfamily J member 1	KAF0030815.1//hypothetical protein F2P81_017546 [Scophthalmus maximus]
SMAX5B_006441	CP026249.1	14963416..14967849	4.78921	-5.39964	-42.2137	1.61919e-06	6.9244e-05	0.030724	protein_coding	K22288//angiopoietin-like 3	XP_035491044.1//angiopoietin-related protein 3-like [Scophthalmus maximus]
SMAX5B_015251	CP026251.1	complement(24672833..24673491)	8.41081	-5.42743	-43.0348	0.000807104	0.0138274	1	protein_coding	K12749//myosin light chain 3;K12750//myosin light chain 4	XP_035496963.1//myosin light chain 3-like [Scophthalmus maximus]
SMAX5B_019890	CP026245.1	complement(7605613..7606799)	8.26103	-5.43124	-43.1486	0.000305345	0.00625695	1	protein_coding	K06087//claudin	XP_035477566.1//claudin-4-like [Scophthalmus maximus]
SMAX5B_005845	CP026249.1	complement(16397216..16410034)	24.3801	-5.54603	-46.7221	1.46254e-10	1.3895e-08	2.77517e-06	protein_coding	K12875//apoptotic chromatin condensation inducer in the nucleus;K20283//golgin subfamily A member 4;K20478//golgin subfamily B member 1	AWP04568.1//putative myosin heavy chain fast skeletal muscle-like isoform 3 [Scophthalmus maximus];AWP04566.1//putative myosin heavy chain fast skeletal muscle-like [Scophthalmus maximus];XP_035488946.1//apoptotic chromatin condensation inducer in the nucleus [Scophthalmus maximus];XP_035488947.1//cingulin [Scophthalmus maximus]
SMAX5B_002120	CP026243.1	437903..444962	302.358	-5.59449	-48.3181	1.51191e-10	1.42828e-08	2.86885e-06	protein_coding	K01313//coagulation factor II (thrombin) [EC:3.4.21.5]	AWO95525.1//putative prothrombin isoform 3 [Scophthalmus maximus];XP_035500774.1//prothrombin [Scophthalmus maximus];AWO95526.1//putative prothrombin isoform 4 [Scophthalmus maximus]
SMAX5B_009928	CP026252.1	complement(10474567..10476986)	8.70004	-5.65228	-50.2928	1.11588e-06	5.00232e-05	0.0211739	protein_coding	K00699//glucuronosyltransferase [EC:2.4.1.17]	XP_035497849.1//UDP-glucuronosyltransferase 2C1-like [Scophthalmus maximus]
SMAX5B_011762	CP026243.1	16467182..16468652	105.25	-5.70988	-52.3412	1.16502e-12	1.60995e-10	2.21063e-08	protein_coding	K08760//apolipoprotein A-IV	XP_035493452.1//apolipoprotein A-I-like [Scophthalmus maximus]
SMAX5B_005208	CP026248.1	complement(7132957..7140003)	78.1349	-5.80422	-55.8784	1.1112e-11	1.2903e-09	2.10849e-07	protein_coding	K07436//vitamin D3 24-hydroxylase [EC:1.14.15.16]	AWP02484.1//cyp24a1l [Scophthalmus maximus]
SMAX5B_003631	CP026258.1	complement(7072470..7075813)	119.502	-5.82366	-56.6366	3.41572e-10	3.07066e-08	6.48133e-06	protein_coding	K01830//prostaglandin-H2 D-isomerase [EC:5.3.99.2]	AWP15123.1//Lipocalin [Scophthalmus maximus]
SMAX5B_007538	CP026250.1	16787420..16792277	110.865	-5.84355	-57.4226	7.3056e-10	6.10785e-08	1.38624e-05	protein_coding	K06255//basement membrane-specific heparan sulfate proteoglycan core protein	XP_018535277.1//PREDICTED: basement membrane-specific heparan sulfate proteoglycan core protein-like [Lates calcarifer];AWP05994.1//putative basement membrane-specific heparan sulfate proteoglycan core protein-like [Scophthalmus maximus]
SMAX5B_004485	CP026244.1	979170..983345	1112.96	-5.88627	-59.1486	3.82002e-10	3.3796e-08	7.24848e-06	protein_coding	K03904//fibrinogen beta chain	AWO97286.1//Fibrinogen beta chain isoform 2 [Scophthalmus maximus];AWO97287.1//Fibrinogen beta chain isoform 3 [Scophthalmus maximus];AWO97288.1//Fibrinogen beta chain isoform 4 [Scophthalmus maximus];KAF0028939.1//hypothetical protein F2P81_018044 [Scophthalmus maximus]
SMAX5B_005892	CP026249.1	complement(14474486..14478756)	181.25	-6.02935	-65.3154	3.34983e-12	4.05888e-10	6.3563e-08	protein_coding	K03906//coagulation factor XIII B polypeptide;K04004//complement factor H	XP_035489404.1//coagulation factor XIII B chain-like [Scophthalmus maximus];AWP04411.1//putative complement factor H-like [Scophthalmus maximus]
SMAX5B_020267	CP026260.1	12336218..12343368	3.32019	-6.29594	-78.5719	0.000109	0.00267542	1	protein_coding	K13855//solute carrier family 4 (anion exchanger), member 2;K06573//solute carrier family 4 (anion exchanger), member 1	AWP17690.1//Band 3 anion exchange protein [Scophthalmus maximus]
SMAX5B_010577	CP026244.1	complement(21347805..21368540)	30.5586	-6.32028	-79.9088	2.01094e-12	2.64763e-10	3.81575e-08	protein_coding	K00500//phenylalanine-4-hydroxylase [EC:1.14.16.1]	PWA30183.1//hypothetical protein CCH79_00014930 [Gambusia affinis];AWO98231.1//Phenylalanine-4-hydroxylase [Scophthalmus maximus];XP_035477514.1//phenylalanine-4-hydroxylase isoform X1 [Scophthalmus maximus]
SMAX5B_020251	CP026260.1	11760162..11767890	15.6739	-6.33563	-80.7631	3.77092e-07	1.91652e-05	0.00715532	protein_coding	K18246//carbonic anhydrase 4 [EC:4.2.1.1]	AWP17620.1//putative carbonic anhydrase-like [Scophthalmus maximus]
SMAX5B_012524	CP026247.1	14333423..14340035	98.2489	-6.42471	-85.9074	2.59095e-07	1.38857e-05	0.00491633	protein_coding	K06580//ammonium transporter Rh	KAF5174476.1//hypothetical protein HST_G00005560 [Hippoglossus stenolepis]
SMAX5B_017282	CP026260.1	16461722..16462414	4.74263	-6.46443	-88.3055	0.0087582	0.0844069	1	protein_coding	K04868//voltage-dependent calcium channel gamma-3;K18626//trichohyalin;K12798//NACHT, LRR and PYD domains-containing protein 1	AWP17934.1//putative GTPase IMAP family member 8-like [Scophthalmus maximus];KAF0025615.1//hypothetical protein F2P81_022496 [Scophthalmus maximus]
SMAX5B_009998	CP026252.1	complement(16423595..16430756)	4.94825	-6.48923	-89.8368	7.30684e-05	0.00193014	1	protein_coding	K06580//ammonium transporter Rh	XP_010737167.2//ammonium transporter Rh type C [Larimichthys crocea]
SMAX5B_006098	CP026249.1	complement(12450930..12451477)	117.023	-6.74562	-107.309	1.24007e-05	0.000422306	0.235303	protein_coding	K14624//C-C motif chemokine 2;K16595//C-C motif chemokine 13;K16597//C-C motif chemokine 11;K21097//C-C motif chemokine 24	XP_035491765.1//regakine-1-like [Scophthalmus maximus];AWP04251.1//Hypothetical protein SMAX5B_006098 [Scophthalmus maximus]
SMAX5B_017377	CP026260.1	16460369..16461426	4.12383	-6.74989	-107.626	0.00651429	0.0684068	1	protein_coding	K18626//trichohyalin	AWP17933.1//putative GTPase IMAP family member 8-like [Scophthalmus maximus]
SMAX5B_007316	CP026250.1	12818420..12820072	5.18045	-6.76936	-109.089	0.00715492	0.0734873	1	protein_coding	K21892//myoglobin	XP_035494157.1//myoglobin [Scophthalmus maximus]
SMAX5B_005256	CP026258.1	19167400..19181363	18.1883	-6.78937	-110.613	2.03431e-06	8.48271e-05	0.038601	protein_coding	K06580//ammonium transporter Rh	XP_035464700.1//ammonium transporter Rh type B [Scophthalmus maximus]
SMAX5B_004101	CP026246.1	complement(13681196..13683172)	44.9739	-6.80185	-111.573	9.90392e-10	8.11781e-08	1.87927e-05	protein_coding	K04848//voltage-gated sodium channel type IV beta;K06770//myelin protein zero	AWP00245.1//putative myelin protein zero-like protein 2 [Scophthalmus maximus];XP_035481389.1//myelin protein zero-like protein 2 [Scophthalmus maximus]
SMAX5B_015493	CP026259.1	complement(18966371..18991806)	10.2881	-6.89916	-119.359	1.63345e-12	2.20266e-10	3.09948e-08	protein_coding	K14462//apolipoprotein B	XP_035465788.1//apolipoprotein B-100 isoform X1 [Scophthalmus maximus];AWP16913.1//putative apolipoprotein B-100-like [Scophthalmus maximus]
SMAX5B_004442	CP026244.1	complement(984727..991775)	494.846	-7.36112	-164.406	3.0745e-17	8.16011e-15	5.83386e-13	protein_coding	K03903//fibrinogen alpha chain;K09228//KRAB domain-containing zinc finger protein	XP_031419482.1//zinc finger protein 850-like [Clupea harengus];AWO97290.1//putative fibrinogen alpha chain-like [Scophthalmus maximus]
SMAX5B_002427	CP026243.1	5520995..5523986	35.6677	-7.4117	-170.273	3.53019e-09	2.62348e-07	6.69853e-05	protein_coding	K01300//carboxypeptidase B2 [EC:3.4.17.20]	XP_035482719.1//carboxypeptidase B2 [Scophthalmus maximus]
SMAX5B_002156	CP026243.1	284290..289109	59.9659	-7.81036	-224.466	1.62021e-13	2.68234e-11	3.07436e-09	protein_coding	K01314//coagulation factor X [EC:3.4.21.6]	XP_035485866.1//LOW QUALITY PROTEIN: uncharacterized protein LOC118308402 [Scophthalmus maximus]
SMAX5B_002123	CP026243.1	270190..274271	27.709	-7.9473	-246.817	3.03106e-07	1.58879e-05	0.00575144	protein_coding	K01344//protein C (activated) [EC:3.4.21.69];K01320//coagulation factor VII [EC:3.4.21.21]	XP_035492852.1//coagulation factor VII [Scophthalmus maximus]
SMAX5B_019626	CP026262.1	13804372..13821118	51.1797	-8.28567	-312.057	7.68253e-20	2.62162e-17	1.45776e-15	protein_coding	K14462//apolipoprotein B	AWP20152.1//putative apolipoprotein B-100-like isoform 2 [Scophthalmus maximus]

## Sheet: S_Bac vs S_C Liver
Name	Chromosome	Region	Max group mean	Log₂ fold change	Fold change	P-value	FDR p-value	Bonferroni	Biotype	Kegg Orthology	Nr Description
SMAX5B_012399	CP026247.1	complement(7886683..7895218)	41.166	11.7272	3390.37	1.41553e-06	1.73739e-05	0.0244618	protein_coding	K09708//angiotensin-converting enzyme 2 [EC:3.4.17.23]	XP_035484042.1//angiotensin-converting enzyme 2 [Scophthalmus maximus]
SMAX5B_015407	CP026252.1	complement(23686147..23696213)	114.852	10.9841	2025.53	1.00275e-15	5.21465e-14	1.73286e-11	protein_coding	K11140//aminopeptidase N [EC:3.4.11.2]	XP_034444576.1//aminopeptidase N-like [Hippoglossus hippoglossus]
SMAX5B_009430	CP026255.1	7223640..7238695	196.919	10.4901	1438.21	4.15612e-12	1.33077e-10	7.1822e-08	protein_coding	K06560//mannose receptor, C type;K22244//regenerating islet-derived protein 4;K06502//CD69 antigen;K17513//C-type lectin superfamily 17 member A	XP_035505038.1//ladderlectin-like isoform X4 [Scophthalmus maximus];AWP11809.1//putative ladderlectin-like [Scophthalmus maximus];XP_035505035.1//ladderlectin-like isoform X1 [Scophthalmus maximus];XP_035505046.1//ladderlectin-like isoform X1 [Scophthalmus maximus]
SMAX5B_003897	CP026243.1	1101169..1108858	82.2645	10.0751	1078.69	1.49528e-14	6.49674e-13	2.58399e-10	protein_coding	K14206//solute carrier family 15 (oligopeptide transporter), member 1	AWO95554.1//Oligopeptide transporter [Scophthalmus maximus]
SMAX5B_007051	CP026248.1	complement(26686111..26696111)	12.0578	9.79365	887.527	6.53024e-05	0.000527613	1	protein_coding	K01183//chitinase [EC:3.2.1.14]	AWP03519.1//putative acidic mammalian chitinase-like [Scophthalmus maximus]
SMAX5B_013935	CP026258.1	16019409..16020923	30.5284	9.10474	550.556	0.000115244	0.000866917	1	protein_coding	K08758//apolipoprotein A-II	KAF0031759.1//hypothetical protein F2P81_016314 [Scophthalmus maximus]
SMAX5B_000242	CP026251.1	21737621..21740400	13.1964	8.85823	464.081	8.89236e-05	0.000690436	1	protein_coding	K04519//interleukin 1 beta	XP_035496710.1//interleukin-1 beta-like [Scophthalmus maximus]
SMAX5B_003516	CP026258.1	complement(8011214..8016245)	4.01681	8.83265	455.923	0.000319993	0.0020901	1	protein_coding	K08818//cell division cycle 2-like [EC:2.7.11.22]	AWP15179.1//putative neurofilament medium polypeptide-like isoform 10 [Scophthalmus maximus];AWP15185.1//putative neurofilament medium polypeptide-like isoform 7 [Scophthalmus maximus];AWP15180.1//putative neurofilament medium polypeptide-like isoform 2 [Scophthalmus maximus];XP_035464040.1//uncharacterized protein LOC118284933 isoform X1 [Scophthalmus maximus];AWP15178.1//putative neurofilament …
SMAX5B_022440	CP026254.1	complement(9637353..9655218)	4.34404	8.7253	423.231	0.000311793	0.00204561	1	protein_coding	K01077//alkaline phosphatase [EC:3.1.3.1];K21411//ankyrin repeat and LEM domain-containing protein 1	XP_026053643.1//intestinal-type alkaline phosphatase-like isoform X1 [Carassius auratus];AWP10826.1//Alkaline phosphatase [Scophthalmus maximus]
SMAX5B_007053	CP026248.1	complement(26703587..26710455)	32.849	8.69051	413.145	3.37973e-08	5.72843e-07	0.000584051	protein_coding	K06760//contactin 2;K01183//chitinase [EC:3.2.1.14]	AWP03520.1//Glyco hydro 18 multi-domain protein [Scophthalmus maximus];XP_023280497.1//acidic mammalian chitinase-like [Seriola lalandi dorsalis]
SMAX5B_002496	CP026255.1	complement(11846546..11848138)	38.0467	8.42511	343.725	1.15374e-11	3.43301e-10	1.99378e-07	protein_coding	K15049//endonuclease domain-containing 1 protein	AWP12038.1//putative endonuclease domain-containing 1 protein-like [Scophthalmus maximus]
SMAX5B_021536	CP026246.1	complement(3191639..3198376)	3.34594	8.24501	303.385	0.000586597	0.00353229	1	protein_coding	K01316//enterokinase [EC:3.4.21.9]	AWO99724.1//putative enteropeptidase-like [Scophthalmus maximus]
SMAX5B_005899	CP026249.1	13263654..13265452	147.32	8.13392	280.902	1.03673e-43	6.63915e-41	1.79158e-39	protein_coding	K05504//growth differentiation factor 15	AWP04292.1//Growth differentiation factor 15 [Scophthalmus maximus]
SMAX5B_000015	CP026262.1	complement(16768897..16772376)	4515.63	8.0728	269.249	2.65069e-95	1.95059e-91	4.58066e-91	protein_coding	K10168//toll-like receptor 5	ANS71058.1//tlr5-a [Scophthalmus maximus]
SMAX5B_019642	CP026262.1	10864284..10877438	9.20376	7.83108	227.714	8.3839e-10	1.88242e-08	1.44882e-05	protein_coding	K04908//potassium voltage-gated channel Eag-related subfamily H member 5	AWP20001.1//putative potassium voltage-gated channel subfamily H member 5-like [Scophthalmus maximus]
SMAX5B_022288	CP026254.1	complement(14062228..14068866)	64.2689	7.79176	221.591	2.30756e-38	9.18597e-36	3.9877e-34	protein_coding	K06494//selectin, endothelial cell	XP_035502827.1//E-selectin-like isoform X1 [Scophthalmus maximus]
SMAX5B_018232	CP026256.1	complement(5527084..5536778)	1.29767	7.69958	207.875	0.00140451	0.00752531	1	protein_coding	K01229//lactase-phlorizin hydrolase [EC:3.2.1.108 3.2.1.62]	AWP12813.1//putative lactase-phlorizin hydrolase-like [Scophthalmus maximus]
SMAX5B_005769	CP026249.1	complement(11229266..11230608)	6.06208	7.61136	195.545	0.00161023	0.00845227	1	protein_coding	K23284//C1q-related factor	KAF0047012.1//hypothetical protein F2P81_000645 [Scophthalmus maximus]
SMAX5B_012915	CP026246.1	28744320..28799364	2.17638	7.48695	179.389	0.00109884	0.0060891	1	protein_coding	K05849//solute carrier family 8 (sodium/calcium exchanger)	AWP00899.1//putative sodium/calcium exchanger 1-like [Scophthalmus maximus];XP_035480575.1//solute carrier family 8 member 4b isoform X2 [Scophthalmus maximus]
SMAX5B_006483	CP026249.1	14860016..14861417	4.78399	7.46818	177.071	0.00205275	0.010358	1	protein_coding	NA	AWP04448.1//putative leucine-rich repeat-containing protein 19-like [Scophthalmus maximus];KAF0047241.1//hypothetical protein F2P81_000874 [Scophthalmus maximus]
SMAX5B_005895	CP026249.1	12159017..12172158	2.06375	7.25173	152.402	0.00280643	0.0134513	1	protein_coding	K08397//relaxin family peptide receptor 3	AWP04225.1//putative relaxin-3 receptor 1-like [Scophthalmus maximus]
SMAX5B_002145	CP026243.1	166636..176697	1.9661	7.13038	140.106	0.00321828	0.0151058	1	protein_coding	K08464//adhesion G-protein coupled receptor G7	AWO95490.1//putative G-protein coupled receptor 128-like [Scophthalmus maximus]
SMAX5B_004584	CP026245.1	9937032..9941564	2.76745	7.12941	140.012	0.00189429	0.00968449	1	protein_coding	K03327//multidrug resistance protein, MATE family	XP_035479336.1//multidrug and toxin extrusion protein 1-like [Scophthalmus maximus]
SMAX5B_012609	CP026247.1	16088662..16097556	3.74676	7.09773	136.972	0.00345089	0.0160341	1	protein_coding	K00698//chitin synthase [EC:2.4.1.16]	AWP01707.1//Hypothetical protein SMAX5B_012609 [Scophthalmus maximus]
SMAX5B_016557	CP026251.1	complement(13708138..13715889)	1.3499	7.05757	133.211	0.00223415	0.0111096	1	protein_coding	K19750//dynein assembly factor 1, axonemal	AWP07172.1//putative leucine-rich repeat-containing protein 43 [Scophthalmus maximus]
SMAX5B_012004	CP026243.1	complement(23306758..23309603)	38.4673	7.00196	128.174	2.73442e-17	1.64389e-15	4.72535e-13	protein_coding	K05143//tumor necrosis factor receptor superfamily member 6B	AWO96889.1//putative tumor necrosis factor receptor superfamily member 11B-like [Scophthalmus maximus]
SMAX5B_003875	CP026243.1	complement(2305532..2308962)	27.8733	6.99915	127.924	0.00250811	0.0122609	1	protein_coding	K23009//carboxypeptidase O [EC:3.4.17.-]	XP_035487791.1//carboxypeptidase O-like [Scophthalmus maximus]
SMAX5B_017268	CP026260.1	complement(16000027..16002025)	3.274	6.99661	127.699	0.00411422	0.0185033	1	protein_coding	K23841//clarin	AWP17903.1//putative clarin-3 [Scophthalmus maximus]
SMAX5B_007487	CP026250.1	complement(15988898..15996462)	5.84215	6.99202	127.294	3.55909e-08	6.00394e-07	0.000615046	protein_coding	K06716//ADP-ribosyltransferase 1 [EC:2.4.2.31];K06717//ADP-ribosyltransferase 4 [EC:2.4.2.31];K15043//importin subunit alpha-1/8	AWP05939.1//Importin subunit alpha [Scophthalmus maximus];KAF0037624.1//hypothetical protein F2P81_010498 [Scophthalmus maximus]
SMAX5B_006946	CP026249.1	complement(25787689..25793371)	19.0646	6.99029	127.142	0.00238832	0.0117611	1	protein_coding	K05334//solute carrier family 6 (neurotransmitter transporter) member 19	XP_026156499.1//sodium-dependent neutral amino acid transporter B(0)AT1-like [Mastacembelus armatus]
SMAX5B_005477	CP026244.1	13332165..13344664	2.18881	6.98593	126.758	0.00213646	0.0107289	1	protein_coding	K05168//interleukin 17 receptor E;K16608//tubulin monoglycylase TTLL3/8 [EC:6.3.2.-]	AWO97933.1//putative interleukin-17 receptor E-like [Scophthalmus maximus]
SMAX5B_002319	CP026248.1	10302559..10304800	3.74047	6.93664	122.5	0.00398362	0.0179878	1	protein_coding	K22016//mucin-3/17	AWP02600.1//Intestinal mucin, partial [Scophthalmus maximus];KAF3690018.1//Mucin-17 [Channa argus]
SMAX5B_004416	CP026244.1	928862..934068	5.95829	6.9363	122.472	3.92567e-08	6.5706e-07	0.000678396	protein_coding	K03334//L-amino-acid oxidase [EC:1.4.3.2]	AWO97275.1//skin mucus antibacterial l-amino acid oxidase-like [Scophthalmus maximus];XP_035462908.1//L-amino-acid oxidase-like isoform X1 [Scophthalmus maximus]
SMAX5B_003183	CP026264.1	complement(651153..660070)	102.56	6.91081	120.326	1.22489e-45	9.02069e-43	2.11673e-41	protein_coding	K05143//tumor necrosis factor receptor superfamily member 6B;K05148//tumor necrosis factor receptor superfamily member 11B	AWP21163.1//putative tumor necrosis factor receptor superfamily member 6B-like [Scophthalmus maximus]
SMAX5B_007877	CP026254.1	complement(20087639..20090246)	4.31451	6.90838	120.124	0.00237266	0.0117036	1	protein_coding	K22156//protein Jade-3;K01027//3-oxoacid CoA-transferase [EC:2.8.3.5]	XP_035504597.1//PI-PLC X domain-containing protein 1 [Scophthalmus maximus]
SMAX5B_019974	CP026245.1	complement(7040155..7044012)	265.968	6.77215	109.3	6.46165e-104	9.51736e-100	1.11664e-99	protein_coding	K08670//suppressor of tumorigenicity protein 14 [EC:3.4.21.109]	KAF0030116.1//hypothetical protein F2P81_016847 [Scophthalmus maximus]
SMAX5B_016451	CP026248.1	907565..909385	4.96976	6.64326	99.9584	0.0069499	0.0285458	1	protein_coding	NA	XP_035488662.1//guanylin-like [Scophthalmus maximus]
SMAX5B_019336	CP026251.1	complement(23183529..23186265)	615.272	6.24873	76.042	6.57404e-80	2.42073e-76	1.13606e-75	protein_coding	K05512//C-C motif chemokine 19	XP_035496792.1//C-C motif chemokine 19-like [Scophthalmus maximus]
SMAX5B_022071	CP026252.1	complement(2671732..2681343)	13.4532	6.23458	75.3003	0.0069992	0.0287162	1	protein_coding	K16505//cadherin-related family member 5	AWP07901.1//putative cadherin-related family member 5-like [Scophthalmus maximus]
SMAX5B_010492	CP026251.1	complement(17371333..17380027)	63.0154	6.22264	74.6797	4.23495e-52	4.79819e-49	7.31841e-48	protein_coding	K01307//gamma-glutamyl hydrolase [EC:3.4.19.9];K10524//nicotinamide/nicotinate riboside kinase [EC:2.7.1.22 2.7.1.173]	XP_035495548.1//gamma-glutamyl hydrolase [Scophthalmus maximus];AWP07345.1//putative gamma-glutamyl hydrolase-like [Scophthalmus maximus];XP_035495550.1//nicotinamide riboside kinase 1 [Scophthalmus maximus]
SMAX5B_004673	CP026263.1	57955..61335	6.80389	6.1779	72.3993	0.00955764	0.0368134	1	protein_coding	K04161//5-hydroxytryptamine receptor 5	XP_035475631.1//uncharacterized protein LOC118291456 [Scophthalmus maximus]
SMAX5B_017358	CP026260.1	16855336..16856183	5.35076	6.15752	71.3836	0.00972344	0.0372966	1	protein_coding	K04819//5-hydroxytryptamine receptor 3	AWP17970.1//putative 5-hydroxytryptamine receptor 3A-like [Scophthalmus maximus]
SMAX5B_000493	CP026259.1	complement(8391388..8394864)	26.0748	6.14134	70.5873	1.25554e-20	1.18544e-18	2.1697e-16	protein_coding	K01365//cathepsin L [EC:3.4.22.15]	AWP16377.1//Cathepsin L [Scophthalmus maximus]
SMAX5B_010056	CP026252.1	14794984..14796186	72.0258	6.1262	69.8505	5.53079e-11	1.48927e-09	9.55776e-07	protein_coding	NA	AWP08568.1//Leptin a [Scophthalmus maximus]
SMAX5B_022065	CP026251.1	12333654..12340418	107.046	6.10839	68.9935	2.01897e-24	2.63243e-22	3.48899e-20	protein_coding	K12671//C-X-C motif chemokine 10	XP_035496848.1//uncharacterized protein cxcl11.5 [Scophthalmus maximus];XP_035496612.1//protein FAM151B [Scophthalmus maximus]
SMAX5B_011414	CP026250.1	complement(3956191..3958919)	364.408	6.09383	68.3006	3.9173e-72	1.15396e-68	6.76948e-68	protein_coding	K06769//intercellular adhesion molecule 5;K06523//intercellular adhesion molecule 2;K06527//vascular cell adhesion molecule 1	XP_035492247.1//hemicentin-1-like [Scophthalmus maximus]
SMAX5B_020757	CP026261.1	complement(14425361..14453480)	0.620814	6.06949	67.1579	0.00802168	0.0319589	1	protein_coding	K15621//BAI1-associated protein 3	AWP19154.1//putative BAI1-associated protein 3 [Scophthalmus maximus];XP_019949982.1//PREDICTED: BAI1-associated protein 3 [Paralichthys olivaceus]
SMAX5B_005307	CP026258.1	20667554..20672223	148.003	6.02755	65.2338	4.78444e-57	8.80876e-54	8.26799e-53	protein_coding	K06510//CD83 antigen	XP_035463520.1//CD83 antigen [Scophthalmus maximus]
SMAX5B_019659	CP026262.1	10837967..10848206	357.329	5.96326	62.3907	3.97295e-95	1.95059e-91	6.86566e-91	protein_coding	K01895//acetyl-CoA synthetase [EC:6.2.1.1]	XP_034435483.1//acetyl-coenzyme A synthetase 2-like, mitochondrial [Hippoglossus hippoglossus]
SMAX5B_005204	CP026248.1	8615941..8629961	18.0011	5.7396	53.4309	9.78223e-05	0.00075082	1	protein_coding	K03948//NADH dehydrogenase (ubiquinone) 1 alpha subcomplex subunit 4	XP_035486445.1//cytochrome c oxidase subunit NDUFA4 [Scophthalmus maximus];AWP02546.1//putative NADH dehydrogenase [Scophthalmus maximus]
SMAX5B_008076	CP026248.1	complement(1886742..1892574)	5.51153	5.72645	52.9462	9.65594e-06	9.57082e-05	0.166864	protein_coding	K01307//gamma-glutamyl hydrolase [EC:3.4.19.9]	XP_035488257.1//zgc:171566 isoform X2 [Scophthalmus maximus]
[truncated: 2,881 more rows]
